# Supplementary material for: Whole microbial community viability is not quantitatively reflected by propidium monoazide sequencing approach
Source: Microbiome. 2021 Jan 21;9:17. doi: 10.1186/s40168-020-00961-3 (PMC7819323; doi:10.1186/s40168-020-00961-3)
Supplement: Supplementary file 4 — Additional file 3. Multivariate tests for taxa associated with metadata. [file 40168_2020_961_MOESM4_ESM.xlsx]

## Sheet: Supplementary_file2_meta
Sample Name	Description	Sequencer Name	Sample	Collection	PMA treatment	Spike-in	Total DNA amount (ng)	16S copy number	log10 16S	Type	Experiment	Type	match	Average 16S copies per sample type	average 16S (log10) copies per sample type
Gp1_1	E. coli 100% live, 106 CFU/ml	Gp1_11	E.coli live	E.coli	No	No	27.21	2240000000000	12.4	sample	Pure culture	sample	Gp1_1	1060000000000	11.75
Gp1_2	E. coli 100% live, 106 CFU/ml	Gp1_22	E.coli live	E.coli	No	No	24.6	1650000000000	12.2	sample	Pure culture	sample	Gp1_2
Gp1_3	E. coli 100% live, 106 CFU/ml	Gp1_33	E.coli live	E.coli	No	No	27.96	257000000000	11.4	sample	Pure culture	sample	Gp1_3
Gp1_4	E. coli 100% live, 106 CFU/ml	Gp1_44	E.coli live	E.coli	No	No	17.58	109000000000	11	sample	Pure culture	sample	Gp1_4
Gp2_1	E. coli 0% live, 106 CFU/ml	Gp2_15	E.coli dead	E.coli	No	No	7.74	229000000	8.36	sample	Pure culture	sample	Gp2_1	5500000000	8.32
Gp2_2	E. coli 0% live, 106 CFU/ml	Gp2_26	E.coli dead	E.coli	No	No	5.61	140000000	8.15	sample	Pure culture	sample	Gp2_2
Gp2_3	E. coli 0% live, 106 CFU/ml	Gp2_37	E.coli dead	E.coli	No	No	8.16	260000000	8.41	sample	Pure culture	sample	Gp2_3
Gp2_4	E. coli 0% live, 106 CFU/ml	Gp2_48	E.coli dead	E.coli	No	No	5.4	220000000	8.34	sample	Pure culture	sample	Gp2_4
Gp3_1	S. sanguinis 100% live, 106 CFU/ml	Gp3_19	S.sanguinis live	S.sanguinis	No	No	35.7	4650000000000	12.7	sample	Pure culture	sample	Gp3_1	2090000000000	12.07
Gp3_2	S. sanguinis 100% live, 106 CFU/ml	Gp3_210	S.sanguinis live	S.sanguinis	No	No	33.6	2940000000000	12.5	sample	Pure culture	sample	Gp3_2
Gp3_3	S. sanguinis 100% live, 106 CFU/ml	Gp3_311	S.sanguinis live	S.sanguinis	No	No	36.6	459000000000	11.7	sample	Pure culture	sample	Gp3_3
Gp3_4	S. sanguinis 100% live, 106 CFU/ml	Gp3_412	S.sanguinis live	S.sanguinis	No	No	41.1	305000000000	11.5	sample	Pure culture	sample	Gp3_4
Gp4_1	S. sanguinis 0% live, 106 CFU/ml	Gp4_113	S.sanguinis dead	S.sanguinis	No	No	20.28	2080000000000	12.3	sample	Pure culture	sample	Gp4_1	576000000000	10.65
Gp4_2	S. sanguinis 0% live, 106 CFU/ml	Gp4_214	S.sanguinis dead	S.sanguinis	No	No	20.94	1710000000	9.23	sample	Pure culture	sample	Gp4_2
Gp4_3	S. sanguinis 0% live, 106 CFU/ml	Gp4_315	S.sanguinis dead	S.sanguinis	No	No	36.3	5240000000	9.72	sample	Pure culture	sample	Gp4_3
Gp4_4	S. sanguinis 0% live, 106 CFU/ml	Gp4_416	S.sanguinis dead	S.sanguinis	No	No	25.02	217000000000	11.3	sample	Pure culture	sample	Gp4_4
Gp5_1	both 100% live, 106 CFU/ml	Gp5_117	E.coli, S.sanguinis live	E.coli and S.sanguinis	No	No	32.4	617000000	8.79	sample	Pure culture	sample	Gp5_1	277000000000	10.81
Gp5_2	both 100% live, 106 CFU/ml	Gp5_218	E.coli, S.sanguinis live	E.coli and S.sanguinis	No	No	35.4	108000000000	11	sample	Pure culture	sample	Gp5_2
Gp5_3	both 100% live, 106 CFU/ml	Gp5_319	E.coli, S.sanguinis live	E.coli and S.sanguinis	No	No	46.2	515000000000	11.7	sample	Pure culture	sample	Gp5_3
Gp5_4	both 100% live, 106 CFU/ml	Gp5_420	E.coli, S.sanguinis live	E.coli and S.sanguinis	No	No	26.31	484000000000	11.7	sample	Pure culture	sample	Gp5_4
Gp6_1	both 0% live, 106 CFU/ml	Gp6_121	E.coli, S.sanguinis dead	E.coli and S.sanguinis	No	No	10.2	627000000000	11.8	sample	Pure culture	sample	Gp6_1	365000000000	11.34
Gp6_2	both 0% live, 106 CFU/ml	Gp6_222	E.coli, S.sanguinis dead	E.coli and S.sanguinis	No	No	7.65	613000000000	11.8	sample	Pure culture	sample	Gp6_2
Gp6_3	both 0% live, 106 CFU/ml	Gp6_323	E.coli, S.sanguinis dead	E.coli and S.sanguinis	No	No	19.5	188000000000	11.3	sample	Pure culture	sample	Gp6_3
Gp6_4	both 0% live, 106 CFU/ml	Gp6_424	E.coli, S.sanguinis dead	E.coli and S.sanguinis	No	No	13.35	31200000000	10.5	sample	Pure culture	sample	Gp6_4
Gp7_1	100% live E.coli and 50% live S. sanguinis, 106 CFU/ml	Gp7_125	E.coli live, S.sanguinis half	E.coli and S.sanguinis	No	No	37.8	738000	5.87	sample	Pure culture	sample	Gp7_1	225000000000	10.06
Gp7_2	100% live E.coli and 50% live S. sanguinis, 106 CFU/ml	Gp7_226	E.coli live, S.sanguinis half	E.coli and S.sanguinis	No	No	23.04	244000000000	11.4	sample	Pure culture	sample	Gp7_2
Gp7_3	100% live E.coli and 50% live S. sanguinis, 106 CFU/ml	Gp7_327	E.coli live, S.sanguinis half	E.coli and S.sanguinis	No	No	32.7	426000000000	11.6	sample	Pure culture	sample	Gp7_3
Gp7_4	100% live E.coli and 50% live S. sanguinis, 106 CFU/ml	Gp7_428	E.coli live, S.sanguinis half	E.coli and S.sanguinis	No	No	24.6	229000000000	11.4	sample	Pure culture	sample	Gp7_4
Gp8_1	50% live E.coli and 100% live S. sanguinis, 106 CFU/ml	Gp8_129	E.coli half, S.sanguinis live	E.coli and S.sanguinis	No	No	21.87	2070000000000	12.3	sample	Pure culture	sample	Gp8_1	653000000000	10.79
Gp8_2	50% live E.coli and 100% live S. sanguinis, 106 CFU/ml	Gp8_230	E.coli half, S.sanguinis live	E.coli and S.sanguinis	No	No	12.66	144000000	8.16	sample	Pure culture	sample	Gp8_2
Gp8_3	50% live E.coli and 100% live S. sanguinis, 106 CFU/ml	Gp8_331	E.coli half, S.sanguinis live	E.coli and S.sanguinis	No	No	33.3	423000000000	11.6	sample	Pure culture	sample	Gp8_3
Gp8_4	50% live E.coli and 100% live S. sanguinis, 106 CFU/ml	Gp8_432	E.coli half, S.sanguinis live	E.coli and S.sanguinis	No	No	19.59	118000000000	11.1	sample	Pure culture	sample	Gp8_4
Gp9_1	100% live E.coli and 0% live S. sanguinis, 106 CFU/ml	Gp9_133	E.coli live, S.sanguinis dead	E.coli and S.sanguinis	No	No	20.55	1710000000000	12.2	sample	Pure culture	sample	Gp9_1	1430000000000	11.94
Gp9_2	100% live E.coli and 0% live S. sanguinis, 106 CFU/ml	Gp9_234	E.coli live, S.sanguinis dead	E.coli and S.sanguinis	No	No	28.98	3340000000000	12.5	sample	Pure culture	sample	Gp9_2
Gp9_3	100% live E.coli and 0% live S. sanguinis, 106 CFU/ml	Gp9_335	E.coli live, S.sanguinis dead	E.coli and S.sanguinis	No	No	21.39	213000000000	11.3	sample	Pure culture	sample	Gp9_3
Gp9_4	100% live E.coli and 0% live S. sanguinis, 106 CFU/ml	Gp9_436	E.coli live, S.sanguinis dead	E.coli and S.sanguinis	No	No	25.89	459000000000	11.7	sample	Pure culture	sample	Gp9_4
Gp10_1	0% live E.coli and 100% live S. sanguinis, 106 CFU/ml	Gp10_137	E.coli dead, S.sanguinis live	E.coli and S.sanguinis	No	No	18.78	4110000	6.61	sample	Pure culture	sample	Gp10_1	74100000000	9.42
Gp10_2	0% live E.coli and 100% live S. sanguinis, 106 CFU/ml	Gp10_238	E.coli dead, S.sanguinis live	E.coli and S.sanguinis	No	No	21.63	120000000000	11.1	sample	Pure culture	sample	Gp10_2
Gp10_3	0% live E.coli and 100% live S. sanguinis, 106 CFU/ml	Gp10_339	E.coli dead, S.sanguinis live	E.coli and S.sanguinis	No	No	31.5	543000000	8.73	sample	Pure culture	sample	Gp10_3
Gp10_4	0% live E.coli and 100% live S. sanguinis, 106 CFU/ml	Gp10_440	E.coli dead, S.sanguinis live	E.coli and S.sanguinis	No	No	21.48	176000000000	11.2	sample	Pure culture	sample	Gp10_4
Gp1_1_P	E. coli 100% live, 106 CFU/ml	Gp1_1_P41	E.coli live	E.coli	Yes	No	12.21	933000000000	12	sample	Pure culture	sample	Gp1_1	305000000000	9.59
Gp1_2_P	E. coli 100% live, 106 CFU/ml	Gp1_2_P42	E.coli live	E.coli	Yes	No	17.55	12400	4.09	sample	Pure culture	sample	Gp1_2
Gp1_3_P	E. coli 100% live, 106 CFU/ml	Gp1_3_P43	E.coli live	E.coli	Yes	No	11.49	130000000000	11.1	sample	Pure culture	sample	Gp1_3
Gp1_4_P	E. coli 100% live, 106 CFU/ml	Gp1_4_P44	E.coli live	E.coli	Yes	No	14.76	156000000000	11.2	sample	Pure culture	sample	Gp1_4
Gp2_1_P	E. coli 0% live, 106 CFU/ml	Gp2_1_P45	E.coli dead	E.coli	Yes	No	<1	1250000	6.1	sample	Pure culture	sample	Gp2_1	1100000	5.64243
Gp2_2_P	E. coli 0% live, 106 CFU/ml	Gp2_2_P46	E.coli dead	E.coli	Yes	No	<1	2530000	6.4	sample	Pure culture	sample	Gp2_2
Gp2_3_P	E. coli 0% live, 106 CFU/ml	Gp2_3_P47	E.coli dead	E.coli	Yes	No	<1	19600	4.29	sample	Pure culture	sample	Gp2_3
Gp2_4_P	E. coli 0% live, 106 CFU/ml	Gp2_4_P48	E.coli dead	E.coli	Yes	No	<1	599000	5.78	sample	Pure culture	sample	Gp2_4
Gp3_1_P	S. sanguinis 100% live, 106 CFU/ml	Gp3_1_P49	S.sanguinis live	S.sanguinis	Yes	No	11.73	1010000000000	12	sample	Pure culture	sample	Gp3_1	357000000000	10.44
Gp3_2_P	S. sanguinis 100% live, 106 CFU/ml	Gp3_2_P50	S.sanguinis live	S.sanguinis	Yes	No	13.14	14600000	7.16	sample	Pure culture	sample	Gp3_2
Gp3_3_P	S. sanguinis 100% live, 106 CFU/ml	Gp3_3_P51	S.sanguinis live	S.sanguinis	Yes	No	17.73	148000000000	11.2	sample	Pure culture	sample	Gp3_3
Gp3_4_P	S. sanguinis 100% live, 106 CFU/ml	Gp3_4_P52	S.sanguinis live	S.sanguinis	Yes	No	28.8	270000000000	11.4	sample	Pure culture	sample	Gp3_4
Gp4_1_P	S. sanguinis 0% live, 106 CFU/ml	Gp4_1_P53	S.sanguinis dead	S.sanguinis	Yes	No	<1	24700000	7.39	sample	Pure culture	sample	Gp4_1	24100000	7.32
Gp4_2_P	S. sanguinis 0% live, 106 CFU/ml	Gp4_2_P54	S.sanguinis dead	S.sanguinis	Yes	No	<1	8260000	6.92	sample	Pure culture	sample	Gp4_2
Gp4_3_P	S. sanguinis 0% live, 106 CFU/ml	Gp4_3_P55	S.sanguinis dead	S.sanguinis	Yes	No	<1	24100000	7.38	sample	Pure culture	sample	Gp4_3
Gp4_4_P	S. sanguinis 0% live, 106 CFU/ml	Gp4_4_P56	S.sanguinis dead	S.sanguinis	Yes	No	<1	39400000	7.6	sample	Pure culture	sample	Gp4_4
Gp5_1_P	both 100% live, 106 CFU/ml	Gp5_1_P57	E.coli, S.sanguinis live	E.coli and S.sanguinis	Yes	No	6.63	501000000000	11.7	sample	Pure culture	sample	Gp5_1	478000000000	8.77
Gp5_2_P	both 100% live, 106 CFU/ml	Gp5_2_P58	E.coli, S.sanguinis live	E.coli and S.sanguinis	Yes	No	16.23	1410000000000	12.1	sample	Pure culture	sample	Gp5_2
Gp5_3_P	both 100% live, 106 CFU/ml	Gp5_3_P59	E.coli, S.sanguinis live	E.coli and S.sanguinis	Yes	No	19.02	18300000	7.26	sample	Pure culture	sample	Gp5_3
Gp5_4_P	both 100% live, 106 CFU/ml	Gp5_4_P60	E.coli, S.sanguinis live	E.coli and S.sanguinis	Yes	No	22.2	9050	3.96	sample	Pure culture	sample	Gp5_4
Gp6_1_P	both 0% live, 106 CFU/ml	Gp6_1_P61	E.coli, S.sanguinis dead	E.coli and S.sanguinis	Yes	No	<1	5000000	6.7	sample	Pure culture	sample	Gp6_1	18300000	6.82
Gp6_2_P	both 0% live, 106 CFU/ml	Gp6_2_P62	E.coli, S.sanguinis dead	E.coli and S.sanguinis	Yes	No	<1	62100000	7.79	sample	Pure culture	sample	Gp6_2
Gp6_3_P	both 0% live, 106 CFU/ml	Gp6_3_P63	E.coli, S.sanguinis dead	E.coli and S.sanguinis	Yes	No	<1	1350000	6.13	sample	Pure culture	sample	Gp6_3
Gp6_4_P	both 0% live, 106 CFU/ml	Gp6_4_P64	E.coli, S.sanguinis dead	E.coli and S.sanguinis	Yes	No	<1	4650000	6.67	sample	Pure culture	sample	Gp6_4
Gp7_1_P	100% live E.coli and 50% live S. sanguinis, 106 CFU/ml	Gp7_1_P65	E.coli live, S.sanguinis half	E.coli and S.sanguinis	Yes	No	3.24	150000000000	11.2	sample	Pure culture	sample	Gp7_1	146000000000	11.15
Gp7_2_P	100% live E.coli and 50% live S. sanguinis, 106 CFU/ml	Gp7_2_P66	E.coli live, S.sanguinis half	E.coli and S.sanguinis	Yes	No	8.25	206000000000	11.3	sample	Pure culture	sample	Gp7_2
Gp7_3_P	100% live E.coli and 50% live S. sanguinis, 106 CFU/ml	Gp7_3_P67	E.coli live, S.sanguinis half	E.coli and S.sanguinis	Yes	No	10.08	97600000000	11	sample	Pure culture	sample	Gp7_3
Gp7_4_P	100% live E.coli and 50% live S. sanguinis, 106 CFU/ml	Gp7_4_P68	E.coli live, S.sanguinis half	E.coli and S.sanguinis	Yes	No	15.84	132000000000	11.1	sample	Pure culture	sample	Gp7_4
Gp8_1_P	50% live E.coli and 100% live S. sanguinis, 106 CFU/ml	Gp8_1_P69	E.coli half, S.sanguinis live	E.coli and S.sanguinis	Yes	No	3.6	187000000000	11.3	sample	Pure culture	sample	Gp8_1	318000000000	11.3
Gp8_2_P	50% live E.coli and 100% live S. sanguinis, 106 CFU/ml	Gp8_2_P70	E.coli half, S.sanguinis live	E.coli and S.sanguinis	Yes	No	10.38	892000000000	12	sample	Pure culture	sample	Gp8_2
Gp8_3_P	50% live E.coli and 100% live S. sanguinis, 106 CFU/ml	Gp8_3_P71	E.coli half, S.sanguinis live	E.coli and S.sanguinis	Yes	No	10.62	83300000000	10.9	sample	Pure culture	sample	Gp8_3
Gp8_4_P	50% live E.coli and 100% live S. sanguinis, 106 CFU/ml	Gp8_4_P72	E.coli half, S.sanguinis live	E.coli and S.sanguinis	Yes	No	10.17	109000000000	11	sample	Pure culture	sample	Gp8_4
Gp9_1_P	100% live E.coli and 0% live S. sanguinis, 106 CFU/ml	Gp9_1_P73	E.coli live, S.sanguinis dead	E.coli and S.sanguinis	Yes	No	4.29	217000	5.34	sample	Pure culture	sample	Gp9_1	87800000000	7.79
Gp9_2_P	100% live E.coli and 0% live S. sanguinis, 106 CFU/ml	Gp9_2_P74	E.coli live, S.sanguinis dead	E.coli and S.sanguinis	Yes	No	4.59	296000000000	11.5	sample	Pure culture	sample	Gp9_2
Gp9_3_P	100% live E.coli and 0% live S. sanguinis, 106 CFU/ml	Gp9_3_P75	E.coli live, S.sanguinis dead	E.coli and S.sanguinis	Yes	No	6.33	4010	3.6	sample	Pure culture	sample	Gp9_3
Gp9_4_P	100% live E.coli and 0% live S. sanguinis, 106 CFU/ml	Gp9_4_P76	E.coli live, S.sanguinis dead	E.coli and S.sanguinis	Yes	No	6.42	55400000000	10.7	sample	Pure culture	sample	Gp9_4
Gp10_1_P	0% live E.coli and 100% live S. sanguinis, 106 CFU/ml	Gp10_1_P77	E.coli dead, S.sanguinis live	E.coli and S.sanguinis	Yes	No	3.48	11100000000	10	sample	Pure culture	sample	Gp10_1	112000000000	9.02
Gp10_2_P	0% live E.coli and 100% live S. sanguinis, 106 CFU/ml	Gp10_2_P78	E.coli dead, S.sanguinis live	E.coli and S.sanguinis	Yes	No	7.35	371000000000	11.6	sample	Pure culture	sample	Gp10_2
Gp10_3_P	0% live E.coli and 100% live S. sanguinis, 106 CFU/ml	Gp10_3_P79	E.coli dead, S.sanguinis live	E.coli and S.sanguinis	Yes	No	8.61	4580	3.66	sample	Pure culture	sample	Gp10_3
Gp10_4_P	0% live E.coli and 100% live S. sanguinis, 106 CFU/ml	Gp10_4_P80	E.coli dead, S.sanguinis live	E.coli and S.sanguinis	Yes	No	8.28	64800000000	10.8	sample	Pure culture	sample	Gp10_4
Screen_1	Room412B, Yan's computer screen	Screen_181	computer1	computer screen	No	No	<1	4920000	6.69	sample	Biomass tests	sample	Screen_1	74600000	6.09
Screen_2	Room412B, Yancong's computer screen	Screen_282	computer2	computer screen	No	No	<1	292000000	8.47	sample	Biomass tests	sample	Screen_2
Screen_3	Room412B, Kelsey's computer screen	Screen_383	computer3	computer screen	No	No	<1	1430000	6.16	sample	Biomass tests	sample	Screen_3
Screen_4	Room412B, Siyuan's computer screen	Screen_484	computer4	computer screen	No	No	<1	1070	3.03	sample	Biomass tests	sample	Screen_4
Mouse_1	677 Huntingtun, 1F, left	Mouse_185	computer mouse left	computer mouse	No	No	<1	182000000	8.26	sample	Biomass tests	sample	Mouse_1	54400000	5.96
Mouse_2	677 Huntingtun, 1F, right	Mouse_286	computer mouse right	computer mouse	No	No	<1	31700	4.5	sample	Biomass tests	sample	Mouse_2
Mouse_3	677 Huntingtun, 2F, mid	Mouse_387	computer mouse mid	computer mouse	No	No	<1	36000000	7.56	sample	Biomass tests	sample	Mouse_3
Mouse_4	677 Huntingtun, Building1, 9F, qPCR	Mouse_488	computer mouse 9F	computer mouse	No	No	<1	3310	3.52	sample	Biomass tests	sample	Mouse_4
Soil_1	677 Huntingtun Ave, flower bed soil 1	Soil_189	soil1	soil	No	No	Not available	1890000000000	12.3	sample	Biomass tests	sample	Soil_1	500000000000	10.6
Soil_2	677 Huntingtun Ave, flower bed soil 1	Soil_290	soil2	soil	No	No	41.4	Not available	Not available	sample	Biomass tests	sample	Soil_2
Soil_3	677 Huntingtun Ave, flower bed soil 1	Soil_391	soil3	soil	No	No	32.4	269000000	8.43	sample	Biomass tests	sample	Soil_3
Soil_4	677 Huntingtun Ave, flower bed soil 1	Soil_492	soil4	soil	No	No	75.6	111000000000	11	sample	Biomass tests	sample	Soil_4
Saliva_1	Lea's tongue swab	Saliva_193	saliva1	saliva	No	No	83.7	161000000000	11.2	sample	Biomass tests	sample	Saliva_1	40300000000	6.39
Saliva_2	TCC's tongue swab	Saliva_294	saliva2	saliva	No	No	3.48	84700	4.93	sample	Biomass tests	sample	Saliva_2
Saliva_3	Yancong's tongue swab	Saliva_395	saliva3	saliva	No	No	3.68	278000	5.44	sample	Biomass tests	sample	Saliva_3
Saliva_4	Siyuan's tongue swab	Saliva_496	saliva4	saliva	No	No	19.89	9540	3.98	sample	Biomass tests	sample	Saliva_4
Screen_1_P	Room412B, Yan's computer screen	Screen_1_P97	computer1	computer screen	Yes	No	<1	706000	5.85	sample	Biomass tests	sample	Screen_1	5720000000	6.71
Screen_2_P	Room412B, Yancong's computer screen	Screen_2_P98	computer2	computer screen	Yes	No	<1	190000	5.28	sample	Biomass tests	sample	Screen_2	5.49333
Screen_3_P	Room412B, Kelsey's computer screen	Screen_3_P99	computer3	computer screen	Yes	No	<1	223000	5.35	sample	Biomass tests	sample	Screen_3
Screen_4_P	Room412B, Siyuan's computer screen	Screen_4_P100	computer4	computer screen	Yes	No	<1	22900000000	10.4	sample	Biomass tests	sample	Screen_4
Mouse_1_P	677 Huntingtun, 1F, left	Mouse_1_P101	computer mouse left	computer mouse	Yes	No	<1	1860000	6.27	sample	Biomass tests	sample	Mouse_1	1540000	6.01
Mouse_2_P	677 Huntingtun, 1F, right	Mouse_2_P102	computer mouse right	computer mouse	Yes	No	<1	3470000	6.54	sample	Biomass tests	sample	Mouse_2	6.01
Mouse_3_P	677 Huntingtun, 2F, mid	Mouse_3_P103	computer mouse mid	computer mouse	Yes	No	<1	402000	5.6	sample	Biomass tests	sample	Mouse_3
Mouse_4_P	677 Huntingtun, Building1, 9F, qPCR	Mouse_4_P104	computer mouse 9F	computer mouse	Yes	No	<1	414000	5.62	sample	Biomass tests	sample	Mouse_4
Soil_1_P	677 Huntingtun Ave, flower bed soil 1	Soil_1_P105	soil1	soil	Yes	No	Not available	Not available	Not available	sample	Biomass tests	sample	Soil_1	456000000000	7.76108
Soil_2_P	677 Huntingtun Ave, flower bed soil 1	Soil_2_P106	soil2	soil	Yes	No	16.62	71700000	7.86	sample	Biomass tests	sample	Soil_2
Soil_3_P	677 Huntingtun Ave, flower bed soil 1	Soil_3_P107	soil3	soil	Yes	No	22.32	6940000	6.84	sample	Biomass tests	sample	Soil_3
Soil_4_P	677 Huntingtun Ave, flower bed soil 1	Soil_4_P108	soil4	soil	Yes	No	54	387000000	8.59	sample	Biomass tests	sample	Soil_4
Saliva_1_P	Lea's tongue swab	Saliva_1_P109	saliva1	saliva	Yes	No	1.95	48200000000	10.7	sample	Biomass tests	sample	Saliva_1	12000000000	5.89
Saliva_2_P	TCC's tongue swab	Saliva_2_P110	saliva2	saliva	Yes	No	<1	24600	4.39	sample	Biomass tests	sample	Saliva_2
Saliva_3_P	Yancong's tongue swab	Saliva_3_P111	saliva3	saliva	Yes	No	<1	33200	4.52	sample	Biomass tests	sample	Saliva_3
Saliva_4_P	Siyuan's tongue swab	Saliva_4_P112	saliva4	saliva	Yes	No	<1	9160	3.96	sample	Biomass tests	sample	Saliva_4
Spike_Screen_1	Room412B, Yan's computer screen	Spike_Screen_1113	computer1	computer screen	No	Yes	<1	75500000	7.88	sample	Biomass tests	sample	Spike_Screen_1	53300000	6.98
Spike_Screen_2	Room412B, Yancong's computer screen	Spike_Screen_2114	computer2	computer screen	No	Yes	3.6	26700	4.43	sample	Biomass tests	sample	Spike_Screen_2
Spike_Screen_3	Room412B, Kelsey's computer screen	Spike_Screen_3115	computer3	computer screen	No	Yes	<1	92000000	7.96	sample	Biomass tests	sample	Spike_Screen_3
Spike_Screen_4	Room412B, Siyuan's computer screen	Spike_Screen_4116	computer4	computer screen	No	Yes	<1	45500000	7.66	sample	Biomass tests	sample	Spike_Screen_4
Spike_Mouse_1	677 Huntingtun, 1F, left	Spike_Mouse_1117	computer mouse left	computer mouse	No	Yes	<1	444000000	8.65	sample	Biomass tests	sample	Spike_Mouse_1	144000000	7.05
Spike_Mouse_2	677 Huntingtun, 1F, right	Spike_Mouse_2118	computer mouse right	computer mouse	No	Yes	<1	19300	4.29	sample	Biomass tests	sample	Spike_Mouse_2
Spike_Mouse_3	677 Huntingtun, 2F, mid	Spike_Mouse_3119	computer mouse mid	computer mouse	No	Yes	<1	118000000	8.07	sample	Biomass tests	sample	Spike_Mouse_3
Spike_Mouse_4	677 Huntingtun, Building1, 9F, qPCR	Spike_Mouse_4120	computer mouse 9F	computer mouse	No	Yes	<1	15100000	7.18	sample	Biomass tests	sample	Spike_Mouse_4
Spike_Soil_1	677 Huntingtun Ave, flower bed soil 1	Spike_Soil_1121	soil1	soil	No	Yes	Not available	2610000000000	12.4	sample	Biomass tests	sample	Spike_Soil_1	734000000000	11.6
Spike_Soil_2	678 Huntingtun Ave, flower bed soil 2	Spike_Soil_2122	soil2	soil	No	Yes	31.1	Not available	Not available	sample	Biomass tests	sample	Spike_Soil_2
Spike_Soil_3	679 Huntingtun Ave, flower bed soil 3	Spike_Soil_3123	soil3	soil	No	Yes	46.2	158000000000	11.2	sample	Biomass tests	sample	Spike_Soil_3
Spike_Soil_4	680 Huntingtun Ave, flower bed soil 4	Spike_Soil_4124	soil4	soil	No	Yes	66.6	166000000000	11.2	sample	Biomass tests	sample	Spike_Soil_4
Spike_Saliva_1	Lea's tongue swab	Spike_Saliva_1125	saliva1	saliva	No	Yes	Not available	331000000000	11.5	sample	Biomass tests	sample	Spike_Saliva_1	87100000000	8.72
Spike_Saliva_2	TCC's tongue swab	Spike_Saliva_2126	saliva2	saliva	No	Yes	8.4	15200000000	10.2	sample	Biomass tests	sample	Spike_Saliva_2
Spike_Saliva_3	Yancong's tongue swab	Spike_Saliva_3127	saliva3	saliva	No	Yes	6.16	7380	3.87	sample	Biomass tests	sample	Spike_Saliva_3
Spike_Saliva_4	Siyuan's tongue swab	Spike_Saliva_4128	saliva4	saliva	No	Yes	14.28	2010000000	9.3	sample	Biomass tests	sample	Spike_Saliva_4
Spike_Screen_1_P	Room412B, Yan's computer screen	Spike_Screen_1_P129	computer1	computer screen	Yes	Yes	<1	3110	3.49	sample	Biomass tests	sample	Spike_Screen_1	180000	4.36
Spike_Screen_2_P	Room412B, Yancong's computer screen	Spike_Screen_2_P130	computer2	computer screen	Yes	Yes	<1	22800	4.36	sample	Biomass tests	sample	Spike_Screen_2	4.36
Spike_Screen_3_P	Room412B, Kelsey's computer screen	Spike_Screen_3_P131	computer3	computer screen	Yes	Yes	<1	5610	3.75	sample	Biomass tests	sample	Spike_Screen_3
Spike_Screen_4_P	Room412B, Siyuan's computer screen	Spike_Screen_4_P132	computer4	computer screen	Yes	Yes	<1	687000	5.84	sample	Biomass tests	sample	Spike_Screen_4
Spike_Mouse_1_P	677 Huntingtun, 1F, left	Spike_Mouse_1_P133	computer mouse left	computer mouse	Yes	Yes	<1	158000000	8.2	sample	Biomass tests	sample	Spike_Mouse_1	41500000	5.72
Spike_Mouse_2_P	677 Huntingtun, 1F, right	Spike_Mouse_2_P134	computer mouse right	computer mouse	Yes	Yes	<1	20500	4.31	sample	Biomass tests	sample	Spike_Mouse_2
Spike_Mouse_3_P	677 Huntingtun, 2F, mid	Spike_Mouse_3_P135	computer mouse mid	computer mouse	Yes	Yes	<1	2850	3.45	sample	Biomass tests	sample	Spike_Mouse_3
Spike_Mouse_4_P	677 Huntingtun, Building1, 9F, qPCR	Spike_Mouse_4_P136	computer mouse 9F	computer mouse	Yes	Yes	<1	8450000	6.93	sample	Biomass tests	sample	Spike_Mouse_4
Spike_Soil_1_P	677 Huntingtun Ave, flower bed soil 1	Spike_Soil_1_P137	soil1	soil	Yes	Yes	Not available	44400000000	10.65	sample	Biomass tests	sample	Spike_Soil_1	27800000000	10.6825
Spike_Soil_2_P	678 Huntingtun Ave, flower bed soil 2	Spike_Soil_2_P138	soil2	soil	Yes	Yes	17.35	67100000000	10.8	sample	Biomass tests	sample	Spike_Soil_2
Spike_Soil_3_P	679 Huntingtun Ave, flower bed soil 3	Spike_Soil_3_P139	soil3	soil	Yes	Yes	23.7	Not available	Not available	sample	Biomass tests	sample	Spike_Soil_3
Spike_Soil_4_P	680 Huntingtun Ave, flower bed soil 4	Spike_Soil_4_P140	soil4	soil	Yes	Yes	47.1	39700000000	10.6	sample	Biomass tests	sample	Spike_Soil_4
Spike_Saliva_1_P	Lea's tongue swab	Spike_Saliva_1_P141	saliva1	saliva	Yes	Yes	2.85	90500000000	11	sample	Biomass tests	sample	Spike_Saliva_1	26900000000	8.69
Spike_Saliva_2_P	TCC's tongue swab	Spike_Saliva_2_P142	saliva2	saliva	Yes	Yes	<1	127000	5.1	sample	Biomass tests	sample	Spike_Saliva_2
Spike_Saliva_3_P	Yancong's tongue swab	Spike_Saliva_3_P143	saliva3	saliva	Yes	Yes	<1	288000000	8.46	sample	Biomass tests	sample	Spike_Saliva_3
Spike_Saliva_4_P	Siyuan's tongue swab	Spike_Saliva_4_P144	saliva4	saliva	Yes	Yes	4.5	16900000000	10.2	sample	Biomass tests	sample	Spike_Saliva_4
145-t1	MBTA_touchscreen_1	145_t1145	MBTA_touchscreen_1	MBTA touchscreen	No	No	1.62	Not available	Not available	sample	MBTA	sample	t1	Not available	Not available
146-t2	MBTA_touchscreen_2	146_t2146	MBTA_touchscreen_2	MBTA touchscreen	No	No	3.54	Not available	Not available	sample	MBTA	sample	t2
147-t3	MBTA_touchscreen_3	147_t3147	MBTA_touchscreen_3	MBTA touchscreen	No	No	2.4	Not available	Not available	sample	MBTA	sample	t3
148-t4	MBTA_touchscreen_4	148_t4148	MBTA_touchscreen_4	MBTA touchscreen	No	No	2.67	Not available	Not available	sample	MBTA	sample	t4
149-g1	MBTA_grib_1	149_g1149	MBTA_grib_1	MBTA grip	No	No	4.14	Not available	Not available	sample	MBTA	sample	g1	Not available	Not available
150-g2	MBTA_grib_2	150_g2150	MBTA_grib_2	MBTA grip	No	No	<1	Not available	Not available	sample	MBTA	sample	g2
151-g3	MBTA_grib_3	151_g3151	MBTA_grib_3	MBTA grip	No	No	3.75	Not available	Not available	sample	MBTA	sample	g3
152-g4	MBTA_grib_4	152_g4152	MBTA_grib_4	MBTA grip	No	No	<1	Not available	Not available	sample	MBTA	sample	g4
153-s1	MBTA_seat_1	153_s1153	MBTA_seat_1	MBTA seat	No	No	<1	Not available	Not available	sample	MBTA	sample	s1	Not available	Not available
154-s2	MBTA_seat_2	154_s2154	MBTA_seat_2	MBTA seat	No	No	<1	Not available	Not available	sample	MBTA	sample	s2
155-s3	MBTA_seat_3	155_s3155	MBTA_seat_3	MBTA seat	No	No	<1	Not available	Not available	sample	MBTA	sample	s3
156-s4	MBTA_seat_4	Missed	MBTA_seat_4	MBTA seat	No	No	<1	Not available	Not available	sample	MBTA	sample	s4
157-w1	MBTA_wall_1	157_w1157	MBTA_wall_1	MBTA wall	No	No	<1	Not available	Not available	sample	MBTA	sample	w1	Not available	Not available
158-w2	MBTA_wall_2	158_w2158	MBTA_wall_2	MBTA wall	No	No	<1	Not available	Not available	sample	MBTA	sample	w2
159-w3	MBTA_wall_3	159_w3159	MBTA_wall_3	MBTA wall	No	No	<1	Not available	Not available	sample	MBTA	sample	w3
160-w4	MBTA_wall_4	160_w4160	MBTA_wall_4	MBTA wall	No	No	<1	Not available	Not available	sample	MBTA	sample	w4
161-t1	MBTA_touchscreen_1_P	161_t1161	MBTA_touchscreen_1_P	MBTA touchscreen	Yes	No	<1	Not available	Not available	sample	MBTA	sample	t1	Not available	Not available
162-t2	MBTA_touchscreen_2_P	162_t2162	MBTA_touchscreen_2_P	MBTA touchscreen	Yes	No	<1	Not available	Not available	sample	MBTA	sample	t2
163-t3	MBTA_touchscreen_3_P	163_t3163	MBTA_touchscreen_3_P	MBTA touchscreen	Yes	No	<1	Not available	Not available	sample	MBTA	sample	t3
164-t4	MBTA_touchscreen_4_P	164_t4164	MBTA_touchscreen_4_P	MBTA touchscreen	Yes	No	<1	Not available	Not available	sample	MBTA	sample	t4
165-g1	MBTA_grib_1_P	165_g1165	MBTA_grib_1_P	MBTA grip	Yes	No	1.74	Not available	Not available	sample	MBTA	sample	g1	Not available	Not available
166-g2	MBTA_grib_2_P	166_g2166	MBTA_grib_2_P	MBTA grip	Yes	No	5.34	Not available	Not available	sample	MBTA	sample	g2
167-g3	MBTA_grib_3_P	167_g3167	MBTA_grib_3_P	MBTA grip	Yes	No	<1	Not available	Not available	sample	MBTA	sample	g3
168-g4	MBTA_grib_4_P	168_g4168	MBTA_grib_4_P	MBTA grip	Yes	No	<1	Not available	Not available	sample	MBTA	sample	g4
169-s1	MBTA_seat_1_P	169_s1169	MBTA_seat_1_P	MBTA seat	Yes	No	<1	Not available	Not available	sample	MBTA	sample	s1	Not available	Not available
170-s2	MBTA_seat_2_P	170_s2170	MBTA_seat_2_P	MBTA seat	Yes	No	<1	Not available	Not available	sample	MBTA	sample	s2
171-s3	MBTA_seat_3_P	171_s3171	MBTA_seat_3_P	MBTA seat	Yes	No	<1	Not available	Not available	sample	MBTA	sample	s3
172-s4	MBTA_seat_4_P	172_s4172	MBTA_seat_4_P	MBTA seat	Yes	No	<1	Not available	Not available	sample	MBTA	sample	s4
173-w1	MBTA_wall_1_P	173_w1173	MBTA_wall_1_P	MBTA wall	Yes	No	<1	Not available	Not available	sample	MBTA	sample	w1	Not available	Not available
174-w2	MBTA_wall_2_P	174_w2174	MBTA_wall_2_P	MBTA wall	Yes	No	<1	Not available	Not available	sample	MBTA	sample	w2
175-w3	MBTA_wall_3_P	Missed	MBTA_wall_3_P	MBTA wall	Yes	No	<1	Not available	Not available	sample	MBTA	sample	w3
176-w4	MBTA_wall_4_P	176_w4176	MBTA_wall_4_P	MBTA wall	Yes	No	<1	Not available	Not available	sample	MBTA	sample	w4
PMA_bk_1	blank PMA reagent control	PMA_bk_1177	blank PMA reagent control	control	No	No	<1	Not available	Not available	control	control	control		Not available	Not available
PMA_bk_2	blank PMA reagent control	PMA_bk_2178	blank PMA reagent control	control	No	No	<1	Not available	Not available	control	control	control		Not available	Not available
Air_MBTA_1	Air_MBTA_1	Air_MBTA_1179	Air MBTA 1	control	No	No	<1	Not available	Not available	control	control	control		Not available	Not available
PMA_50_1	50 PMA reagent control	PMA_50_1180	50 PMA reagent control	control	No	No	<1	Not available	Not available	control	control	control		Not available	Not available
Broth_1	Plain BHI control	Broth_1181	Plain BHI control	control	No	No	<1	Not available	Not available	control	control	control		Not available	Not available
Air_MBTA_2	Air MBTA 2	Air_MBTA_2182	Air MBTA 2	control	No	No	<1	Not available	Not available	control	control	control		Not available	Not available
Air_outdoor	677 Huntingtun Ave, air control	Air_outdoor183	678 Huntingtun Ave, air control	control	No	No	<1	Not available	Not available	control	control	control		Not available	Not available
Air_Screen	Lab412B, air control	Air_Screen184	Lab412B air control	control	No	No	<1	Not available	Not available	control	control	control		Not available	Not available
Air_Saliva	Lab412B, air control	Air_Saliva185	Lab412B air control	control	No	No	<1	Not available	Not available	control	control	control		Not available	Not available
Air_mouse	Lab412B, air control	Air_mouse186	Lab412B air control	control	No	No	<1	Not available	Not available	control	control	control		Not available	Not available
Air_MBTA_3	Air MBTA 3	Air_MBTA_3187	Air MBTA 3	control	No	No	<1	Not available	Not available	control	control	control		Not available	Not available
PCR_bk_2	PCR reagent control	PCR_bk_2188	PCR reagent control	control	No	No	<1	Not available	Not available	control	control	control		Not available	Not available
C6_1	DNA elution buffer	C6_1189	DNA elution buffer	control	No	No	<1	Not available	Not available	control	control	control		Not available	Not available
Air_MBTA_4	Air MBTA 4	Air_MBTA_4190	Air MBTA 4	control	No	No	<1	Not available	Not available	control	control	control		Not available	Not available
Saline_outdoor	plain saline control	Saline_outdoor191	plain saline control	control	No	No	<1	Not available	Not available	control	control	control		Not available	Not available
Saline_screen	plain saline control	Saline_screen192	plain saline control	control	No	No	<1	Not available	Not available	control	control	control		Not available	Not available
