# Supplementary material for: Whole microbial community viability is not quantitatively reflected by propidium monoazide sequencing approach
Source: Microbiome. 2021 Jan 21;9:17. doi: 10.1186/s40168-020-00961-3 (PMC7819323; doi:10.1186/s40168-020-00961-3)
Supplement: Supplementary file 5 — Additional file 4. PERMANOVA FDR adjusted. [file 40168_2020_961_MOESM5_ESM.xlsx]

## Sheet: Adonis_all
Part1: Univariate tests on Bray-Curtis dissimilarity of all samples in this study (n=190)
	P-Value	R2	p_adj
Sample type	0.001	0.570207	0.002
PMA treatment	0.105	0.00930493	0.105
Experiment	0.001	0.246238	0.002

## Sheet: Adonis_part2
Part2: Univariate tests on Bray-Curtis dissimilarity of complex community samples with/without E.coli spike in (n=64)
	P-Value	R2	p_adj
Sample type	0.001	0.464761	0.0015
PMA treatment	0.067	0.0325348	0.067
Spike-in	0.001	0.0879406	0.0015

## Sheet: Adonis_part3
Part3: Univariate tests on Bray-Curtis dissimilarity of Subway samples (n=24)
	P-Value	R2	p_adj
Sample type	0.001	0.378027	0.002
PMA treatment	0.025	0.0849612	0.025
