# Supplementary material for: Whole microbial community viability is not quantitatively reflected by propidium monoazide sequencing approach
Source: Microbiome. 2021 Jan 21;9:17. doi: 10.1186/s40168-020-00961-3 (PMC7819323; doi:10.1186/s40168-020-00961-3)
Supplement: Supplementary file 6 — Additional file 5. Metadata. [file 40168_2020_961_MOESM6_ESM.xlsx]

## Sheet: Diff_sig_Part3
metadata	feature	value	coef	stderr	N	N.not.0	pval	qval
Collection	g__Polaromonas	computer mice	-0.0010246	0.00012162	80	38	2.24e-12	1.51e-09
Collection	f__Chitinophagaceae	computer mice	-0.0147987	0.00270333	80	48	5.91e-07	3.73e-05
Collection	f__Enterobacteriaceae	computer mice	0.208613	0.0384119	80	79	7.02e-07	4.3e-05
Collection	o__Myxococcales	computer mice	-0.0055838	0.0010462	80	37	1.02e-06	5.89e-05
Collection	f__Micromonosporaceae	computer mice	-0.0002834	5.37e-05	80	32	1.28e-06	7e-05
Collection	o__Acidimicrobiales	computer mice	-0.0013792	0.00026879	80	30	2.29e-06	0.00010535
Collection	f__Haliangiaceae	computer mice	-0.0003654	8.08e-05	80	20	2.34e-05	0.00089399
Collection	g__Mycetocola	computer mice	-0.0004574	0.00010371	80	34	3.49e-05	0.00121604
Collection	o__MIZ46	computer mice	-0.001059	0.00024101	80	29	3.71e-05	0.00125619
Collection	g__Gemmata	computer mice	-0.0010314	0.00023644	80	18	4.16e-05	0.00133622
Collection	o__Ellin329	computer mice	-0.0016284	0.00037683	80	22	4.82e-05	0.0014774
Collection	o__Rhizobiales	computer mice	-0.0018749	0.00043677	80	42	5.35e-05	0.00159078
Collection	f__S24-7	computer mice	0.00279437	0.00066891	80	41	8.06e-05	0.00220347
Collection	g__Microbacterium	computer mice	-0.000166	4.02e-05	80	27	9.39e-05	0.00234359
Collection	o__Solibacterales	computer mice	-0.0015045	0.00037279	80	28	0.0001326	0.00290314
Collection	f__Lachnospiraceae	computer mice	-0.0017093	0.00043428	80	54	0.00018725	0.00386348
Collection	g__Bdellovibrio	computer mice	-0.0007269	0.00019094	80	22	0.00029038	0.00562391
Collection	g__Phenylobacterium	computer mice	-0.0006396	0.00016796	80	25	0.00028918	0.00562391
Collection	g__Candidatus Solibacter	computer mice	-0.001042	0.00027537	80	25	0.0003137	0.00598398
Collection	o__BD7-3	computer mice	-0.0001402	3.91e-05	80	17	0.00060431	0.0103063
Collection	f__C111	computer mice	-0.0004807	0.00013772	80	22	0.00082196	0.0128916
Collection	g__Pedobacter	computer mice	-0.0005604	0.00016057	80	27	0.00082246	0.0128916
Collection	g__Pseudomonas	computer mice	0.00899411	0.00261357	80	73	0.00096123	0.0145131
Collection	c__Alphaproteobacteria	computer mice	-0.0017963	0.00052316	80	36	0.00098491	0.0147517
Collection	f__Nocardioidaceae	computer mice	-0.0020987	0.00061285	80	52	0.001014	0.0149658
Collection	o__Solirubrobacterales	computer mice	-0.0028531	0.00083815	80	43	0.00108149	0.015509
Collection	f__Micrococcaceae	computer mice	-0.0016207	0.00048254	80	46	0.00124714	0.0173912
Collection	f__Myxococcaceae	computer mice	-0.0001944	5.86e-05	80	17	0.00142582	0.0192201
Collection	o__Ellin6067	computer mice	-0.0011789	0.00036175	80	25	0.00170008	0.0220356
Collection	g__Alloiococcus	computer mice	0.00057876	0.0001778	80	16	0.00171943	0.022121
Collection	g__Thermus	computer mice	0.00114464	0.00035183	80	41	0.00172855	0.022121
Collection	c__Ellin6529	computer mice	-0.0007598	0.00023626	80	30	0.00193965	0.0237014
Collection	f__Erysipelotrichaceae	computer mice	-0.0001703	5.3e-05	80	13	0.0019607	0.0237397
Collection	g__Hyphomicrobium	computer mice	-0.0011161	0.00034814	80	24	0.00199806	0.0239058
Collection	g__Ramlibacter	computer mice	-0.0014022	0.00043726	80	40	0.0019933	0.0239058
Collection	f__Solirubrobacteraceae	computer mice	-0.0006918	0.00021714	80	27	0.00212514	0.0248383
Collection	f__Sporichthyaceae	computer mice	-0.0003419	0.00010906	80	27	0.00247386	0.0269339
Collection	o__WD2101	computer mice	-0.0016886	0.00053979	80	28	0.00252681	0.0273219
Collection	g__Treponema	computer mice	-0.0009736	0.00031205	80	19	0.00259063	0.0277157
Collection	f__Ellin6075	computer mice	-0.0042328	0.00136379	80	43	0.00271891	0.0286335
Collection	f__AK1AB1_02E	computer mice	-6.86e-05	2.21e-05	80	16	0.00274705	0.02878
Collection	g__Arthrobacter	computer mice	-0.0001876	6.1e-05	80	25	0.00294489	0.0294927
Collection	g__Rheinheimera	computer mice	0.00042211	0.0001372	80	11	0.00294635	0.0294927
Collection	o__DS-18	computer mice	-0.0002989	9.7e-05	80	15	0.00292071	0.0294927
Collection	o__OPB54	computer mice	-0.0005486	0.00017821	80	33	0.00293254	0.0294927
Collection	f__Sphingobacteriaceae	computer mice	-0.0030884	0.00101126	80	26	0.00315043	0.0309232
Collection	g__Aeromicrobium	computer mice	-0.0002263	7.44e-05	80	25	0.00328156	0.0315124
Collection	p__WPS-2	computer mice	-0.0003359	0.0001105	80	21	0.00328838	0.0315124
Collection	g__Blastococcus	computer mice	-0.0002971	9.89e-05	80	27	0.00364635	0.0342927
Collection	g__Kaistobacter	computer mice	-0.0003615	0.00012088	80	34	0.00379471	0.0353206
Collection	o__SC-I-84	computer mice	-0.001428	0.00047769	80	23	0.00380806	0.0353206
Collection	g__Nocardioides	computer mice	-0.0005131	0.0001738	80	31	0.00423871	0.038262
Collection	g__Terracoccus	computer mice	-0.0002512	8.62e-05	80	31	0.00471426	0.0409108
Collection	f__Legionellaceae	computer mice	-0.0001096	3.76e-05	80	17	0.00477905	0.0410793
Collection	f__Pirellulaceae	computer mice	-0.0012486	0.000435	80	25	0.0053607	0.0441011
Collection	g__Roseomonas	computer mice	-0.0004527	0.00015774	80	25	0.00536542	0.0441011
Collection	g__Rhodoplanes	computer mice	-0.0040516	0.00141395	80	44	0.0054366	0.0445053
Collection	g__Pseudonocardia	computer mice	-0.0006327	0.00022106	80	41	0.00549067	0.0447666
Collection	g__Capnocytophaga	computer mice	-0.0003109	0.00010887	80	31	0.00559313	0.0452409
Collection	f__Coxiellaceae	computer mice	-0.0001643	5.8e-05	80	17	0.00598718	0.0476617
Collection	f__Pseudonocardiaceae	computer mice	-0.000332	0.00011784	80	26	0.00621854	0.0481303
Collection	g__Fimbriimonas	computer mice	-0.0005269	0.00018679	80	23	0.00616466	0.0481303
Collection	f__UD5	computer mice	-0.0005213	0.0001858	80	19	0.00643481	0.0492848
Collection	o__Sphingobacteriales	computer mice	-0.00338	0.0012106	80	33	0.0066829	0.0506098
Collection	g__Selenomonas	computer mice	-0.0003131	0.00011277	80	24	0.00697475	0.0524273
Collection	g__Opitutus	computer mice	-0.0008476	0.00030575	80	17	0.0070627	0.0528918
Collection	o__Rickettsiales	computer mice	-0.0001515	5.47e-05	80	21	0.0071013	0.0529129
Collection	g__Adhaeribacter	computer mice	-0.0001526	5.52e-05	80	17	0.00719031	0.0532226
Collection	g__Faecalibacterium	computer mice	-0.001315	0.0004847	80	14	0.00830998	0.0575437
Collection	g__Gemmatimonas	computer mice	-0.0001154	4.25e-05	80	16	0.0082421	0.0575437
Collection	g__Catonella	computer mice	-0.0002049	7.57e-05	80	24	0.00842393	0.057936
Collection	g__Haemophilus	computer mice	-0.0195863	0.00724154	80	56	0.00850214	0.0580788
Collection	g__Steroidobacter	computer mice	-0.0004445	0.00016479	80	19	0.00867235	0.0585767
Collection	c__Betaproteobacteria	computer mice	-0.0015822	0.00059342	80	24	0.00944168	0.0613861
Collection	g__DA101	computer mice	-0.0063623	0.00239255	80	35	0.00962069	0.0623495
Collection	f__Isosphaeraceae	computer mice	-0.0004355	0.00016442	80	26	0.00989581	0.0631209
Collection	g__Geodermatophilus	computer mice	-0.0006706	0.00025302	80	29	0.00985332	0.0631209
Collection	g__Chthoniobacter	computer mice	-0.0015759	0.00059898	80	18	0.0103788	0.065581
Collection	o__Lactobacillales	computer mice	0.00057635	0.00021996	80	16	0.0106819	0.0663917
Collection	f__Ellin517	computer mice	-0.0003955	0.00015186	80	17	0.0111472	0.0678903
Collection	g__Eikenella	computer mice	-8.95e-05	3.46e-05	80	21	0.0116361	0.0691406
Collection	g__Mycobacterium	computer mice	-0.0018626	0.00072112	80	46	0.0117985	0.0693745
Collection	g__Afifella	computer mice	-7.52e-05	2.92e-05	80	15	0.0118958	0.069518
Collection	o__Spirobacillales	computer mice	-0.0004843	0.0001879	80	16	0.0119744	0.069776
Collection	f__Erythrobacteraceae	computer mice	-0.0005942	0.00023099	80	28	0.0121374	0.0705227
Collection	f__A4b	computer mice	-0.0003841	0.0001495	80	19	0.0122337	0.0706598
Collection	g__Shinella	computer mice	-0.0001208	4.7e-05	80	24	0.0122312	0.0706598
Collection	g__Planctomyces	computer mice	-0.0008468	0.00033052	80	19	0.0124659	0.071003
Collection	o__Sphingomonadales	computer mice	-0.0007561	0.0002948	80	33	0.0123768	0.071003
Collection	g__Aerococcus	computer mice	0.00172859	0.00067792	80	42	0.0128765	0.0726988
Collection	g__Meiothermus	computer mice	0.00119979	0.00047096	80	24	0.0129541	0.0727591
Collection	g__Dermacoccus	computer mice	0.00153807	0.00060488	80	31	0.0131179	0.0730701
Collection	f__EB1017	computer mice	-0.001036	0.00041465	80	22	0.0147235	0.0793647
Collection	f__Rhodospirillaceae	computer mice	-0.0022315	0.00089565	80	33	0.0149935	0.0797743
Collection	g__Williamsia	computer mice	-0.0005371	0.00021559	80	24	0.0149903	0.0797743
Collection	f__Sinobacteraceae	computer mice	-0.0019693	0.00079126	80	35	0.0150977	0.0799149
Collection	c__ML635J-21	computer mice	-0.0005625	0.00022753	80	19	0.0157591	0.082766
Collection	f__Armatimonadaceae	computer mice	-0.0001404	5.68e-05	80	20	0.0157498	0.082766
Collection	f__Alcaligenaceae	computer mice	-6.56e-05	2.69e-05	80	19	0.0170061	0.0877205
Collection	g__Parvimonas	computer mice	-0.0004374	0.00017952	80	22	0.0172741	0.0886501
Collection	f__Methylocystaceae	computer mice	-0.00258	0.00106178	80	38	0.0175621	0.089673
Collection	o__Rhodospirillales	computer mice	-0.0001213	5e-05	80	26	0.0178548	0.0909382
Collection	g__Ruminococcus	computer mice	-0.0006123	0.00025358	80	24	0.0182619	0.091789
Collection	f__Oxalobacteraceae	computer mice	-0.0555471	0.0230639	80	77	0.0185479	0.0928314
Collection	o__JG30-KF-CM45	computer mice	-0.0004224	0.0001779	80	29	0.020207	0.0982562
Collection	g__Asticcacaulis	computer mice	-0.0003713	0.00015729	80	19	0.020923	0.100729
Collection	g__Dermabacter	computer mice	-0.0002967	0.0001264	80	11	0.0216259	0.102888
Collection	g__Aquicella	computer mice	-0.0001271	5.42e-05	80	17	0.0218814	0.103277
Collection	g__Cellulomonas	computer mice	-0.0002888	0.00012356	80	31	0.0221507	0.103277
Collection	g__Dialister	computer mice	-0.0003465	0.00014823	80	28	0.0221673	0.103277
Collection	f__Cytophagaceae	computer mice	-0.0006761	0.00028986	80	28	0.0224241	0.103994
Collection	g__Campylobacter	computer mice	-0.0008185	0.00035431	80	30	0.0237095	0.107974
Collection	o__Cytophagales	computer mice	-0.000152	6.59e-05	80	16	0.023963	0.108639
Collection	g__Tannerella	computer mice	-0.0003347	0.00014545	80	21	0.0242487	0.1092
Collection	f__Patulibacteraceae	computer mice	-0.0007296	0.00031773	80	32	0.0245333	0.110236
Collection	g__Legionella	computer mice	-0.0001187	5.21e-05	80	18	0.025574	0.114152
Collection	o__Gaiellales	computer mice	-0.0003188	0.0001404	80	25	0.0261017	0.115875
Collection	f__Sphingomonadaceae	computer mice	-0.0012871	0.00056997	80	53	0.0269193	0.118182
Collection	g__Solirubrobacter	computer mice	-0.0007689	0.00034078	80	32	0.0270491	0.118182
Collection	f__Rhizobiaceae	computer mice	0.00076808	0.00034312	80	40	0.0282343	0.121987
Collection	g__Flavisolibacter	computer mice	-0.0034644	0.0015511	80	33	0.0285792	0.122431
Collection	f__[Chthoniobacteraceae]	computer mice	-0.0015619	0.00070154	80	29	0.0290742	0.123504
Collection	g__Iamia	computer mice	-0.0002321	0.00010545	80	18	0.0308869	0.129036
Collection	g__Skermanella	computer mice	-0.0002326	0.00010609	80	25	0.0315443	0.130702
Collection	f__Acetobacteraceae	computer mice	-0.0027159	0.00124356	80	46	0.0321778	0.132243
Collection	g__Phycicoccus	computer mice	-4.12e-05	1.89e-05	80	25	0.0327592	0.134359
Collection	f__mb2424	computer mice	-0.0002443	0.00011243	80	16	0.0330203	0.134611
Collection	g__Peptococcus	computer mice	-0.0001543	7.12e-05	80	16	0.0335183	0.135877
Collection	f__Rhodobacteraceae	computer mice	-0.0008067	0.00037387	80	35	0.0342409	0.137099
Collection	g__Psychrobacter	computer mice	0.00072529	0.00033642	80	14	0.0343889	0.13742
Collection	g__Agrobacterium	computer mice	-9.96e-05	4.64e-05	80	32	0.0350667	0.139029
Collection	o__iii1-15	computer mice	-0.0053696	0.00250763	80	34	0.0355878	0.139997
Collection	f__Ellin5301	computer mice	-0.0006562	0.00030825	80	26	0.0366427	0.142286
Collection	g__Burkholderia	computer mice	-0.0028483	0.00133738	80	34	0.0365645	0.142286
Collection	g__Erythrobacter	computer mice	-0.0002508	0.00011941	80	19	0.0391561	0.148823
Collection	p__FBP	computer mice	-0.0004271	0.00020332	80	20	0.039132	0.148823
Collection	g__Facklamia	computer mice	-0.0006784	0.00032541	80	16	0.0405943	0.152285
Collection	g__Ellin506	computer mice	-0.0014467	0.00069471	80	20	0.0408097	0.152527
Collection	o__Sva0725	computer mice	-0.0002698	0.00013022	80	20	0.041844	0.154961
Collection	g__Sphingomonas	computer mice	-0.0077487	0.00378602	80	72	0.0442917	0.161657
Collection	g__Peredibacter	computer mice	-0.0001364	6.7e-05	80	16	0.0453517	0.164634
Collection	g__Porphyromonas	computer mice	-0.0018167	0.00089761	80	41	0.046633	0.166269
Collection	f__Nakamurellaceae	computer mice	-0.0007239	0.00035893	80	30	0.0474045	0.167573
Collection	f__Microbacteriaceae	computer mice	-0.0017499	0.00087768	80	43	0.0499155	0.174016
Collection	g__Bulleidia	computer mice	-0.0002139	0.00010772	80	18	0.0508654	0.175124
Collection	g__Lautropia	computer mice	-0.0020013	0.00100796	80	36	0.0508496	0.175124
Collection	g__Tetragenococcus	computer mice	0.00134169	0.00067795	80	41	0.0515842	0.175722
Collection	f__Hyphomicrobiaceae	computer mice	-0.0013207	0.00067443	80	31	0.0540268	0.180865
Collection	g__Propionivibrio	computer mice	0.00103783	0.00053289	80	32	0.0553171	0.184101
Collection	g__Staphylococcus	computer mice	0.00285209	0.00146471	80	59	0.0553577	0.184101
Collection	g__Hymenobacter	computer mice	-0.0008142	0.00042079	80	52	0.0568751	0.187372
Collection	f__Gemmataceae	computer mice	-0.0005872	0.00030547	80	23	0.0584846	0.190245
Collection	g__Candidatus Protochlamydia	computer mice	-5.85e-05	3.05e-05	80	16	0.0588562	0.190245
Collection	g__Megasphaera	computer mice	-0.0003846	0.00020034	80	22	0.058827	0.190245
Collection	o__[Pedosphaerales]	computer mice	-0.0006567	0.00034208	80	16	0.0587809	0.190245
Collection	g__Rubrivivax	computer mice	-6.05e-05	3.16e-05	80	27	0.0599029	0.191651
Collection	g__Veillonella	computer mice	-0.0113771	0.0059526	80	62	0.0598945	0.191651
Collection	f__Beijerinckiaceae	computer mice	-0.0008354	0.0004392	80	32	0.0610929	0.194535
Collection	g__Enhydrobacter	computer mice	0.00138959	0.00073948	80	31	0.0642151	0.199668
Collection	g__Actinotalea	computer mice	-0.0001009	5.4e-05	80	23	0.0657171	0.202636
Collection	f__Caulobacteraceae	computer mice	-0.0037072	0.00198889	80	56	0.0663513	0.203894
Collection	c__Gemm-3	computer mice	-3.11e-05	1.69e-05	80	18	0.0691249	0.210498
Collection	f__Pseudomonadaceae	computer mice	0.00134487	0.00073009	80	62	0.0695262	0.211123
Collection	g__Caulobacter	computer mice	-0.0002192	0.00011912	80	41	0.0698021	0.211123
Collection	g__Devosia	computer mice	-0.0007118	0.00038688	80	33	0.0698523	0.211123
Collection	g__Paracoccus	computer mice	-0.0012958	0.00070428	80	38	0.0698416	0.211123
Collection	g__Leptotrichia	computer mice	-0.0039005	0.00215386	80	48	0.0742653	0.221155
Collection	g__Frigoribacterium	computer mice	-4.7e-05	2.62e-05	80	19	0.076464	0.22429
Collection	g__Luteolibacter	computer mice	-0.0001431	8.03e-05	80	12	0.0788203	0.226063
Collection	g__Segetibacter	computer mice	-0.0036298	0.00205072	80	28	0.0808984	0.22961
Collection	g__Leuconostoc	computer mice	-0.0001836	0.00010454	80	30	0.0832852	0.2326
Collection	c__Gitt-GS-136	computer mice	-3.77e-05	2.16e-05	80	15	0.0851791	0.236908
Collection	g__Dokdonella	computer mice	-6.59e-05	3.85e-05	80	16	0.0915478	0.247793
Collection	f__Piscirickettsiaceae	computer mice	-0.0005248	0.0003079	80	16	0.0925612	0.248551
Collection	g__Polaromonas	computer screen	-0.000793	0.00010406	80	38	7.27e-11	2.1e-08
Collection	f__Chitinophagaceae	computer screen	-0.0137782	0.00231311	80	48	8.34e-08	6.75e-06
Collection	g__Leuconostoc	computer screen	0.00045915	8.95e-05	80	30	2.28e-06	0.00010535
Collection	g__Bacillus	computer screen	0.0412519	0.00850718	80	79	6.8e-06	0.00028665
Collection	o__MIZ46	computer screen	-0.0009362	0.00020622	80	29	2.17e-05	0.00084488
Collection	o__Acidimicrobiales	computer screen	-0.001021	0.00022999	80	30	3.14e-05	0.00111443
Collection	o__Solibacterales	computer screen	-0.0013854	0.00031898	80	28	4.46e-05	0.00140778
Collection	g__Finegoldia	computer screen	0.00256775	0.00061329	80	25	7.8e-05	0.00216131
Collection	g__Candidatus Solibacter	computer screen	-0.000981	0.00023562	80	25	8.47e-05	0.00227286
Collection	f__Micromonosporaceae	computer screen	-0.0001902	4.59e-05	80	32	9.21e-05	0.0023417
Collection	o__Ellin329	computer screen	-0.0013343	0.00032244	80	22	9.26e-05	0.0023417
Collection	g__Gemmata	computer screen	-0.0008213	0.00020231	80	18	0.00012198	0.00280284
Collection	g__Bdellovibrio	computer screen	-0.0006591	0.00016338	80	22	0.00013353	0.00290314
Collection	o__Myxococcales	computer screen	-0.0035057	0.00089518	80	37	0.00020044	0.00405299
Collection	f__Haliangiaceae	computer screen	-0.0002646	6.92e-05	80	20	0.00027329	0.00541756
Collection	o__Rhizobiales	computer screen	-0.0014019	0.00037372	80	42	0.00035003	0.00655329
Collection	f__Ellin6075	computer screen	-0.004287	0.00116693	80	43	0.00045288	0.00817608
Collection	c__Alphaproteobacteria	computer screen	-0.0016356	0.00044764	80	36	0.0004836	0.0085776
Collection	g__Hyphomicrobium	computer screen	-0.0010558	0.00029789	80	24	0.00069088	0.0114774
Collection	o__BD7-3	computer screen	-0.0001173	3.35e-05	80	17	0.00078394	0.0124813
Collection	g__Kaistobacter	computer screen	-0.0003586	0.00010343	80	34	0.00088691	0.0137948
Collection	g__Phenylobacterium	computer screen	-0.0004958	0.00014371	80	25	0.00093583	0.0143352
Collection	g__Corynebacterium	computer screen	0.0398956	0.0116404	80	77	0.00100486	0.0149399
Collection	g__Gemmatimonas	computer screen	-0.0001238	3.64e-05	80	16	0.00107778	0.015509
Collection	o__Solirubrobacterales	computer screen	-0.0023892	0.00071717	80	43	0.00135807	0.0184297
Collection	f__Legionellaceae	computer screen	-0.0001066	3.22e-05	80	17	0.00146059	0.0194297
Collection	g__Peptoniphilus	computer screen	0.00154397	0.00047627	80	28	0.0017911	0.022635
Collection	o__SC-I-84	computer screen	-0.0013025	0.00040873	80	23	0.00211802	0.0248383
Collection	f__Solirubrobacteraceae	computer screen	-0.000584	0.0001858	80	27	0.00241749	0.0269339
Collection	g__Pseudonocardia	computer screen	-0.0005942	0.00018915	80	41	0.00242993	0.0269339
Collection	o__WD2101	computer screen	-0.0014483	0.00046187	80	28	0.00247001	0.0269339
Collection	g__Eikenella	computer screen	9.22e-05	2.96e-05	80	21	0.0026091	0.0277663
Collection	g__Mycobacterium	computer screen	-0.0019116	0.00061703	80	46	0.00276477	0.0288164
Collection	f__Sphingomonadaceae	computer screen	-0.001509	0.0004877	80	53	0.00279734	0.0290062
Collection	o__Ellin6067	computer screen	-0.0009558	0.00030953	80	25	0.00284907	0.0292427
Collection	g__Terracoccus	computer screen	-0.0002272	7.37e-05	80	31	0.00290743	0.0294927
Collection	f__Patulibacteraceae	computer screen	-0.0008215	0.00027186	80	32	0.00346333	0.0328772
Collection	c__Ellin6529	computer screen	-0.0005984	0.00020216	80	30	0.00414373	0.0375723
Collection	f__Ellin517	computer screen	-0.0003791	0.00012994	80	17	0.00468124	0.0407995
Collection	g__Afifella	computer screen	-7.29e-05	2.5e-05	80	15	0.00464218	0.0407995
Collection	g__Rubrivivax	computer screen	-7.88e-05	2.71e-05	80	27	0.00479053	0.0410793
Collection	g__Nocardioides	computer screen	-0.0004323	0.00014871	80	31	0.0048307	0.0412138
Collection	f__Oxalobacteraceae	computer screen	0.0570165	0.0197347	80	77	0.00508196	0.0428155
Collection	f__Coxiellaceae	computer screen	-0.0001427	4.96e-05	80	17	0.00531024	0.0441011
Collection	g__Bosea	computer screen	-0.0006231	0.00021941	80	39	0.00584249	0.046879
Collection	g__Fimbriimonas	computer screen	-0.0004502	0.00015982	80	23	0.00623646	0.0481303
Collection	g__Roseomonas	computer screen	-0.0003806	0.00013497	80	25	0.0061776	0.0481303
Collection	f__Micrococcaceae	computer screen	-0.0011615	0.00041289	80	46	0.00629955	0.0484323
Collection	f__Cytophagaceae	computer screen	-0.0006844	0.00024802	80	28	0.00731745	0.0532226
Collection	f__EB1017	computer screen	-0.0009792	0.0003548	80	22	0.00730809	0.0532226
Collection	g__Microbacterium	computer screen	-9.47e-05	3.44e-05	80	27	0.00738203	0.0533088
Collection	f__Myxococcaceae	computer screen	-0.0001372	5.02e-05	80	17	0.00782253	0.0554988
Collection	f__Nocardioidaceae	computer screen	-0.0014314	0.00052439	80	52	0.00794049	0.0559431
Collection	g__Pedobacter	computer screen	-0.0003747	0.00013739	80	27	0.00798857	0.0560864
Collection	f__Comamonadaceae	computer screen	0.0118294	0.00435891	80	77	0.00829247	0.0575437
Collection	p__FBP	computer screen	-0.0004693	0.00017397	80	20	0.00866162	0.0585767
Collection	f__Sphingobacteriaceae	computer screen	-0.00233	0.00086529	80	26	0.00878412	0.0590083
Collection	g__Rhodoplanes	computer screen	-0.0032524	0.00120985	80	44	0.00889173	0.0595333
Collection	c__Betaproteobacteria	computer screen	-0.0013584	0.00050776	80	24	0.00921226	0.0602821
Collection	g__Chthoniobacter	computer screen	-0.0013722	0.00051252	80	18	0.00916049	0.0602821
Collection	g__Solirubrobacter	computer screen	-0.0007801	0.00029159	80	32	0.00920934	0.0602821
Collection	o__Rhodospirillales	computer screen	-0.0001146	4.28e-05	80	26	0.00917523	0.0602821
Collection	g__DA101	computer screen	-0.005424	0.0020472	80	35	0.0098769	0.0631209
Collection	g__Gordonia	computer screen	0.00062812	0.00023733	80	30	0.00995236	0.063282
Collection	g__Devosia	computer screen	-0.0008668	0.00033104	80	33	0.0107369	0.0663917
Collection	g__Opitutus	computer screen	-0.0006782	0.00026161	80	17	0.0115041	0.0688201
Collection	f__Rhodospirillaceae	computer screen	-0.0019785	0.00076637	80	33	0.0118369	0.0693745
Collection	o__Sphingobacteriales	computer screen	-0.0026403	0.00103586	80	33	0.0129075	0.0726988
Collection	c__Gemm-1	computer screen	-0.0002985	0.00011726	80	18	0.0130319	0.0727914
Collection	f__A4b	computer screen	-0.0003218	0.00012792	80	19	0.0140673	0.0768758
Collection	g__Cellulomonas	computer screen	-0.0002586	0.00010572	80	31	0.0168536	0.087604
Collection	f__AK1AB1_02E	computer screen	-4.63e-05	1.89e-05	80	16	0.0169613	0.0877129
Collection	f__Sinobacteraceae	computer screen	-0.0016395	0.00067705	80	35	0.0179384	0.0911345
Collection	g__Aquicella	computer screen	-0.0001116	4.64e-05	80	17	0.018716	0.092982
Collection	g__Candidatus Protochlamydia	computer screen	-6.26e-05	2.61e-05	80	16	0.0190196	0.0940286
Collection	g__Bifidobacterium	computer screen	0.00081057	0.00033963	80	27	0.019595	0.0961676
Collection	g__Legionella	computer screen	-0.0001057	4.45e-05	80	18	0.0202337	0.0982562
Collection	g__Asticcacaulis	computer screen	-0.0003169	0.00013458	80	19	0.0212195	0.101673
Collection	g__Steroidobacter	computer screen	-0.0003308	0.00014101	80	19	0.0216924	0.102963
Collection	f__C111	computer screen	-0.000276	0.00011784	80	22	0.0219145	0.103277
Collection	g__Arthrobacter	computer screen	-0.000122	5.22e-05	80	25	0.0221492	0.103277
Collection	o__Gaiellales	computer screen	-0.0002814	0.00012013	80	25	0.0218928	0.103277
Collection	f__Pirellulaceae	computer screen	-0.0008689	0.00037221	80	25	0.0223286	0.103789
Collection	g__Lampropedia	computer screen	-0.0001216	5.22e-05	80	23	0.0226286	0.104226
Collection	o__Cytophagales	computer screen	-0.0001305	5.64e-05	80	16	0.0234901	0.107217
Collection	f__Ellin5301	computer screen	-0.0005964	0.00026375	80	26	0.0267302	0.117878
Collection	o__[Pedosphaerales]	computer screen	-0.0006578	0.0002927	80	16	0.0276303	0.120147
Collection	f__Gaiellaceae	computer screen	-0.0022125	0.00099731	80	38	0.0296352	0.125624
Collection	f__Gemmataceae	computer screen	-0.0005775	0.00026137	80	23	0.0302859	0.127846
Collection	g__Planctomyces	computer screen	-0.0006127	0.00028281	80	19	0.0335323	0.135877
Collection	f__Hyphomicrobiaceae	computer screen	-0.0012489	0.00057708	80	31	0.0337273	0.136188
Collection	f__Nakamurellaceae	computer screen	-0.000663	0.00030712	80	30	0.0341512	0.137027
Collection	f__UD5	computer screen	-0.0003416	0.00015898	80	19	0.0349916	0.139004
Collection	o__Actinomycetales	computer screen	-0.0018396	0.00085618	80	45	0.0349854	0.139004
Collection	f__Streptomycetaceae	computer screen	-0.0001688	7.9e-05	80	22	0.0359839	0.140462
Collection	f__[Chthoniobacteraceae]	computer screen	-0.0012747	0.00060028	80	29	0.037102	0.143442
Collection	g__Paracoccus	computer screen	0.00126809	0.00060262	80	38	0.0387957	0.148009
Collection	f__Erythrobacteraceae	computer screen	-0.0004149	0.00019765	80	28	0.0392493	0.148897
Collection	g__Pilimelia	computer screen	-0.0003645	0.00017392	80	32	0.0395731	0.149564
Collection	g__Lapillicoccus	computer screen	-0.0007831	0.00037654	80	39	0.041055	0.153035
Collection	o__Sphingomonadales	computer screen	-0.0005245	0.00025225	80	33	0.0411139	0.153035
Collection	g__Geodermatophilus	computer screen	-0.0004439	0.0002165	80	29	0.043924	0.160604
Collection	g__Segetibacter	computer screen	-0.0035755	0.0017547	80	28	0.0452093	0.164412
Collection	o__Spirobacillales	computer screen	-0.0003269	0.00016078	80	16	0.045652	0.164836
Collection	f__Pseudonocardiaceae	computer screen	-0.000204	0.00010083	80	26	0.0466837	0.166269
Collection	o__iii1-15	computer screen	-0.0043379	0.00214566	80	34	0.0468712	0.166269
Collection	g__Hymenobacter	computer screen	-0.0007216	0.00036005	80	52	0.0487709	0.170909
Collection	g__Mycetocola	computer screen	-0.0001775	8.87e-05	80	34	0.0492444	0.17227
Collection	g__Ellin506	computer screen	-0.0011807	0.00059443	80	20	0.0507546	0.175124
Collection	f__Beijerinckiaceae	computer screen	-0.000742	0.0003758	80	32	0.0521225	0.177129
Collection	g__Adhaeribacter	computer screen	-9.29e-05	4.72e-05	80	17	0.0528773	0.178494
Collection	g__Flavisolibacter	computer screen	-0.0026037	0.0013272	80	33	0.0535972	0.180023
Collection	g__Actinotalea	computer screen	-9.05e-05	4.62e-05	80	23	0.0539948	0.180865
Collection	p__WPS-2	computer screen	-0.0001851	9.46e-05	80	21	0.0541542	0.180991
Collection	c__C0119	computer screen	-0.0002983	0.0001542	80	18	0.0568974	0.187372
Collection	o__OPB54	computer screen	-0.0002948	0.00015248	80	33	0.0570601	0.187603
Collection	o__Gemmatimonadales	computer screen	-0.0004805	0.00024968	80	22	0.0582097	0.189839
Collection	o__Rickettsiales	computer screen	-8.83e-05	4.68e-05	80	21	0.0633238	0.198821
Collection	f__Erysipelotrichaceae	computer screen	8.53e-05	4.54e-05	80	13	0.0641933	0.199668
Collection	g__Methylobacterium	computer screen	-0.0034805	0.00185265	80	62	0.0642847	0.199668
Collection	g__Prevotella	computer screen	-0.0085755	0.00462167	80	61	0.067563	0.206363
Collection	f__Phyllobacteriaceae	computer screen	-0.0004426	0.00024263	80	35	0.0721897	0.216569
Collection	g__Burkholderia	computer screen	-0.0020777	0.00114434	80	34	0.0735331	0.219622
Collection	f__Armatimonadaceae	computer screen	-8.81e-05	4.86e-05	80	20	0.0739028	0.2204
Collection	f__Piscirickettsiaceae	computer screen	-0.0004744	0.00026346	80	16	0.0758673	0.223822
Collection	g__Peredibacter	computer screen	-0.0001028	5.73e-05	80	16	0.0768749	0.224531
Collection	f__mb2424	computer screen	-0.000172	9.62e-05	80	16	0.0778937	0.225296
Collection	g__Actinoplanes	computer screen	-7.72e-05	4.31e-05	80	18	0.0775056	0.225296
Collection	c__ML635J-21	computer screen	-0.0003456	0.00019469	80	19	0.0800288	0.228234
Collection	g__Erythrobacter	computer screen	-0.0001809	0.00010217	80	19	0.0807502	0.22961
Collection	g__Iamia	computer screen	-0.0001592	9.02e-05	80	18	0.0817779	0.230943
Collection	g__Erwinia	computer screen	0.00088137	0.00050156	80	57	0.083067	0.232312
Collection	g__Streptomyces	computer screen	-0.000274	0.00015764	80	35	0.0863667	0.239881
Collection	o__Sva0725	computer screen	-0.0001932	0.00011142	80	20	0.087147	0.241385
Collection	o__N1423WL	computer screen	-0.0005452	0.00031698	80	14	0.0896879	0.244735
Collection	g__Blastococcus	saliva	0.00052884	8.46e-05	80	27	2.47e-08	2.94e-06
Collection	g__Micrococcus	saliva	0.00452218	0.00072612	80	49	2.71e-08	3.05e-06
Collection	f__Chitinophagaceae	saliva	-0.0131807	0.00231311	80	48	2.4e-07	1.67e-05
Collection	g__Ruminococcus	saliva	0.0012191	0.00021698	80	24	3.31e-07	2.23e-05
Collection	f__Rhodobacteraceae	saliva	0.00167081	0.0003199	80	35	1.6e-06	8.09e-05
Collection	f__Sporichthyaceae	saliva	0.00048551	9.33e-05	80	27	1.73e-06	8.55e-05
Collection	g__Sporosarcina	saliva	0.00482071	0.00096781	80	38	4.1e-06	0.00018038
Collection	o__MIZ46	saliva	-0.0010172	0.00020622	80	29	4.94e-06	0.00021252
Collection	g__Polaromonas	saliva	-0.0004831	0.00010406	80	38	1.48e-05	0.00059952
Collection	g__Faecalibacterium	saliva	0.00184782	0.00041473	80	14	2.96e-05	0.00106963
Collection	o__Acidimicrobiales	saliva	-0.0010252	0.00022999	80	30	2.94e-05	0.00106963
Collection	g__Modestobacter	saliva	0.00478251	0.00109104	80	36	3.85e-05	0.00125619
Collection	g__Nesterenkonia	saliva	0.00045083	0.00010425	80	15	4.76e-05	0.0014774
Collection	o__Clostridiales	saliva	0.00479212	0.00111614	80	63	5.33e-05	0.00159078
Collection	o__Bacillales	saliva	0.0038253	0.0008921	80	64	5.44e-05	0.00159352
Collection	g__Rubrobacter	saliva	0.00015831	3.75e-05	80	8	6.98e-05	0.0019876
Collection	o__Solibacterales	saliva	-0.0013145	0.00031898	80	28	9.85e-05	0.00242876
Collection	o__Ellin329	saliva	-0.0013248	0.00032244	80	22	0.00010281	0.0025047
Collection	g__Gemmata	saliva	-0.0008214	0.00020231	80	18	0.00012187	0.00280284
Collection	g__Pseudonocardia	saliva	0.00076513	0.00018915	80	41	0.00012847	0.00288619
Collection	g__Dermabacter	saliva	0.00043533	0.00010815	80	11	0.00013763	0.00296043
Collection	f__Aurantimonadaceae	saliva	0.00018886	4.73e-05	80	13	0.00015576	0.0033152
Collection	g__Bdellovibrio	saliva	-0.0006505	0.00016338	80	22	0.00016016	0.00337332
Collection	o__Streptophyta	saliva	0.0246048	0.00618534	80	60	0.0001621	0.00337912
Collection	g__Facklamia	saliva	0.00106961	0.00027844	80	16	0.00025841	0.00517336
Collection	f__Erysipelotrichaceae	saliva	0.00016688	4.54e-05	80	13	0.00044608	0.0081258
Collection	o__Myxococcales	saliva	-0.0032781	0.00089518	80	37	0.00047076	0.00842366
Collection	f__Ellin6075	saliva	-0.0040936	0.00116693	80	43	0.00077677	0.0124813
Collection	g__Skermanella	saliva	0.00031237	9.08e-05	80	25	0.0009618	0.0145131
Collection	g__Gemmatimonas	saliva	-0.0001238	3.64e-05	80	16	0.00107778	0.015509
Collection	o__BD7-3	saliva	-0.0001136	3.35e-05	80	17	0.00111345	0.0158549
Collection	g__Rubellimicrobium	saliva	0.00065345	0.00019272	80	12	0.00112806	0.0159506
Collection	g__Deinococcus	saliva	0.00068236	0.00020304	80	55	0.00123902	0.0173912
Collection	f__Haliangiaceae	saliva	-0.0002306	6.92e-05	80	20	0.00135126	0.0184297
Collection	c__Alphaproteobacteria	saliva	-0.0014647	0.00044764	80	36	0.00163226	0.0214313
Collection	g__Wautersiella	saliva	1.88e-05	5.78e-06	80	12	0.00168943	0.0220356
Collection	g__Candidatus Solibacter	saliva	-0.0007617	0.00023562	80	25	0.0018421	0.0229922
Collection	o__SC-I-84	saliva	-0.0013034	0.00040873	80	23	0.00210493	0.0248383
Collection	g__Brevibacterium	saliva	0.00083887	0.00026403	80	20	0.00218087	0.0253432
Collection	g__Phenylobacterium	saliva	-0.0004544	0.00014371	80	25	0.00228584	0.0262612
Collection	g__Brachybacterium	saliva	0.00092827	0.00029415	80	45	0.00232578	0.026569
Collection	f__Bartonellaceae	saliva	0.00014453	4.59e-05	80	15	0.00239344	0.0269339
Collection	g__Pullulanibacillus	saliva	0.00182333	0.00057912	80	39	0.00237783	0.0269339
Collection	o__Ellin6067	saliva	-0.0009722	0.00030953	80	25	0.00243346	0.0269339
Collection	f__Legionellaceae	saliva	-0.0001002	3.22e-05	80	17	0.00266741	0.0282383
Collection	g__Gardnerella	saliva	8.84e-05	2.88e-05	80	12	0.00306277	0.0303575
Collection	g__Coprococcus	saliva	0.0005606	0.00018367	80	31	0.00316791	0.0309445
Collection	o__WD2101	saliva	-0.0013958	0.00046187	80	28	0.00346046	0.0328772
Collection	f__Acetobacteraceae	saliva	0.00318976	0.00106405	80	46	0.00371602	0.0347861
Collection	f__Planococcaceae	saliva	0.00117448	0.00039425	80	58	0.00392395	0.0362293
Collection	g__Kocuria	saliva	0.0016214	0.00055727	80	42	0.00479462	0.0410793
Collection	f__Ellin517	saliva	-0.0003775	0.00012994	80	17	0.00485532	0.0412498
Collection	g__Streptococcus	saliva	-0.0756104	0.0260917	80	80	0.00495714	0.0419387
Collection	o__Solirubrobacterales	saliva	-0.002064	0.00071717	80	43	0.00524663	0.0440194
Collection	g__Acinetobacter	saliva	0.00215335	0.00074968	80	68	0.00533076	0.0441011
Collection	f__Coxiellaceae	saliva	-0.0001417	4.96e-05	80	17	0.00559359	0.0452409
Collection	o__Rhizobiales	saliva	-0.0010468	0.00037372	80	42	0.00651708	0.0497266
Collection	g__Rubrivivax	saliva	-7.57e-05	2.71e-05	80	27	0.00661254	0.0502652
Collection	g__Paracoccus	saliva	0.00167352	0.00060262	80	38	0.00696562	0.0524273
Collection	g__Kineococcus	saliva	7.85e-05	2.84e-05	80	12	0.00711786	0.0529129
Collection	f__Coriobacteriaceae	saliva	0.0009654	0.00034925	80	21	0.00721977	0.0532226
Collection	g__Halomonas	saliva	6.08e-05	2.21e-05	80	10	0.00735958	0.0533088
Collection	f__Thermoactinomycetaceae	saliva	0.00179221	0.00065062	80	36	0.00741334	0.0533444
Collection	f__Myxococcaceae	saliva	-0.0001372	5.02e-05	80	17	0.00779978	0.0554988
Collection	g__Ramlibacter	saliva	-0.0010224	0.00037414	80	40	0.00787375	0.0556668
Collection	g__Chthoniobacter	saliva	-0.0013723	0.00051252	80	18	0.00915277	0.0602821
Collection	g__Truepera	saliva	0.00065698	0.00024515	80	7	0.00909722	0.0602821
Collection	g__DA101	saliva	-0.0053675	0.0020472	80	35	0.010637	0.0663917
Collection	g__Nelumbo	saliva	0.00074487	0.00028469	80	27	0.0107924	0.0665315
Collection	f__Sphingobacteriaceae	saliva	-0.0022569	0.00086529	80	26	0.0110304	0.0673818
Collection	g__Pedobacter	saliva	-0.0003584	0.00013739	80	27	0.0110168	0.0673818
Collection	g__Turicibacter	saliva	0.0007637	0.00029274	80	24	0.0110144	0.0673818
Collection	g__Planifilum	saliva	0.00078799	0.00030356	80	37	0.0114011	0.0688152
Collection	g__Opitutus	saliva	-0.0006782	0.00026161	80	17	0.0115041	0.0688201
Collection	g__Corynebacterium	saliva	0.0301636	0.0116404	80	77	0.0115408	0.0688364
Collection	f__C111	saliva	-0.0003043	0.00011784	80	22	0.0118118	0.0693745
Collection	g__Lactobacillus	saliva	0.00322449	0.00125551	80	54	0.0122659	0.0706598
Collection	f__EB1017	saliva	-0.0009098	0.0003548	80	22	0.0123974	0.071003
Collection	g__Dietzia	saliva	8.81e-05	3.47e-05	80	11	0.0133534	0.074038
Collection	g__Fimbriimonas	saliva	-0.000404	0.00015982	80	23	0.0136312	0.0753066
Collection	g__Microbispora	saliva	0.00036106	0.00014369	80	29	0.0141886	0.07733
Collection	f__Kineosporiaceae	saliva	0.00024345	9.69e-05	80	24	0.0142281	0.0773364
Collection	f__UD5	saliva	-0.0003971	0.00015898	80	19	0.0147582	0.0793647
Collection	f__Clostridiaceae	saliva	0.00207352	0.00083148	80	60	0.014905	0.0797298
Collection	p__FBP	saliva	-0.0004246	0.00017397	80	20	0.0170885	0.0879212
Collection	g__Paenibacillus	saliva	0.00156511	0.00064361	80	47	0.0174797	0.0894784
Collection	f__Lachnospiraceae	saliva	0.00089856	0.00037159	80	54	0.0180952	0.091471
Collection	f__Porphyromonadaceae	saliva	0.0148764	0.00615013	80	47	0.0180618	0.091471
Collection	o__Sphingobacteriales	saliva	-0.0025037	0.00103586	80	33	0.0181461	0.0914998
Collection	g__Cloacibacterium	saliva	0.00322133	0.00133452	80	29	0.0182943	0.091789
Collection	g__Aquicella	saliva	-0.0001117	4.64e-05	80	17	0.0186619	0.0929415
Collection	f__A4b	saliva	-0.0003059	0.00012792	80	19	0.0193646	0.0955003
Collection	g__Legionella	saliva	-0.0001062	4.45e-05	80	18	0.0197014	0.0962227
Collection	c__Betaproteobacteria	saliva	-0.0012025	0.00050776	80	24	0.0205191	0.0992577
Collection	g__Candidatus Protochlamydia	saliva	-6.16e-05	2.61e-05	80	16	0.0207644	0.100205
Collection	f__Rhodospirillaceae	saliva	-0.0018017	0.00076637	80	33	0.0214302	0.102439
Collection	g__Bacillus	saliva	0.0198865	0.00850718	80	79	0.0221516	0.103277
Collection	f__Isosphaeraceae	saliva	-0.0003279	0.00014069	80	26	0.0225356	0.104154
Collection	g__Mycobacterium	saliva	-0.001433	0.00061703	80	46	0.0230031	0.10571
Collection	o__Cytophagales	saliva	-0.0001305	5.64e-05	80	16	0.0234901	0.107217
Collection	f__Ruminococcaceae	saliva	0.0010427	0.00045282	80	38	0.0241495	0.108996
Collection	g__Steroidobacter	saliva	-0.0003221	0.00014101	80	19	0.0252548	0.112976
Collection	g__Pilimelia	saliva	0.00039487	0.00017392	80	32	0.0261321	0.115875
Collection	g__Bosea	saliva	-0.000497	0.00021941	80	39	0.0264823	0.117171
Collection	c__Clostridia	saliva	0.00026014	0.00011507	80	23	0.0267586	0.117878
Collection	g__Afifella	saliva	-5.63e-05	2.5e-05	80	15	0.0270615	0.118182
Collection	f__Pirellulaceae	saliva	-0.000836	0.00037221	80	25	0.0277293	0.120319
Collection	f__Peptostreptococcaceae	saliva	0.00075258	0.00033678	80	45	0.0285014	0.122431
Collection	g__Rhodoplanes	saliva	-0.002703	0.00120985	80	44	0.0285348	0.122431
Collection	o__[Pedosphaerales]	saliva	-0.0006356	0.0002927	80	16	0.0331394	0.134825
Collection	g__Zea	saliva	0.00035002	0.00016175	80	14	0.0337438	0.136188
Collection	g__Streptomyces	saliva	0.00034068	0.00015764	80	35	0.0339691	0.136824
Collection	g__Luteimicrobium	saliva	0.00076318	0.00035598	80	29	0.0353725	0.139694
Collection	g__Anaerococcus	saliva	0.0084461	0.0039502	80	38	0.0358525	0.140462
Collection	f__Ellin5301	saliva	-0.000561	0.00026375	80	26	0.0368039	0.142562
Collection	g__Devosia	saliva	-0.0007013	0.00033104	80	33	0.0375428	0.144593
Collection	f__Methylobacteriaceae	saliva	0.00230806	0.00109018	80	43	0.0376565	0.144755
Collection	g__Planctomyces	saliva	-0.0005905	0.00028281	80	19	0.0402856	0.151408
Collection	f__Solirubrobacteraceae	saliva	-0.000385	0.0001858	80	27	0.041792	0.154961
Collection	f__Bradyrhizobiaceae	saliva	-0.0022892	0.00110734	80	68	0.0422515	0.155332
Collection	f__Gemellaceae	saliva	-0.0042852	0.00208043	80	48	0.042985	0.157742
Collection	o__iii1-15	saliva	-0.0044174	0.00214566	80	34	0.0430866	0.157828
Collection	o__Spirobacillales	saliva	-0.0003269	0.00016078	80	16	0.045652	0.164836
Collection	f__Bacillaceae	saliva	0.00307476	0.00151405	80	73	0.0459157	0.165408
Collection	f__[Chthoniobacteraceae]	saliva	-0.0012139	0.00060028	80	29	0.0468125	0.166269
Collection	g__Microbacterium	saliva	-6.95e-05	3.44e-05	80	27	0.0468373	0.166269
Collection	g__Alicyclobacillus	saliva	0.00114978	0.00057205	80	38	0.0481335	0.169557
Collection	o__OPB54	saliva	0.00030587	0.00015248	80	33	0.0485718	0.170507
Collection	g__Sphingobacterium	saliva	0.00025378	0.00012714	80	13	0.0496637	0.173437
Collection	c__Ellin6529	saliva	-0.0004024	0.00020216	80	30	0.0502844	0.175
Collection	g__Ellin506	saliva	-0.0011802	0.00059443	80	20	0.0508493	0.175124
Collection	c__Gemm-3	saliva	2.86e-05	1.44e-05	80	18	0.0514995	0.175722
Collection	g__Kingella	saliva	-9.81e-05	4.97e-05	80	23	0.0523645	0.177653
Collection	g__Enterococcus	saliva	0.00049692	0.00025237	80	27	0.0527492	0.178494
Collection	g__Brevibacillus	saliva	0.00033506	0.00017182	80	22	0.0550056	0.183533
Collection	g__Segetibacter	saliva	-0.0034153	0.0017547	80	28	0.0554564	0.184126
Collection	g__Terracoccus	saliva	-0.0001414	7.37e-05	80	31	0.0590413	0.190353
Collection	f__Cytophagaceae	saliva	-0.000475	0.00024802	80	28	0.0593843	0.190898
Collection	f__[Mogibacteriaceae]	saliva	-0.0003537	0.00018648	80	24	0.0618377	0.195981
Collection	f__Patulibacteraceae	saliva	-0.0005145	0.00027186	80	32	0.0624132	0.197187
Collection	o__Gaiellales	saliva	-0.0002264	0.00012013	80	25	0.063497	0.199056
Collection	g__Prauserella	saliva	0.00026153	0.00013889	80	23	0.063692	0.199358
Collection	g__Burkholderia	saliva	-0.0021387	0.00114434	80	34	0.0656395	0.202636
Collection	f__Intrasporangiaceae	saliva	0.00025933	0.00013926	80	33	0.0666124	0.204386
Collection	g__Exiguobacterium	saliva	0.00024882	0.00013427	80	28	0.0679083	0.207105
Collection	g__Hyphomicrobium	saliva	-0.0005484	0.00029789	80	24	0.0697088	0.211123
Collection	g__Veillonella	saliva	-0.0092112	0.00509337	80	62	0.0746501	0.221648
Collection	g__Prevotella	saliva	-0.0083519	0.00462167	80	61	0.0748647	0.22196
Collection	f__Armatimonadaceae	saliva	-8.77e-05	4.86e-05	80	20	0.0752511	0.222453
Collection	f__Solibacteraceae	saliva	-0.0003865	0.00021511	80	27	0.0764829	0.22429
Collection	g__Solirubrobacter	saliva	-0.0005237	0.00029159	80	32	0.0766489	0.22429
Collection	f__Sinobacteraceae	saliva	-0.0012146	0.00067705	80	35	0.0769536	0.224531
Collection	g__Amaricoccus	saliva	0.00175368	0.00098009	80	19	0.0777144	0.225296
Collection	g__Bulleidia	saliva	-0.0001647	9.22e-05	80	18	0.0781071	0.225296
Collection	g__Chryseobacterium	saliva	0.0002871	0.00016064	80	46	0.0780397	0.225296
Collection	f__Piscirickettsiaceae	saliva	-0.0004691	0.00026346	80	16	0.0791477	0.226681
Collection	g__Bacteroides	saliva	0.00088957	0.00050099	80	23	0.0799583	0.228234
Collection	g__Brevundimonas	saliva	9.4e-05	5.33e-05	80	15	0.0822549	0.23127
Collection	g__Lapillicoccus	saliva	0.00066299	0.00037654	80	39	0.0824656	0.23127
Collection	g__Catonella	saliva	-0.0001139	6.47e-05	80	24	0.0827066	0.231624
Collection	f__Hyphomicrobiaceae	saliva	-0.0010111	0.00057708	80	31	0.0839503	0.234134
Collection	g__SMB53	saliva	0.00098093	0.00056209	80	33	0.0851682	0.236908
Collection	f__Gaiellaceae	saliva	-0.0017217	0.00099731	80	38	0.0885196	0.243188
Collection	o__N1423WL	saliva	-0.0005452	0.00031698	80	14	0.0896879	0.244735
Collection	g__Nocardioides	saliva	-0.0002546	0.00014871	80	31	0.0910851	0.247214
Collection	f__mb2424	saliva	-0.0001641	9.62e-05	80	16	0.0923174	0.248551
Collection	g__Oribacterium	saliva	-0.0004073	0.00023949	80	26	0.0932201	0.249685
Collection	g__Catonella	soil	0.00055439	6.47e-05	80	24	1.23e-12	1.25e-09
Collection	g__Haemophilus	soil	0.0532212	0.00619625	80	56	1.1e-12	1.25e-09
Collection	g__Streptococcus	soil	0.206212	0.0260917	80	80	2.14e-11	8.77e-09
Collection	g__Veillonella	soil	0.0402386	0.00509337	80	62	2.17e-11	8.77e-09
Collection	g__Polaromonas	soil	-0.0007985	0.00010406	80	38	5.79e-11	1.95e-08
Collection	g__Prevotella	soil	0.0347386	0.00462167	80	61	1.14e-10	2.87e-08
Collection	g__Bulleidia	soil	0.0006824	9.22e-05	80	18	1.85e-10	4.15e-08
Collection	g__Porphyromonas	soil	0.00555961	0.00076804	80	41	3.75e-10	7.58e-08
Collection	g__Megasphaera	soil	0.00121666	0.00017142	80	22	6.87e-10	1.26e-07
Collection	g__Granulicatella	soil	0.0189914	0.00269927	80	68	8.94e-10	1.51e-07
Collection	g__Kingella	soil	0.00033978	4.97e-05	80	23	2.13e-09	3.31e-07
Collection	g__Campylobacter	soil	0.00205013	0.00030317	80	30	2.86e-09	4.14e-07
Collection	g__Rothia	soil	0.00915486	0.00137218	80	53	4.2e-09	5.67e-07
Collection	g__Peptococcus	soil	0.00038371	6.09e-05	80	16	2.02e-08	2.55e-06
Collection	g__Actinomyces	soil	0.0210062	0.00343161	80	66	4.22e-08	4.37e-06
Collection	g__Atopobium	soil	0.00330318	0.00054011	80	30	4.32e-08	4.37e-06
Collection	g__Oribacterium	soil	0.00146135	0.00023949	80	26	4.58e-08	4.41e-06
Collection	g__Parvimonas	soil	0.0009338	0.00015361	80	22	5.03e-08	4.62e-06
Collection	f__Chitinophagaceae	soil	-0.0139106	0.00231311	80	48	6.59e-08	5.79e-06
Collection	g__Treponema	soil	0.00159856	0.00026701	80	19	7.36e-08	6.2e-06
Collection	f__[Mogibacteriaceae]	soil	0.00108917	0.00018648	80	24	1.34e-07	1.04e-05
Collection	f__Gemellaceae	soil	0.0119451	0.00208043	80	48	2.01e-07	1.45e-05
Collection	g__Mycoplasma	soil	0.00038369	6.99e-05	80	15	5.5e-07	3.59e-05
Collection	g__Capnocytophaga	soil	0.00050014	9.32e-05	80	31	8.98e-07	5.34e-05
Collection	g__[Prevotella]	soil	0.00833326	0.00156697	80	49	1.1e-06	6.18e-05
Collection	f__Neisseriaceae	soil	0.019273	0.00367533	80	67	1.47e-06	7.84e-05
Collection	o__MIZ46	soil	-0.0010771	0.00020622	80	29	1.6e-06	8.09e-05
Collection	g__Dialister	soil	0.00065417	0.00012684	80	28	2.07e-06	9.95e-05
Collection	o__Acidimicrobiales	soil	-0.001162	0.00022999	80	30	3.11e-06	0.00013982
Collection	f__Lachnospiraceae	soil	0.00174867	0.00037159	80	54	1.17e-05	0.00048267
Collection	g__Leptotrichia	soil	0.0084514	0.00184295	80	48	1.83e-05	0.00072634
Collection	o__Solibacterales	soil	-0.0014238	0.00031898	80	28	2.88e-05	0.00106963
Collection	f__Actinomycetaceae	soil	0.00032084	7.31e-05	80	21	3.79e-05	0.00125619
Collection	o__Rhizobiales	soil	-0.0016397	0.00037372	80	42	3.8e-05	0.00125619
Collection	o__Myxococcales	soil	-0.0038077	0.00089518	80	37	6.15e-05	0.00177735
Collection	f__Micromonosporaceae	soil	-0.0001928	4.59e-05	80	32	7.49e-05	0.00210265
Collection	g__Bacillus	soil	-0.0354004	0.00850718	80	79	8.54e-05	0.00227286
Collection	g__Candidatus Solibacter	soil	-0.0009791	0.00023562	80	25	8.72e-05	0.00228993
Collection	o__Ellin329	soil	-0.0013344	0.00032244	80	22	9.26e-05	0.0023417
Collection	f__Enterobacteriaceae	soil	-0.134919	0.0328673	80	79	0.00010417	0.00250748
Collection	g__Bdellovibrio	soil	-0.0006663	0.00016338	80	22	0.00011432	0.00271937
Collection	g__Gemmata	soil	-0.0008214	0.00020231	80	18	0.00012187	0.00280284
Collection	g__Lautropia	soil	0.0034921	0.00086247	80	36	0.0001267	0.0028785
Collection	f__[Weeksellaceae]	soil	0.0724472	0.0179582	80	69	0.00013338	0.00290314
Collection	f__Bradyrhizobiaceae	soil	-0.0043524	0.00110734	80	68	0.00019085	0.00389799
Collection	f__Haliangiaceae	soil	-0.0002632	6.92e-05	80	20	0.00029204	0.00562391
Collection	c__Alphaproteobacteria	soil	-0.0016796	0.00044764	80	36	0.00034903	0.00655329
Collection	g__Bradyrhizobium	soil	-0.002546	0.00068871	80	61	0.00041967	0.00778506
Collection	f__Ellin6075	soil	-0.0042979	0.00116693	80	43	0.00043911	0.00807165
Collection	g__Mycetocola	soil	-0.0003216	8.87e-05	80	34	0.00053331	0.0093681
Collection	o__Solirubrobacterales	soil	-0.0025973	0.00071717	80	43	0.00053744	0.0093681
Collection	f__Nocardioidaceae	soil	-0.0018837	0.00052439	80	52	0.00059182	0.0102278
Collection	g__Tannerella	soil	0.00044611	0.00012445	80	21	0.00060655	0.0103063
Collection	g__Hyphomicrobium	soil	-0.0010568	0.00029789	80	24	0.00068372	0.0114774
Collection	g__Pedobacter	soil	-0.0004869	0.00013739	80	27	0.0006925	0.0114774
Collection	g__Kaistobacter	soil	-0.0003659	0.00010343	80	34	0.00070691	0.0116209
Collection	g__Phenylobacterium	soil	-0.0005062	0.00014371	80	25	0.00074202	0.0120997
Collection	o__BD7-3	soil	-0.0001173	3.35e-05	80	17	0.00078394	0.0124813
Collection	g__Gemmatimonas	soil	-0.0001238	3.64e-05	80	16	0.00107778	0.015509
Collection	g__Mycobacterium	soil	-0.0020657	0.00061703	80	46	0.00129045	0.0178719
Collection	f__Legionellaceae	soil	-0.0001066	3.22e-05	80	17	0.00146059	0.0194297
Collection	g__Rhodoplanes	soil	-0.0039693	0.00120985	80	44	0.0015889	0.0209985
Collection	f__Sphingomonadaceae	soil	-0.0015835	0.0004877	80	53	0.00176355	0.022427
Collection	f__Micrococcaceae	soil	-0.0013365	0.00041289	80	46	0.00181781	0.0228298
Collection	g__Pseudonocardia	soil	-0.0006106	0.00018915	80	41	0.00186846	0.0231781
Collection	o__SC-I-84	soil	-0.0013159	0.00040873	80	23	0.00191765	0.0236433
Collection	f__Solirubrobacteraceae	soil	-0.0005973	0.0001858	80	27	0.00194582	0.0237014
Collection	g__Ramlibacter	soil	-0.0011837	0.00037414	80	40	0.00227081	0.0262376
Collection	o__Ellin6067	soil	-0.0009703	0.00030953	80	25	0.0024776	0.0269339
Collection	o__WD2101	soil	-0.0014489	0.00046187	80	28	0.00246156	0.0269339
Collection	g__Terracoccus	soil	-0.0002304	7.37e-05	80	31	0.00255501	0.0274799
Collection	g__Pseudomonas	soil	-0.0069125	0.00223631	80	73	0.00282347	0.0291279
Collection	f__Patulibacteraceae	soil	-0.0008332	0.00027186	80	32	0.00305182	0.0303575
Collection	g__Bosea	soil	-0.0006677	0.00021941	80	39	0.0032528	0.0315124
Collection	g__Nocardioides	soil	-0.0004475	0.00014871	80	31	0.00359354	0.0339539
Collection	g__Rubrivivax	soil	-8.05e-05	2.71e-05	80	27	0.00397883	0.036569
Collection	c__Ellin6529	soil	-0.0006003	0.00020216	80	30	0.00403344	0.0369032
Collection	g__Microbacterium	soil	-0.0001019	3.44e-05	80	27	0.00406948	0.0370653
Collection	f__C111	soil	-0.0003469	0.00011784	80	22	0.00434917	0.0390845
Collection	f__Ellin517	soil	-0.0003792	0.00012994	80	17	0.00467576	0.0407995
Collection	g__Afifella	soil	-7.29e-05	2.5e-05	80	15	0.00464218	0.0407995
Collection	g__Devosia	soil	-0.0009687	0.00033104	80	33	0.00456967	0.0407995
Collection	f__Coxiellaceae	soil	-0.0001427	4.96e-05	80	17	0.00531024	0.0441011
Collection	f__Comamonadaceae	soil	-0.0123594	0.00435891	80	77	0.005917	0.0472892
Collection	g__Aggregatibacter	soil	0.00025699	9.11e-05	80	25	0.00618507	0.0481303
Collection	g__Fimbriimonas	soil	-0.0004502	0.00015982	80	23	0.00623259	0.0481303
Collection	g__Roseomonas	soil	-0.0003814	0.00013497	80	25	0.0060849	0.0481303
Collection	g__Selenomonas	soil	0.00027214	9.65e-05	80	24	0.00617285	0.0481303
Collection	f__Cytophagaceae	soil	-0.0006851	0.00024802	80	28	0.00725535	0.0532226
Collection	f__EB1017	soil	-0.0009792	0.0003548	80	22	0.00730507	0.0532226
Collection	f__Myxococcaceae	soil	-0.0001372	5.02e-05	80	17	0.00779978	0.0554988
Collection	g__Solirubrobacter	soil	-0.0007978	0.00029159	80	32	0.00779856	0.0554988
Collection	o__OPB54	soil	-0.0004138	0.00015248	80	33	0.00829747	0.0575437
Collection	p__FBP	soil	-0.0004716	0.00017397	80	20	0.00835915	0.0576867
Collection	c__Betaproteobacteria	soil	-0.0013693	0.00050776	80	24	0.0086909	0.0585767
Collection	f__Sphingobacteriaceae	soil	-0.0023355	0.00086529	80	26	0.00863291	0.0585767
Collection	g__Chthoniobacter	soil	-0.0013723	0.00051252	80	18	0.00915277	0.0602821
Collection	g__Lampropedia	soil	-0.0001395	5.22e-05	80	23	0.00926637	0.0604406
Collection	g__DA101	soil	-0.0054392	0.0020472	80	35	0.00968115	0.0625408
Collection	o__Rhodospirillales	soil	-0.0001135	4.28e-05	80	26	0.00987489	0.0631209
Collection	o__Sphingobacteriales	soil	-0.0027312	0.00103586	80	33	0.0102221	0.0647936
Collection	f__Rhodospirillaceae	soil	-0.0020131	0.00076637	80	33	0.0104966	0.065977
Collection	f__Isosphaeraceae	soil	-0.0003685	0.00014069	80	26	0.0107021	0.0663917
Collection	g__Streptomyces	soil	-0.0004129	0.00015764	80	35	0.0107042	0.0663917
Collection	g__Opitutus	soil	-0.0006782	0.00026161	80	17	0.0115041	0.0688201
Collection	f__Sinobacteraceae	soil	-0.0017494	0.00067705	80	35	0.0117682	0.0693745
Collection	f__Bacillaceae	soil	-0.0038723	0.00151405	80	73	0.0126165	0.0716591
Collection	g__Sediminibacterium	soil	-0.0010631	0.00041662	80	49	0.0128136	0.0725746
Collection	c__Gemm-1	soil	-0.0002985	0.00011726	80	18	0.0130319	0.0727914
Collection	g__Cellulomonas	soil	-0.000267	0.00010572	80	31	0.0137266	0.0756273
Collection	f__A4b	soil	-0.0003218	0.00012792	80	19	0.0140673	0.0768758
Collection	f__UD5	soil	-0.0003971	0.00015898	80	19	0.0147582	0.0793647
Collection	f__Pirellulaceae	soil	-0.000927	0.00037221	80	25	0.0150317	0.0797743
Collection	o__Gaiellales	soil	-0.0002958	0.00012013	80	25	0.0161517	0.0846079
Collection	g__Methylobacterium	soil	-0.0045384	0.00185265	80	62	0.0166976	0.0870167
Collection	f__AK1AB1_02E	soil	-4.63e-05	1.89e-05	80	16	0.0169613	0.0877129
Collection	g__Aquicella	soil	-0.0001117	4.64e-05	80	17	0.0186619	0.0929415
Collection	g__Candidatus Protochlamydia	soil	-6.26e-05	2.61e-05	80	16	0.0190196	0.0940286
Collection	g__Legionella	soil	-0.0001062	4.45e-05	80	18	0.0197014	0.0962227
Collection	g__Asticcacaulis	soil	-0.0003169	0.00013458	80	19	0.0212195	0.101673
Collection	g__Steroidobacter	soil	-0.0003313	0.00014101	80	19	0.0214851	0.10246
Collection	g__Arthrobacter	soil	-0.0001221	5.22e-05	80	25	0.022056	0.103277
Collection	g__Phycicoccus	soil	-3.78e-05	1.62e-05	80	25	0.0225616	0.104154
Collection	o__Cytophagales	soil	-0.0001305	5.64e-05	80	16	0.0234901	0.107217
Collection	g__Sphingomonas	soil	-0.0074637	0.00323952	80	72	0.0240741	0.108899
Collection	g__Paenibacillus	soil	-0.0014743	0.00064361	80	47	0.024872	0.11151
Collection	f__Ellin5301	soil	-0.0005952	0.00026375	80	26	0.0270159	0.118182
Collection	o__[Pedosphaerales]	soil	-0.0006578	0.0002927	80	16	0.0276303	0.120147
Collection	g__Lapillicoccus	soil	-0.0008397	0.00037654	80	39	0.0288129	0.123145
Collection	g__Planctomyces	soil	-0.0006305	0.00028281	80	19	0.0288679	0.123145
Collection	f__Gaiellaceae	soil	-0.0022215	0.00099731	80	38	0.0289968	0.123435
Collection	f__Gemmataceae	soil	-0.000577	0.00026137	80	23	0.0304052	0.128082
Collection	o__Bacillales	soil	-0.0019677	0.0008921	80	64	0.0305497	0.128364
Collection	f__Erythrobacteraceae	soil	-0.0004341	0.00019765	80	28	0.0312303	0.129933
Collection	g__Cohnella	soil	-0.000281	0.00012805	80	27	0.0314036	0.130386
Collection	o__Actinomycetales	soil	-0.0018715	0.00085618	80	45	0.0320299	0.131903
Collection	f__Hyphomicrobiaceae	soil	-0.0012549	0.00057708	80	31	0.0329044	0.134611
Collection	f__Nakamurellaceae	soil	-0.0006675	0.00030712	80	30	0.0329949	0.134611
Collection	g__Actinotalea	soil	-9.97e-05	4.62e-05	80	23	0.0341552	0.137027
Collection	f__[Chthoniobacteraceae]	soil	-0.0012904	0.00060028	80	29	0.0348888	0.139004
Collection	g__Corynebacterium	soil	-0.024916	0.0116404	80	77	0.0356579	0.14
Collection	f__Streptomycetaceae	soil	-0.0001688	7.9e-05	80	22	0.0359839	0.140462
Collection	o__Sphingomonadales	soil	-0.0005353	0.00025225	80	33	0.0372238	0.143639
Collection	f__Planococcaceae	soil	-0.0008341	0.00039425	80	58	0.0377923	0.144961
Collection	g__Eikenella	soil	6.26e-05	2.96e-05	80	21	0.0378533	0.144961
Collection	g__Hymenobacter	soil	-0.0007591	0.00036005	80	52	0.0384388	0.146925
Collection	f__Beijerinckiaceae	soil	-0.0007857	0.0003758	80	32	0.0400233	0.150984
Collection	o__iii1-15	soil	-0.0044807	0.00214566	80	34	0.0402609	0.151408
Collection	g__Pilimelia	soil	-0.0003615	0.00017392	80	32	0.0411727	0.153035
Collection	g__Burkholderia	soil	-0.0023658	0.00114434	80	34	0.0422398	0.155332
Collection	g__Geodermatophilus	soil	-0.0004477	0.0002165	80	29	0.0421913	0.155332
Collection	o__Rickettsiales	soil	-9.68e-05	4.68e-05	80	21	0.0421299	0.155332
Collection	g__Segetibacter	soil	-0.0035762	0.0017547	80	28	0.0451694	0.164412
Collection	o__Spirobacillales	soil	-0.0003269	0.00016078	80	16	0.045652	0.164836
Collection	f__Pseudonocardiaceae	soil	-0.0002041	0.00010083	80	26	0.0466281	0.166269
Collection	f__Sporichthyaceae	soil	-0.0001888	9.33e-05	80	27	0.0467217	0.166269
Collection	g__Planifilum	soil	-0.0006097	0.00030356	80	37	0.0483028	0.169858
Collection	g__Adhaeribacter	soil	-9.37e-05	4.72e-05	80	17	0.0508993	0.175124
Collection	g__Aeromicrobium	soil	-0.0001263	6.37e-05	80	25	0.0510193	0.175124
Collection	g__Ellin506	soil	-0.0011815	0.00059443	80	20	0.0505987	0.175124
Collection	p__WPS-2	soil	-0.0001876	9.46e-05	80	21	0.0510373	0.175124
Collection	f__Acetobacteraceae	soil	-0.0021073	0.00106405	80	46	0.0514271	0.175722
Collection	f__Solibacteraceae	soil	-0.0004231	0.00021511	80	27	0.0529713	0.178513
Collection	g__Flavisolibacter	soil	-0.0026069	0.0013272	80	33	0.05331	0.179356
Collection	g__Acinetobacter	soil	-0.0014557	0.00074968	80	68	0.0560211	0.185437
Collection	g__Williamsia	soil	-0.0003582	0.00018447	80	24	0.0560346	0.185437
Collection	c__C0119	soil	-0.0002983	0.0001542	80	18	0.0568974	0.187372
Collection	f__Armatimonadaceae	soil	-9.35e-05	4.86e-05	80	20	0.0581817	0.189839
Collection	o__Gemmatimonadales	soil	-0.0004805	0.00024968	80	22	0.0582097	0.189839
Collection	c__OPB56	soil	-0.0001255	6.54e-05	80	16	0.0591204	0.190353
Collection	g__Shinella	soil	-7.67e-05	4.02e-05	80	24	0.0603602	0.192505
Collection	g__Microbispora	soil	-0.0002731	0.00014369	80	29	0.0613516	0.194924
Collection	g__Virgibacillus	soil	-0.0071675	0.00377274	80	77	0.0614079	0.194924
Collection	f__Xanthomonadaceae	soil	-0.001162	0.00061512	80	53	0.0628501	0.198257
Collection	f__Paenibacillaceae	soil	-0.0004205	0.00022509	80	26	0.0657416	0.202636
Collection	f__Phyllobacteriaceae	soil	-0.0004536	0.00024263	80	35	0.0655625	0.202636
Collection	g__Micrococcus	soil	-0.0013501	0.00072612	80	49	0.0670205	0.205326
Collection	f__0319-6G20	soil	-0.0003229	0.00017384	80	35	0.067262	0.205755
Collection	g__Chryseobacterium	soil	-0.0002953	0.00016064	80	46	0.0700865	0.211515
Collection	g__Clostridium	soil	-0.0497035	0.0271181	80	79	0.0709021	0.213376
Collection	g__Frigoribacterium	soil	-4.1e-05	2.24e-05	80	19	0.0709144	0.213376
Collection	f__Methylocystaceae	soil	-0.0016606	0.00090852	80	38	0.0716678	0.215323
Collection	g__Erythrobacter	soil	-0.0001863	0.00010217	80	19	0.0723039	0.21659
Collection	f__Rhizobiaceae	soil	-0.0005311	0.00029359	80	40	0.0745517	0.221648
Collection	g__Peredibacter	soil	-0.0001029	5.73e-05	80	16	0.076577	0.22429
Collection	g__Turicibacter	soil	-0.0005262	0.00029274	80	24	0.0763814	0.22429
Collection	f__mb2424	soil	-0.000172	9.62e-05	80	16	0.0778937	0.225296
Collection	f__Piscirickettsiaceae	soil	-0.0004712	0.00026346	80	16	0.0778681	0.225296
Collection	g__Actinoplanes	soil	-7.72e-05	4.31e-05	80	18	0.0775056	0.225296
Collection	f__Alcaligenaceae	soil	-4.1e-05	2.3e-05	80	19	0.0782562	0.225373
Collection	c__ML635J-21	soil	-0.0003457	0.00019469	80	19	0.0799834	0.228234
Collection	g__Iamia	soil	-0.0001592	9.02e-05	80	18	0.0817779	0.230943
Collection	g__Kocuria	soil	-0.0009816	0.00055727	80	42	0.0823465	0.23127
Collection	o__Sva0725	soil	-0.0001932	0.00011142	80	20	0.0870902	0.241385
Collection	g__Dokdonella	soil	-5.71e-05	3.3e-05	80	16	0.087637	0.241714
Collection	g__Cellvibrio	soil	-0.0002478	0.00014341	80	17	0.0882619	0.24281
Collection	o__N1423WL	soil	-0.0005452	0.00031698	80	14	0.0896879	0.244735
Collection	g__Sphingobium	soil	-0.0004594	0.00026831	80	45	0.0910759	0.247214
Collection	f__Frankiaceae	soil	-0.0006594	0.00038678	80	22	0.0924715	0.248551
Collection	f__Sporolactobacillaceae	soil	-0.000469	0.00027481	80	26	0.092132	0.248551
Collection	f__Microbacteriaceae	soil	-0.0012773	0.00075099	80	43	0.0932305	0.249685
PMA.treatment	f__Enterobacteriaceae	PMA_treated	-0.0555265	0.0141917	64	64	0.000242265	0.00354971
PMA.treatment	g__Enhydrobacter	PMA_treated	0.000580141	0.000181797	64	23	0.00228835	0.0172909
PMA.treatment	g__Clostridium	PMA_treated	0.0321089	0.0101182	64	64	0.00241084	0.0179778
PMA.treatment	f__Erysipelotrichaceae	PMA_treated	8.66572e-05	2.81044e-05	64	13	0.00313118	0.0207718
PMA.treatment	f__Lachnospiraceae	PMA_treated	0.000686408	0.000229571	64	52	0.004089	0.025238
PMA.treatment	g__Pasteurella	PMA_treated	1.72241e-05	6.29348e-06	64	9	0.00822111	0.0417246
PMA.treatment	g__Blastococcus	PMA_treated	0.000142095	5.23379e-05	64	24	0.00871705	0.0435516
PMA.treatment	g__Kytococcus	PMA_treated	3.12917e-05	1.19112e-05	64	12	0.0109995	0.051484
PMA.treatment	f__Bradyrhizobiaceae	PMA_treated	-0.00155036	0.000594259	64	55	0.0115351	0.052961
PMA.treatment	g__Planifilum	PMA_treated	-0.000489928	0.000188039	64	35	0.0116389	0.0532925
PMA.treatment	g__Eikenella	PMA_treated	4.7687e-05	1.83224e-05	64	21	0.011724	0.0533919
PMA.treatment	g__Turicibacter	PMA_treated	-0.000383614	0.000148533	64	21	0.0123486	0.0544086
PMA.treatment	g__Propionivibrio	PMA_treated	3.53961e-05	1.38166e-05	64	29	0.0130323	0.0566762
PMA.treatment	g__Wautersiella	PMA_treated	7.15487e-06	2.81169e-06	64	11	0.0136213	0.0582535
PMA.treatment	o__Streptophyta	PMA_treated	0.00849347	0.00333645	64	49	0.0135873	0.0582535
PMA.treatment	g__Lactococcus	PMA_treated	0.00065942	0.000272741	64	33	0.0187794	0.0750161
PMA.treatment	g__Treponema	PMA_treated	0.000398886	0.000165399	64	19	0.0190661	0.0759488
PMA.treatment	g__Weissella	PMA_treated	7.2053e-05	3.03455e-05	64	21	0.020906	0.079879
PMA.treatment	f__Clostridiaceae	PMA_treated	-0.00119416	0.000513426	64	52	0.0235433	0.0873797
PMA.treatment	g__Nelumbo	PMA_treated	0.000283004	0.00012232	64	21	0.0242524	0.0888035
PMA.treatment	g__Bacillus	PMA_treated	0.00944882	0.00410188	64	64	0.0248525	0.090057
PMA.treatment	g__Faecalibacterium	PMA_treated	0.000586875	0.000256908	64	14	0.0260269	0.0927174
PMA.treatment	g__Campylobacter	PMA_treated	0.000410602	0.000182203	64	29	0.0280205	0.0973494
PMA.treatment	f__Aeromonadaceae	PMA_treated	0.000134467	6.00174e-05	64	42	0.0289056	0.0998073
PMA.treatment	g__Peptoniphilus	PMA_treated	0.000578039	0.000259094	64	22	0.0295618	0.101449
PMA.treatment	g__Selenomonas	PMA_treated	0.000133102	5.97726e-05	64	24	0.0298576	0.101636
PMA.treatment	g__Microbispora	PMA_treated	-0.000197982	8.90117e-05	64	29	0.0300399	0.102051
PMA.treatment	g__Rhodococcus	PMA_treated	0.000225825	0.000102103	64	41	0.030938	0.103846
PMA.treatment	g__Finegoldia	PMA_treated	0.000809224	0.000373692	64	20	0.0344762	0.110442
PMA.treatment	g__Jeotgalicoccus	PMA_treated	4.69123e-05	2.19609e-05	64	13	0.0368968	0.115991
PMA.treatment	g__Rheinheimera	PMA_treated	5.41337e-06	2.55864e-06	64	7	0.0386734	0.118991
PMA.treatment	g__WAL_1855D	PMA_treated	1.1002e-05	5.20141e-06	64	5	0.0387193	0.118991
PMA.treatment	g__Thermus	PMA_treated	-7.10285e-05	3.39618e-05	64	30	0.0408795	0.123004
PMA.treatment	f__Planococcaceae	PMA_treated	-0.000495218	0.000240659	64	45	0.0441177	0.129699
PMA.treatment	g__Dermabacter	PMA_treated	0.000137885	6.69945e-05	64	11	0.0440786	0.129699
PMA.treatment	g__Dialister	PMA_treated	0.000145849	7.11241e-05	64	26	0.0448315	0.131148
PMA.treatment	f__Micromonosporaceae	PMA_treated	5.66598e-05	2.84533e-05	64	32	0.051162	0.14392
PMA.treatment	g__Facklamia	PMA_treated	0.000339963	0.000171117	64	13	0.0516838	0.144663
PMA.treatment	f__Oxalobacteraceae	PMA_treated	0.0239868	0.0122028	64	62	0.0541304	0.150068
PMA.treatment	g__Gardnerella	PMA_treated	3.22369e-05	1.64497e-05	64	9	0.05484	0.151733
PMA.treatment	g__Streptomyces	PMA_treated	-0.000190387	9.76295e-05	64	34	0.0560029	0.154191
PMA.treatment	g__Actinomycetospora	PMA_treated	7.42737e-05	3.81204e-05	64	26	0.0562113	0.154261
PMA.treatment	g__Bacteroides	PMA_treated	0.00040372	0.000207454	64	17	0.056497	0.154735
PMA.treatment	g__Micrococcus	PMA_treated	0.000715814	0.000368972	64	38	0.057244	0.155826
PMA.treatment	o__Clostridiales	PMA_treated	-0.00131183	0.000680608	64	54	0.0588273	0.158598
PMA.treatment	g__Capnocytophaga	PMA_treated	0.000110188	5.72608e-05	64	28	0.0592249	0.158811
PMA.treatment	g__Tetragenococcus	PMA_treated	-0.000314383	0.000163429	64	32	0.0593096	0.158811
PMA.treatment	g__Paracoccus	PMA_treated	0.000658394	0.00034912	64	33	0.0643239	0.168497
PMA.treatment	g__Sediminibacterium	PMA_treated	0.000294256	0.000156077	64	42	0.064399	0.168497
PMA.treatment	g__Lautropia	PMA_treated	0.000998065	0.00053426	64	35	0.0667984	0.172896
PMA.treatment	g__Sphingomonas	PMA_treated	0.00352099	0.00193672	64	57	0.0742279	0.186399
PMA.treatment	o__DS-18	PMA_treated	9.30841e-05	5.14364e-05	64	15	0.0755258	0.188535
PMA.treatment	g__Bradyrhizobium	PMA_treated	-0.000579965	0.000322104	64	49	0.0769744	0.190738
PMA.treatment	g__Exiguobacterium	PMA_treated	8.98444e-05	5.0342e-05	64	24	0.079543	0.194246
PMA.treatment	g__Pilimelia	PMA_treated	-0.000185349	0.000104108	64	30	0.080255	0.195419
PMA.treatment	f__Bacillaceae	PMA_treated	-0.00137529	0.000775515	64	58	0.0814145	0.197103
PMA.treatment	g__Sporosarcina	PMA_treated	-0.00105983	0.000599516	64	35	0.0823535	0.198805
PMA.treatment	g__Blautia	PMA_treated	0.00020151	0.00011484	64	19	0.084591	0.201892
PMA.treatment	g__Brevibacterium	PMA_treated	0.000279762	0.000161034	64	16	0.0876444	0.207417
PMA.treatment	g__Anaerococcus	PMA_treated	0.00393808	0.00232215	64	29	0.0952708	0.220813
PMA.treatment	f__Porphyromonadaceae	PMA_treated	-0.00640667	0.00379719	64	36	0.0969341	0.22316
PMA.treatment	g__Actinomyces	PMA_treated	0.0033539	0.00198791	64	54	0.0969456	0.22316
PMA.treatment	o__Myxococcales	PMA_treated	0.000936183	0.000554526	64	34	0.0967323	0.22316
PMA.treatment	g__Paenibacillus	PMA_treated	-0.000668054	0.00039869	64	45	0.0991954	0.22647
PMA.treatment	g__Kocuria	PMA_treated	0.000390189	0.000237908	64	35	0.1064	0.236523
PMA.treatment	g__Ruminococcus	PMA_treated	0.000217826	0.000134408	64	23	0.110521	0.241541
PMA.treatment	f__Pasteurellaceae	PMA_treated	-0.000778617	0.000487271	64	29	0.115497	0.249384
Spike.in	f__Enterobacteriaceae	E.coli Spike in	-0.105108	0.0141917	64	64	6.08452e-10	2.05048e-07
Spike.in	g__Clostridium	E.coli Spike in	-0.0376957	0.0101182	64	64	0.000443616	0.00533924
Spike.in	g__Streptococcus	E.coli Spike in	0.0372759	0.0122111	64	64	0.00342056	0.0223397
Spike.in	g__Polaromonas	E.coli Spike in	0.000183458	6.43694e-05	64	34	0.00604216	0.0341645
Spike.in	f__Comamonadaceae	E.coli Spike in	0.00684891	0.00260277	64	62	0.0108758	0.0513326
Spike.in	o__Clostridiales	E.coli Spike in	0.00161866	0.000680608	64	54	0.02071	0.0798543
Spike.in	f__Sporichthyaceae	E.coli Spike in	0.000133991	5.78072e-05	64	27	0.0240036	0.0885036
Spike.in	f__Ruminococcaceae	E.coli Spike in	0.000278818	0.000125075	64	34	0.0296883	0.101579
Spike.in	g__Pseudomonas	E.coli Spike in	0.001653	0.000791915	64	58	0.0412603	0.123488
Spike.in	g__Micrococcus	E.coli Spike in	0.000752169	0.000368972	64	38	0.046062	0.132901
Spike.in	o__OPB54	E.coli Spike in	0.000185655	9.44561e-05	64	33	0.054149	0.150068
Spike.in	f__Oxalobacteraceae	E.coli Spike in	0.023826	0.0122028	64	62	0.0557109	0.153638
Spike.in	g__Sphingomonas	E.coli Spike in	0.00361115	0.00193672	64	57	0.0673051	0.173674
Spike.in	g__Acinetobacter	E.coli Spike in	0.00060192	0.00032891	64	54	0.0723834	0.183408
Spike.in	g__Virgibacillus	E.coli Spike in	0.00180603	0.000988351	64	62	0.072798	0.183971
Spike.in	g__Paracoccus	E.coli Spike in	0.000636014	0.00034912	64	33	0.0736488	0.185221
Spike.in	g__Cytophaga	E.coli Spike in	0.000168086	9.40877e-05	64	21	0.0792481	0.194198
Spike.in	f__S24-7	E.coli Spike in	0.000170411	9.69914e-05	64	30	0.0842003	0.201245
Spike.in	g__Ramlibacter	E.coli Spike in	0.000396992	0.000231629	64	36	0.0918842	0.215035
Spike.in	f__C111	E.coli Spike in	0.000124189	7.2998e-05	64	22	0.0942477	0.219188
Spike.in	f__Caulobacteraceae	E.coli Spike in	0.00175213	0.00103202	64	49	0.0949125	0.220286
Spike.in	p__WPS-2	E.coli Spike in	9.85424e-05	5.83844e-05	64	20	0.096817	0.22316
Spike.in	g__Coprococcus	E.coli Spike in	0.000190645	0.000113778	64	31	0.0992028	0.22647
Spike.in	g__Kaistobacter	E.coli Spike in	9.07756e-05	5.41324e-05	64	31	0.0989404	0.22647
Spike.in	g__Corynebacterium	E.coli Spike in	0.0111242	0.00675309	64	62	0.104908	0.235505
Spike.in	g__Enhydrobacter	E.coli Spike in	0.000297086	0.000181797	64	23	0.107641	0.238221

## Sheet: Source_PMA
feature	Sample	PMA	coef	stderr	N	N.not.0	pval	qval
g__Polaromonas	soil	No	0.00390566	0.000275441	64	34	3.51048e-20	5.91948e-17
g__Polaromonas	soil	Yes	0.00387401	0.000275441	64	34	5.01863e-20	5.91948e-17
f__Chitinophagaceae	soil	Yes	0.0729333	0.00584682	64	41	8.4095e-18	6.61267e-15
o__Myxococcales	soil	No	0.0239532	0.00209577	64	34	2.89791e-16	1.70904e-13
f__Chitinophagaceae	soil	No	0.0659036	0.00584682	64	41	5.00245e-16	2.36016e-13
o__MIZ46	soil	No	0.00523312	0.00051846	64	27	3.25877e-14	1.28124e-11
o__Acidimicrobiales	soil	No	0.00589662	0.000586693	64	29	3.80687e-14	1.28292e-11
o__MIZ46	soil	Yes	0.0051074	0.00051846	64	27	7.85228e-14	2.31544e-11
o__Acidimicrobiales	soil	Yes	0.00549674	0.000586693	64	29	4.59443e-13	1.20425e-10
f__Haliangiaceae	soil	No	0.00158753	0.000170342	64	20	5.5116e-13	1.30019e-10
o__Ellin329	soil	No	0.00735666	0.000814421	64	20	1.59504e-12	3.42063e-10
g__Gemmata	soil	No	0.00456105	0.000513248	64	17	2.75133e-12	5.40866e-10
o__Solibacterales	soil	Yes	0.00712742	0.000806306	64	28	3.27942e-12	5.95088e-10
o__Solibacterales	soil	No	0.00697334	0.000806306	64	28	6.70455e-12	1.12972e-09
g__Bdellovibrio	soil	No	0.00348029	0.000411267	64	21	1.34895e-11	2.12145e-09
g__Candidatus Solibacter	soil	No	0.00488564	0.00059335	64	23	3.19075e-11	4.70437e-09
o__Rhizobiales	soil	No	0.00765517	0.000944491	64	37	5.19423e-11	7.20776e-09
o__Ellin329	soil	Yes	0.00655597	0.000814421	64	20	6.40119e-11	8.38912e-09
g__Gemmata	soil	Yes	0.00407277	0.000513248	64	17	9.88027e-11	1.22671e-08
o__BD7-3	soil	No	0.000660105	8.36115e-05	64	17	1.15152e-10	1.35822e-08
g__Bdellovibrio	soil	Yes	0.00322906	0.000411267	64	21	1.3576e-10	1.52504e-08
g__Candidatus Solibacter	soil	Yes	0.00460409	0.00059335	64	23	1.92518e-10	2.06432e-08
f__Micromonosporaceae	soil	No	0.000858169	0.000112233	64	32	2.95941e-10	3.03532e-08
o__Myxococcales	soil	Yes	0.0159294	0.00209577	64	34	3.51915e-10	3.45903e-08
f__Ellin6075	soil	No	0.0218492	0.00294159	64	38	6.79608e-10	6.41278e-08
g__Phenylobacterium	soil	No	0.00269349	0.000364923	64	24	8.11871e-10	7.09335e-08
o__Rhizobiales	soil	Yes	0.00697318	0.000944491	64	37	8.0564e-10	7.09335e-08
c__Alphaproteobacteria	soil	Yes	0.00827358	0.00113088	64	34	1.03938e-09	8.75677e-08
o__Solirubrobacterales	soil	Yes	0.0131123	0.00182114	64	39	1.61634e-09	1.31481e-07
c__Alphaproteobacteria	soil	No	0.00811605	0.00113088	64	34	1.7662e-09	1.38882e-07
g__Microbacterium	soil	No	0.000608422	8.57915e-05	64	27	2.43986e-09	1.85666e-07
f__Ellin6075	soil	Yes	0.0205163	0.00294159	64	38	3.81247e-09	2.72534e-07
f__Haliangiaceae	soil	Yes	0.00118919	0.000170342	64	20	3.71749e-09	2.72534e-07
g__Gemmatimonas	soil	Yes	0.000629945	9.16062e-05	64	16	5.53219e-09	3.83836e-07
o__Ellin6067	soil	No	0.00533178	0.000781124	64	22	6.71253e-09	4.52424e-07
g__Phenylobacterium	soil	Yes	0.00246927	0.000364923	64	24	8.40688e-09	5.50884e-07
f__Myxococcaceae	soil	No	0.000845811	0.000125372	64	17	9.07553e-09	5.78626e-07
g__Blastococcus	computer screen	No	0.00113009	0.000168543	64	24	1.0618e-08	6.59154e-07
o__SC-I-84	soil	Yes	0.00688023	0.00103322	64	22	1.26444e-08	7.64825e-07
o__BD7-3	soil	Yes	0.000551461	8.36115e-05	64	17	1.60884e-08	9.48813e-07
g__Hyphomicrobium	soil	No	0.00490999	0.000746253	64	24	1.70939e-08	9.83525e-07
g__Pedobacter	soil	No	0.00226635	0.000345173	64	27	1.80037e-08	1.01121e-06
f__Legionellaceae	soil	No	0.000531985	8.12148e-05	64	17	1.90928e-08	1.04744e-06
g__Rubrivivax	soil	Yes	0.000411604	6.33894e-05	64	23	2.3701e-08	1.2707e-06
f__Legionellaceae	soil	Yes	0.000526841	8.12148e-05	64	17	2.4269e-08	1.27223e-06
o__Actinomycetales	soil	Yes	0.0065791	0.00101735	64	38	2.61891e-08	1.34304e-06
g__Gemmatimonas	soil	No	0.000591463	9.16062e-05	64	16	2.72302e-08	1.36673e-06
o__Solirubrobacterales	soil	No	0.0117413	0.00182114	64	39	2.82116e-08	1.38648e-06
g__Terracoccus	soil	Yes	0.00119676	0.00018616	64	28	3.02601e-08	1.45681e-06
o__WD2101	soil	No	0.00747802	0.00117107	64	25	3.56128e-08	1.68021e-06
g__Hyphomicrobium	soil	Yes	0.00475485	0.000746253	64	24	3.75439e-08	1.73659e-06
f__Nocardioidaceae	soil	Yes	0.008307	0.0013105	64	45	4.25024e-08	1.92814e-06
f__Micromonosporaceae	soil	Yes	0.000710559	0.000112233	64	32	4.37537e-08	1.94745e-06
g__Bosea	soil	No	0.00270207	0.000427679	64	34	4.59744e-08	1.97188e-06
g__Pedobacter	soil	Yes	0.00218094	0.000345173	64	27	4.59065e-08	1.97188e-06
o__WD2101	soil	Yes	0.00737543	0.00117107	64	25	4.9576e-08	2.08839e-06
g__Bacillus	saliva	No	-0.0995895	0.0158967	64	64	5.61916e-08	2.28545e-06
g__Bacillus	saliva	Yes	-0.0996582	0.0158967	64	64	5.52842e-08	2.28545e-06
f__Solirubrobacteraceae	soil	Yes	0.00292877	0.000470611	64	26	6.56943e-08	2.62666e-06
c__Ellin6529	soil	No	0.00316029	0.000510739	64	28	7.51336e-08	2.90557e-06
o__SC-I-84	soil	No	0.00639435	0.00103322	64	22	7.4822e-08	2.90557e-06
g__Opitutus	soil	No	0.00401929	0.000651787	64	16	8.13389e-08	3.09481e-06
g__Kaistobacter	soil	No	0.00137801	0.000223723	64	31	8.3549e-08	3.12845e-06
g__Mycobacterium	soil	Yes	0.00951	0.00154687	64	42	8.72536e-08	3.21611e-06
g__Nocardioides	soil	Yes	0.00229363	0.000374192	64	29	9.34903e-08	3.39298e-06
f__Ellin517	soil	No	0.00200279	0.000326992	64	17	9.51439e-08	3.40067e-06
g__Bosea	soil	Yes	0.00261019	0.000427679	64	34	1.03233e-07	3.63473e-06
o__Ellin6067	soil	Yes	0.00475161	0.000781124	64	22	1.11334e-07	3.8623e-06
o__DS-18	soil	No	0.00118648	0.000195212	64	15	1.13508e-07	3.88067e-06
g__Bacillus	soil	No	-0.0964259	0.0158967	64	64	1.1879e-07	4.00324e-06
g__Bacillus	soil	Yes	-0.0958642	0.0158967	64	64	1.35624e-07	4.50614e-06
f__Sphingobacteriaceae	soil	No	0.0131458	0.00219274	64	26	1.5479e-07	5.07153e-06
p__FBP	soil	Yes	0.00256672	0.000432272	64	20	1.91902e-07	6.20131e-06
f__Coxiellaceae	soil	No	0.00074147	0.0001256	64	17	2.18165e-07	6.86201e-06
o__Sphingobacteriales	soil	No	0.0153662	0.00260159	64	28	2.15674e-07	6.86201e-06
g__Rhodoplanes	soil	No	0.0179714	0.00305215	64	39	2.3099e-07	7.16981e-06
g__Afifella	soil	No	0.000368445	6.28545e-05	64	15	2.54755e-07	7.80478e-06
f__Pirellulaceae	soil	No	0.00543957	0.0009287	64	23	2.59243e-07	7.84043e-06
f__Solirubrobacteraceae	soil	No	0.00274814	0.000470611	64	26	2.76908e-07	8.16532e-06
g__Rhodoplanes	soil	Yes	0.0178231	0.00305215	64	39	2.7688e-07	8.16532e-06
f__Sphingomonadaceae	soil	No	0.00654819	0.00112692	64	42	3.08312e-07	8.9791e-06
f__Patulibacteraceae	soil	Yes	0.00391913	0.000676197	64	30	3.25808e-07	9.37295e-06
f__Coxiellaceae	soil	Yes	0.000726444	0.0001256	64	17	3.40769e-07	9.56994e-06
o__Actinomycetales	soil	No	0.00588677	0.00101735	64	38	3.3751e-07	9.56994e-06
g__Chthoniobacter	soil	No	0.00744565	0.00129071	64	17	3.60477e-07	1.00043e-05
g__Devosia	soil	Yes	0.00423635	0.000738713	64	32	4.08851e-07	1.12149e-05
f__Sphingomonadaceae	soil	Yes	0.00645835	0.00112692	64	42	4.14696e-07	1.12445e-05
g__Actinomycetospora	soil	No	0.000864062	0.000151556	64	26	4.63002e-07	1.24116e-05
g__Fimbriimonas	soil	Yes	0.00230205	0.000404578	64	23	4.82742e-07	1.27954e-05
g__Devosia	soil	No	0.00418849	0.000738713	64	32	5.19912e-07	1.36275e-05
g__DA101	soil	No	0.0292348	0.00516467	64	30	5.38426e-07	1.39577e-05
f__AK1AB1_02E	soil	No	0.000265745	4.74738e-05	64	16	6.79282e-07	1.74177e-05
g__Fimbriimonas	soil	No	0.00226104	0.000404578	64	23	7.0245e-07	1.78181e-05
f__Ellin517	soil	Yes	0.00181819	0.000326992	64	17	7.79687e-07	1.94958e-05
g__Ramlibacter	soil	No	0.00525048	0.000944588	64	36	7.85121e-07	1.94958e-05
c__Betaproteobacteria	soil	No	0.0071094	0.00128269	64	23	8.32581e-07	2.00587e-05
g__Kaistobacter	soil	Yes	0.00124032	0.000223723	64	31	8.2824e-07	2.00587e-05
g__Mycobacterium	soil	No	0.00857325	0.00154687	64	42	8.333e-07	2.00587e-05
f__C111	soil	Yes	0.00167522	0.000303377	64	22	8.98463e-07	2.14088e-05
f__EB1017	soil	Yes	0.00493454	0.00089568	64	21	9.41247e-07	2.2204e-05
c__Ellin6529	soil	Yes	0.00276216	0.000510739	64	28	1.36435e-06	3.18665e-05
f__EB1017	soil	No	0.00483231	0.00089568	64	21	1.4311e-06	3.30977e-05
g__Roseomonas	soil	Yes	0.00184508	0.000343043	64	23	1.52052e-06	3.48243e-05
f__Cytophagaceae	soil	No	0.00332221	0.000618576	64	25	1.5647e-06	3.54916e-05
f__Rhodospirillaceae	soil	Yes	0.0103941	0.00193772	64	32	1.60329e-06	3.56808e-05
g__Rubrivivax	soil	No	0.00034017	6.33894e-05	64	23	1.58992e-06	3.56808e-05
f__A4b	soil	No	0.00172624	0.000322983	64	19	1.72093e-06	3.7941e-05
g__Solirubrobacter	soil	Yes	0.00387318	0.000732657	64	29	2.12788e-06	4.64784e-05
g__Afifella	soil	Yes	0.000332049	6.28545e-05	64	15	2.15642e-06	4.65707e-05
g__Steroidobacter	soil	No	0.00188557	0.000357055	64	18	2.17159e-06	4.65707e-05
f__Sphingobacteriaceae	soil	Yes	0.0115256	0.00219274	64	26	2.3752e-06	5.04784e-05
f__Micrococcaceae	soil	Yes	0.0053774	0.00102665	64	42	2.53986e-06	5.34957e-05
g__Ramlibacter	soil	Yes	0.00494194	0.000944588	64	36	2.59556e-06	5.40192e-05
g__Streptococcus	saliva	Yes	0.2779	0.053133	64	64	2.61051e-06	5.40192e-05
c__Betaproteobacteria	soil	Yes	0.00665712	0.00128269	64	23	3.02134e-06	6.12973e-05
f__Patulibacteraceae	soil	No	0.00350239	0.000676197	64	30	3.13757e-06	6.12973e-05
g__Candidatus Protochlamydia	soil	Yes	0.00033881	6.53977e-05	64	16	3.12366e-06	6.12973e-05
g__Catonella	saliva	No	0.000819646	0.000157993	64	24	3.04449e-06	6.12973e-05
g__Chthoniobacter	soil	Yes	0.00668453	0.00129071	64	17	3.14412e-06	6.12973e-05
g__DA101	soil	Yes	0.0267661	0.00516467	64	30	3.10369e-06	6.12973e-05
g__Planctomyces	soil	No	0.00367805	0.000709648	64	19	3.09946e-06	6.12973e-05
f__UD5	soil	No	0.00208376	0.000403455	64	19	3.30957e-06	6.39941e-05
o__Spirobacillales	soil	No	0.00207751	0.000402631	64	16	3.36966e-06	6.46263e-05
f__Micrococcaceae	soil	No	0.00527986	0.00102665	64	42	3.58322e-06	6.81679e-05
f__C111	soil	No	0.00155073	0.000303377	64	22	4.01137e-06	7.47142e-05
f__Myxococcaceae	soil	Yes	0.000640752	0.000125372	64	17	4.02234e-06	7.47142e-05
g__Terracoccus	soil	No	0.000952045	0.00018616	64	28	3.97424e-06	7.47142e-05
c__Gemm-1	soil	Yes	0.00148665	0.000292755	64	17	4.52438e-06	8.33829e-05
g__Campylobacter	saliva	No	0.00347989	0.000687009	64	29	4.73882e-06	8.6658e-05
g__Legionella	soil	No	0.000566752	0.000112253	64	17	5.0265e-06	9.12117e-05
f__Sinobacteraceae	soil	No	0.00859856	0.00170898	64	32	5.35238e-06	9.63836e-05
o__Cytophagales	soil	Yes	0.000715451	0.000142897	64	16	5.84704e-06	0.000104494
f__Cytophagaceae	soil	Yes	0.00308646	0.000618576	64	25	6.21662e-06	0.00010944
p__WPS-2	soil	No	0.00119753	0.000239925	64	20	6.17992e-06	0.00010944
g__Microbacterium	soil	Yes	0.000427835	8.57915e-05	64	27	6.27733e-06	0.000109691
f__Nocardioidaceae	soil	No	0.00651866	0.0013105	64	45	6.57031e-06	0.000113966
f__Rhodospirillaceae	soil	No	0.00958991	0.00193772	64	32	7.18678e-06	0.000123749
g__Micrococcus	computer screen	No	0.00717385	0.00145116	64	38	7.32992e-06	0.000125299
g__Aquicella	soil	Yes	0.000577902	0.000117378	64	17	7.8754e-06	0.000133655
f__A4b	soil	Yes	0.00158481	0.000322983	64	19	8.35549e-06	0.000140135
g__Nocardioides	soil	No	0.00183583	0.000374192	64	29	8.37602e-06	0.000140135
g__Roseomonas	soil	No	0.00167329	0.000343043	64	23	9.26403e-06	0.0001539
o__Gaiellales	soil	Yes	0.00147641	0.000303862	64	25	9.90919e-06	0.000163467
g__Aquicella	soil	No	0.000569612	0.000117378	64	17	1.01237e-05	0.000165846
o__Sphingobacteriales	soil	Yes	0.0125988	0.00260159	64	28	1.04903e-05	0.000170667
g__Asticcacaulis	soil	No	0.00163485	0.000338906	64	18	1.12144e-05	0.000181198
g__Arthrobacter	soil	Yes	0.000602281	0.00012622	64	25	1.34874e-05	0.000214978
g__Rheinheimera	computer screen	No	4.46143e-05	9.34889e-06	64	7	1.34646e-05	0.000214978
g__Opitutus	soil	Yes	0.00310166	0.000651787	64	16	1.41179e-05	0.000223518
g__Lampropedia	soil	Yes	0.000500563	0.000105438	64	22	1.46891e-05	0.00023101
o__Streptophyta	computer screen	No	0.0559483	0.0118339	64	49	1.57406e-05	0.000245908
f__Sinobacteraceae	soil	Yes	0.00802107	0.00170898	64	32	1.77554e-05	0.00027556
o__[Pedosphaerales]	soil	Yes	0.00345557	0.000736989	64	16	1.80507e-05	0.00027831
g__Solirubrobacter	soil	No	0.00342369	0.000732657	64	29	1.90775e-05	0.000292233
f__Isosphaeraceae	soil	Yes	0.00166225	0.000356802	64	24	2.00507e-05	0.000303203
f__UD5	soil	Yes	0.00188033	0.000403455	64	19	1.99231e-05	0.000303203
f__Phyllobacteriaceae	soil	No	0.00162105	0.000348509	64	34	2.05726e-05	0.000309113
f__Ellin5301	soil	Yes	0.00308549	0.000665908	64	24	2.18985e-05	0.000325847
f__mb2424	soil	No	0.0011085	0.00023928	64	16	2.19626e-05	0.000325847
g__Legionella	soil	Yes	0.000519325	0.000112253	64	17	2.24501e-05	0.000330999
o__Rickettsiales	soil	No	0.000546786	0.000118682	64	19	2.4007e-05	0.000351755
f__[Chthoniobacteraceae]	soil	No	0.00696835	0.00151452	64	27	2.45235e-05	0.000357105
f__Phyllobacteriaceae	soil	Yes	0.0016027	0.000348509	64	34	2.47201e-05	0.000357759
c__ML635J-21	soil	No	0.00224558	0.000489324	64	19	2.55584e-05	0.000367635
f__Gaiellaceae	soil	Yes	0.0113331	0.00247575	64	34	2.66e-05	0.000378009
g__Steroidobacter	soil	Yes	0.00163472	0.000357055	64	18	2.65365e-05	0.000378009
g__Nelumbo	computer screen	No	0.00197265	0.000432077	64	21	2.77452e-05	0.000391922
f__Isosphaeraceae	soil	No	0.00161496	0.000356802	64	24	3.17922e-05	0.000446415
f__Armatimonadaceae	soil	No	0.000554521	0.000122783	64	20	3.29029e-05	0.000456576
p__FBP	soil	No	0.00195272	0.000432272	64	20	3.27805e-05	0.000456576
g__Mycetocola	soil	Yes	0.000959375	0.00021404	64	32	3.7003e-05	0.000510468
g__Ellin506	soil	No	0.00668761	0.0014959	64	20	3.85128e-05	0.000528208
o__Gaiellales	soil	No	0.00135407	0.000303862	64	25	4.0472e-05	0.00055187
g__Turicibacter	computer screen	Yes	0.00243618	0.000547443	64	21	4.13269e-05	0.000560288
o__iii1-15	soil	No	0.0240432	0.00541849	64	30	4.31918e-05	0.000582225
o__Cytophagales	soil	No	0.000632385	0.000142897	64	16	4.49762e-05	0.000602834
g__Haemophilus	saliva	No	0.0688977	0.0156237	64	46	4.74471e-05	0.000632359
g__Segetibacter	soil	Yes	0.0194442	0.00441256	64	26	4.79811e-05	0.000635884
f__Pirellulaceae	soil	Yes	0.00408294	0.0009287	64	23	4.96781e-05	0.000654697
f__Ellin5301	soil	No	0.00292543	0.000665908	64	24	5.0234e-05	0.000658345
g__Granulicatella	saliva	Yes	0.0270296	0.00618795	64	55	5.47186e-05	0.000713156
g__Cellulomonas	soil	Yes	0.00116294	0.000267468	64	31	5.86033e-05	0.000759588
g__Sporosarcina	computer screen	Yes	0.00977624	0.00226189	64	35	6.39755e-05	0.000820269
g__Thermus	computer screen	Yes	0.000547708	0.000126722	64	30	6.39803e-05	0.000820269
g__Asticcacaulis	soil	Yes	0.00145309	0.000338906	64	18	7.19291e-05	0.000917193
f__Bradyrhizobiaceae	computer mouse	Yes	0.00940136	0.00219546	64	55	7.32572e-05	0.000929106
f__Bradyrhizobiaceae	soil	Yes	0.00939728	0.00219546	64	55	7.37188e-05	0.000929961
g__Shinella	soil	No	0.000429692	0.000100426	64	23	7.41217e-05	0.00093007
f__Gemmataceae	soil	No	0.00279775	0.000654447	64	23	7.50594e-05	0.000936853
g__Lampropedia	soil	No	0.000448672	0.000105438	64	22	8.0221e-05	0.000996007
f__AK1AB1_02E	soil	Yes	0.00020187	4.74738e-05	64	16	8.10521e-05	0.00100106
f__Bradyrhizobiaceae	soil	No	0.00930061	0.00219546	64	55	8.55252e-05	0.0010508
g__Candidatus Protochlamydia	soil	No	0.000276842	6.53977e-05	64	16	8.64158e-05	0.0010508
g__Peredibacter	soil	No	0.000608704	0.000143776	64	16	8.62773e-05	0.0010508
f__Gemellaceae	saliva	No	0.0152494	0.00362225	64	39	9.3451e-05	0.00113052
f__Hyphomicrobiaceae	soil	Yes	0.00610456	0.00145594	64	28	9.89549e-05	0.00119099
o__[Pedosphaerales]	soil	No	0.00307618	0.000736989	64	16	0.000105416	0.00126231
f__Hyphomicrobiaceae	soil	No	0.00605042	0.00145594	64	28	0.00011206	0.0013351
g__Rothia	saliva	No	0.0130869	0.00316779	64	45	0.000121581	0.00144125
o__Gemmatimonadales	soil	Yes	0.0025563	0.000619313	64	21	0.000123044	0.00145131
f__[Chthoniobacteraceae]	soil	Yes	0.00622911	0.00151452	64	27	0.000129217	0.00151653
g__Streptococcus	saliva	No	0.217995	0.053133	64	64	0.000133631	0.00156057
g__Burkholderia	soil	No	0.0118552	0.00289322	64	32	0.000135978	0.00156115
g__Finegoldia	saliva	No	-0.00588174	0.00143499	64	20	0.000135418	0.00156115
g__Finegoldia	saliva	Yes	-0.00587742	0.00143499	64	20	0.000136779	0.00156115
g__Finegoldia	soil	No	-0.00587675	0.00143499	64	20	0.00013699	0.00156115
g__Finegoldia	soil	Yes	-0.00588174	0.00143499	64	20	0.000135418	0.00156115
o__iii1-15	soil	Yes	0.0221419	0.00541849	64	30	0.000141126	0.00160055
g__Planctomyces	soil	Yes	0.00287339	0.000709648	64	19	0.000159665	0.00180215
g__Finegoldia	computer screen	Yes	-0.00580257	0.00143499	64	20	0.000162533	0.00182578
o__Rhodospirillales	soil	Yes	0.000431991	0.000107188	64	26	0.000169889	0.00189937
g__Kingella	saliva	Yes	0.000491763	0.000122709	64	23	0.00018302	0.00203653
g__Iamia	soil	No	0.000915674	0.000228807	64	18	0.000186427	0.0020647
g__Actinomycetospora	soil	Yes	0.000605352	0.000151556	64	26	0.000191203	0.0021077
c__C0119	soil	Yes	0.00154568	0.000388059	64	17	0.000198306	0.00217583
g__Flavisolibacter	soil	No	0.0133711	0.00335894	64	28	0.00019985	0.00218262
g__Actinomyces	saliva	No	0.031646	0.00795483	64	54	0.000201509	0.00219059
g__Prevotella	saliva	No	0.0452355	0.0113788	64	50	0.000203356	0.00219484
g__Spirosoma	soil	Yes	0.00121451	0.000305551	64	21	0.00020376	0.00219484
f__Erythrobacteraceae	soil	No	0.00197376	0.000499906	64	27	0.000222229	0.0023829
g__Phycicoccus	soil	Yes	0.000142232	3.6266e-05	64	25	0.000242154	0.0025848
g__Leuconostoc	soil	Yes	-0.00084241	0.00021539	64	24	0.000250814	0.00266518
g__Leuconostoc	soil	No	-0.000841468	0.00021539	64	24	0.0002544	0.00269117
g__Veillonella	saliva	No	0.0499488	0.0128218	64	52	0.000263712	0.00277721
o__Clostridiales	computer screen	Yes	0.0105797	0.00271902	64	54	0.000267716	0.00280685
g__Williamsia	soil	No	0.00178112	0.000458102	64	24	0.000270282	0.00282121
o__Sva0725	soil	No	0.00109704	0.000282361	64	19	0.000272733	0.00283426
g__Porphyromonas	saliva	Yes	0.00726859	0.00187209	64	34	0.000275073	0.00284605
g__Enhydrobacter	saliva	Yes	-0.00267163	0.000688602	64	23	0.0002776	0.00284721
g__Enhydrobacter	soil	Yes	-0.00267163	0.000688602	64	23	0.0002776	0.00284721
g__Leuconostoc	saliva	No	-0.000834947	0.00021539	64	24	0.000280618	0.00286571
g__Enhydrobacter	soil	No	-0.00266678	0.000688602	64	23	0.000283989	0.00288763
g__Enhydrobacter	saliva	No	-0.00266571	0.000688602	64	23	0.000285416	0.00288968
g__Treponema	saliva	No	0.00249736	0.000645517	64	19	0.000287653	0.00289989
g__Leuconostoc	saliva	Yes	-0.000827758	0.00021539	64	24	0.000312533	0.0031373
g__Burkholderia	soil	Yes	0.0110773	0.00289322	64	32	0.00032732	0.00327181
f__Erythrobacteraceae	soil	Yes	0.00190809	0.000499906	64	27	0.000339964	0.00338387
f__Enterobacteriaceae	computer mouse	Yes	0.278492	0.0730289	64	64	0.000343734	0.00339276
g__Enhydrobacter	computer mouse	Yes	-0.00262649	0.000688602	64	23	0.000342874	0.00339276
o__Sphingomonadales	soil	No	0.00241868	0.000635552	64	30	0.000352464	0.00346442
c__Gemm-1	soil	No	0.00111231	0.000292755	64	17	0.000359503	0.00351896
g__Kytococcus	computer screen	No	0.000165166	4.35899e-05	64	12	0.00037165	0.00362282
g__Ellin506	soil	Yes	0.00565065	0.0014959	64	20	0.000385768	0.00374497
f__Gemmataceae	soil	Yes	0.00246877	0.000654447	64	23	0.000392128	0.00379111
g__Flavisolibacter	soil	Yes	0.0126176	0.00335894	64	28	0.000412496	0.00397175
g__Eikenella	computer screen	Yes	-0.000259914	6.94717e-05	64	21	0.000432825	0.00411707
g__Eikenella	soil	Yes	-0.000259914	6.94717e-05	64	21	0.000432825	0.00411707
o__Spirobacillales	soil	Yes	0.00150637	0.000402631	64	16	0.000432798	0.00411707
f__Beijerinckiaceae	soil	Yes	0.00354442	0.000949085	64	28	0.000442177	0.0041229
g__Bacillus	computer screen	Yes	-0.0594072	0.0158967	64	64	0.000438669	0.0041229
g__Corynebacterium	soil	No	-0.101035	0.0270521	64	62	0.000441779	0.0041229
g__Corynebacterium	soil	Yes	-0.101041	0.0270521	64	62	0.000441512	0.0041229
g__Eikenella	computer mouse	Yes	-0.000259666	6.94717e-05	64	21	0.000437761	0.0041229
g__Faecalibacterium	computer screen	No	0.00357974	0.000960468	64	14	0.000452802	0.00420535
g__Erythrobacter	soil	Yes	0.000961369	0.000258367	64	19	0.000461711	0.00427128
g__Actinotalea	soil	Yes	0.000430924	0.000115997	64	23	0.000470565	0.00433619
o__OPB54	soil	No	0.00145618	0.000392817	64	33	0.000482516	0.00442901
g__Corynebacterium	saliva	Yes	-0.100014	0.0270521	64	62	0.000497938	0.00453527
g__Peptococcus	saliva	No	0.000553963	0.000149813	64	16	0.000496954	0.00453527
g__Adhaeribacter	soil	No	0.000434738	0.000118018	64	17	0.000519501	0.00471347
f__Piscirickettsiaceae	soil	No	0.00244161	0.000664729	64	16	0.000537084	0.00482208
g__Peptoniphilus	saliva	No	-0.00367206	0.000999805	64	22	0.000537604	0.00482208
g__Peptoniphilus	soil	No	-0.00367206	0.000999805	64	22	0.000537604	0.00482208
g__Eikenella	soil	No	-0.000255049	6.94717e-05	64	21	0.000540169	0.00482673
g__Peptoniphilus	soil	Yes	-0.00366854	0.000999805	64	22	0.000543597	0.00483904
f__Gaiellaceae	soil	No	0.00907275	0.00247575	64	34	0.000551549	0.00489137
g__Peptoniphilus	saliva	Yes	-0.00366166	0.000999805	64	22	0.000555493	0.0049079
g__Peptoniphilus	computer screen	Yes	-0.00364742	0.000999805	64	22	0.000580923	0.00509673
g__Segetibacter	soil	No	0.016097	0.00441256	64	26	0.000581187	0.00509673
g__Pseudonocardia	soil	Yes	0.00173901	0.000477263	64	36	0.00058901	0.0051462
f__Planococcaceae	computer screen	Yes	0.00334829	0.000920296	64	45	0.000599152	0.0052155
f__Intrasporangiaceae	computer screen	No	0.000583308	0.000160588	64	27	0.00061045	0.00529431
g__Corynebacterium	saliva	No	-0.097968	0.0270521	64	62	0.000631553	0.00545727
g__Veillonella	saliva	Yes	0.0463386	0.0128218	64	52	0.000646328	0.00555716
o__Rhodospirillales	soil	No	0.000387306	0.000107188	64	26	0.000647825	0.00555716
o__Rickettsiales	soil	Yes	0.00042804	0.000118682	64	19	0.00066156	0.00565442
f__Solibacteraceae	soil	Yes	0.00195327	0.000542246	64	26	0.000670733	0.00571213
f__Solibacteraceae	soil	No	0.00195116	0.000542246	64	26	0.000678936	0.00576118
g__Oribacterium	saliva	No	0.00202878	0.000564173	64	23	0.000683728	0.00578105
f__0319-6G20	soil	No	0.00070372	0.000196069	64	32	0.000698558	0.00586441
f__Piscirickettsiaceae	soil	Yes	0.0023862	0.000664729	64	16	0.000697265	0.00586441
g__Atopobium	saliva	Yes	0.00451495	0.00125969	64	28	0.000709445	0.00587769
g__Propionivibrio	computer screen	Yes	-0.000190219	5.30763e-05	64	29	0.000710106	0.00587769
g__Propionivibrio	saliva	No	-0.000190219	5.30763e-05	64	29	0.000710106	0.00587769
g__Propionivibrio	saliva	Yes	-0.000190219	5.30763e-05	64	29	0.000710106	0.00587769
f__Micromonosporaceae	computer screen	No	0.000400764	0.000112233	64	32	0.000739494	0.00609953
g__Enhydrobacter	computer screen	Yes	-0.00245011	0.000688602	64	23	0.000769271	0.00632304
g__Propionivibrio	computer mouse	Yes	-0.000188159	5.30763e-05	64	29	0.00080096	0.00656064
g__Lautropia	saliva	No	0.00718657	0.00203366	64	35	0.000829292	0.00674586
o__Sphingomonadales	soil	Yes	0.00224629	0.000635552	64	30	0.000827818	0.00674586
g__Pseudonocardia	computer screen	Yes	0.00168401	0.000477263	64	36	0.000843061	0.0068343
f__Frankiaceae	soil	Yes	0.00344006	0.000975416	64	22	0.000847534	0.00684703
g__Mycetocola	soil	No	0.000753657	0.00021404	64	32	0.000862426	0.00694356
g__Dermabacter	computer screen	No	0.000893084	0.000253785	64	11	0.000867876	0.00696367
o__N1423WL	soil	Yes	0.00280872	0.000799131	64	13	0.000879582	0.00703367
g__Eikenella	computer screen	No	-0.00024389	6.94717e-05	64	21	0.000890701	0.00709853
f__Armatimonadaceae	soil	Yes	0.000430845	0.000122783	64	20	0.000895217	0.00711049
c__C0119	soil	No	0.00135992	0.000388059	64	17	0.000907873	0.00718682
g__Adhaeribacter	soil	Yes	0.000413412	0.000118018	64	17	0.000912009	0.00719541
f__Nakamurellaceae	soil	No	0.00269808	0.000772161	64	29	0.000936864	0.0073449
g__Lactococcus	soil	Yes	-0.00364946	0.00104447	64	33	0.000937183	0.0073449
g__Lactococcus	soil	No	-0.00363584	0.00104447	64	33	0.000975417	0.00761923
g__Arthrobacter	soil	No	0.000439004	0.00012622	64	25	0.000984319	0.00765748
g__Lactococcus	saliva	Yes	-0.00363188	0.00104447	64	33	0.000986806	0.00765748
g__Psychrobacter	computer screen	No	0.000285108	8.20706e-05	64	11	0.000996904	0.00771048
g__Hymenobacter	soil	Yes	0.00299789	0.000863383	64	45	0.00100201	0.00772464
f__Rhizobiaceae	soil	No	0.000791558	0.000228536	64	34	0.00102888	0.00790596
f__Nakamurellaceae	soil	Yes	0.0026702	0.000772161	64	29	0.00104636	0.00799838
g__Lactococcus	saliva	No	-0.00361143	0.00104447	64	33	0.00104769	0.00799838
g__Finegoldia	computer mouse	Yes	-0.0049582	0.00143499	64	20	0.00105558	0.00803263
g__Prevotella	saliva	Yes	0.0391824	0.0113788	64	50	0.00109409	0.00829888
g__Facklamia	computer screen	No	0.00224023	0.000652194	64	13	0.00112297	0.00849065
g__Planifilum	computer screen	Yes	0.00251781	0.000733585	64	35	0.00113228	0.00853368
g__Geodermatophilus	soil	No	0.00188307	0.000549885	64	28	0.0011591	0.00870798
g__Leuconostoc	computer screen	Yes	-0.000734123	0.00021539	64	24	0.00121731	0.00911627
g__Ruminococcus	computer screen	No	0.0017996	0.000528401	64	23	0.00122692	0.00915922
p__WPS-2	soil	Yes	0.000815464	0.000239925	64	20	0.00125287	0.0093234
g__Streptomyces	computer screen	Yes	0.00129287	0.000381002	64	34	0.00127382	0.00944948
o__Sva0725	soil	Yes	0.000957203	0.000282361	64	19	0.00128675	0.00951546
g__Geodermatophilus	soil	Yes	0.00185926	0.000549885	64	28	0.00132145	0.00974154
g__Cellvibrio	soil	No	0.00122002	0.000361515	64	17	0.00134732	0.00990131
g__Dialister	saliva	No	0.000964134	0.000286596	64	26	0.00139129	0.0101927
g__Pilimelia	computer screen	Yes	0.00136086	0.00040502	64	30	0.00140855	0.0102872
f__Rhizobiaceae	soil	Yes	0.000767256	0.000228536	64	34	0.00142013	0.0103398
f__Koribacteraceae	soil	No	0.00279685	0.000836582	64	21	0.00148144	0.01072
g__Megasphaera	saliva	No	0.00144844	0.000433153	64	22	0.00147806	0.01072
g__Bradyrhizobium	computer screen	Yes	0.00425345	0.00127283	64	49	0.00148794	0.0107341
g__Nesterenkonia	computer screen	No	0.000721825	0.000216685	64	14	0.00153554	0.0110437
c__OPB56	soil	Yes	0.000548456	0.000164728	64	16	0.00154358	0.0110627
g__Iamia	soil	Yes	0.000761609	0.000228807	64	18	0.00154756	0.0110627
g__Luteolibacter	soil	No	0.000575817	0.000173481	64	12	0.00159173	0.011328
o__Lactobacillales	computer screen	No	0.000115702	3.4864e-05	64	12	0.00159428	0.011328
f__Rhodobacteraceae	computer screen	No	0.00264554	0.000797947	64	31	0.00160969	0.0113351
g__Bradyrhizobium	soil	No	0.00422197	0.00127283	64	49	0.00160219	0.0113351
g__Erythrobacter	soil	No	0.000856679	0.000258367	64	19	0.00160823	0.0113351
g__Bradyrhizobium	soil	Yes	0.00421643	0.00127283	64	49	0.00162314	0.0113958
g__Lactococcus	computer mouse	Yes	-0.00344436	0.00104447	64	33	0.00169697	0.0118554
o__N1423WL	soil	No	0.00263504	0.000799131	64	13	0.00169866	0.0118554
g__Bulleidia	saliva	Yes	0.000765334	0.000232471	64	18	0.00172526	0.0120056
g__Megasphaera	saliva	Yes	0.00142312	0.000433153	64	22	0.00175981	0.0122099
f__Beijerinckiaceae	soil	No	0.00311313	0.000949085	64	28	0.00178802	0.0123331
g__Actinotalea	soil	No	0.000380555	0.000115997	64	23	0.00178492	0.0123331
g__Haemophilus	saliva	Yes	0.051177	0.0156237	64	46	0.00181218	0.0124329
g__Wautersiella	computer screen	No	3.4974e-05	1.06776e-05	64	11	0.00181302	0.0124329
f__Streptomycetaceae	soil	No	0.000646577	0.000197798	64	21	0.00184871	0.0126043
g__Exiguobacterium	computer screen	No	0.000634516	0.000194063	64	24	0.00184455	0.0126043
f__Syntrophobacteraceae	soil	Yes	0.00747488	0.00229027	64	20	0.00187697	0.0127235
g__Pseudonocardia	soil	No	0.00155794	0.000477263	64	36	0.00187381	0.0127235
f__Gemellaceae	saliva	Yes	0.0118001	0.00362225	64	39	0.00191105	0.0129174
g__Skermanella	computer screen	No	0.000702836	0.000215988	64	25	0.0019316	0.013019
g__Bulleidia	saliva	No	0.000754848	0.000232471	64	18	0.00197191	0.0132528
f__Pseudonocardiaceae	soil	No	0.000834033	0.000257298	64	25	0.00200447	0.0134092
g__Microbispora	computer screen	Yes	0.00114295	0.000352637	64	29	0.00200655	0.0134092
o__OPB54	soil	Yes	0.00126883	0.000392817	64	33	0.00207305	0.0138145
g__Peredibacter	soil	Yes	0.000464219	0.000143776	64	16	0.00208113	0.0138293
f__Clostridiaceae	computer screen	Yes	0.00637554	0.00197691	64	52	0.00210425	0.0139436
g__Gardnerella	computer screen	No	0.000199529	6.19959e-05	64	9	0.00214532	0.0141759
f__[Mogibacteriaceae]	saliva	Yes	0.00124187	0.000387166	64	22	0.00221456	0.0145926
g__Balneimonas	soil	Yes	0.0012882	0.00040182	64	27	0.00222549	0.0146238
g__Frigoribacterium	soil	No	0.000179361	5.62061e-05	64	18	0.00232391	0.0152281
c__ML635J-21	soil	Yes	0.00155047	0.000489324	64	19	0.0024819	0.0162183
f__Streptomycetaceae	soil	Yes	0.000625061	0.000197798	64	21	0.00254391	0.0165319
f__Syntrophobacteraceae	soil	No	0.00723915	0.00229027	64	20	0.00253856	0.0165319
g__Cellvibrio	soil	Yes	0.00114097	0.000361515	64	17	0.00257379	0.0166345
g__Lactococcus	computer screen	Yes	-0.00329671	0.00104447	64	33	0.00257177	0.0166345
g__Pedomicrobium	soil	Yes	0.00282628	0.000897429	64	21	0.00262495	0.0169187
g__Parvimonas	saliva	No	0.00122187	0.000388225	64	22	0.00263998	0.0169693
f__Alicyclobacillaceae	soil	Yes	0.00257955	0.000821613	64	29	0.00269973	0.0173061
f__Frankiaceae	soil	No	0.00305817	0.000975416	64	22	0.00273406	0.0174787
g__Weissella	computer screen	No	0.000360245	0.000115803	64	21	0.00293382	0.0187051
c__PRR-11	soil	Yes	0.0001327	4.27839e-05	64	11	0.00301259	0.0191555
g__Flavobacterium	soil	Yes	0.0103846	0.00334946	64	29	0.00302338	0.0191724
g__Paenibacillus	computer screen	Yes	0.00484979	0.00156528	64	45	0.00304119	0.0192337
g__Pullulanibacillus	computer screen	Yes	0.0043534	0.0014057	64	35	0.00305323	0.0192582
f__mb2424	soil	Yes	0.000740497	0.00023928	64	16	0.00307324	0.0193327
f__0319-6G20	soil	Yes	0.000605858	0.000196069	64	32	0.00311475	0.0195417
g__Cellulomonas	soil	No	0.000823705	0.000267468	64	31	0.0032089	0.0200369
g__Leuconostoc	computer screen	No	-0.000663283	0.00021539	64	24	0.00321067	0.0200369
c__OPB56	soil	No	0.000505021	0.000164728	64	16	0.00333859	0.0207803
f__Aeromonadaceae	soil	No	-0.000707536	0.000232834	64	42	0.00360559	0.0223831
g__Eikenella	saliva	Yes	-0.000209959	6.94717e-05	64	21	0.00377927	0.0233997
g__Peptoniphilus	computer mouse	Yes	-0.00301799	0.000999805	64	22	0.00381854	0.023581
g__Rhodococcus	computer mouse	Yes	-0.00119776	0.000399245	64	41	0.00402379	0.0247836
f__Aeromonadaceae	saliva	No	-0.000698133	0.000232834	64	42	0.00404251	0.0248341
f__Aeromonadaceae	saliva	Yes	-0.000696808	0.000232834	64	42	0.00410794	0.0251705
g__Finegoldia	computer screen	No	-0.00428765	0.00143499	64	20	0.00416376	0.0254464
g__Hymenobacter	soil	No	0.00257262	0.000863383	64	45	0.0042614	0.0259758
f__Thermoactinomycetaceae	computer screen	Yes	0.00474404	0.00159384	64	35	0.00430001	0.0261262
g__Phytohabitans	soil	No	0.000479366	0.000161088	64	23	0.00430823	0.0261262
g__Rhodococcus	computer screen	Yes	-0.00118697	0.000399245	64	41	0.00434175	0.026262
f__Aeromonadaceae	soil	Yes	-0.000691041	0.000232834	64	42	0.00440422	0.0265039
g__Lapillicoccus	soil	Yes	0.00228856	0.000771004	64	35	0.00440022	0.0265039
g__Gordonia	saliva	Yes	-0.00153758	0.000519533	64	27	0.00450942	0.027068
g__Rhodococcus	saliva	Yes	-0.00118053	0.000399245	64	41	0.00454271	0.0271986
g__Gordonia	saliva	No	-0.00153387	0.000519533	64	27	0.00460039	0.0274742
g__Tepidimonas	computer screen	Yes	0.00076635	0.000260517	64	21	0.00474061	0.0282401
c__PRR-11	soil	No	0.000125727	4.27839e-05	64	11	0.00478045	0.0284057
g__Kineococcus	computer screen	No	0.000199522	6.80929e-05	64	12	0.00489512	0.0290141
g__Candidatus Nitrososphaera	soil	Yes	0.00509251	0.00174265	64	26	0.00500327	0.0295068
g__Rhodococcus	saliva	No	-0.00116688	0.000399245	64	41	0.00499729	0.0295068
g__Lapillicoccus	computer screen	No	0.00224744	0.000771004	64	35	0.00510628	0.0300392
c__Clostridia	computer screen	Yes	0.000803694	0.000276782	64	23	0.00526793	0.0308503
f__Pseudonocardiaceae	soil	Yes	0.000747077	0.000257298	64	25	0.00527031	0.0308503
f__Ruminococcaceae	computer screen	Yes	0.00153128	0.00052776	64	34	0.0053008	0.030952
g__Bacillus	computer mouse	Yes	-0.0459431	0.0158967	64	64	0.00547	0.0318611
o__RB41	soil	Yes	0.00412738	0.00143204	64	21	0.00559103	0.0324858
f__Paenibacillaceae	soil	Yes	0.00162751	0.00056589	64	26	0.00568667	0.0329603
g__Pedomicrobium	soil	No	0.00257559	0.000897429	64	21	0.00578207	0.0334311
g__Gordonia	soil	Yes	-0.00149038	0.000519533	64	27	0.00580261	0.0334679
f__Coriobacteriaceae	computer screen	Yes	0.00239975	0.000838252	64	19	0.00589711	0.03393
f__Caldilineaceae	soil	No	0.00111964	0.000392551	64	16	0.00607095	0.0348452
o__Bacillales	computer screen	Yes	0.00637977	0.00223755	64	52	0.00608738	0.0348547
g__Gordonia	computer screen	Yes	-0.00148028	0.000519533	64	27	0.00612034	0.0349585
o__Gemmatimonadales	soil	No	0.00175903	0.000619313	64	21	0.00627225	0.0357397
f__Bacillaceae	computer screen	Yes	0.00832492	0.00293781	64	58	0.006386	0.0363002
f__Acidobacteriaceae	soil	Yes	0.00984454	0.00347714	64	28	0.00642972	0.0364608
g__Candidatus Nitrososphaera	soil	No	0.00492735	0.00174265	64	26	0.00649516	0.0367436
g__Streptomyces	soil	Yes	0.0010761	0.000381002	64	34	0.0065507	0.0369691
g__Gordonia	soil	No	-0.00146365	0.000519533	64	27	0.00667928	0.0376048
g__Lysobacter	soil	Yes	0.000249118	8.85497e-05	64	26	0.00675113	0.0379188
c__Gemmatimonadetes	soil	Yes	0.00114631	0.000409703	64	20	0.00703937	0.0394083
f__Bacteriovoracaceae	soil	No	0.000332117	0.000118725	64	13	0.00704973	0.0394083
g__Leptotrichia	saliva	No	0.0125841	0.00450941	64	41	0.0071796	0.0400394
g__Lapillicoccus	soil	No	0.00214029	0.000771004	64	35	0.00746945	0.0415576
f__Koribacteraceae	soil	Yes	0.00231925	0.000836582	64	21	0.00754392	0.0418634
g__Shinella	soil	Yes	0.00027833	0.000100426	64	23	0.00755991	0.0418634
f__Enterobacteriaceae	computer screen	Yes	0.202271	0.0730289	64	64	0.00759606	0.0419651
f__Methylocystaceae	soil	No	0.00640834	0.00231563	64	36	0.00764345	0.0421283
g__Brevibacterium	computer screen	No	0.00172317	0.000624543	64	16	0.00781665	0.0429824
f__Oxalobacteraceae	saliva	Yes	-0.135772	0.0493444	64	62	0.00797748	0.0436633
g__Kaistobacter	computer screen	No	0.000615767	0.000223723	64	31	0.00795946	0.0436633
g__Spirosoma	soil	No	0.000837424	0.000305551	64	21	0.00821204	0.044843
f__Oxalobacteraceae	saliva	No	-0.135144	0.0493444	64	62	0.00825425	0.0449695
g__Erythromicrobium	soil	Yes	0.000431207	0.000157729	64	13	0.00836396	0.0453763
g__Jeotgalicoccus	computer screen	No	0.000229015	8.3775e-05	64	13	0.0083674	0.0453763
f__Xanthomonadaceae	saliva	No	-0.00383766	0.00140833	64	47	0.00856435	0.0462318
f__Xanthomonadaceae	saliva	Yes	-0.00383841	0.00140833	64	47	0.00855226	0.0462318
f__Sporolactobacillaceae	soil	Yes	0.00185979	0.000682925	64	25	0.00860363	0.0462322
g__Catonella	saliva	Yes	0.000430308	0.000157993	64	24	0.00859628	0.0462322
f__Pseudomonadaceae	soil	Yes	-0.00241218	0.000888591	64	49	0.00880437	0.0472034
f__Pseudomonadaceae	soil	No	-0.00240951	0.000888591	64	49	0.00887494	0.0474739
f__Porphyromonadaceae	computer screen	Yes	0.0407759	0.015083	64	36	0.00907003	0.0484077
f__Pseudomonadaceae	saliva	No	-0.00239457	0.000888591	64	49	0.00928008	0.0493466
g__Granulicatella	saliva	No	0.0166733	0.00618795	64	55	0.00928779	0.0493466
f__Aeromonadaceae	computer screen	Yes	-0.000623983	0.000232834	64	42	0.00965185	0.0510509
g__Clostridium	saliva	Yes	-0.114013	0.0425423	64	64	0.00965051	0.0510509
g__Gordonia	computer screen	No	-0.00139044	0.000519533	64	27	0.00974442	0.0514253
f__Lachnospiraceae	saliva	No	0.00243125	0.000909801	64	52	0.00984886	0.0518604
f__Oxalobacteraceae	computer screen	Yes	-0.131787	0.0493444	64	62	0.00988888	0.0519552
g__Atopobium	saliva	No	0.00335508	0.00125969	64	28	0.0100819	0.0528515
f__Xanthomonadaceae	computer mouse	Yes	-0.00374639	0.00140833	64	47	0.0101682	0.053186
g__Clostridium	soil	Yes	-0.112809	0.0425423	64	64	0.0103976	0.0542653
g__Gordonia	computer mouse	Yes	-0.00137581	0.000519533	64	27	0.0104941	0.0546483
g__Clostridium	soil	No	-0.112485	0.0425423	64	64	0.0106074	0.0551163
f__Pseudomonadaceae	saliva	Yes	-0.00234104	0.000888591	64	49	0.0108747	0.0563813
c__S085	soil	No	0.00160798	0.00061105	64	18	0.0109618	0.0566297
g__Phycicoccus	computer screen	No	9.54229e-05	3.6266e-05	64	25	0.0109707	0.0566297
o__Burkholderiales	soil	Yes	0.00138329	0.0005269	64	20	0.0111398	0.0573771
g__Phytohabitans	soil	Yes	0.000422257	0.000161088	64	23	0.0112579	0.0578592
g__Balneimonas	soil	No	0.00104866	0.00040182	64	27	0.0116001	0.0594881
f__Aeromonadaceae	computer mouse	Yes	-0.000606995	0.000232834	64	42	0.0116848	0.0596632
g__Rothia	saliva	Yes	0.0082596	0.00316779	64	45	0.0116731	0.0596632
g__Fusobacterium	computer mouse	Yes	0.00870021	0.00335003	64	55	0.0119897	0.0610877
f__Acidobacteriaceae	soil	No	0.00900024	0.00347714	64	28	0.0122613	0.062337
f__Bacteriovoracaceae	soil	Yes	0.000306192	0.000118725	64	13	0.0125628	0.0637324
f__Oxalobacteraceae	soil	Yes	-0.12713	0.0493444	64	62	0.0126478	0.0640261
g__Clostridium	saliva	No	-0.109484	0.0425423	64	64	0.0127411	0.0643604
f__Verrucomicrobiaceae	soil	No	0.00159008	0.000618461	64	12	0.012824	0.0646408
f__Oxalobacteraceae	soil	No	-0.126824	0.0493444	64	62	0.0128519	0.0646434
g__Aeromicrobium	soil	No	0.000411613	0.000160437	64	25	0.0130049	0.0652737
g__Erwinia	soil	No	-0.00237932	0.000928923	64	46	0.0131463	0.0658432
f__Oxalobacteraceae	computer mouse	Yes	-0.126223	0.0493444	64	62	0.0132607	0.0662752
g__Frigoribacterium	soil	Yes	0.000143563	5.62061e-05	64	18	0.0133897	0.0667785
g__Bacteroides	computer screen	No	0.00205261	0.000804953	64	17	0.0135368	0.0668202
g__Cohnella	computer screen	Yes	0.000804003	0.000314945	64	27	0.0134377	0.0668202
g__Erwinia	soil	Yes	-0.00236981	0.000928923	64	46	0.0134964	0.0668202
g__Propionibacterium	saliva	Yes	-0.000819993	0.000321683	64	21	0.013568	0.0668202
g__Propionibacterium	soil	No	-0.000819993	0.000321683	64	21	0.013568	0.0668202
g__Propionibacterium	soil	Yes	-0.000819993	0.000321683	64	21	0.013568	0.0668202
c__Gitt-GS-136	soil	Yes	0.000115356	4.53274e-05	64	14	0.013712	0.0672827
f__Alicyclobacillaceae	soil	No	0.0020908	0.000821613	64	29	0.0137189	0.0672827
f__Paenibacillaceae	soil	No	0.00143849	0.00056589	64	26	0.0138162	0.0675969
f__Peptostreptococcaceae	computer screen	Yes	0.00163084	0.000641731	64	40	0.0138403	0.0675969
g__Oribacterium	saliva	Yes	0.00143144	0.000564173	64	23	0.013985	0.068089
g__Propionibacterium	saliva	No	-0.000816063	0.000321683	64	21	0.0139988	0.068089
g__Fusobacterium	saliva	No	0.00848878	0.00335003	64	55	0.0141034	0.0684566
f__Hyphomonadaceae	soil	Yes	0.00166412	0.00065759	64	16	0.0142229	0.0688661
g__Erwinia	saliva	No	-0.00235017	0.000928923	64	46	0.0142461	0.0688661
g__Corynebacterium	computer mouse	Yes	-0.0683585	0.0270521	64	62	0.0143584	0.069267
g__Luteolibacter	soil	Yes	0.00043735	0.000173481	64	12	0.0145757	0.0701717
f__[Mogibacteriaceae]	saliva	No	0.000975664	0.000387166	64	22	0.0146132	0.070209
f__Microbacteriaceae	soil	No	0.00479615	0.00190383	64	39	0.014643	0.0702092
f__Sporichthyaceae	computer screen	No	0.000617295	0.000245203	64	27	0.0147076	0.0703757
f__Methylocystaceae	soil	Yes	0.00578713	0.00231563	64	36	0.0154078	0.0735768
f__Erysipelotrichaceae	computer mouse	Yes	-0.000262962	0.000105624	64	13	0.0157852	0.0745175
f__Erysipelotrichaceae	computer screen	Yes	-0.000262962	0.000105624	64	13	0.0157852	0.0745175
f__Erysipelotrichaceae	saliva	No	-0.000262962	0.000105624	64	13	0.0157852	0.0745175
f__Erysipelotrichaceae	saliva	Yes	-0.000262962	0.000105624	64	13	0.0157852	0.0745175
g__Dokdonella	soil	Yes	0.000204091	8.19852e-05	64	16	0.0157943	0.0745175
o__Chlorophyta	soil	Yes	0.000761863	0.000305725	64	23	0.0156898	0.0745175
g__Propionivibrio	computer screen	No	-0.000131584	5.30763e-05	64	29	0.016207	0.0763121
g__Actinoplanes	soil	No	0.000263554	0.000106394	64	18	0.016288	0.0765406
g__Methylobacterium	soil	No	0.00991295	0.00403264	64	51	0.0170836	0.0801195
g__Williamsia	soil	Yes	0.00112224	0.000458102	64	24	0.0174474	0.0816635
f__Caldilineaceae	soil	Yes	0.000956883	0.000392551	64	16	0.0179856	0.0840159
g__Arthrobacter	computer screen	No	0.000306994	0.00012622	64	25	0.0182287	0.0848155
g__Chryseobacterium	computer screen	No	0.000361692	0.000148669	64	41	0.0181993	0.0848155
c__S085	soil	Yes	0.00148444	0.00061105	64	18	0.0183601	0.0852589
g__Modestobacter	computer screen	No	0.0066191	0.00273553	64	32	0.0188061	0.0871582
g__Cohnella	soil	Yes	0.000761005	0.000314945	64	27	0.0189637	0.0877163
f__Ruminococcaceae	computer screen	No	0.00127282	0.00052776	64	34	0.0191793	0.0885402
f__Erysipelotrichaceae	soil	Yes	-0.0002544	0.000105624	64	13	0.0193325	0.0888067
g__Clostridium	computer mouse	Yes	-0.102453	0.0425423	64	64	0.0193458	0.0888067
g__Methylobacterium	computer screen	Yes	0.00971129	0.00403264	64	51	0.01935	0.0888067
g__Streptomyces	soil	No	0.00091315	0.000381002	64	34	0.0199062	0.091182
g__Pilimelia	soil	Yes	0.000968568	0.00040502	64	30	0.020168	0.0922023
c__Gemmatimonadetes	soil	No	0.000977045	0.000409703	64	20	0.0205008	0.0934228
g__Cloacibacterium	computer screen	Yes	0.00782655	0.00328226	64	24	0.0205142	0.0934228
g__Methylobacterium	soil	Yes	0.0095695	0.00403264	64	51	0.0211014	0.0959118
f__Erysipelotrichaceae	soil	No	-0.000250303	0.000105624	64	13	0.021271	0.0964968
f__Comamonadaceae	saliva	No	-0.0260685	0.0110332	64	62	0.0216395	0.0977923
g__Blautia	computer screen	No	0.00104207	0.000440911	64	19	0.021601	0.0977923
f__Comamonadaceae	saliva	Yes	-0.0260485	0.0110332	64	62	0.0217358	0.0980399
f__[Weeksellaceae]	saliva	Yes	0.106665	0.0452018	64	56	0.0217983	0.0981341
g__Flavobacterium	soil	No	0.00789371	0.00334946	64	29	0.0219604	0.0986752
f__Microbacteriaceae	soil	Yes	0.00448501	0.00190383	64	39	0.02201	0.0987103
g__Erwinia	saliva	Yes	-0.00218602	0.000928923	64	46	0.0221446	0.0991257
g__Capnocytophaga	computer screen	Yes	-0.000533197	0.000227921	64	28	0.0229073	0.1017
g__Capnocytophaga	soil	No	-0.000533197	0.000227921	64	28	0.0229073	0.1017
g__Capnocytophaga	soil	Yes	-0.000533197	0.000227921	64	28	0.0229073	0.1017
g__Halomonas	computer screen	Yes	0.000122159	5.22294e-05	64	7	0.0229353	0.1017
g__Sediminibacterium	soil	No	0.00145801	0.000622857	64	42	0.022827	0.1017
g__Rhodobacter	soil	No	6.6409e-05	2.8433e-05	64	13	0.0231174	0.102315
g__Aggregatibacter	saliva	Yes	0.000372462	0.000159576	64	23	0.0232053	0.102499
g__Brachybacterium	computer screen	No	0.00168177	0.00072099	64	34	0.0232894	0.102499
g__Capnocytophaga	computer mouse	Yes	-0.000531816	0.000227921	64	28	0.023247	0.102499
f__Verrucomicrobiaceae	soil	Yes	0.00143667	0.000618461	64	12	0.0238379	0.104523
g__Mycoplasma	saliva	Yes	0.00041111	0.000176949	64	15	0.0238181	0.104523
g__Kaistia	soil	No	0.000692785	0.00029833	64	19	0.0238823	0.104524
o__OPB54	computer screen	Yes	0.000907676	0.000392817	64	33	0.0245573	0.107279
g__Dyadobacter	soil	No	0.000608064	0.000264371	64	20	0.0251951	0.109659
g__Lactobacillus	computer screen	No	0.00654979	0.00284727	64	40	0.0251752	0.109659
g__Clostridium	computer screen	Yes	-0.0971706	0.0425423	64	64	0.0261788	0.113731
f__Hyphomonadaceae	soil	No	0.00149652	0.00065759	64	16	0.0267057	0.115807
g__Sediminibacterium	soil	Yes	0.00141356	0.000622857	64	42	0.0271096	0.117342
f__Pseudomonadaceae	computer mouse	Yes	-0.00201192	0.000888591	64	49	0.0274556	0.118622
o__DS-18	soil	Yes	0.000441808	0.000195212	64	15	0.0275178	0.118674
g__Acinetobacter	soil	Yes	-0.00303199	0.00134236	64	54	0.0278153	0.119738
g__[Prevotella]	saliva	No	0.00842492	0.00374609	64	39	0.028465	0.121949
g__Kingella	saliva	No	0.000275936	0.000122709	64	23	0.0284841	0.121949
g__Mycoplasma	saliva	No	0.000398052	0.000176949	64	15	0.0284285	0.121949
f__Methylobacteriaceae	computer screen	Yes	0.00598616	0.00266698	64	41	0.0287664	0.122935
g__Porphyromonas	saliva	No	0.00419239	0.00187209	64	34	0.0291183	0.124214
g__Acinetobacter	soil	No	-0.00299739	0.00134236	64	54	0.0295682	0.125905
g__Cohnella	soil	No	0.000702413	0.000314945	64	27	0.0297545	0.12647
g__Leuconostoc	computer mouse	Yes	-0.000479324	0.00021539	64	24	0.0301005	0.127711
f__Neisseriaceae	saliva	No	0.0200665	0.00906016	64	53	0.0308591	0.130532
g__Lysobacter	soil	No	0.000196099	8.85497e-05	64	26	0.0308763	0.130532
g__Aerococcus	computer mouse	Yes	0.000801584	0.000362438	64	34	0.0310889	0.131196
f__Alcaligenaceae	computer screen	Yes	-0.000123069	5.57825e-05	64	18	0.0314873	0.131934
f__Alcaligenaceae	saliva	No	-0.000123069	5.57825e-05	64	18	0.0314873	0.131934
f__Alcaligenaceae	saliva	Yes	-0.000123069	5.57825e-05	64	18	0.0314873	0.131934
o__Burkholderiales	soil	No	0.00116282	0.0005269	64	20	0.0314365	0.131934
f__Alcaligenaceae	computer mouse	Yes	-0.000122998	5.57825e-05	64	18	0.0315812	0.132092
g__Zea	computer screen	No	0.000763526	0.000347061	64	12	0.0319514	0.133404
g__Actinoplanes	soil	Yes	0.000233725	0.000106394	64	18	0.0321902	0.134164
f__Sporolactobacillaceae	soil	No	0.00149723	0.000682925	64	25	0.0325241	0.135316
g__Alicyclobacillus	computer screen	Yes	0.00314748	0.00143895	64	34	0.0329094	0.136678
f__Pseudomonadaceae	computer screen	No	-0.00194287	0.000888591	64	49	0.0329768	0.136718
f__Dietziaceae	computer screen	Yes	0.00061259	0.000280368	64	10	0.0330932	0.13696
g__Kaistia	soil	Yes	0.000649695	0.00029833	64	19	0.0336513	0.138782
g__Nitrospira	soil	Yes	0.00205011	0.000941365	64	20	0.0336485	0.138782
o__RB41	soil	No	0.00308462	0.00143204	64	21	0.0355577	0.146389
g__Luteimonas	soil	Yes	0.000384913	0.000179466	64	19	0.0363243	0.149284
f__Caulobacteraceae	saliva	No	-0.00892031	0.00418871	64	49	0.0376135	0.154313
f__Caulobacteraceae	saliva	Yes	-0.00891634	0.00418871	64	49	0.0376952	0.15438
g__Actinoplanes	computer screen	Yes	0.000225937	0.000106394	64	18	0.0381356	0.155643
g__Nitrospira	soil	No	0.00199951	0.000941365	64	20	0.0380949	0.155643
g__Acinetobacter	saliva	No	-0.00284769	0.00134236	64	54	0.0383269	0.156154
f__Xanthomonadaceae	computer screen	No	-0.00298051	0.00140833	64	47	0.0387732	0.1577
g__Prauserella	computer screen	Yes	0.000729669	0.000347025	64	23	0.0400048	0.162429
g__Dialister	saliva	Yes	0.000601561	0.000286596	64	26	0.040339	0.163433
g__Enterococcus	computer screen	Yes	0.00124605	0.000593804	64	20	0.0403906	0.163433
g__Kocuria	soil	Yes	-0.00198306	0.000946211	64	35	0.040633	0.164132
g__Pseudonocardia	computer screen	No	0.00099859	0.000477263	64	36	0.0409543	0.165147
g__Agrobacterium	saliva	No	-0.000203153	9.72508e-05	64	30	0.0412684	0.165847
g__Agrobacterium	saliva	Yes	-0.000203153	9.72508e-05	64	30	0.0412684	0.165847
f__Geodermatophilaceae	soil	No	0.000348472	0.000166944	64	22	0.0414184	0.166167
f__Sporichthyaceae	computer screen	Yes	0.000511415	0.000245203	64	27	0.0415764	0.166517
g__Kocuria	soil	No	-0.00197191	0.000946211	64	35	0.0417345	0.16681
o__Chlorophyta	soil	No	0.00063695	0.000305725	64	23	0.0417908	0.16681
g__Kocuria	saliva	No	-0.00196711	0.000946211	64	35	0.0422156	0.168221
c__Gitt-GS-136	soil	No	9.39752e-05	4.53274e-05	64	14	0.0427614	0.170108
g__Actinomycetospora	computer screen	No	0.000313915	0.000151556	64	26	0.0429524	0.17058
g__Agrobacterium	computer mouse	Yes	-0.000201239	9.72508e-05	64	30	0.0431461	0.171061
g__Dialister	computer screen	No	0.00059225	0.000286596	64	26	0.0434173	0.171848
g__Kocuria	saliva	Yes	-0.00195434	0.000946211	64	35	0.0435218	0.171973
g__WAL_1855D	computer screen	No	4.21011e-05	2.04277e-05	64	5	0.0439598	0.173413
g__Modestobacter	computer screen	Yes	0.00558374	0.00273553	64	32	0.0459553	0.180983
g__Amaricoccus	computer screen	Yes	0.00493299	0.00242587	64	17	0.046752	0.183813
g__Tetragenococcus	computer screen	Yes	0.00132547	0.00065254	64	32	0.0469872	0.184431
g__Peptoniphilus	computer screen	No	-0.00202717	0.000999805	64	22	0.0473733	0.185637
g__Dyadobacter	soil	Yes	0.000535497	0.000264371	64	20	0.047586	0.186162
g__Alloiococcus	computer screen	No	0.000188138	9.31632e-05	64	12	0.0482363	0.188393
f__Kineosporiaceae	computer screen	Yes	0.000488375	0.000243156	64	23	0.0494233	0.19271
f__Xanthomonadaceae	computer screen	Yes	-0.00281555	0.00140833	64	47	0.0504459	0.196373
g__Actinomyces	saliva	Yes	0.0158931	0.00795483	64	54	0.0505905	0.196611
g__Acinetobacter	saliva	Yes	-0.00267898	0.00134236	64	54	0.0508362	0.197241
f__Geodermatophilaceae	computer screen	Yes	0.000332515	0.000166944	64	22	0.0512806	0.198313
g__Bifidobacterium	computer mouse	Yes	0.0016862	0.000846448	64	22	0.0512457	0.198313
o__Rhodospirillales	computer screen	No	0.000211901	0.000107188	64	26	0.0529848	0.204568
g__Propionibacterium	computer mouse	Yes	-0.000635323	0.000321683	64	21	0.0532058	0.205086
g__Mycetocola	computer screen	No	0.000422342	0.00021404	64	32	0.0534163	0.205561
g__Truepera	computer screen	Yes	0.00122129	0.000619628	64	7	0.0536725	0.206211
g__Dietzia	computer screen	No	0.000166896	8.48046e-05	64	9	0.0540265	0.207234
g__Planifilum	computer mouse	Yes	0.00144128	0.000733585	64	35	0.0544167	0.208391
g__Virgibacillus	saliva	No	-0.00782013	0.00398372	64	62	0.0546179	0.208823
f__0319-6G20	computer screen	Yes	0.000383759	0.000196069	64	32	0.055308	0.208888
f__Acetobacteraceae	computer screen	Yes	0.00532328	0.00271716	64	40	0.055083	0.208888
f__Acetobacteraceae	soil	Yes	0.00531434	0.00271716	64	40	0.0554791	0.208888
g__Pasteurella	computer mouse	Yes	-4.9191e-05	2.51555e-05	64	9	0.0555232	0.208888
g__Pasteurella	computer screen	Yes	-4.9191e-05	2.51555e-05	64	9	0.0555232	0.208888
g__Pasteurella	saliva	Yes	-4.9191e-05	2.51555e-05	64	9	0.0555232	0.208888
g__Pasteurella	soil	No	-4.9191e-05	2.51555e-05	64	9	0.0555232	0.208888
g__Pasteurella	soil	Yes	-4.9191e-05	2.51555e-05	64	9	0.0555232	0.208888
g__Virgibacillus	saliva	Yes	-0.00778679	0.00398372	64	62	0.0556234	0.208888
o__JG30-KF-CM45	computer mouse	Yes	-0.000741425	0.000379432	64	28	0.0556975	0.208888
o__JG30-KF-CM45	saliva	No	-0.000742005	0.000379432	64	28	0.0555126	0.208888
o__JG30-KF-CM45	saliva	Yes	-0.000742005	0.000379432	64	28	0.0555126	0.208888
o__Bacillales	computer screen	No	0.00433625	0.00223755	64	52	0.057678	0.215972
f__Caulobacteraceae	computer mouse	Yes	-0.00810811	0.00418871	64	49	0.0579587	0.216679
f__Actinomycetaceae	saliva	Yes	0.000345399	0.000178638	64	18	0.0582345	0.217366
f__Conexibacteraceae	computer screen	Yes	0.00276637	0.00143172	64	26	0.0583993	0.217637
g__Brevibacillus	computer screen	Yes	0.000830062	0.000430806	64	22	0.0590892	0.21986
g__Luteimicrobium	computer screen	Yes	0.00171598	0.000892722	64	28	0.0596751	0.221691
f__Rhodobacteraceae	computer screen	Yes	0.00152369	0.000797947	64	31	0.0613232	0.227448
g__Luteimonas	soil	No	0.000342565	0.000179466	64	19	0.0614178	0.227448
g__Polaromonas	computer screen	No	0.000525248	0.000275441	64	34	0.0616636	0.228001
f__Actinomycetaceae	saliva	No	0.000339194	0.000178638	64	18	0.0627513	0.231659
g__Rubellimicrobium	computer screen	Yes	0.000927721	0.000491683	64	12	0.0643716	0.23727
f__Moraxellaceae	computer screen	No	0.000251831	0.000133859	64	22	0.0651304	0.239692
g__Pseudomonas	saliva	No	-0.0061346	0.003269	64	58	0.0657873	0.241733
g__Brevundimonas	computer screen	Yes	0.000248497	0.000132725	64	15	0.0663935	0.243202
g__Nesterenkonia	computer screen	Yes	0.000405833	0.000216685	64	14	0.0663035	0.243202
g__Paenibacillus	soil	Yes	0.00292777	0.00156528	64	45	0.0666522	0.243771
g__Pseudomonas	saliva	Yes	-0.00609738	0.003269	64	58	0.0673937	0.246102
f__Moraxellaceae	soil	No	0.000248976	0.000133859	64	22	0.0681412	0.248447
