# Supplementary material for: Whole microbial community viability is not quantitatively reflected by propidium monoazide sequencing approach
Source: Microbiome. 2021 Jan 21;9:17. doi: 10.1186/s40168-020-00961-3 (PMC7819323; doi:10.1186/s40168-020-00961-3)
Supplement: Supplementary file 7 — Additional file 6. Relative abundances of several taxa changed significantly after PMA treatment. [file 40168_2020_961_MOESM7_ESM.xlsx]

## Sheet: Diff_sig_Part3
metadata	feature	value	coef	stderr	N	N.not.0	pval	qval
Collection	o__Acidimicrobiales	MBTA grip	-0.00204168	0.0001502	40	17	2.64709e-15	1.48237e-13
Collection	f__Nocardioidaceae	MBTA grip	-0.00437219	0.000396895	40	29	9.24868e-13	3.61344e-11
Collection	o__Sphingomonadales	MBTA grip	-0.00154491	0.000149251	40	20	4.78606e-12	1.64094e-10
Collection	o__Solirubrobacterales	MBTA grip	-0.00298522	0.000297254	40	23	1.04595e-11	3.31547e-10
Collection	c__Gitt-GS-136	MBTA grip	-0.000390451	4.11191e-05	40	14	4.31612e-11	1.27212e-09
Collection	f__Ellin6075	MBTA grip	-0.002513	0.000272627	40	23	9.00124e-11	2.56306e-09
Collection	g__Agrobacterium	MBTA grip	-0.00114491	0.000124852	40	16	1.02191e-10	2.86133e-09
Collection	o__iii1-15	MBTA grip	-0.000789238	9.06513e-05	40	21	3.57381e-10	8.64887e-09
Collection	g__Luteimicrobium	MBTA grip	-0.00135589	0.000159688	40	16	6.45254e-10	1.48497e-08
Collection	g__Planctomyces	MBTA grip	-0.000354425	4.21094e-05	40	11	7.9171e-10	1.72737e-08
Collection	g__Halomonas	MBTA grip	-0.00135286	0.000162238	40	19	9.82766e-10	2.11673e-08
Collection	o__Solibacterales	MBTA grip	-0.000524543	6.32827e-05	40	13	1.12865e-09	2.40017e-08
Collection	f__Sphingobacteriaceae	MBTA grip	-0.000723328	8.90853e-05	40	17	1.81085e-09	3.71003e-08
Collection	g__Terracoccus	MBTA grip	-0.000697658	8.64567e-05	40	21	2.08371e-09	4.16742e-08
Collection	o__JG30-KF-CM45	MBTA grip	-0.000891901	0.000114511	40	16	4.60283e-09	8.84265e-08
Collection	g__Brachybacterium	MBTA grip	-0.00393508	0.000506892	40	32	4.95017e-09	9.34415e-08
Collection	g__Deinococcus	MBTA grip	-0.00475077	0.000630464	40	32	9.48707e-09	1.75146e-07
Collection	f__Nakamurellaceae	MBTA grip	-0.000782155	0.000104594	40	17	1.11855e-08	2.04256e-07
Collection	f__Bacteriovoracaceae	MBTA grip	-0.000286723	3.87695e-05	40	12	1.41797e-08	2.56149e-07
Collection	g__Blastococcus	MBTA grip	-0.00430267	0.000585154	40	24	1.60298e-08	2.83474e-07
Collection	g__Iamia	MBTA grip	-0.000294175	4.02229e-05	40	8	1.79644e-08	3.14376e-07
Collection	o__Gemmatimonadales	MBTA grip	-0.000684894	9.38529e-05	40	16	1.88203e-08	3.25959e-07
Collection	c__Gemmatimonadetes	MBTA grip	-0.000255744	3.61043e-05	40	9	3.50318e-08	5.76995e-07
Collection	f__A4b	MBTA grip	-0.000186345	2.64389e-05	40	8	3.88353e-08	6.33431e-07
Collection	g__Micrococcus	MBTA grip	-0.0146937	0.00212245	40	33	5.59834e-08	8.78991e-07
Collection	f__Sphingomonadaceae	MBTA grip	-0.00447585	0.000646898	40	32	5.66491e-08	8.81208e-07
Collection	g__Pseudonocardia	MBTA grip	-0.00150947	0.000218711	40	25	5.95887e-08	9.18431e-07
Collection	g__Erythrobacter	MBTA grip	-0.00167646	0.00024539	40	13	7.31358e-08	1.11698e-06
Collection	f__Rhodospirillaceae	MBTA grip	-0.000832903	0.000124418	40	20	1.09556e-07	1.61452e-06
Collection	g__Adhaeribacter	MBTA grip	-0.000476389	7.24584e-05	40	11	1.55997e-07	2.23995e-06
Collection	o__Rhizobiales	MBTA grip	-0.00162896	0.000247758	40	23	1.55932e-07	2.23995e-06
Collection	g__Nocardioides	MBTA grip	-0.000350792	5.34735e-05	40	18	1.62854e-07	2.3186e-06
Collection	f__Chitinophagaceae	MBTA grip	-0.00341807	0.000530119	40	28	2.27129e-07	3.15353e-06
Collection	g__Nesterenkonia	MBTA grip	-0.00108503	0.000170064	40	17	2.77583e-07	3.76081e-06
Collection	f__Acetobacteraceae	MBTA grip	-0.00543544	0.000865874	40	29	3.76652e-07	4.86751e-06
Collection	f__Moraxellaceae	MBTA grip	-0.00241654	0.000389645	40	22	4.71566e-07	6.00175e-06
Collection	g__Steroidobacter	MBTA grip	-6.73559e-05	1.08921e-05	40	10	4.97498e-07	6.28418e-06
Collection	g__Bdellovibrio	MBTA grip	-0.000265112	4.33381e-05	40	11	6.06815e-07	7.44123e-06
Collection	g__Kaistobacter	MBTA grip	-0.0016182	0.00026638	40	21	6.88848e-07	8.38597e-06
Collection	g__Paracoccus	MBTA grip	-0.00642451	0.00106126	40	27	7.33637e-07	8.80364e-06
Collection	g__Mycetocola	MBTA grip	-0.00170827	0.000285663	40	23	9.14193e-07	1.07402e-05
Collection	g__Haemophilus	MBTA grip	-0.0055104	0.00092549	40	29	9.88044e-07	1.14477e-05
Collection	g__Ramlibacter	MBTA grip	-0.000829798	0.000139738	40	25	1.03577e-06	1.19184e-05
Collection	f__Conexibacteraceae	MBTA grip	-0.000259454	4.44064e-05	40	12	1.37831e-06	1.57521e-05
Collection	g__Actinoplanes	MBTA grip	-9.76758e-05	1.68122e-05	40	10	1.521e-06	1.72654e-05
Collection	g__Microbacterium	MBTA grip	-0.000513865	8.8579e-05	40	16	1.56067e-06	1.75969e-05
Collection	f__C111	MBTA grip	-0.000373362	6.51077e-05	40	14	1.90554e-06	2.07878e-05
Collection	f__EB1017	MBTA grip	-6.63599e-05	1.17179e-05	40	11	2.36002e-06	2.50939e-05
Collection	f__Microbacteriaceae	MBTA grip	-0.00140038	0.000247907	40	27	2.46326e-06	2.60269e-05
Collection	f__Erythrobacteraceae	MBTA grip	-0.000709721	0.000125712	40	14	2.48722e-06	2.61158e-05
Collection	g__Skermanella	MBTA grip	-0.0015755	0.000281323	40	14	2.84851e-06	2.93589e-05
Collection	f__Micrococcaceae	MBTA grip	-0.00248823	0.000447675	40	25	3.23262e-06	3.29139e-05
Collection	g__Truepera	MBTA grip	-0.000507536	9.33484e-05	40	13	4.647e-06	4.46112e-05
Collection	g__Novosphingobium	MBTA grip	-0.0010848	0.000199932	40	16	4.805e-06	4.58659e-05
Collection	g__Finegoldia	MBTA grip	-0.00288426	0.000532011	40	24	4.86901e-06	4.62143e-05
Collection	g__Cellulomonas	MBTA grip	-0.000602915	0.000111641	40	17	5.1849e-06	4.89362e-05
Collection	f__Gemmataceae	MBTA grip	-0.000110901	2.06036e-05	40	8	5.47009e-06	5.07721e-05
Collection	g__Leuconostoc	MBTA grip	-0.00141006	0.000262109	40	24	5.51773e-06	5.09329e-05
Collection	g__Flavisolibacter	MBTA grip	-0.00158535	0.000294944	40	22	5.59444e-06	5.13588e-05
Collection	o__Sva0725	MBTA grip	-0.000560928	0.000107254	40	16	8.64149e-06	7.6409e-05
Collection	g__Pedobacter	MBTA grip	-0.000838883	0.00016141	40	15	9.52863e-06	8.33755e-05
Collection	g__Acinetobacter	MBTA grip	-0.0208541	0.00405171	40	38	1.10738e-05	9.63938e-05
Collection	c__Gemm-3	MBTA grip	-0.00118745	0.000231969	40	14	1.20407e-05	0.00010427
Collection	g__Rhodoplanes	MBTA grip	-0.00091508	0.000182606	40	21	1.66121e-05	0.000141667
Collection	f__Sinobacteraceae	MBTA grip	-0.000447407	8.93572e-05	40	15	1.68252e-05	0.000142759
Collection	f__Pirellulaceae	MBTA grip	-0.000334998	6.83127e-05	40	13	2.28764e-05	0.000190259
Collection	c__Alphaproteobacteria	MBTA grip	-0.000418867	8.54528e-05	40	19	2.30238e-05	0.000190542
Collection	f__Aurantimonadaceae	MBTA grip	-0.000892163	0.00018342	40	17	2.57582e-05	0.000209052
Collection	g__Dietzia	MBTA grip	-0.00199563	0.000425439	40	18	4.30864e-05	0.000327534
Collection	g__Shinella	MBTA grip	-0.000450311	9.67945e-05	40	14	4.82907e-05	0.000363804
Collection	f__Rhodobacteraceae	MBTA grip	-0.00336313	0.000732626	40	22	5.79545e-05	0.000427033
Collection	g__Arsenicicoccus	MBTA grip	-0.000579588	0.000127974	40	16	6.94909e-05	0.000498909
Collection	g__Williamsia	MBTA grip	-0.000402358	8.90808e-05	40	16	7.20266e-05	0.000514913
Collection	f__Kineosporiaceae	MBTA grip	-0.000416632	9.23635e-05	40	17	7.33081e-05	0.000521854
Collection	g__Gemmata	MBTA grip	-0.000267918	6.00598e-05	40	13	8.49043e-05	0.000591864
Collection	f__Xanthomonadaceae	MBTA grip	-0.00228618	0.000512793	40	28	8.55455e-05	0.000593869
Collection	g__Balneimonas	MBTA grip	-0.000853539	0.000192956	40	13	9.47459e-05	0.000649686
Collection	f__Sporichthyaceae	MBTA grip	-0.000685987	0.000155247	40	16	9.60936e-05	0.000656249
Collection	o__Gaiellales	MBTA grip	-0.000153909	3.48437e-05	40	11	9.65325e-05	0.000656577
Collection	f__Isosphaeraceae	MBTA grip	-0.000377104	8.56728e-05	40	17	0.000101002	0.000681457
Collection	g__Kineococcus	MBTA grip	-0.000401026	9.21789e-05	40	15	0.000117317	0.000782111
Collection	g__Capnocytophaga	MBTA grip	-0.000375317	8.67419e-05	40	15	0.000125727	0.000831579
Collection	g__Asticcacaulis	MBTA grip	-5.51521e-05	1.27633e-05	40	8	0.000127826	0.00083886
Collection	f__mb2424	MBTA grip	-0.000238945	5.62014e-05	40	10	0.000156555	0.000996259
Collection	o__WD2101	MBTA grip	-0.000279518	6.57983e-05	40	16	0.000158151	0.00100262
Collection	g__Eikenella	MBTA grip	-0.000200869	4.73238e-05	40	16	0.000159783	0.00100915
Collection	g__Polaromonas	MBTA grip	-0.00263395	0.000622238	40	24	0.000165243	0.00103585
Collection	g__Geodermatophilus	MBTA grip	-0.00103774	0.00024579	40	19	0.00017058	0.00106139
Collection	g__Wautersiella	MBTA grip	-0.000683727	0.000162021	40	17	0.000171617	0.0010639
Collection	g__Megasphaera	MBTA grip	-9.13304e-05	2.16654e-05	40	12	0.000173871	0.00107391
Collection	g__Chryseobacterium	MBTA grip	-0.00185744	0.000442552	40	25	0.000183407	0.00112866
Collection	f__Hyphomonadaceae	MBTA grip	-0.00020852	4.98658e-05	40	9	0.000191832	0.00117478
Collection	g__Pedomicrobium	MBTA grip	-8.04509e-05	1.92793e-05	40	9	0.000196726	0.00119403
Collection	g__Luteolibacter	MBTA grip	-0.000104197	2.50925e-05	40	9	0.000208695	0.00126118
Collection	g__Afifella	MBTA grip	-0.000151559	3.65429e-05	40	7	0.000211786	0.00127527
Collection	g__Aeromicrobium	MBTA grip	-0.000651522	0.00015743	40	21	0.00021735	0.0013041
Collection	g__Peptococcus	MBTA grip	-8.30261e-05	2.00969e-05	40	7	0.000221911	0.00132673
Collection	f__Intrasporangiaceae	MBTA grip	-0.00258656	0.000629348	40	27	0.000236047	0.00140624
Collection	p__FBP	MBTA grip	-0.000603926	0.000147107	40	14	0.000239175	0.00141984
Collection	g__Brevibacterium	MBTA grip	-0.00269195	0.000659728	40	22	0.000257013	0.00152036
Collection	g__Hymenobacter	MBTA grip	-0.00482608	0.00118504	40	30	0.00026294	0.00154454
Collection	f__Enterobacteriaceae	MBTA grip	0.198762	0.0495794	40	39	0.000315611	0.00182208
Collection	o__[Pedosphaerales]	MBTA grip	-0.000151828	3.79665e-05	40	10	0.000324739	0.00186836
Collection	g__Fimbriimonas	MBTA grip	-0.000246064	6.15658e-05	40	10	0.000326835	0.001874
Collection	g__Faecalibacterium	MBTA grip	-0.000524475	0.000131311	40	18	0.000329299	0.00187533
Collection	g__Modestobacter	MBTA grip	-0.00438371	0.00110076	40	24	0.000340532	0.00193275
Collection	f__Solirubrobacteraceae	MBTA grip	-0.000361109	9.10809e-05	40	14	0.000358253	0.00202648
Collection	g__Peredibacter	MBTA grip	-0.00018087	4.58215e-05	40	11	0.000376554	0.00212285
Collection	f__Acidobacteriaceae	MBTA grip	-0.000283151	7.21266e-05	40	23	0.000400415	0.00224233
Collection	g__Flavobacterium	MBTA grip	-0.00140906	0.000360036	40	20	0.000414435	0.00230546
Collection	g__Rubellimicrobium	MBTA grip	-0.000642544	0.00016604	40	15	0.000469514	0.00256099
Collection	g__Gemmatimonas	MBTA grip	-4.80864e-05	1.27623e-05	40	5	0.000626535	0.00332044
Collection	g__Peptoniphilus	MBTA grip	-0.00230048	0.000615111	40	25	0.00067771	0.00356913
Collection	g__Dokdonella	MBTA grip	-0.000165191	4.43951e-05	40	14	0.000714879	0.00374142
Collection	g__Mycoplana	MBTA grip	-0.000924153	0.000249541	40	16	0.000750894	0.00388154
Collection	g__Erythromicrobium	MBTA grip	-0.000148517	4.01666e-05	40	12	0.000763374	0.00393395
Collection	g__Erwinia	MBTA grip	-0.00370931	0.00100999	40	33	0.00081849	0.00416686
Collection	o__Rhodospirillales	MBTA grip	-0.000248535	6.77224e-05	40	13	0.000824685	0.00418571
Collection	g__Solirubrobacter	MBTA grip	-0.000314285	8.60576e-05	40	16	0.000866892	0.00436041
Collection	g__Devosia	MBTA grip	-0.00151822	0.000415869	40	18	0.000870062	0.00436329
Collection	f__Beijerinckiaceae	MBTA grip	-0.000918863	0.000252721	40	20	0.000906812	0.0045206
Collection	g__Candidatus Nitrososphaera	MBTA grip	-0.00053751	0.000148231	40	14	0.00093171	0.00461733
Collection	o__N1423WL	MBTA grip	-6.07254e-05	1.70155e-05	40	6	0.00109245	0.00535076
Collection	g__Kingella	MBTA grip	-0.000173396	4.86719e-05	40	12	0.00111158	0.00542864
Collection	g__Candidatus Solibacter	MBTA grip	-0.000124426	3.50258e-05	40	12	0.00114317	0.00551876
Collection	g__Cellvibrio	MBTA grip	-0.000702717	0.000198672	40	14	0.00119266	0.00574116
Collection	g__Sphingobacterium	MBTA grip	-0.00210825	0.000597834	40	19	0.00122806	0.00587293
Collection	g__Gardnerella	MBTA grip	-0.00169993	0.000485896	40	21	0.00132623	0.00625863
Collection	f__Cytophagaceae	MBTA grip	-0.00102661	0.000296316	40	20	0.00145587	0.006832
Collection	f__Methylocystaceae	MBTA grip	-0.00139871	0.000404996	40	22	0.00150003	0.00701966
Collection	f__Frankiaceae	MBTA grip	-0.000225056	6.53051e-05	40	15	0.00153083	0.00714386
Collection	f__Lachnospiraceae	MBTA grip	-0.00117287	0.000344532	40	22	0.00171654	0.00794432
Collection	g__Exiguobacterium	MBTA grip	-0.00424929	0.00126581	40	22	0.00195162	0.00881996
Collection	f__[Weeksellaceae]	MBTA grip	-0.0016565	0.000494525	40	36	0.00199056	0.00894156
Collection	f__Ellin517	MBTA grip	-0.000159899	4.80886e-05	40	9	0.00212734	0.00945483
Collection	f__Hyphomicrobiaceae	MBTA grip	-0.000557927	0.00016868	40	18	0.00222995	0.00985872
Collection	g__Phycicoccus	MBTA grip	-0.000143204	4.33145e-05	40	10	0.00223875	0.00987166
Collection	g__Kocuria	MBTA grip	-0.00458758	0.00139383	40	29	0.0023297	0.0102458
Collection	o__BD7-3	MBTA grip	-0.000152813	4.64453e-05	40	10	0.00233702	0.0102512
Collection	g__Brevundimonas	MBTA grip	-0.000832908	0.00025408	40	15	0.00241384	0.0104787
Collection	g__Lactobacillus	MBTA grip	-0.00764059	0.00234396	40	35	0.00253612	0.0109248
Collection	g__Dermabacter	MBTA grip	-0.000127466	3.92527e-05	40	14	0.00262158	0.0111783
Collection	c__Gemm-1	MBTA grip	-9.71625e-05	3.02571e-05	40	11	0.00288645	0.0121818
Collection	f__Haliangiaceae	MBTA grip	-0.000269184	8.38486e-05	40	11	0.00289317	0.0121818
Collection	g__Alicyclobacillus	MBTA grip	-0.000220172	6.87866e-05	40	20	0.0029676	0.0124639
Collection	g__Arthrobacter	MBTA grip	-0.000495143	0.000156174	40	15	0.00321646	0.0132442
Collection	c__Ellin6529	MBTA grip	-0.000390229	0.000123194	40	19	0.00324074	0.0133116
Collection	g__Bifidobacterium	MBTA grip	-0.000194444	6.21655e-05	40	18	0.00359957	0.0143641
Collection	o__DS-18	MBTA grip	-0.000191507	6.16479e-05	40	9	0.00380756	0.0150157
Collection	g__Luteimonas	MBTA grip	-0.0030289	0.00098665	40	18	0.00419053	0.0162589
Collection	g__Catonella	MBTA grip	-9.0808e-05	2.95995e-05	40	7	0.00421232	0.0162756
Collection	g__Legionella	MBTA grip	-0.00027285	9.02743e-05	40	12	0.00474132	0.0178998
Collection	f__Legionellaceae	MBTA grip	-6.27883e-05	2.09336e-05	40	7	0.00503309	0.0187071
Collection	f__Piscirickettsiaceae	MBTA grip	-6.94092e-05	2.32449e-05	40	7	0.00521048	0.0191698
Collection	g__Lapillicoccus	MBTA grip	-0.00548881	0.0018401	40	25	0.00525257	0.0192671
Collection	g__Mycobacterium	MBTA grip	-0.00104262	0.000355647	40	22	0.00599225	0.0216494
Collection	g__Dyadobacter	MBTA grip	-0.000434402	0.000149085	40	13	0.00627205	0.0224193
Collection	f__Pseudonocardiaceae	MBTA grip	-0.000335741	0.000115446	40	16	0.00636204	0.0226926
Collection	g__Prauserella	MBTA grip	-0.00017553	6.13561e-05	40	10	0.00717597	0.0253269
Collection	f__Verrucomicrobiaceae	MBTA grip	-9.76778e-05	3.41863e-05	40	10	0.00724209	0.0255067
Collection	g__Roseomonas	MBTA grip	-0.000172945	6.07692e-05	40	16	0.00745177	0.0261041
Collection	f__S24-7	MBTA grip	0.00308183	0.00108883	40	23	0.00774977	0.0270116
Collection	c__ML635J-21	MBTA grip	-8.3332e-05	2.94996e-05	40	10	0.00785872	0.0272782
Collection	f__Methylobacteriaceae	MBTA grip	-0.000852483	0.000301764	40	20	0.00785596	0.0272782
Collection	g__Aquicella	MBTA grip	-0.000109768	3.89061e-05	40	6	0.00792829	0.0274064
Collection	c__OPB56	MBTA grip	-9.35209e-05	3.31808e-05	40	10	0.00798489	0.027489
Collection	g__Tannerella	MBTA grip	-0.000116079	4.14092e-05	40	9	0.00829824	0.0283932
Collection	c__Betaproteobacteria	MBTA grip	-0.000171436	6.12979e-05	40	14	0.0084333	0.0285644
Collection	g__Porphyromonas	MBTA grip	-0.0015039	0.000540678	40	28	0.00876162	0.0295573
Collection	p__WPS-2	MBTA grip	-0.00021514	7.77196e-05	40	11	0.00905881	0.0304245
Collection	f__Caldilineaceae	MBTA grip	-5.92234e-05	2.15222e-05	40	8	0.00943709	0.0313947
Collection	o__Ellin6067	MBTA grip	-0.000243619	8.86907e-05	40	11	0.00955268	0.0316539
Collection	g__Parvimonas	MBTA grip	-0.000347608	0.000127501	40	13	0.0100514	0.0330457
Collection	o__Myxococcales	MBTA grip	-0.00373875	0.00137896	40	19	0.0104323	0.0340316
Collection	f__UD5	MBTA grip	-1.74473e-05	6.46478e-06	40	5	0.0107581	0.0349431
Collection	g__Frigoribacterium	MBTA grip	-0.000296027	0.000112447	40	12	0.0126538	0.0399593
Collection	f__Caulobacteraceae	MBTA grip	-0.00216191	0.000832709	40	28	0.0138208	0.0424478
Collection	f__AK1AB1_02E	MBTA grip	-0.000116941	4.55081e-05	40	7	0.0147358	0.0447669
Collection	f__Koribacteraceae	MBTA grip	-7.466e-05	2.90422e-05	40	10	0.0146978	0.0447669
Collection	g__Rhodobacter	MBTA grip	-0.000743184	0.000294376	40	19	0.0164161	0.0490731
Collection	g__Amaricoccus	MBTA grip	-0.000919508	0.000367581	40	18	0.0173441	0.0509406
Collection	g__Caulobacter	MBTA grip	-0.000302146	0.000121031	40	15	0.0175544	0.0514685
Collection	g__Nelumbo	MBTA grip	-0.0021796	0.000889091	40	24	0.0195202	0.0559625
Collection	g__Rubrobacter	MBTA grip	-0.000371715	0.00015276	40	15	0.0203704	0.0581023
Collection	f__Aeromonadaceae	MBTA grip	-0.00175824	0.000722984	40	33	0.0204373	0.0581943
Collection	f__Erysipelotrichaceae	MBTA grip	-0.00016853	6.93725e-05	40	10	0.020561	0.0584475
Collection	g__Opitutus	MBTA grip	-5.22467e-05	2.15382e-05	40	9	0.0207335	0.0588383
Collection	f__Phyllobacteriaceae	MBTA grip	-0.00100428	0.00041591	40	15	0.0212787	0.0599802
Collection	g__Mycoplasma	MBTA grip	-0.000328098	0.000136167	40	11	0.0215351	0.060399
Collection	f__Patulibacteraceae	MBTA grip	-0.000304516	0.000126463	40	18	0.0216142	0.060494
Collection	f__Coxiellaceae	MBTA grip	-4.85371e-05	2.02399e-05	40	6	0.0221158	0.0613111
Collection	c__PRR-11	MBTA grip	-0.000316635	0.000133679	40	10	0.0236789	0.0647891
Collection	g__Kaistia	MBTA grip	-4.98255e-05	2.11124e-05	40	7	0.0241539	0.0658742
Collection	f__Bartonellaceae	MBTA grip	-0.00166161	0.000704743	40	21	0.0242804	0.0660595
Collection	g__Sphingomonas	MBTA grip	-0.00581434	0.00249255	40	39	0.0257198	0.0690244
Collection	f__Armatimonadaceae	MBTA grip	-7.25785e-05	3.20138e-05	40	10	0.0298587	0.0783791
Collection	f__Streptomycetaceae	MBTA grip	-6.9232e-05	3.07145e-05	40	13	0.0307502	0.0800937
Collection	o__Ellin329	MBTA grip	-0.00010626	4.71891e-05	40	12	0.0309073	0.0803516
Collection	g__Segetibacter	MBTA grip	-0.000363385	0.000164996	40	17	0.0345191	0.0874693
Collection	f__Paenibacillaceae	MBTA grip	-0.000148905	7.1409e-05	40	16	0.0446258	0.107102
Collection	o__Sphingobacteriales	MBTA grip	-0.000200669	9.6974e-05	40	19	0.0461863	0.10975
Collection	g__Dialister	MBTA grip	-0.000320206	0.00016101	40	17	0.0548264	0.127222
Collection	g__Lampropedia	MBTA grip	-0.000187646	9.54445e-05	40	14	0.0575051	0.132341
Collection	g__Treponema	MBTA grip	-0.000401449	0.000204341	40	13	0.0576756	0.132551
Collection	g__Sediminibacterium	MBTA grip	0.00128181	0.000656432	40	15	0.0591287	0.13552
Collection	f__[Chthoniobacteraceae]	MBTA grip	-0.000283263	0.000145127	40	15	0.059235	0.135579
Collection	f__Solibacteraceae	MBTA grip	-2.95728e-05	1.58149e-05	40	6	0.0701251	0.155834
Collection	g__Facklamia	MBTA grip	-0.000814516	0.000436347	40	21	0.0705917	0.156457
Collection	g__Pasteurella	MBTA grip	-0.000287886	0.000154741	40	14	0.0714918	0.157207
Collection	g__Rothia	MBTA grip	-0.00240448	0.00130062	40	29	0.0732102	0.160341
Collection	o__Streptophyta	MBTA grip	-0.0183468	0.00992725	40	34	0.0732987	0.160341
Collection	g__Bacillus	MBTA grip	-0.0263741	0.0143679	40	39	0.0751725	0.162954
Collection	g__Actinotalea	MBTA grip	-0.00146132	0.000807644	40	11	0.0792443	0.169675
Collection	g__Sporosarcina	MBTA grip	-0.000418506	0.000231413	40	20	0.0793835	0.169675
Collection	g__Jeotgalicoccus	MBTA grip	-0.00126974	0.000706232	40	20	0.0810779	0.172419
Collection	f__Ellin5301	MBTA grip	-5.85771e-05	3.26843e-05	40	10	0.0820023	0.173725
Collection	g__Sphingobium	MBTA grip	-0.00219689	0.00123229	40	22	0.0835539	0.175683
Collection	g__Clostridium	MBTA grip	0.0762379	0.0428899	40	39	0.0844284	0.176741
Collection	g__Meiothermus	MBTA grip	0.0013514	0.000765991	40	7	0.0866738	0.180436
Collection	c__S085	MBTA grip	-0.000269752	0.00015694	40	11	0.0947404	0.192869
Collection	g__Ellin506	MBTA grip	-0.000202486	0.000118233	40	8	0.0958934	0.193631
Collection	f__Neisseriaceae	MBTA grip	-0.0188021	0.0109897	40	36	0.0962139	0.193838
Collection	o__MIZ46	MBTA grip	-9.24424e-05	5.48614e-05	40	12	0.101144	0.202529
Collection	g__Corynebacterium	MBTA grip	-0.0348134	0.0207399	40	39	0.102406	0.204325
Collection	g__Rubrivivax	MBTA grip	-0.000590586	0.00035665	40	18	0.106939	0.210619
Collection	g__Lautropia	MBTA grip	-0.000838036	0.000511745	40	21	0.110728	0.215588
Collection	o__Spirobacillales	MBTA grip	-0.000164999	0.000102866	40	7	0.117959	0.227522
Collection	f__Dietziaceae	MBTA grip	-0.0008885	0.000557103	40	17	0.119999	0.230135
Collection	f__Pseudomonadaceae	MBTA grip	-0.00407395	0.00258472	40	35	0.124248	0.236394
Collection	g__Alloiococcus	MBTA grip	-0.000666807	0.000426108	40	19	0.126873	0.240571
Collection	f__Actinomycetaceae	MBTA grip	-0.000728799	0.000466493	40	17	0.12748	0.241397
Collection	o__SC-I-84	MBTA grip	-0.000152488	9.78896e-05	40	15	0.128552	0.242661
Collection	f__Geodermatophilaceae	MBTA grip	-0.000489084	0.000316987	40	19	0.132109	0.247152
Collection	g__Haemophilus	MBTA seat	0.00924769	0.00109575	40	29	7.43328e-10	1.64315e-08
Collection	o__Acidimicrobiales	MBTA seat	-0.00145652	0.000177832	40	17	1.48512e-09	3.11875e-08
Collection	g__Capnocytophaga	MBTA seat	0.000694475	0.0001027	40	15	8.97408e-08	1.35824e-06
Collection	g__Peptococcus	MBTA seat	0.000151817	2.37941e-05	40	7	2.77327e-07	3.76081e-06
Collection	c__Gitt-GS-136	MBTA seat	-0.000308618	4.86838e-05	40	14	3.13417e-07	4.16454e-06
Collection	g__Alloiococcus	MBTA seat	0.00306152	0.000504499	40	19	7.02054e-07	8.48526e-06
Collection	g__Pseudonocardia	MBTA seat	-0.00155193	0.000258947	40	25	8.78783e-07	1.03969e-05
Collection	g__Adhaeribacter	MBTA seat	-0.000495051	8.57886e-05	40	11	1.71046e-06	1.90302e-05
Collection	c__Gemmatimonadetes	MBTA seat	-0.000242577	4.27464e-05	40	9	2.27893e-06	2.4386e-05
Collection	f__A4b	MBTA seat	-0.000173405	3.13028e-05	40	8	3.41712e-06	3.41712e-05
Collection	f__Ellin6075	MBTA seat	-0.0017856	0.000322782	40	23	3.49675e-06	3.47606e-05
Collection	o__JG30-KF-CM45	MBTA seat	-0.000737821	0.000135578	40	16	4.57736e-06	4.41952e-05
Collection	g__Luteimicrobium	MBTA seat	-0.00100918	0.000189065	40	16	6.25671e-06	5.71265e-05
Collection	o__Solirubrobacterales	MBTA seat	-0.00185893	0.000351939	40	23	7.39385e-06	6.6206e-05
Collection	g__Bacillus	MBTA seat	0.0887008	0.0170112	40	39	9.05504e-06	7.96465e-05
Collection	g__Megasphaera	MBTA seat	0.000126139	2.56512e-05	40	12	2.19687e-05	0.000183619
Collection	g__Catonella	MBTA seat	0.000170194	3.50449e-05	40	7	2.63449e-05	0.000212786
Collection	g__Leuconostoc	MBTA seat	0.0014986	0.000310329	40	24	2.85818e-05	0.000227571
Collection	g__Pasteurella	MBTA seat	0.000883646	0.000183209	40	14	2.90891e-05	0.000230517
Collection	g__Blastococcus	MBTA seat	-0.00333949	0.000692805	40	24	2.93411e-05	0.000231423
Collection	g__Eikenella	MBTA seat	0.000265666	5.603e-05	40	16	3.70701e-05	0.000285678
Collection	g__Rothia	MBTA seat	0.00723936	0.00153989	40	29	4.17737e-05	0.000318999
Collection	g__Iamia	MBTA seat	-0.000221007	4.76227e-05	40	8	4.99523e-05	0.000374216
Collection	g__Veillonella	MBTA seat	0.00669597	0.0014432	40	33	5.01182e-05	0.000374216
Collection	g__Erythrobacter	MBTA seat	-0.00132591	0.000290535	40	13	6.2728e-05	0.000460188
Collection	o__Sphingomonadales	MBTA seat	-0.000805712	0.000176709	40	20	6.35e-05	0.000463826
Collection	f__Sphingomonadaceae	MBTA seat	-0.00348254	0.000765908	40	32	6.59027e-05	0.000477227
Collection	g__Planctomyces	MBTA seat	-0.00022394	4.98563e-05	40	11	7.75387e-05	0.000545042
Collection	o__Solibacterales	MBTA seat	-0.000327362	7.49249e-05	40	13	0.000111078	0.000743468
Collection	g__Kingella	MBTA seat	0.00024798	5.76261e-05	40	12	0.000134678	0.000876971
Collection	g__Skermanella	MBTA seat	-0.00143114	0.000333078	40	14	0.000137274	0.000890426
Collection	g__Balneimonas	MBTA seat	-0.000974864	0.000228454	40	13	0.000149593	0.000962899
Collection	g__Kaistobacter	MBTA seat	-0.00134312	0.000315386	40	21	0.000153372	0.000983454
Collection	f__Nakamurellaceae	MBTA seat	-0.00052717	0.000123837	40	17	0.00015412	0.000984494
Collection	g__Selenomonas	MBTA seat	0.000138386	3.26886e-05	40	7	0.000165026	0.00103585
Collection	g__Parvimonas	MBTA seat	0.000631118	0.000150957	40	13	0.0001923	0.00117478
Collection	f__Nocardioidaceae	MBTA seat	-0.00184228	0.000469912	40	29	0.000406484	0.00226875
Collection	f__Dietziaceae	MBTA seat	0.00252142	0.000659593	40	17	0.00053663	0.00289884
Collection	g__Afifella	MBTA seat	-0.000164737	4.32657e-05	40	7	0.000560075	0.00300615
Collection	g__Nesterenkonia	MBTA seat	-0.000749346	0.00020135	40	17	0.000713528	0.00374142
Collection	g__Halomonas	MBTA seat	-0.000713406	0.000192085	40	19	0.000728909	0.00379123
Collection	g__Deinococcus	MBTA seat	-0.00276538	0.000746451	40	32	0.000748168	0.00387939
Collection	g__Williamsia	MBTA seat	0.000384762	0.000105469	40	16	0.000876452	0.00438226
Collection	f__Gemmataceae	MBTA seat	-8.66787e-05	2.43941e-05	40	8	0.00114049	0.00551876
Collection	f__Hyphomonadaceae	MBTA seat	-0.000208054	5.90396e-05	40	9	0.00123653	0.00588489
Collection	g__Candidatus Nitrososphaera	MBTA seat	-0.000615334	0.000175501	40	14	0.00129876	0.00614626
Collection	c__Gemm-3	MBTA seat	-0.000953242	0.000274645	40	14	0.00143112	0.0067347
Collection	g__Kytococcus	MBTA seat	0.00331048	0.000965637	40	20	0.0016077	0.00748184
Collection	g__Acinetobacter	MBTA seat	0.0162892	0.0047971	40	38	0.00175731	0.00811067
Collection	g__Finegoldia	MBTA seat	0.00211359	0.000629885	40	24	0.00195936	0.00882498
Collection	g__Terracoccus	MBTA seat	-0.000333328	0.000102362	40	21	0.00255887	0.0109666
Collection	g__Facklamia	MBTA seat	0.00165212	0.000516622	40	21	0.00299043	0.0125285
Collection	g__Peptoniphilus	MBTA seat	0.00230336	0.000728274	40	25	0.00328253	0.0134234
Collection	f__Erythrobacteraceae	MBTA seat	-0.000469248	0.00014884	40	14	0.00337102	0.0137126
Collection	g__Asticcacaulis	MBTA seat	-4.75202e-05	1.51113e-05	40	8	0.00344335	0.0138393
Collection	g__Leptotrichia	MBTA seat	0.00324284	0.00103112	40	26	0.00344048	0.0138393
Collection	g__Dermacoccus	MBTA seat	0.00475105	0.00152345	40	27	0.00368796	0.0146127
Collection	g__Caulobacter	MBTA seat	0.000439597	0.000143297	40	15	0.00421421	0.0162756
Collection	f__Pirellulaceae	MBTA seat	-0.000247872	8.08802e-05	40	13	0.00424781	0.0163303
Collection	g__Mycoplana	MBTA seat	-0.00090167	0.00029545	40	16	0.00439228	0.0168087
Collection	f__Gemellaceae	MBTA seat	0.0118541	0.00389046	40	30	0.00444867	0.0169858
Collection	f__Acetobacteraceae	MBTA seat	-0.00309142	0.00102517	40	29	0.00482738	0.0181839
Collection	g__Gemmata	MBTA seat	-0.000213341	7.1109e-05	40	13	0.00502284	0.0187071
Collection	g__Actinoplanes	MBTA seat	-5.96849e-05	1.99051e-05	40	10	0.00504534	0.0187112
Collection	f__Intrasporangiaceae	MBTA seat	-0.00221838	0.00074513	40	27	0.00533053	0.019468
Collection	g__Geodermatophilus	MBTA seat	-0.0008635	0.000291008	40	19	0.00546815	0.0199273
Collection	f__EB1017	MBTA seat	-4.04494e-05	1.38737e-05	40	11	0.00624374	0.0223656
Collection	o__Rhizobiales	MBTA seat	-0.000820463	0.000293338	40	23	0.0084286	0.0285644
Collection	g__Aggregatibacter	MBTA seat	0.00057518	0.000207832	40	16	0.00907302	0.0304245
Collection	f__Microbacteriaceae	MBTA seat	-0.000808386	0.000293515	40	27	0.00938029	0.0312676
Collection	f__Chitinophagaceae	MBTA seat	-0.00170623	0.000627645	40	28	0.0102488	0.0335635
Collection	g__Shinella	MBTA seat	-0.000303335	0.000114602	40	14	0.012221	0.0387381
Collection	o__Gemmatimonadales	MBTA seat	-0.000291212	0.000111119	40	16	0.0130244	0.0408991
Collection	g__Granulicatella	MBTA seat	0.00782782	0.00299893	40	35	0.0133612	0.0417332
Collection	g__Paenibacillus	MBTA seat	0.00277691	0.00106391	40	20	0.0133646	0.0417332
Collection	g__Flavisolibacter	MBTA seat	-0.000908877	0.000349205	40	22	0.0136063	0.0420757
Collection	o__Sva0725	MBTA seat	-0.000330648	0.000126986	40	16	0.0135696	0.0420757
Collection	f__Comamonadaceae	MBTA seat	-0.0105313	0.00405076	40	39	0.0137016	0.0422361
Collection	g__Sphingobacterium	MBTA seat	0.00183687	0.000707818	40	19	0.0138584	0.0424856
Collection	g__[Prevotella]	MBTA seat	0.00279172	0.00108615	40	28	0.0147137	0.0447669
Collection	c__Gemm-1	MBTA seat	-9.16335e-05	3.58235e-05	40	11	0.0151583	0.0458845
Collection	g__Dietzia	MBTA seat	-0.00127983	0.000503707	40	18	0.0157925	0.0473774
Collection	g__Lapillicoccus	MBTA seat	0.00553911	0.00217863	40	25	0.0157299	0.0473774
Collection	g__Steroidobacter	MBTA seat	-3.27673e-05	1.28959e-05	40	10	0.0157891	0.0473774
Collection	g__Truepera	MBTA seat	-0.000277773	0.000110522	40	13	0.0168651	0.0503194
Collection	g__Devosia	MBTA seat	-0.00123427	0.000492376	40	18	0.0171287	0.0507517
Collection	o__iii1-15	MBTA seat	-0.000268535	0.000107328	40	21	0.0173244	0.0509406
Collection	g__Cellulomonas	MBTA seat	-0.000327247	0.00013218	40	17	0.0184349	0.0533057
Collection	f__Micrococcaceae	MBTA seat	-0.00130628	0.000530034	40	25	0.0189305	0.0543645
Collection	f__Moraxellaceae	MBTA seat	-0.00112622	0.000461328	40	22	0.0199951	0.057129
Collection	g__Pedomicrobium	MBTA seat	-5.51471e-05	2.28261e-05	40	9	0.0212137	0.0598976
Collection	g__Enhydrobacter	MBTA seat	0.0043957	0.00184971	40	29	0.023255	0.0638374
Collection	g__Lactococcus	MBTA seat	0.00453293	0.00191123	40	30	0.0235094	0.0644303
Collection	f__Caldilineaceae	MBTA seat	-5.92732e-05	2.54817e-05	40	8	0.02611	0.0699598
Collection	f__Rhodospirillaceae	MBTA seat	-0.000341309	0.000147307	40	20	0.02666	0.0713199
Collection	g__Dokdonella	MBTA seat	0.000119582	5.25625e-05	40	14	0.0293276	0.0773722
Collection	g__Solirubrobacter	MBTA seat	-0.000231405	0.00010189	40	16	0.029588	0.0777901
Collection	g__Campylobacter	MBTA seat	0.000419872	0.000186248	40	15	0.0307283	0.0800937
Collection	g__Erwinia	MBTA seat	0.00268088	0.0011958	40	33	0.0316014	0.0818033
Collection	g__Agrobacterium	MBTA seat	-0.00032867	0.000147821	40	16	0.0329372	0.0847389
Collection	o__OPB54	MBTA seat	0.000123953	5.58022e-05	40	8	0.0330941	0.0848826
Collection	f__C111	MBTA seat	-0.000170485	7.70856e-05	40	14	0.0338153	0.0863369
Collection	g__Corynebacterium	MBTA seat	0.0542796	0.0245554	40	39	0.0339015	0.0864257
Collection	o__Bacillales	MBTA seat	0.00432183	0.00196834	40	36	0.0350374	0.0885155
Collection	g__Mycetocola	MBTA seat	-0.000732752	0.000338217	40	23	0.0373727	0.0935709
Collection	g__Hymenobacter	MBTA seat	-0.00303536	0.00140306	40	30	0.0376308	0.0939102
Collection	f__Ellin517	MBTA seat	-0.000122551	5.69354e-05	40	9	0.0385467	0.0957396
Collection	g__Pseudomonas	MBTA seat	0.0167379	0.00777762	40	39	0.0385808	0.0957396
Collection	f__Beijerinckiaceae	MBTA seat	-0.000642772	0.000299214	40	20	0.0389089	0.0964115
Collection	g__Actinomyces	MBTA seat	0.0073882	0.00347371	40	36	0.0407667	0.0999827
Collection	g__Cohnella	MBTA seat	8.07492e-05	3.79634e-05	40	10	0.0407551	0.0999827
Collection	g__Anaerococcus	MBTA seat	0.00645609	0.00305794	40	30	0.0421797	0.10233
Collection	g__Phycicoccus	MBTA seat	-0.000106494	5.12831e-05	40	10	0.0454673	0.108347
Collection	g__Microbacterium	MBTA seat	-0.000217673	0.000104875	40	16	0.0455688	0.108436
Collection	g__Porphyromonas	MBTA seat	0.00131405	0.000640147	40	28	0.0478596	0.113086
Collection	g__Flavobacterium	MBTA seat	0.000866959	0.000426272	40	20	0.0498327	0.117089
Collection	f__Oxalobacteraceae	MBTA seat	-0.009383	0.00462559	40	39	0.0504003	0.118093
Collection	f__Conexibacteraceae	MBTA seat	-0.000106182	5.25759e-05	40	12	0.0513627	0.120013
Collection	g__Aeromicrobium	MBTA seat	-0.000372462	0.000186393	40	21	0.0537366	0.124865
Collection	g__Rubrobacter	MBTA seat	-0.000357481	0.000180864	40	15	0.0562535	0.129994
Collection	g__Dialister	MBTA seat	0.000376602	0.000190631	40	17	0.0563669	0.130078
Collection	g__Brevibacterium	MBTA seat	0.00153894	0.000781098	40	22	0.0570009	0.13136
Collection	g__Paracoccus	MBTA seat	-0.00246716	0.00125649	40	27	0.0578053	0.132668
Collection	f__Bradyrhizobiaceae	MBTA seat	-0.0045678	0.00234302	40	36	0.059518	0.136041
Collection	g__Microbispora	MBTA seat	0.000122766	6.41417e-05	40	4	0.0640712	0.144707
Collection	g__Bdellovibrio	MBTA seat	-9.79971e-05	5.1311e-05	40	11	0.0646167	0.145713
Collection	g__Arsenicicoccus	MBTA seat	-0.000286331	0.000151517	40	16	0.0673418	0.151249
Collection	f__Aurantimonadaceae	MBTA seat	0.00040975	0.000217164	40	17	0.0677476	0.151957
Collection	g__Erythromicrobium	MBTA seat	-8.93024e-05	4.75561e-05	40	12	0.0690037	0.153952
Collection	c__Ellin6529	MBTA seat	-0.00027198	0.000145858	40	19	0.070875	0.156696
Collection	f__[Weeksellaceae]	MBTA seat	0.00109051	0.000585503	40	36	0.0711901	0.156955
Collection	f__Sinobacteraceae	MBTA seat	-0.000195156	0.000105796	40	15	0.0738169	0.161264
Collection	g__Modestobacter	MBTA seat	-0.00240101	0.00130327	40	24	0.0741667	0.161608
Collection	f__Porphyromonadaceae	MBTA seat	-0.0265203	0.0144318	40	30	0.0748695	0.162507
Collection	g__Prevotella	MBTA seat	0.00477194	0.00262304	40	33	0.0776906	0.16798
Collection	o__[Pedosphaerales]	MBTA seat	-8.03007e-05	4.49512e-05	40	10	0.0829552	0.174862
Collection	g__Mycobacterium	MBTA seat	-0.000744778	0.000421075	40	22	0.0859068	0.179284
Collection	f__Cytophagaceae	MBTA seat	-0.0006145	0.00035083	40	20	0.0888663	0.183635
Collection	f__Solirubrobacteraceae	MBTA seat	-0.000188203	0.000107837	40	14	0.0899744	0.185696
Collection	f__Piscirickettsiaceae	MBTA seat	-4.74737e-05	2.75213e-05	40	7	0.0936115	0.19109
Collection	f__Enterobacteriaceae	MBTA seat	-0.0999237	0.0587005	40	39	0.0978338	0.196369
Collection	f__mb2424	MBTA seat	-0.00011133	6.65407e-05	40	10	0.103484	0.205958
Collection	g__Burkholderia	MBTA seat	0.000133901	8.00575e-05	40	16	0.103592	0.205958
Collection	o__Gaiellales	MBTA seat	-6.85031e-05	4.12539e-05	40	11	0.106005	0.210065
Collection	f__Phyllobacteriaceae	MBTA seat	-0.000815741	0.000492425	40	15	0.106806	0.210604
Collection	f__Isosphaeraceae	MBTA seat	-0.000167278	0.000101434	40	17	0.108332	0.212366
Collection	g__Polaromonas	MBTA seat	-0.00121248	0.000736712	40	24	0.10902	0.213465
Collection	f__Coriobacteriaceae	MBTA seat	-0.000285787	0.000177508	40	17	0.116646	0.225767
Collection	f__Xanthomonadaceae	MBTA seat	0.000971249	0.000607132	40	28	0.11891	0.228569
Collection	g__Coprococcus	MBTA seat	0.000403329	0.000254822	40	15	0.122729	0.234301
Collection	o__WD2101	MBTA seat	-0.000122938	7.79033e-05	40	16	0.123807	0.235823
Collection	g__Sphingomonas	MBTA seat	-0.00455857	0.00295111	40	39	0.131677	0.247152
Collection	o__Acidimicrobiales	MBTA touchscreen	-0.00154796	0.000177832	40	17	3.59038e-10	8.64887e-09
Collection	o__Sphingomonadales	MBTA touchscreen	-0.00112902	0.000176709	40	20	2.70236e-07	3.72128e-06
Collection	g__Planctomyces	MBTA touchscreen	-0.000316024	4.98563e-05	40	11	3.13905e-07	4.16454e-06
Collection	c__Gitt-GS-136	MBTA touchscreen	-0.000305807	4.86838e-05	40	14	3.72093e-07	4.84586e-06
Collection	f__Nocardioidaceae	MBTA touchscreen	-0.0029216	0.000469912	40	29	4.5037e-07	5.77573e-06
Collection	g__Adhaeribacter	MBTA touchscreen	-0.000527241	8.57886e-05	40	11	5.57336e-07	6.9875e-06
Collection	f__Sphingomonadaceae	MBTA touchscreen	-0.00460125	0.000765908	40	32	8.41961e-07	1.00319e-05
Collection	g__Luteimicrobium	MBTA touchscreen	-0.00112854	0.000189065	40	16	9.44643e-07	1.10208e-05
Collection	c__Gemmatimonadetes	MBTA touchscreen	-0.000242577	4.27464e-05	40	9	2.27893e-06	2.4386e-05
Collection	g__Agrobacterium	MBTA touchscreen	-0.000822913	0.000147821	40	16	3.14833e-06	3.22512e-05
Collection	f__A4b	MBTA touchscreen	-0.000173405	3.13028e-05	40	8	3.41712e-06	3.41712e-05
Collection	o__Solibacterales	MBTA touchscreen	-0.000412294	7.49249e-05	40	13	3.81595e-06	3.77106e-05
Collection	o__Solirubrobacterales	MBTA touchscreen	-0.00192359	0.000351939	40	23	4.26451e-06	4.16533e-05
Collection	g__Kaistobacter	MBTA touchscreen	-0.00170055	0.000315386	40	21	5.31875e-06	4.9919e-05
Collection	f__Nakamurellaceae	MBTA touchscreen	-0.00064826	0.000123837	40	17	8.51512e-06	7.56899e-05
Collection	o__iii1-15	MBTA touchscreen	-0.000535499	0.000107328	40	21	1.77322e-05	0.000149699
Collection	g__Balneimonas	MBTA touchscreen	-0.00111651	0.000228454	40	13	2.40385e-05	0.000196998
Collection	f__Pirellulaceae	MBTA touchscreen	-0.000389598	8.08802e-05	40	13	2.9627e-05	0.000232586
Collection	g__Iamia	MBTA touchscreen	-0.000226753	4.76227e-05	40	8	3.49406e-05	0.000270508
Collection	g__Blastococcus	MBTA touchscreen	-0.00318066	0.000692805	40	24	5.78722e-05	0.000427033
Collection	g__Skermanella	MBTA touchscreen	-0.00151638	0.000333078	40	14	6.48057e-05	0.000471314
Collection	f__Acetobacteraceae	MBTA touchscreen	-0.0045472	0.00102517	40	29	9.14499e-05	0.000630894
Collection	g__Steroidobacter	MBTA touchscreen	-5.58786e-05	1.28959e-05	40	10	0.000123462	0.000819824
Collection	f__EB1017	MBTA touchscreen	-6.00087e-05	1.38737e-05	40	11	0.000126262	0.000831844
Collection	c__Alphaproteobacteria	MBTA touchscreen	-0.000411096	0.000101174	40	19	0.000270005	0.00157503
Collection	g__Erythrobacter	MBTA touchscreen	-0.00118068	0.000290535	40	13	0.000269597	0.00157503
Collection	g__Mycobacterium	MBTA touchscreen	-0.00164001	0.000421075	40	22	0.000437312	0.00241672
Collection	g__Candidatus Nitrososphaera	MBTA touchscreen	-0.000679696	0.000175501	40	14	0.000465442	0.00254705
Collection	f__Moraxellaceae	MBTA touchscreen	-0.00177573	0.000461328	40	22	0.000497842	0.00270672
Collection	g__Afifella	MBTA touchscreen	-0.000164737	4.32657e-05	40	7	0.000560075	0.00300615
Collection	f__Erythrobacteraceae	MBTA touchscreen	-0.000559555	0.00014884	40	14	0.000641513	0.00338912
Collection	g__Dietzia	MBTA touchscreen	-0.00187197	0.000503707	40	18	0.000724055	0.00377768
Collection	f__Ellin6075	MBTA touchscreen	-0.00118877	0.000322782	40	23	0.0007953	0.00407349
Collection	g__Gemmata	MBTA touchscreen	-0.000261701	7.1109e-05	40	13	0.000801119	0.00409082
Collection	o__Gemmatimonadales	MBTA touchscreen	-0.000401509	0.000111119	40	16	0.000965578	0.00477109
Collection	f__C111	MBTA touchscreen	-0.000276481	7.70856e-05	40	14	0.00103973	0.00510743
Collection	f__Gemmataceae	MBTA touchscreen	-8.66787e-05	2.43941e-05	40	8	0.00114049	0.00551876
Collection	o__JG30-KF-CM45	MBTA touchscreen	-0.000479232	0.000135578	40	16	0.00120037	0.00576178
Collection	g__Devosia	MBTA touchscreen	-0.00173599	0.000492376	40	18	0.00123052	0.00587293
Collection	g__Deinococcus	MBTA touchscreen	-0.00262048	0.000746451	40	32	0.00128303	0.00608894
Collection	g__Brachybacterium	MBTA touchscreen	-0.00203639	0.000600145	40	32	0.00176907	0.00814258
Collection	g__Actinoplanes	MBTA touchscreen	-6.74e-05	1.99051e-05	40	10	0.00180359	0.00827878
Collection	f__Isosphaeraceae	MBTA touchscreen	-0.00034084	0.000101434	40	17	0.0019346	0.00879261
Collection	g__Pseudonocardia	MBTA touchscreen	-0.000870026	0.000258947	40	25	0.00193647	0.00879261
Collection	g__Solirubrobacter	MBTA touchscreen	-0.000341059	0.00010189	40	16	0.00200322	0.00897444
Collection	c__Gemm-1	MBTA touchscreen	-0.000119296	3.58235e-05	40	11	0.00209881	0.0093528
Collection	g__Mycoplana	MBTA touchscreen	-0.000963669	0.00029545	40	16	0.00252254	0.0108943
Collection	f__Hyphomonadaceae	MBTA touchscreen	-0.000191918	5.90396e-05	40	9	0.00259822	0.0111069
Collection	f__Conexibacteraceae	MBTA touchscreen	-0.000170331	5.25759e-05	40	12	0.00267532	0.0113581
Collection	f__Bradyrhizobiaceae	MBTA touchscreen	0.00742965	0.00234302	40	36	0.003212	0.0132442
Collection	g__Asticcacaulis	MBTA touchscreen	-4.75202e-05	1.51113e-05	40	8	0.00344335	0.0138393
Collection	g__Williamsia	MBTA touchscreen	-0.000330735	0.000105469	40	16	0.00352436	0.0140974
Collection	g__Bdellovibrio	MBTA touchscreen	-0.000160218	5.1311e-05	40	11	0.00365066	0.0145334
Collection	g__Microbacterium	MBTA touchscreen	-0.000324474	0.000104875	40	16	0.00393501	0.0154525
Collection	g__Erythromicrobium	MBTA touchscreen	-0.000144146	4.75561e-05	40	12	0.00463649	0.0176628
Collection	f__Thermoactinomycetaceae	MBTA touchscreen	-0.00016239	5.36138e-05	40	12	0.00466271	0.0177225
Collection	f__Aurantimonadaceae	MBTA touchscreen	-0.000657014	0.000217164	40	17	0.00470487	0.0178424
Collection	g__Thermus	MBTA touchscreen	0.00327472	0.00109059	40	27	0.00499047	0.0186311
Collection	f__Beijerinckiaceae	MBTA touchscreen	-0.000881115	0.000299214	40	20	0.00579383	0.021023
Collection	c__Ellin6529	MBTA touchscreen	-0.000411298	0.000145858	40	19	0.00795815	0.0274532
Collection	c__Gemm-3	MBTA touchscreen	-0.000772308	0.000274645	40	14	0.00811658	0.0278852
Collection	g__Nocardioides	MBTA touchscreen	-0.000176162	6.3311e-05	40	18	0.00874028	0.0295446
Collection	g__Capnocytophaga	MBTA touchscreen	-0.000284671	0.0001027	40	15	0.00897523	0.0302172
Collection	f__Sphingobacteriaceae	MBTA touchscreen	-0.000289057	0.000105474	40	17	0.00970323	0.0320894
Collection	f__Paenibacillaceae	MBTA touchscreen	-0.000229871	8.45461e-05	40	16	0.0102383	0.0335635
Collection	g__Rubrivivax	MBTA touchscreen	0.00114341	0.000422264	40	18	0.010522	0.0342576
Collection	g__Megasphaera	MBTA touchscreen	-6.92125e-05	2.56512e-05	40	12	0.0107741	0.0349431
Collection	g__Flavisolibacter	MBTA touchscreen	-0.000941641	0.000349205	40	22	0.0108192	0.0350215
Collection	f__Streptomycetaceae	MBTA touchscreen	-9.7387e-05	3.6365e-05	40	13	0.0113225	0.0365102
Collection	g__Pedomicrobium	MBTA touchscreen	-6.0746e-05	2.28261e-05	40	9	0.0117982	0.0377543
Collection	f__Sinobacteraceae	MBTA touchscreen	-0.000278934	0.000105796	40	15	0.0125332	0.039653
Collection	o__[Pedosphaerales]	MBTA touchscreen	-0.000117727	4.49512e-05	40	10	0.0130791	0.0409941
Collection	g__Halomonas	MBTA touchscreen	-0.00050101	0.000192085	40	19	0.0134242	0.0418416
Collection	g__Rubrobacter	MBTA touchscreen	-0.00047088	0.000180864	40	15	0.0135799	0.0420757
Collection	o__Rhodospirillales	MBTA touchscreen	-0.000207403	8.01813e-05	40	13	0.0141442	0.0432827
Collection	f__Ruminococcaceae	MBTA touchscreen	0.00557761	0.00218299	40	26	0.0152636	0.0461204
Collection	g__Dokdonella	MBTA touchscreen	-0.000132797	5.25625e-05	40	14	0.0163438	0.048944
Collection	f__Micrococcaceae	MBTA touchscreen	-0.00133176	0.000530034	40	25	0.0168929	0.0503194
Collection	f__Sporichthyaceae	MBTA touchscreen	-0.000460487	0.000183808	40	16	0.0171905	0.050845
Collection	f__Microbacteriaceae	MBTA touchscreen	-0.000734385	0.000293515	40	27	0.0173224	0.0509406
Collection	f__Methylobacteriaceae	MBTA touchscreen	-0.000888996	0.00035728	40	20	0.017899	0.0523872
Collection	c__C0119	MBTA touchscreen	0.00146296	0.000589881	40	8	0.0182474	0.0529458
Collection	f__Bacteriovoracaceae	MBTA touchscreen	-0.000113858	4.5902e-05	40	12	0.0182313	0.0529458
Collection	f__Piscirickettsiaceae	MBTA touchscreen	-6.81729e-05	2.75213e-05	40	7	0.0183768	0.0532292
Collection	c__ML635J-21	MBTA touchscreen	-8.63161e-05	3.49266e-05	40	10	0.0186277	0.0537705
Collection	g__Kineococcus	MBTA touchscreen	0.000266602	0.000109137	40	15	0.0199218	0.0570165
Collection	g__Haemophilus	MBTA touchscreen	-0.00264423	0.00109575	40	29	0.021353	0.0600888
Collection	o__BD7-3	MBTA touchscreen	-0.000132617	5.49899e-05	40	10	0.0214278	0.0601986
Collection	f__Frankiaceae	MBTA touchscreen	-0.000185957	7.73193e-05	40	15	0.0217602	0.060726
Collection	g__Exiguobacterium	MBTA touchscreen	0.00360026	0.00149868	40	22	0.0219007	0.0610169
Collection	g__Geodermatophilus	MBTA touchscreen	-0.000698405	0.000291008	40	19	0.0220201	0.0611466
Collection	g__Cellulomonas	MBTA touchscreen	-0.000316458	0.00013218	40	17	0.0223195	0.0616724
Collection	g__Actinotalea	MBTA touchscreen	0.00227456	0.000956227	40	11	0.0231343	0.0636098
Collection	f__Solirubrobacteraceae	MBTA touchscreen	-0.000253719	0.000107837	40	14	0.0245587	0.0666537
Collection	c__S085	MBTA touchscreen	0.000436766	0.000185812	40	11	0.0246847	0.0667798
Collection	f__Actinomycetaceae	MBTA touchscreen	0.00129102	0.000552314	40	17	0.0254386	0.0683789
Collection	g__Paracoccus	MBTA touchscreen	-0.00290265	0.00125649	40	27	0.0270819	0.0722495
Collection	g__Pedobacter	MBTA touchscreen	-0.000441437	0.000191105	40	15	0.0270936	0.0722495
Collection	g__Candidatus Protochlamydia	MBTA touchscreen	-9.86101e-05	4.31613e-05	40	9	0.0286939	0.0762748
Collection	g__Modestobacter	MBTA touchscreen	-0.00297053	0.00130327	40	24	0.0290467	0.0770907
Collection	o__Lactobacillales	MBTA touchscreen	0.00539619	0.00237088	40	21	0.0292624	0.0773722
Collection	f__Ellin517	MBTA touchscreen	-0.000129451	5.69354e-05	40	9	0.0294199	0.0774694
Collection	f__Caldilineaceae	MBTA touchscreen	-5.77322e-05	2.54817e-05	40	8	0.0299575	0.0784717
Collection	g__Staphylococcus	MBTA touchscreen	0.00583594	0.00257635	40	37	0.0299874	0.0784717
Collection	f__Phyllobacteriaceae	MBTA touchscreen	-0.00108936	0.000492425	40	15	0.0337709	0.0863369
Collection	g__Alloiococcus	MBTA touchscreen	-0.00111348	0.000504499	40	19	0.0341591	0.0866878
Collection	g__Brevundimonas	MBTA touchscreen	-0.000659577	0.000300823	40	15	0.0352795	0.0889932
Collection	f__mb2424	MBTA touchscreen	-0.000144673	6.65407e-05	40	10	0.0367435	0.0922707
Collection	f__Chitinophagaceae	MBTA touchscreen	-0.00136129	0.000627645	40	28	0.0371779	0.0932223
Collection	f__Geodermatophilaceae	MBTA touchscreen	-0.000811724	0.000375303	40	19	0.0376759	0.0939102
Collection	f__Neisseriaceae	MBTA touchscreen	0.0280621	0.0130115	40	36	0.0381885	0.095047
Collection	g__Pullulanibacillus	MBTA touchscreen	-0.000263581	0.000124562	40	18	0.0417414	0.101779
Collection	f__Planococcaceae	MBTA touchscreen	0.00236398	0.00112268	40	36	0.0426959	0.103207
Collection	o__Rhizobiales	MBTA touchscreen	-0.00061455	0.000293338	40	23	0.0436919	0.105463
Collection	f__0319-6G20	MBTA touchscreen	0.000879118	0.000420595	40	13	0.0441525	0.10627
Collection	f__Rhodospirillaceae	MBTA touchscreen	-0.000307305	0.000147307	40	20	0.0445385	0.107045
Collection	g__Peredibacter	MBTA touchscreen	-0.00011292	5.42513e-05	40	11	0.0449959	0.107529
Collection	g__Gordonia	MBTA touchscreen	-0.000537746	0.000258753	40	19	0.0453072	0.10812
Collection	g__Arsenicicoccus	MBTA touchscreen	-0.000312304	0.000151517	40	16	0.0470001	0.111526
Collection	g__Terracoccus	MBTA touchscreen	-0.000210531	0.000102362	40	21	0.0474511	0.112279
Collection	o__WD2101	MBTA touchscreen	-0.000159717	7.79033e-05	40	16	0.0481198	0.113541
Collection	g__Phycicoccus	MBTA touchscreen	-0.000104787	5.12831e-05	40	10	0.0488337	0.115064
Collection	p__FBP	MBTA touchscreen	-0.000354094	0.00017417	40	14	0.0499162	0.117122
Collection	g__Bacteroides	MBTA touchscreen	0.00396807	0.00196709	40	22	0.051622	0.120451
Collection	g__Chryseobacterium	MBTA touchscreen	-0.00105606	0.000523968	40	25	0.0518114	0.120726
Collection	g__Aeromicrobium	MBTA touchscreen	-0.000373783	0.000186393	40	21	0.0529381	0.12318
Collection	f__Xanthomonadaceae	MBTA touchscreen	-0.00120128	0.000607132	40	28	0.0560067	0.129602
Collection	g__Caulobacter	MBTA touchscreen	-0.000277676	0.000143297	40	15	0.0609945	0.138661
Collection	f__[Chthoniobacteraceae]	MBTA touchscreen	-0.000331983	0.000171826	40	15	0.0617164	0.140113
Collection	o__Sva0725	MBTA touchscreen	-0.000241471	0.000126986	40	16	0.0657306	0.148026
Collection	g__Burkholderia	MBTA touchscreen	-0.000151414	8.00575e-05	40	16	0.0671274	0.150969
Collection	g__Ammoniphilus	MBTA touchscreen	-0.000125797	6.71986e-05	40	12	0.0698259	0.15558
Collection	f__Methylocystaceae	MBTA touchscreen	-0.000896729	0.000479503	40	22	0.0700969	0.155834
Collection	o__Cytophagales	MBTA touchscreen	-2.95564e-05	1.58235e-05	40	6	0.0704169	0.156275
Collection	g__Lactobacillus	MBTA touchscreen	0.00516576	0.00277517	40	35	0.0713489	0.157098
Collection	g__Polaromonas	MBTA touchscreen	0.00134638	0.000736712	40	24	0.0764037	0.16541
Collection	f__Kineosporiaceae	MBTA touchscreen	-0.000198463	0.000109356	40	17	0.0783791	0.168606
Collection	g__Parvimonas	MBTA touchscreen	-0.000271558	0.000150957	40	13	0.0809156	0.172292
Collection	o__DS-18	MBTA touchscreen	-0.000130669	7.29893e-05	40	9	0.0823236	0.174186
Collection	f__Pasteurellaceae	MBTA touchscreen	0.00120451	0.000673631	40	24	0.0826782	0.174704
Collection	f__Verrucomicrobiaceae	MBTA touchscreen	-7.19713e-05	4.04755e-05	40	10	0.084325	0.176741
Collection	g__Dyadobacter	MBTA touchscreen	-0.000313703	0.000176513	40	13	0.0844778	0.176741
Collection	g__Arthrobacter	MBTA touchscreen	-0.00032396	0.000184906	40	15	0.0887844	0.183635
Collection	g__Rhodobacter	MBTA touchscreen	0.000607985	0.000348532	40	19	0.0901217	0.185772
Collection	g__Peptococcus	MBTA touchscreen	-4.14838e-05	2.37941e-05	40	7	0.0902936	0.185899
Collection	o__MIZ46	MBTA touchscreen	-0.000113166	6.49543e-05	40	12	0.0905062	0.186108
Collection	g__Leuconostoc	MBTA touchscreen	-0.000539317	0.000310329	40	24	0.0912815	0.187043
Collection	g__Sporosarcina	MBTA touchscreen	-0.000476138	0.000273986	40	20	0.0912946	0.187043
Collection	g__Wautersiella	MBTA touchscreen	-0.000332421	0.000191828	40	17	0.0921746	0.188616
Collection	g__SMB53	MBTA touchscreen	0.0010572	0.000610653	40	23	0.0924723	0.188994
Collection	g__Hyphomicrobium	MBTA touchscreen	0.000429423	0.00024989	40	12	0.0948101	0.192869
Collection	g__Lapillicoccus	MBTA touchscreen	-0.00373388	0.00217863	40	25	0.0956576	0.19362
Collection	g__Rothia	MBTA touchscreen	-0.00264018	0.00153989	40	29	0.0955369	0.19362
Collection	c__OPB56	MBTA touchscreen	-6.72093e-05	3.9285e-05	40	10	0.0962269	0.193838
Collection	g__Actinomycetospora	MBTA touchscreen	-0.000894155	0.00052316	40	18	0.0965387	0.194234
Collection	f__Clostridiaceae	MBTA touchscreen	0.00269904	0.00158301	40	29	0.0973168	0.195565
Collection	g__Dialister	MBTA touchscreen	-0.000321454	0.000190631	40	17	0.100901	0.202283
Collection	g__Catonella	MBTA touchscreen	-5.87777e-05	3.50449e-05	40	7	0.102673	0.204615
Collection	f__Erysipelotrichaceae	MBTA touchscreen	0.000136705	8.2135e-05	40	10	0.105225	0.208958
Collection	g__Luteolibacter	MBTA touchscreen	-4.93282e-05	2.97088e-05	40	9	0.106033	0.210065
Collection	f__Alicyclobacillaceae	MBTA touchscreen	-1.842e-05	1.10995e-05	40	7	0.106204	0.210131
Collection	g__Luteimonas	MBTA touchscreen	0.00193797	0.00116816	40	18	0.106316	0.210131
Collection	g__Dermacoccus	MBTA touchscreen	-0.0025159	0.00152345	40	27	0.107855	0.211926
Collection	g__Enhydrobacter	MBTA touchscreen	-0.00305579	0.00184971	40	29	0.107733	0.211926
Collection	g__Fimbriimonas	MBTA touchscreen	-0.000119464	7.28921e-05	40	10	0.110454	0.21552
Collection	f__Gaiellaceae	MBTA touchscreen	-0.000652638	0.000400661	40	22	0.112565	0.218623
Collection	g__Bulleidia	MBTA touchscreen	-7.83998e-05	4.87729e-05	40	11	0.117205	0.226588
Collection	g__Sphingomonas	MBTA touchscreen	-0.00472194	0.00295111	40	39	0.118838	0.228569
Collection	o__Sphingobacteriales	MBTA touchscreen	-0.0001827	0.000114814	40	19	0.120806	0.231156
Collection	g__Planifilum	MBTA touchscreen	0.000499129	0.000314253	40	14	0.121476	0.232172
Collection	f__Comamonadaceae	MBTA touchscreen	0.00639306	0.00405076	40	39	0.123771	0.235823
Collection	f__[Weeksellaceae]	MBTA touchscreen	0.000919882	0.000585503	40	36	0.125421	0.238087
Collection	g__Facklamia	MBTA touchscreen	-0.000806862	0.000516622	40	21	0.127596	0.241397
Collection	g__Rubellimicrobium	MBTA touchscreen	-0.000306725	0.000196587	40	15	0.127961	0.241817
Collection	g__Tannerella	MBTA touchscreen	7.62901e-05	4.90273e-05	40	9	0.128951	0.243139
Collection	o__OPB54	MBTA touchscreen	-8.61097e-05	5.58022e-05	40	8	0.132058	0.247152
Collection	g__Jeotgalicoccus	MBTA touchscreen	0.00128515	0.000836157	40	20	0.133557	0.249306
Collection	o__Acidimicrobiales	MBTA wall	0.00575291	0.000177832	40	17	4.00726e-27	6.73219e-24
Collection	c__Gitt-GS-136	MBTA wall	0.00120655	4.86838e-05	40	14	2.3982e-23	2.01449e-20
Collection	o__Solirubrobacterales	MBTA wall	0.00792103	0.000351939	40	23	5.28636e-22	2.96036e-19
Collection	g__Adhaeribacter	MBTA wall	0.00188019	8.57886e-05	40	11	1.23298e-21	4.28052e-19
Collection	g__Planctomyces	MBTA wall	0.00109156	4.98563e-05	40	11	1.27397e-21	4.28052e-19
Collection	f__A4b	MBTA wall	0.000658762	3.13028e-05	40	8	4.46971e-21	1.1474e-18
Collection	o__Sphingomonadales	MBTA wall	0.0037109	0.000176709	40	20	4.78083e-21	1.1474e-18
Collection	c__Gemmatimonadetes	MBTA wall	0.00086469	4.27464e-05	40	9	1.55773e-20	2.90777e-18
Collection	g__Iamia	MBTA wall	0.000965124	4.76227e-05	40	8	1.46916e-20	2.90777e-18
Collection	o__JG30-KF-CM45	MBTA wall	0.00264897	0.000135578	40	16	4.62914e-20	7.77696e-18
Collection	f__Ellin6075	MBTA wall	0.00621143	0.000322782	40	23	7.44683e-20	1.13733e-17
Collection	g__Agrobacterium	MBTA wall	0.00281828	0.000147821	40	16	9.95086e-20	1.39312e-17
Collection	f__Nocardioidaceae	MBTA wall	0.00867244	0.000469912	40	29	2.73446e-19	3.53376e-17
Collection	g__Pseudonocardia	MBTA wall	0.00474579	0.000258947	40	25	3.39376e-19	4.07251e-17
Collection	g__Luteimicrobium	MBTA wall	0.00342243	0.000189065	40	16	4.97611e-19	5.57324e-17
Collection	o__Solibacterales	MBTA wall	0.00129926	7.49249e-05	40	13	1.86536e-18	1.95863e-16
Collection	g__Balneimonas	MBTA wall	0.00391103	0.000228454	40	13	2.7638e-18	2.73128e-16
Collection	f__Nakamurellaceae	MBTA wall	0.00207669	0.000123837	40	17	5.18861e-18	4.8427e-16
Collection	g__Halomonas	MBTA wall	0.00318187	0.000192085	40	19	7.53719e-18	6.66447e-16
Collection	f__Pirellulaceae	MBTA wall	0.00129823	8.08802e-05	40	13	1.95429e-17	1.64161e-15
Collection	f__Sphingomonadaceae	MBTA wall	0.0121748	0.000765908	40	32	2.61943e-17	2.09554e-15
Collection	g__Erythrobacter	MBTA wall	0.0046023	0.000290535	40	13	2.90783e-17	2.22053e-15
Collection	g__Terracoccus	MBTA wall	0.00157206	0.000102362	40	21	7.34849e-17	5.36759e-15
Collection	o__iii1-15	MBTA wall	0.00163657	0.000107328	40	21	9.09783e-17	6.36848e-15
Collection	g__Skermanella	MBTA wall	0.00496931	0.000333078	40	14	1.73855e-16	1.1683e-14
Collection	g__Afifella	MBTA wall	0.000625781	4.32657e-05	40	7	4.34097e-16	2.80493e-14
Collection	g__Steroidobacter	MBTA wall	0.000185895	1.28959e-05	40	10	4.79246e-16	2.98198e-14
Collection	f__Hyphomonadaceae	MBTA wall	0.00083321	5.90396e-05	40	9	8.91102e-16	5.34661e-14
Collection	f__Gemmataceae	MBTA wall	0.000336802	2.43941e-05	40	8	1.68605e-15	9.76747e-14
Collection	f__EB1017	MBTA wall	0.000175207	1.38737e-05	40	11	2.16064e-14	1.17093e-12
Collection	g__Blastococcus	MBTA wall	0.00867818	0.000692805	40	24	2.7182e-14	1.39748e-12
Collection	g__Candidatus Nitrososphaera	MBTA wall	0.00219759	0.000175501	40	14	2.74505e-14	1.39748e-12
Collection	g__Actinoplanes	MBTA wall	0.000245802	1.99051e-05	40	10	4.05583e-14	2.00406e-12
Collection	f__Rhodospirillaceae	MBTA wall	0.00179198	0.000147307	40	20	6.16141e-14	2.95748e-12
Collection	g__Nesterenkonia	MBTA wall	0.00241675	0.00020135	40	17	8.94344e-14	4.1736e-12
Collection	f__Bacteriovoracaceae	MBTA wall	0.000546567	4.5902e-05	40	12	1.11522e-13	5.06369e-12
Collection	g__Brachybacterium	MBTA wall	0.00711682	0.000600145	40	32	1.24888e-13	5.52138e-12
Collection	g__Deinococcus	MBTA wall	0.00873338	0.000746451	40	32	1.80852e-13	7.79057e-12
Collection	g__Dietzia	MBTA wall	0.00588306	0.000503707	40	18	1.89687e-13	7.96687e-12
Collection	f__Erythrobacteraceae	MBTA wall	0.0017318	0.00014884	40	14	2.10448e-13	8.62323e-12
Collection	c__Gemm-1	MBTA wall	0.000398015	3.58235e-05	40	11	7.35662e-13	2.94265e-11
Collection	g__Kaistobacter	MBTA wall	0.003452	0.000315386	40	21	1.09842e-12	4.19398e-11
Collection	o__Sva0725	MBTA wall	0.00137923	0.000126986	40	16	1.34879e-12	5.03547e-11
Collection	g__Asticcacaulis	MBTA wall	0.000160349	1.51113e-05	40	8	2.49916e-12	9.12736e-11
Collection	f__C111	MBTA wall	0.000815459	7.70856e-05	40	14	2.70935e-12	9.6845e-11
Collection	c__Gemm-3	MBTA wall	0.00287071	0.000274645	40	14	3.71126e-12	1.29894e-10
Collection	g__Shinella	MBTA wall	0.00117474	0.000114602	40	14	6.16571e-12	2.07168e-10
Collection	o__Rhizobiales	MBTA wall	0.00296646	0.000293338	40	23	8.7466e-12	2.88123e-10
Collection	g__Pedomicrobium	MBTA wall	0.000229312	2.28261e-05	40	9	1.03695e-11	3.31547e-10
Collection	g__Bdellovibrio	MBTA wall	0.000506552	5.1311e-05	40	11	1.61999e-11	5.03996e-10
Collection	f__Moraxellaceae	MBTA wall	0.00438321	0.000461328	40	22	4.25252e-11	1.27212e-09
Collection	g__Erythromicrobium	MBTA wall	0.000451636	4.75561e-05	40	12	4.30167e-11	1.27212e-09
Collection	g__Gemmata	MBTA wall	0.000656287	7.1109e-05	40	13	8.72792e-11	2.52809e-09
Collection	f__Intrasporangiaceae	MBTA wall	0.00676499	0.00074513	40	27	1.30428e-10	3.53418e-09
Collection	o__Gemmatimonadales	MBTA wall	0.00100911	0.000111119	40	16	1.29599e-10	3.53418e-09
Collection	g__Devosia	MBTA wall	0.00446525	0.000492376	40	18	1.3403e-10	3.57413e-09
Collection	c__Alphaproteobacteria	MBTA wall	0.000908496	0.000101174	40	19	1.70349e-10	4.47166e-09
Collection	f__Conexibacteraceae	MBTA wall	0.000465143	5.25759e-05	40	12	2.43695e-10	6.29857e-09
Collection	g__Arsenicicoccus	MBTA wall	0.00133666	0.000151517	40	16	2.60959e-10	6.64259e-09
Collection	g__Ramlibacter	MBTA wall	0.00144478	0.000165445	40	25	3.32592e-10	8.33962e-09
Collection	g__Mycobacterium	MBTA wall	0.00366473	0.000421075	40	22	3.6037e-10	8.64887e-09
Collection	o__[Pedosphaerales]	MBTA wall	0.00038416	4.49512e-05	40	10	5.54143e-10	1.31121e-08
Collection	g__Solirubrobacter	MBTA wall	0.000868458	0.00010189	40	16	5.89743e-10	1.37607e-08
Collection	f__Caldilineaceae	MBTA wall	0.000215513	2.54817e-05	40	8	7.07311e-10	1.58438e-08
Collection	f__Sphingobacteriaceae	MBTA wall	0.00089247	0.000105474	40	17	6.9969e-10	1.58438e-08
Collection	f__Piscirickettsiaceae	MBTA wall	0.000225244	2.75213e-05	40	7	1.5103e-09	3.13247e-08
Collection	f__Microbacteriaceae	MBTA wall	0.00236884	0.000293515	40	27	2.07699e-09	4.16742e-08
Collection	g__Flavisolibacter	MBTA wall	0.00276949	0.000349205	40	22	3.07824e-09	6.08405e-08
Collection	f__Ellin517	MBTA wall	0.000443331	5.69354e-05	40	9	4.63187e-09	8.84265e-08
Collection	f__Streptomycetaceae	MBTA wall	0.000283331	3.6365e-05	40	13	4.56995e-09	8.84265e-08
Collection	f__Isosphaeraceae	MBTA wall	0.000776089	0.000101434	40	17	6.81077e-09	1.27134e-07
Collection	f__Sinobacteraceae	MBTA wall	0.000779842	0.000105796	40	15	1.52139e-08	2.71908e-07
Collection	f__Phyllobacteriaceae	MBTA wall	0.00356257	0.000492425	40	15	2.25727e-08	3.86961e-07
Collection	f__Aurantimonadaceae	MBTA wall	0.00154963	0.000217164	40	17	3.00888e-08	5.10391e-07
Collection	o__Gaiellales	MBTA wall	0.000294241	4.12539e-05	40	11	3.03804e-08	5.10391e-07
Collection	g__Microbacterium	MBTA wall	0.000747492	0.000104875	40	16	3.08226e-08	5.12692e-07
Collection	g__Paracoccus	MBTA wall	0.00877082	0.00125649	40	27	4.73295e-08	7.64554e-07
Collection	g__Nocardioides	MBTA wall	0.000440898	6.3311e-05	40	18	4.96508e-08	7.94413e-07
Collection	g__Mycetocola	MBTA wall	0.00235364	0.000338217	40	23	5.03869e-08	7.98585e-07
Collection	g__Geodermatophilus	MBTA wall	0.00196435	0.000291008	40	19	9.29739e-08	1.39461e-06
Collection	g__Cellvibrio	MBTA wall	0.00158042	0.000235221	40	14	1.0195e-07	1.51572e-06
Collection	f__Thermoactinomycetaceae	MBTA wall	0.000356401	5.36138e-05	40	12	1.25788e-07	1.83759e-06
Collection	g__Mycoplana	MBTA wall	0.00193202	0.00029545	40	16	1.73207e-07	2.44528e-06
Collection	o__Rhodospirillales	MBTA wall	0.000521157	8.01813e-05	40	13	1.94709e-07	2.72593e-06
Collection	f__Chitinophagaceae	MBTA wall	0.00397784	0.000627645	40	28	3.1482e-07	4.16454e-06
Collection	g__Cellulomonas	MBTA wall	0.000832826	0.00013218	40	17	3.51452e-07	4.6128e-06
Collection	c__ML635J-21	MBTA wall	0.000213986	3.49266e-05	40	10	5.89954e-07	7.31243e-06
Collection	g__Aquicella	MBTA wall	0.000282168	4.60637e-05	40	6	5.91958e-07	7.31243e-06
Collection	g__Rhodoplanes	MBTA wall	0.00124865	0.0002162	40	21	1.68599e-06	1.8883e-05
Collection	o__BD7-3	MBTA wall	0.000317111	5.49899e-05	40	10	1.73044e-06	1.91259e-05
Collection	g__Ammoniphilus	MBTA wall	0.000386467	6.71986e-05	40	12	1.81323e-06	1.991e-05
Collection	f__mb2424	MBTA wall	0.000380161	6.65407e-05	40	10	2.03125e-06	2.20162e-05
Collection	g__Phycicoccus	MBTA wall	0.000288244	5.12831e-05	40	10	2.6803e-06	2.79684e-05
Collection	g__Gemmatimonas	MBTA wall	8.47883e-05	1.51102e-05	40	5	2.75626e-06	2.85834e-05
Collection	f__Cytophagaceae	MBTA wall	0.00194581	0.00035083	40	20	3.34919e-06	3.38954e-05
Collection	c__Ellin6529	MBTA wall	0.000800207	0.000145858	40	19	4.00987e-06	3.93952e-05
Collection	g__Kocuria	MBTA wall	0.00900352	0.00165026	40	29	4.39216e-06	4.26522e-05
Collection	g__Candidatus Protochlamydia	MBTA wall	0.000232454	4.31613e-05	40	9	5.41921e-06	5.05793e-05
Collection	f__Acetobacteraceae	MBTA wall	0.00542483	0.00102517	40	29	7.18272e-06	6.52269e-05
Collection	g__Rubrobacter	MBTA wall	0.000956585	0.000180864	40	15	7.24035e-06	6.53967e-05
Collection	g__Faecalibacterium	MBTA wall	0.000821074	0.000155468	40	18	7.40876e-06	6.6206e-05
Collection	f__Micrococcaceae	MBTA wall	0.00269761	0.000530034	40	25	1.31496e-05	0.000113289
Collection	o__N1423WL	MBTA wall	0.000102497	2.01458e-05	40	6	1.32195e-05	0.00011331
Collection	g__Truepera	MBTA wall	0.00054128	0.000110522	40	13	2.33166e-05	0.000192019
Collection	g__Peredibacter	MBTA wall	0.000264914	5.42513e-05	40	11	2.43386e-05	0.000198489
Collection	f__Sporichthyaceae	MBTA wall	0.000890433	0.000183808	40	16	2.73115e-05	0.000219538
Collection	f__Xanthomonadaceae	MBTA wall	0.00293837	0.000607132	40	28	2.76871e-05	0.000221497
Collection	g__Actinomycetospora	MBTA wall	0.00250171	0.00052316	40	18	3.28783e-05	0.00025691
Collection	g__Brevundimonas	MBTA wall	0.0014326	0.000300823	40	15	3.48555e-05	0.000270508
Collection	g__Aeromicrobium	MBTA wall	0.000882417	0.000186393	40	21	3.78841e-05	0.000290618
Collection	o__WD2101	MBTA wall	0.000353585	7.79033e-05	40	16	6.75102e-05	0.000486769
Collection	o__Myxococcales	MBTA wall	0.00735026	0.00163264	40	19	7.52157e-05	0.000530934
Collection	g__Sporosarcina	MBTA wall	0.00122423	0.000273986	40	20	8.30877e-05	0.000581614
Collection	o__Cytophagales	MBTA wall	7.01752e-05	1.58235e-05	40	6	9.16298e-05	0.000630894
Collection	g__Chthoniobacter	MBTA wall	0.000183188	4.15424e-05	40	8	9.86686e-05	0.0006684
Collection	f__Beijerinckiaceae	MBTA wall	0.00130834	0.000299214	40	20	0.000109984	0.000739093
Collection	g__Modestobacter	MBTA wall	0.00562256	0.00130327	40	24	0.000130445	0.000852717
Collection	g__Hymenobacter	MBTA wall	0.00572194	0.00140306	40	30	0.000258653	0.00152469
Collection	f__Coxiellaceae	MBTA wall	9.72501e-05	2.39634e-05	40	6	0.000273924	0.00159236
Collection	o__Sphingobacteriales	MBTA wall	0.000458676	0.000114814	40	19	0.000328559	0.00187533
Collection	g__Megasphaera	MBTA wall	0.000101087	2.56512e-05	40	12	0.000383526	0.00215493
Collection	g__Dokdonella	MBTA wall	0.000205588	5.25625e-05	40	14	0.000417247	0.00231345
Collection	o__Rickettsiales	MBTA wall	7.90081e-05	2.03378e-05	40	6	0.000449949	0.00247031
Collection	f__Verrucomicrobiaceae	MBTA wall	0.000155455	4.04755e-05	40	10	0.000509908	0.00276337
Collection	o__DS-18	MBTA wall	0.000277423	7.29893e-05	40	9	0.000570771	0.00305381
Collection	f__Myxococcaceae	MBTA wall	8.18916e-05	2.16098e-05	40	6	0.000589296	0.00314291
Collection	g__Novosphingobium	MBTA wall	0.000895302	0.000236713	40	16	0.000601626	0.00319852
Collection	f__Haliangiaceae	MBTA wall	0.000363808	9.92742e-05	40	11	0.000836838	0.00422536
Collection	p__FBP	MBTA wall	0.000638227	0.00017417	40	14	0.000837526	0.00422536
Collection	f__Rhodobacteraceae	MBTA wall	0.00311246	0.000867408	40	22	0.00103526	0.00510039
Collection	g__Gordonia	MBTA wall	0.000919542	0.000258753	40	19	0.00113898	0.00551876
Collection	g__Micrococcus	MBTA wall	0.00857593	0.00251292	40	33	0.0016773	0.00778417
Collection	f__Alicyclobacillaceae	MBTA wall	3.73308e-05	1.10995e-05	40	7	0.00191851	0.00875843
Collection	c__OPB56	MBTA wall	0.000128941	3.9285e-05	40	10	0.00238769	0.010392
Collection	f__Legionellaceae	MBTA wall	8.135e-05	2.47848e-05	40	7	0.00238726	0.010392
Collection	g__Treponema	MBTA wall	0.000783732	0.000241934	40	13	0.00267726	0.0113581
Collection	g__Bulleidia	MBTA wall	0.00015778	4.87729e-05	40	11	0.00270937	0.0114653
Collection	g__Chryseobacterium	MBTA wall	0.00167253	0.000523968	40	25	0.00303754	0.0126627
Collection	f__Solirubrobacteraceae	MBTA wall	0.000341046	0.000107837	40	14	0.00328394	0.0134234
Collection	f__AK1AB1_02E	MBTA wall	0.000170186	5.38802e-05	40	7	0.00331885	0.0135332
Collection	f__Kineosporiaceae	MBTA wall	0.000343931	0.000109356	40	17	0.00343971	0.0138393
Collection	g__Sphingomonas	MBTA wall	0.00921189	0.00295111	40	39	0.00366005	0.0145364
Collection	g__Lysobacter	MBTA wall	0.00172985	0.000559797	40	16	0.00397427	0.0155636
Collection	g__Legionella	MBTA wall	0.000329677	0.000106882	40	12	0.00403345	0.0157586
Collection	f__Caulobacteraceae	MBTA wall	0.00302267	0.000985903	40	28	0.00423439	0.016316
Collection	c__PRR-11	MBTA wall	0.000478582	0.000158272	40	10	0.00472489	0.017878
Collection	g__Alicyclobacillus	MBTA wall	0.000245288	8.14412e-05	40	20	0.00487355	0.0183167
Collection	g__Opitutus	MBTA wall	7.66964e-05	2.55006e-05	40	9	0.00492701	0.0184763
Collection	g__Pedobacter	MBTA wall	0.000572797	0.000191105	40	15	0.00506062	0.0187265
Collection	g__Arthrobacter	MBTA wall	0.000553141	0.000184906	40	15	0.0051373	0.0189685
Collection	o__SC-I-84	MBTA wall	0.000346037	0.000115898	40	15	0.00521463	0.0191698
Collection	g__Dermabacter	MBTA wall	0.000138434	4.64741e-05	40	14	0.00530918	0.0194323
Collection	p__WPS-2	MBTA wall	0.000271921	9.20177e-05	40	11	0.00564215	0.0205169
Collection	c__Betaproteobacteria	MBTA wall	0.000212406	7.25749e-05	40	14	0.00606823	0.0218769
Collection	f__Syntrophobacteraceae	MBTA wall	0.000180503	6.226e-05	40	10	0.00651011	0.0231716
Collection	g__Burkholderia	MBTA wall	0.000229472	8.00575e-05	40	16	0.00707668	0.0250291
Collection	f__Gaiellaceae	MBTA wall	0.00112518	0.000400661	40	22	0.00819248	0.0280885
Collection	g__Luteimonas	MBTA wall	0.00327068	0.00116816	40	18	0.00836851	0.0285174
Collection	g__Williamsia	MBTA wall	0.000289926	0.000105469	40	16	0.00950334	0.0315526
Collection	f__[Chthoniobacteraceae]	MBTA wall	0.000469464	0.000171826	40	15	0.00990608	0.0326318
Collection	g__Candidatus Solibacter	MBTA wall	0.000112694	4.14695e-05	40	12	0.0102732	0.0335777
Collection	f__Patulibacteraceae	MBTA wall	0.000389969	0.000149728	40	18	0.0135468	0.0420757
Collection	g__Roseomonas	MBTA wall	0.000187222	7.1949e-05	40	16	0.0136245	0.0420757
Collection	g__Dyadobacter	MBTA wall	0.000452	0.000176513	40	13	0.0150563	0.045658
Collection	f__Armatimonadaceae	MBTA wall	9.48568e-05	3.79034e-05	40	10	0.0172995	0.0509406
Collection	g__Kineococcus	MBTA wall	0.000269491	0.000109137	40	15	0.018719	0.0539415
Collection	g__Streptomyces	MBTA wall	0.00880302	0.00363899	40	15	0.0210601	0.0595639
Collection	g__Lapillicoccus	MBTA wall	0.00524486	0.00217863	40	25	0.021641	0.060494
Collection	g__Exiguobacterium	MBTA wall	0.00343492	0.00149868	40	22	0.0282236	0.0751438
Collection	f__Ellin5301	MBTA wall	8.73954e-05	3.86972e-05	40	10	0.0304477	0.0795523
Collection	f__Koribacteraceae	MBTA wall	7.72167e-05	3.43851e-05	40	10	0.031337	0.0812441
Collection	g__Leuconostoc	MBTA wall	0.000692069	0.000310329	40	24	0.0324478	0.0838651
Collection	g__Fimbriimonas	MBTA wall	0.000161968	7.28921e-05	40	10	0.0330401	0.0848737
Collection	f__Methylobacteriaceae	MBTA wall	0.000789466	0.00035728	40	20	0.0339648	0.0864558
Collection	o__Ellin6067	MBTA wall	0.000225337	0.000105007	40	11	0.0391044	0.0966591
Collection	o__MIZ46	MBTA wall	0.000139372	6.49543e-05	40	12	0.0391239	0.0966591
Collection	g__Bifidobacterium	MBTA wall	0.000156558	7.36022e-05	40	18	0.0407493	0.0999827
Collection	f__Frankiaceae	MBTA wall	0.000164069	7.73193e-05	40	15	0.0412069	0.100768
Collection	f__Pseudonocardiaceae	MBTA wall	0.000289007	0.000136685	40	16	0.0418916	0.101849
Collection	g__Rubellimicrobium	MBTA wall	0.000414978	0.000196587	40	15	0.042211	0.10233
Collection	f__Hyphomicrobiaceae	MBTA wall	0.000420938	0.000199712	40	18	0.0425044	0.102893
Collection	g__Luteolibacter	MBTA wall	6.11919e-05	2.97088e-05	40	9	0.047147	0.111716
Collection	g__Bacillus	MBTA wall	-0.0313527	0.0170112	40	39	0.0740526	0.161569
Collection	f__Geodermatophilaceae	MBTA wall	0.000682296	0.000375303	40	19	0.0778868	0.168187
Collection	f__Solibacteraceae	MBTA wall	3.36173e-05	1.87244e-05	40	6	0.0814879	0.172853
Collection	g__Lampropedia	MBTA wall	0.000201307	0.000113003	40	14	0.0837786	0.175935
Collection	g__Polaromonas	MBTA wall	0.00126547	0.000736712	40	24	0.0949418	0.192869
Collection	f__Enterobacteriaceae	MBTA wall	-0.100641	0.0587005	40	39	0.0955445	0.19362
Collection	g__Brevibacterium	MBTA wall	0.00133771	0.000781098	40	22	0.0958931	0.193631
Collection	g__Flavobacterium	MBTA wall	0.000715952	0.000426272	40	20	0.10221	0.204272
Collection	o__RB41	MBTA wall	0.000409288	0.00024793	40	14	0.107984	0.211932
Collection	f__Bartonellaceae	MBTA wall	0.00137162	0.000834395	40	21	0.109425	0.214009
Collection	f__Lachnospiraceae	MBTA wall	0.000666149	0.000407916	40	22	0.111686	0.217167
Collection	g__Amaricoccus	MBTA wall	0.000694275	0.000435205	40	18	0.119903	0.230135
Collection	f__Porphyromonadaceae	MBTA wall	-0.0224095	0.0144318	40	30	0.129736	0.243798
Collection	f__UD5	MBTA wall	1.1886e-05	7.65411e-06	40	5	0.129709	0.243798
Collection	g__Alloiococcus	MBTA wall	-0.000783878	0.000504499	40	19	0.129498	0.243798
Collection	f__Paenibacillaceae	MBTA wall	0.000130473	8.45461e-05	40	16	0.132036	0.247152
PMA.treatment	f__Bacteriovoracaceae	PMA_treated	0.000129132	3.46521e-05	24	12	0.00143056	0.010227
PMA.treatment	g__Haemophilus	PMA_treated	0.00261445	0.000709975	24	19	0.00158176	0.0111303
PMA.treatment	o__iii1-15	PMA_treated	0.000284013	7.80335e-05	24	17	0.00174384	0.0119578
PMA.treatment	f__Sphingobacteriaceae	PMA_treated	0.000273342	7.96242e-05	24	17	0.00278887	0.017605
PMA.treatment	f__Phyllobacteriaceae	PMA_treated	0.00040097	0.000117699	24	14	0.00295907	0.018412
PMA.treatment	o__Gemmatimonadales	PMA_treated	0.000282668	8.38833e-05	24	15	0.00321691	0.019388
PMA.treatment	g__Zea	PMA_treated	0.000169092	5.07929e-05	24	14	0.00352674	0.0208808
PMA.treatment	o__Acidimicrobiales	PMA_treated	0.000430962	0.000134091	24	16	0.00456893	0.025586
PMA.treatment	g__Halomonas	PMA_treated	0.000452317	0.000144483	24	16	0.00550624	0.0291532
PMA.treatment	g__Nesterenkonia	PMA_treated	0.000347627	0.000111706	24	16	0.00573976	0.0296701
PMA.treatment	g__Chryseobacterium	PMA_treated	0.000907965	0.000295123	24	20	0.00621106	0.0314142
PMA.treatment	g__Spirosoma	PMA_treated	0.000140407	4.56443e-05	24	15	0.0062174	0.0314142
PMA.treatment	g__Agrobacterium	PMA_treated	0.000335612	0.000111378	24	14	0.00714855	0.0346846
PMA.treatment	g__Virgibacillus	PMA_treated	-0.00334702	0.00111951	24	24	0.00753127	0.0358812
PMA.treatment	o__Sphingomonadales	PMA_treated	0.000387434	0.000133377	24	17	0.00908243	0.0413789
PMA.treatment	g__Propionivibrio	PMA_treated	5.98978e-05	2.13643e-05	24	15	0.0113335	0.0489135
PMA.treatment	g__Campylobacter	PMA_treated	0.000150505	5.39662e-05	24	14	0.0117036	0.0500945
PMA.treatment	g__WAL_1855D	PMA_treated	0.000217517	7.81861e-05	24	16	0.0118789	0.0503634
PMA.treatment	g__Pedobacter	PMA_treated	0.000397446	0.000144268	24	15	0.0125998	0.0524291
PMA.treatment	g__Lactobacillus	PMA_treated	0.00514967	0.00187765	24	21	0.0129404	0.0535135
PMA.treatment	g__Finegoldia	PMA_treated	0.00118748	0.000433565	24	19	0.0130458	0.0537841
PMA.treatment	g__Micrococcus	PMA_treated	0.00476024	0.00174929	24	22	0.013553	0.0555342
PMA.treatment	g__Bdellovibrio	PMA_treated	0.000105147	3.8735e-05	24	10	0.0137516	0.055669
PMA.treatment	g__Peptoniphilus	PMA_treated	0.000963603	0.000374405	24	19	0.018599	0.0712167
PMA.treatment	g__Novosphingobium	PMA_treated	0.000451719	0.000178698	24	16	0.0204996	0.0769593
PMA.treatment	o__Sphingobacteriales	PMA_treated	0.000125799	5.01558e-05	24	14	0.0213694	0.0791198
PMA.treatment	f__Nocardioidaceae	PMA_treated	0.000878615	0.00035103	24	22	0.0216048	0.0796212
PMA.treatment	f__Sinobacteraceae	PMA_treated	0.000194515	7.78306e-05	24	12	0.0217769	0.0797497
PMA.treatment	g__Luteolibacter	PMA_treated	5.48691e-05	2.24276e-05	24	9	0.0243265	0.0867236
PMA.treatment	g__Nocardioides	PMA_treated	0.000113725	4.66411e-05	24	16	0.0247477	0.0875286
PMA.treatment	f__Xanthomonadaceae	PMA_treated	0.000730605	0.000304859	24	22	0.0269988	0.0943782
PMA.treatment	g__Terracoccus	PMA_treated	0.000184568	7.72505e-05	24	18	0.0274129	0.0952013
PMA.treatment	g__Gemmatimonas	PMA_treated	2.71905e-05	1.14069e-05	24	5	0.0277292	0.0958047
PMA.treatment	g__Truepera	PMA_treated	0.000198728	8.34345e-05	24	13	0.027835	0.0959236
PMA.treatment	g__Jeotgalicoccus	PMA_treated	0.000886335	0.000373471	24	18	0.0283365	0.096416
PMA.treatment	f__Porphyromonadaceae	PMA_treated	-0.0256016	0.0108591	24	19	0.0292672	0.098832
PMA.treatment	f__Thermoactinomycetaceae	PMA_treated	-9.5308e-05	4.04736e-05	24	11	0.0294373	0.0991573
PMA.treatment	g__Microbacterium	PMA_treated	0.000183924	7.91716e-05	24	16	0.0314263	0.103776
PMA.treatment	g__Peptococcus	PMA_treated	4.15424e-05	1.79625e-05	24	7	0.0321038	0.105754
PMA.treatment	g__Fimbriimonas	PMA_treated	0.000126601	5.50273e-05	24	10	0.0329063	0.107758
PMA.treatment	g__Propionibacterium	PMA_treated	0.000112084	4.88018e-05	24	17	0.033175	0.107758
PMA.treatment	f__Enterobacteriaceae	PMA_treated	-0.0344837	0.0151285	24	24	0.0343714	0.110515
PMA.treatment	f__Conexibacteraceae	PMA_treated	8.91235e-05	3.96903e-05	24	12	0.0368306	0.116633
PMA.treatment	g__Nelumbo	PMA_treated	0.0015875	0.000707195	24	18	0.0368819	0.116633
PMA.treatment	f__Bacillaceae	PMA_treated	-0.00437813	0.00198522	24	24	0.0399472	0.12314
PMA.treatment	g__Leuconostoc	PMA_treated	0.000511094	0.000232141	24	18	0.0402463	0.123495
PMA.treatment	f__Micrococcaceae	PMA_treated	0.000879417	0.000400078	24	21	0.0405352	0.124099
PMA.treatment	f__Caulobacteraceae	PMA_treated	0.000922187	0.000421273	24	21	0.0412819	0.125811
PMA.treatment	g__Wautersiella	PMA_treated	0.00031568	0.000144676	24	16	0.0418726	0.126749
PMA.treatment	g__Brachybacterium	PMA_treated	0.000981288	0.000450993	24	21	0.0423927	0.127463
PMA.treatment	g__Veillonella	PMA_treated	0.00118987	0.000549142	24	23	0.0431697	0.128648
PMA.treatment	g__Gardnerella	PMA_treated	0.000932229	0.000433835	24	18	0.0447511	0.132191
PMA.treatment	f__Acidobacteriaceae	PMA_treated	0.000137319	6.4453e-05	24	15	0.046413	0.135607
PMA.treatment	g__Flavisolibacter	PMA_treated	0.000560774	0.000263618	24	17	0.0467194	0.136206
PMA.treatment	o__N1423WL	PMA_treated	3.23094e-05	1.52079e-05	24	5	0.0469726	0.136648
PMA.treatment	g__Kineococcus	PMA_treated	0.000173854	8.23892e-05	24	15	0.0483316	0.139694
PMA.treatment	f__Moraxellaceae	PMA_treated	0.000641621	0.000304648	24	17	0.0487211	0.140217
PMA.treatment	o__WD2101	PMA_treated	0.000123121	5.8791e-05	24	13	0.0498831	0.142948
PMA.treatment	o__Sva0725	PMA_treated	0.000200464	9.5781e-05	24	15	0.0500082	0.143002
PMA.treatment	g__Bifidobacterium	PMA_treated	0.000114837	5.49052e-05	24	13	0.0501452	0.143089
PMA.treatment	g__Anaerococcus	PMA_treated	0.00145121	0.000694974	24	21	0.0504838	0.14375
PMA.treatment	g__Cellulomonas	PMA_treated	0.000206039	9.97848e-05	24	17	0.0528594	0.149564
PMA.treatment	o__SC-I-84	PMA_treated	8.11271e-05	3.93293e-05	24	14	0.053075	0.149859
PMA.treatment	f__Kineosporiaceae	PMA_treated	0.000168843	8.25541e-05	24	16	0.054932	0.15381
PMA.treatment	g__Psychrobacter	PMA_treated	0.000591249	0.000290667	24	14	0.0561428	0.156811
PMA.treatment	g__Lampropedia	PMA_treated	0.000133503	6.57018e-05	24	13	0.0563803	0.156884
PMA.treatment	g__Deinococcus	PMA_treated	0.00110467	0.000544544	24	22	0.0567499	0.157261
PMA.treatment	g__Actinoplanes	PMA_treated	3.02757e-05	1.50267e-05	24	10	0.0582997	0.159598
PMA.treatment	g__Brevibacterium	PMA_treated	0.00117657	0.000583981	24	18	0.0583056	0.159598
PMA.treatment	g__Rhodoplanes	PMA_treated	0.000325837	0.000163201	24	16	0.0604074	0.163355
PMA.treatment	g__Candidatus Solibacter	PMA_treated	6.204e-05	3.12928e-05	24	10	0.0620653	0.165836
PMA.treatment	g__Faecalibacterium	PMA_treated	0.000232765	0.000117365	24	18	0.0619826	0.165836
PMA.treatment	g__Flavobacterium	PMA_treated	0.000638828	0.000321799	24	20	0.0617518	0.165836
PMA.treatment	o__Solibacterales	PMA_treated	0.00011225	5.65619e-05	24	13	0.0618275	0.165836
PMA.treatment	f__Bradyrhizobiaceae	PMA_treated	-0.00290479	0.00147412	24	23	0.063527	0.167741
PMA.treatment	g__Sphingobacterium	PMA_treated	0.00104713	0.000534337	24	18	0.06487	0.170284
PMA.treatment	g__Candidatus Protochlamydia	PMA_treated	-6.32758e-05	3.25831e-05	24	9	0.0671145	0.174135
PMA.treatment	g__Paracoccus	PMA_treated	0.00169135	0.000870392	24	22	0.0669573	0.174135
PMA.treatment	g__Rubellimicrobium	PMA_treated	0.000286016	0.000148406	24	15	0.0690356	0.177747
PMA.treatment	f__[Mogibacteriaceae]	PMA_treated	0.000207455	0.00010851	24	15	0.0710952	0.180969
PMA.treatment	p__FBP	PMA_treated	0.000249832	0.000131484	24	14	0.0727053	0.18287
PMA.treatment	f__Rhodobacteraceae	PMA_treated	0.00121611	0.000646091	24	18	0.0752092	0.186841
PMA.treatment	g__Pilimelia	PMA_treated	-7.88226e-05	4.18609e-05	24	11	0.0751079	0.186841
PMA.treatment	f__mb2424	PMA_treated	9.42719e-05	5.02326e-05	24	10	0.0760029	0.18822
PMA.treatment	g__Iamia	PMA_treated	6.74222e-05	3.59511e-05	24	8	0.0761931	0.18822
PMA.treatment	g__Kingella	PMA_treated	8.08412e-05	4.35028e-05	24	12	0.0786908	0.191595
PMA.treatment	c__Gitt-GS-136	PMA_treated	6.81594e-05	3.67497e-05	24	13	0.0792265	0.192333
PMA.treatment	f__Comamonadaceae	PMA_treated	-0.00413114	0.00226882	24	24	0.0844194	0.20117
PMA.treatment	g__Acinetobacter	PMA_treated	0.0063514	0.00349852	24	24	0.0852711	0.201863
PMA.treatment	f__[Weeksellaceae]	PMA_treated	0.000799768	0.000441994	24	23	0.0862304	0.203322
PMA.treatment	f__Chitinophagaceae	PMA_treated	0.000848238	0.000472301	24	21	0.0884195	0.206264
PMA.treatment	g__Blautia	PMA_treated	0.000310456	0.000172888	24	17	0.0884631	0.206264
PMA.treatment	o__Solirubrobacterales	PMA_treated	0.000476941	0.000265681	24	19	0.0885522	0.206264
PMA.treatment	g__Modestobacter	PMA_treated	0.00165574	0.000927692	24	20	0.0902709	0.208461
PMA.treatment	g__Prauserella	PMA_treated	9.79031e-05	5.48399e-05	24	10	0.0901939	0.208461
PMA.treatment	g__Exiguobacterium	PMA_treated	0.00198101	0.00111549	24	18	0.0917662	0.21013
PMA.treatment	o__OPB54	PMA_treated	-7.438e-05	4.21259e-05	24	8	0.0935189	0.213757
PMA.treatment	g__Sporosarcina	PMA_treated	-0.000364498	0.000206834	24	17	0.0941037	0.214365
PMA.treatment	g__Leptotrichia	PMA_treated	0.000757384	0.000432345	24	19	0.0959331	0.217427
PMA.treatment	o__Streptophyta	PMA_treated	0.0123589	0.00705978	24	23	0.0961434	0.217537
PMA.treatment	f__Patulibacteraceae	PMA_treated	0.00013646	7.88265e-05	24	16	0.0996322	0.225052
PMA.treatment	g__Sediminibacterium	PMA_treated	3.23848e-05	1.87332e-05	24	8	0.100072	0.225667
PMA.treatment	g__Capnocytophaga	PMA_treated	0.000129177	7.48123e-05	24	12	0.100449	0.226137
PMA.treatment	g__Bradyrhizobium	PMA_treated	-0.00104359	0.000612496	24	24	0.104714	0.234431
PMA.treatment	f__Hyphomicrobiaceae	PMA_treated	0.00025639	0.000150763	24	15	0.105326	0.234757
PMA.treatment	g__Tannerella	PMA_treated	6.29703e-05	3.70114e-05	24	9	0.105181	0.234757
PMA.treatment	g__Mycobacterium	PMA_treated	-0.000517793	0.000305924	24	18	0.106874	0.23742
PMA.treatment	f__C111	PMA_treated	9.68811e-05	5.81931e-05	24	14	0.112353	0.245931
PMA.treatment	g__Peredibacter	PMA_treated	6.79502e-05	4.09551e-05	24	11	0.113504	0.246151
PMA.treatment	g__Cellvibrio	PMA_treated	0.000293049	0.000177572	24	14	0.115313	0.248766

## Sheet: Source_PMA
feature	Sample	PMA	coef	stderr	N	N.not.0	pval	qval
o__Acidimicrobiales	MBTA touchscreen	No	0.00801719	0.000420328	24	16	1.98554e-12	4.66998e-09
o__Acidimicrobiales	MBTA touchscreen	Yes	0.00643611	0.000420328	24	16	5.60845e-11	6.59554e-08
f__Phyllobacteriaceae	MBTA touchscreen	No	0.00517361	0.000355046	24	14	1.17893e-10	9.2428e-08
g__Balneimonas	MBTA touchscreen	Yes	0.00608753	0.000438785	24	12	2.44874e-10	1.43986e-07
o__Sphingomonadales	MBTA touchscreen	No	0.00530753	0.00039052	24	17	3.32213e-10	1.56273e-07
g__Iamia	MBTA touchscreen	No	0.00144077	0.000110191	24	8	5.87812e-10	2.30422e-07
g__Adhaeribacter	MBTA touchscreen	Yes	0.00272438	0.000219221	24	11	1.23691e-09	4.15601e-07
c__Gitt-GS-136	MBTA touchscreen	No	0.00165508	0.000147842	24	13	5.58891e-09	1.46057e-06
g__Planctomyces	MBTA touchscreen	No	0.00153441	0.000136808	24	11	5.44208e-09	1.46057e-06
o__iii1-15	MBTA touchscreen	No	0.00243529	0.000221959	24	17	7.44697e-09	1.75153e-06
f__Nocardioidaceae	MBTA touchscreen	Yes	0.0100443	0.000933655	24	22	9.84588e-09	2.10523e-06
f__Nocardioidaceae	MBTA touchscreen	No	0.00995624	0.000933655	24	22	1.11528e-08	2.18595e-06
f__Sphingomonadaceae	MBTA touchscreen	Yes	0.0165256	0.0015809	24	21	1.47722e-08	2.48174e-06
g__Halomonas	MBTA touchscreen	No	0.00501613	0.000479112	24	16	1.44508e-08	2.48174e-06
g__Luteimicrobium	MBTA touchscreen	Yes	0.0046014	0.000446271	24	15	1.79135e-08	2.80884e-06
f__Sphingomonadaceae	MBTA touchscreen	No	0.0160195	0.0015809	24	21	2.28437e-08	3.35802e-06
o__Sphingomonadales	MBTA touchscreen	Yes	0.00392287	0.00039052	24	17	2.57948e-08	3.56879e-06
o__Sva0725	MBTA touchscreen	No	0.00247486	0.000252588	24	15	3.64598e-08	4.76408e-06
o__Solirubrobacterales	MBTA touchscreen	Yes	0.00981576	0.00100713	24	19	3.92317e-08	4.85647e-06
g__Luteimicrobium	MBTA touchscreen	No	0.00433	0.000446271	24	15	4.17384e-08	4.90844e-06
c__Gemmatimonadetes	MBTA touchscreen	Yes	0.00117272	0.000123954	24	8	5.90512e-08	6.31311e-06
o__Solirubrobacterales	MBTA touchscreen	No	0.00954087	0.00100713	24	19	5.80033e-08	6.31311e-06
c__Gitt-GS-136	MBTA touchscreen	Yes	0.0013808	0.000147842	24	13	7.04448e-08	6.44588e-06
f__Micrococcaceae	MBTA wall	No	0.00731961	0.000786539	24	21	7.3996e-08	6.44588e-06
g__Adhaeribacter	MBTA touchscreen	No	0.00204452	0.000219221	24	11	7.18396e-08	6.44588e-06
g__Planctomyces	MBTA touchscreen	Yes	0.00128075	0.000136808	24	11	6.82162e-08	6.44588e-06
g__Skermanella	MBTA touchscreen	Yes	0.00745934	0.000799112	24	14	7.09783e-08	6.44588e-06
f__Ellin6075	MBTA touchscreen	No	0.0081657	0.000889451	24	18	8.902e-08	7.47768e-06
f__Phyllobacteriaceae	MBTA touchscreen	Yes	0.00319955	0.000355046	24	14	1.14494e-07	8.97636e-06
g__Agrobacterium	MBTA touchscreen	No	0.00362402	0.000402083	24	14	1.14246e-07	8.97636e-06
g__Pseudonocardia	MBTA touchscreen	Yes	0.00661282	0.000751454	24	20	1.57649e-07	1.1961e-05
f__Ellin6075	MBTA touchscreen	Yes	0.00777287	0.000889451	24	18	1.73067e-07	1.27204e-05
c__Gemmatimonadetes	MBTA touchscreen	No	0.00104181	0.000123954	24	8	2.90579e-07	2.04896e-05
o__Solibacterales	MBTA touchscreen	No	0.00161778	0.000192761	24	13	2.96193e-07	2.04896e-05
g__Iamia	MBTA touchscreen	Yes	0.000920006	0.000110191	24	8	3.17179e-07	2.13144e-05
f__A4b	MBTA touchscreen	No	0.000836127	0.000101007	24	8	3.55061e-07	2.31973e-05
f__A4b	MBTA touchscreen	Yes	0.000828207	0.000101007	24	8	4.02259e-07	2.55706e-05
o__JG30-KF-CM45	MBTA touchscreen	No	0.00353494	0.00043711	24	15	4.81748e-07	2.98176e-05
o__Solibacterales	MBTA touchscreen	Yes	0.00155486	0.000192761	24	13	4.98187e-07	3.00445e-05
f__Nakamurellaceae	MBTA touchscreen	Yes	0.00263797	0.000331038	24	16	5.83379e-07	3.43027e-05
g__Balneimonas	MBTA touchscreen	No	0.00345616	0.000438785	24	12	6.77997e-07	3.79678e-05
g__Pseudonocardia	MBTA touchscreen	No	0.0059226	0.000751454	24	20	6.72615e-07	3.79678e-05
f__Nakamurellaceae	MBTA touchscreen	No	0.00258551	0.000331038	24	16	7.56004e-07	4.13517e-05
f__Gaiellaceae	MBTA touchscreen	Yes	0.00161434	0.000211828	24	18	1.03484e-06	5.5317e-05
f__Bacteriovoracaceae	MBTA touchscreen	No	0.000828975	0.000109602	24	12	1.13943e-06	5.95542e-05
g__[Prevotella]	MBTA seat	Yes	-0.00461961	0.00061512	24	18	1.24646e-06	6.37322e-05
g__[Prevotella]	MBTA wall	Yes	-0.0045913	0.00061512	24	18	1.34717e-06	6.74159e-05
g__[Prevotella]	MBTA seat	No	-0.00457923	0.00061512	24	18	1.39266e-06	6.82402e-05
o__JG30-KF-CM45	MBTA touchscreen	Yes	0.00324095	0.00043711	24	15	1.46525e-06	7.0332e-05
f__Pirellulaceae	MBTA touchscreen	Yes	0.00183944	0.000249468	24	11	1.57125e-06	7.39115e-05
o__Gemmatimonadales	MBTA touchscreen	No	0.00151984	0.000206788	24	15	1.63594e-06	7.54458e-05
g__Blastococcus	MBTA touchscreen	Yes	0.0133075	0.00181472	24	21	1.68322e-06	7.61335e-05
f__Moraxellaceae	MBTA touchscreen	No	0.00646479	0.000883619	24	17	1.73228e-06	7.68739e-05
g__Nesterenkonia	MBTA touchscreen	No	0.00338561	0.000463553	24	16	1.7702e-06	7.71022e-05
g__Actinoplanes	MBTA touchscreen	No	0.000395661	5.4358e-05	24	10	1.84713e-06	7.89898e-05
g__Candidatus Nitrososphaera	MBTA touchscreen	Yes	0.00344074	0.000491805	24	13	3.01613e-06	0.000126678
g__Skermanella	MBTA touchscreen	No	0.00543742	0.000799112	24	14	4.23309e-06	0.000174671
g__Erythrobacter	MBTA touchscreen	No	0.00590617	0.000872802	24	13	4.52516e-06	0.000183223
g__Erythrobacter	MBTA touchscreen	Yes	0.00589856	0.000872802	24	13	4.59616e-06	0.000183223
f__Rhodospirillaceae	MBTA touchscreen	No	0.00271235	0.000410515	24	19	6.02863e-06	0.000236322
g__Actinomycetospora	MBTA touchscreen	No	0.00347777	0.000528365	24	17	6.30812e-06	0.000239302
o__Gemmatimonadales	MBTA wall	No	0.00136225	0.000206788	24	15	6.24521e-06	0.000239302
f__EB1017	MBTA touchscreen	Yes	0.000241209	3.68181e-05	24	10	6.66964e-06	0.000249
g__Terracoccus	MBTA touchscreen	No	0.00207334	0.000322714	24	18	8.40289e-06	0.000308806
f__Gemmataceae	MBTA touchscreen	No	0.000486234	7.58575e-05	24	8	8.63501e-06	0.000312455
g__[Prevotella]	MBTA wall	No	-0.00389438	0.00061512	24	18	9.98068e-06	0.000355675
g__Afifella	MBTA touchscreen	Yes	0.000863218	0.000137919	24	7	1.14071e-05	0.000400442
f__EB1017	MBTA touchscreen	No	0.000229221	3.68181e-05	24	10	1.21302e-05	0.000419564
f__Pirellulaceae	MBTA touchscreen	No	0.00154294	0.000249468	24	11	1.30897e-05	0.000446187
g__[Prevotella]	MBTA touchscreen	Yes	-0.00379135	0.00061512	24	18	1.36208e-05	0.000457659
f__Moraxellaceae	MBTA touchscreen	Yes	0.00542782	0.000883619	24	17	1.41627e-05	0.000460645
g__Haemophilus	MBTA seat	Yes	-0.0172204	0.0028057	24	19	1.42972e-05	0.000460645
g__Haemophilus	MBTA wall	Yes	-0.0172235	0.0028057	24	19	1.42683e-05	0.000460645
f__Hyphomonadaceae	MBTA touchscreen	Yes	0.00113785	0.000185612	24	8	1.44964e-05	0.000460751
g__Blastococcus	MBTA touchscreen	No	0.0108549	0.00181472	24	21	1.91794e-05	0.000601465
g__Mycobacterium	MBTA touchscreen	Yes	0.00632526	0.0010645	24	18	2.06732e-05	0.000639782
c__Gemm-1	MBTA touchscreen	Yes	0.000598612	0.000101028	24	10	2.13416e-05	0.00065189
c__Gemm-3	MBTA touchscreen	Yes	0.00427639	0.000722878	24	13	2.17281e-05	0.000655187
g__Dietzia	MBTA touchscreen	Yes	0.0085534	0.00144854	24	16	2.21843e-05	0.000660473
g__Halomonas	MBTA touchscreen	Yes	0.002807	0.000479112	24	16	2.4222e-05	0.000708985
g__Nesterenkonia	MBTA touchscreen	Yes	0.0027139	0.000463553	24	16	2.44166e-05	0.000708985
g__Bdellovibrio	MBTA touchscreen	No	0.0008065	0.000138624	24	10	2.61896e-05	0.000751195
g__[Prevotella]	MBTA touchscreen	No	-0.00356763	0.00061512	24	18	2.71084e-05	0.000768179
o__iii1-15	MBTA touchscreen	Yes	0.00126066	0.000221959	24	17	3.4167e-05	0.000956676
g__Devosia	MBTA touchscreen	No	0.00587295	0.00103984	24	17	3.63326e-05	0.000993654
g__Propionibacterium	MBTA seat	Yes	-0.00113698	0.000201218	24	17	3.61533e-05	0.000993654
g__Haemophilus	MBTA touchscreen	Yes	-0.0157894	0.0028057	24	19	3.77892e-05	0.00102161
f__Isosphaeraceae	MBTA touchscreen	Yes	0.0012381	0.000222935	24	15	4.36348e-05	0.00116624
f__Gaiellaceae	MBTA touchscreen	No	0.00116731	0.000211828	24	18	4.74583e-05	0.00125418
f__Micrococcaceae	MBTA touchscreen	Yes	0.00432254	0.000786539	24	21	4.8869e-05	0.00127711
g__Deinococcus	MBTA touchscreen	No	0.0114912	0.00209319	24	22	4.94327e-05	0.00127765
f__Erythrobacteraceae	MBTA touchscreen	No	0.00230773	0.000425394	24	13	5.61394e-05	0.00141978
g__Devosia	MBTA touchscreen	Yes	0.00564676	0.00103984	24	17	5.55394e-05	0.00141978
g__Steroidobacter	MBTA touchscreen	No	0.0002229	4.12298e-05	24	9	5.82378e-05	0.00145718
f__Coriobacteriaceae	MBTA wall	Yes	0.00186058	0.000345309	24	15	6.03539e-05	0.00149424
f__Moraxellaceae	MBTA wall	No	0.00474834	0.000883619	24	17	6.20927e-05	0.00152127
f__Rhodospirillaceae	MBTA touchscreen	Yes	0.00218495	0.000410515	24	19	6.87101e-05	0.00166604
f__Thermoactinomycetaceae	MBTA touchscreen	Yes	0.000702335	0.000132732	24	11	7.30718e-05	0.00171865
g__Haemophilus	MBTA seat	No	-0.0148586	0.0028057	24	19	7.24269e-05	0.00171865
g__Propionibacterium	MBTA touchscreen	Yes	-0.00106525	0.000201218	24	17	7.26931e-05	0.00171865
g__Agrobacterium	MBTA touchscreen	Yes	0.00210563	0.000402083	24	14	8.14391e-05	0.00189648
g__Propionibacterium	MBTA wall	Yes	-0.00105274	0.000201218	24	17	8.22469e-05	0.00189652
g__Cellulomonas	MBTA wall	No	0.00151055	0.000289623	24	17	8.49565e-05	0.00192132
o__Rhizobiales	MBTA touchscreen	Yes	0.00423322	0.000811591	24	18	8.48897e-05	0.00192132
f__C111	MBTA touchscreen	No	0.00115212	0.000221535	24	14	8.75195e-05	0.00194194
g__Afifella	MBTA touchscreen	No	0.000717818	0.000137919	24	7	8.68237e-05	0.00194194
g__Actinomycetospora	MBTA touchscreen	Yes	0.0027436	0.000528365	24	17	8.89292e-05	0.00194674
g__Kaistobacter	MBTA touchscreen	No	0.00487774	0.00093983	24	18	8.93913e-05	0.00194674
g__Gemmatimonas	MBTA touchscreen	No	0.000188461	3.6466e-05	24	5	9.33853e-05	0.00201507
g__Deinococcus	MBTA touchscreen	Yes	0.0107859	0.00209319	24	22	9.62755e-05	0.00205855
g__Terracoccus	MBTA touchscreen	Yes	0.00166139	0.000322714	24	18	9.71825e-05	0.00205922
g__Kaistobacter	MBTA touchscreen	Yes	0.00481317	0.00093983	24	18	0.000102549	0.00215353
f__Erythrobacteraceae	MBTA touchscreen	Yes	0.00216235	0.000425394	24	13	0.000110699	0.00229634
f__Nocardioidaceae	MBTA wall	No	0.00473935	0.000933655	24	22	0.000112279	0.00229634
g__Candidatus Protochlamydia	MBTA touchscreen	Yes	0.00054358	0.000107055	24	9	0.000111949	0.00229634
g__Lysobacter	MBTA touchscreen	No	0.00285381	0.000566101	24	15	0.000120454	0.00244231
o__Rhizobiales	MBTA touchscreen	No	0.00404988	0.000811591	24	18	0.000133521	0.00268412
f__Streptomycetaceae	MBTA touchscreen	Yes	0.000467943	9.45508e-05	24	12	0.000145032	0.0028908
g__Propionibacterium	MBTA seat	No	-0.000989067	0.000201218	24	17	0.000155278	0.00306902
f__Hyphomonadaceae	MBTA touchscreen	No	0.000911349	0.000185612	24	8	0.000156996	0.00307712
g__Anaerococcus	MBTA wall	Yes	-0.0130415	0.00266212	24	21	0.000160557	0.00312091
f__Gaiellaceae	MBTA wall	No	0.00102693	0.000211828	24	18	0.000178071	0.00343298
g__Modestobacter	MBTA wall	No	0.0132232	0.00273719	24	20	0.000184332	0.00352479
f__Conexibacteraceae	MBTA touchscreen	No	0.000681654	0.000141953	24	12	0.000195538	0.00359499
f__Enterobacteriaceae	MBTA seat	Yes	0.244804	0.051183	24	24	0.000203288	0.00359499
g__Dietzia	MBTA touchscreen	No	0.00696768	0.00144854	24	16	0.000192305	0.00359499
g__Peptococcus	MBTA seat	No	-0.000303809	6.34713e-05	24	7	0.000201781	0.00359499
g__Peptococcus	MBTA seat	Yes	-0.000303809	6.34713e-05	24	7	0.000201781	0.00359499
g__Peptococcus	MBTA touchscreen	Yes	-0.000303809	6.34713e-05	24	7	0.000201781	0.00359499
g__Peptococcus	MBTA wall	No	-0.000303809	6.34713e-05	24	7	0.000201781	0.00359499
g__Peptococcus	MBTA wall	Yes	-0.000303809	6.34713e-05	24	7	0.000201781	0.00359499
g__Veillonella	MBTA seat	Yes	-0.0112591	0.0023504	24	23	0.000200251	0.00359499
g__Veillonella	MBTA wall	Yes	-0.0112915	0.0023504	24	23	0.00019471	0.00359499
f__Micrococcaceae	MBTA touchscreen	No	0.00374963	0.000786539	24	21	0.000209892	0.00368407
g__Microbacterium	MBTA wall	No	0.00111588	0.000234463	24	16	0.000213333	0.00371674
f__Gemmataceae	MBTA touchscreen	Yes	0.000360727	7.58575e-05	24	8	0.000215069	0.00371943
g__Steroidobacter	MBTA touchscreen	Yes	0.000193991	4.12298e-05	24	9	0.000238345	0.00409188
g__Propionibacterium	MBTA touchscreen	No	-0.000938423	0.000201218	24	17	0.000259458	0.00442207
g__Luteimicrobium	MBTA wall	No	0.00205894	0.000446271	24	15	0.000287569	0.00486592
c__Gemm-3	MBTA touchscreen	No	0.00333131	0.000722878	24	13	0.000290693	0.00488364
g__Haemophilus	MBTA touchscreen	No	-0.0128559	0.0028057	24	19	0.000306899	0.00511933
o__Gemmatimonadales	MBTA touchscreen	Yes	0.000942746	0.000206788	24	15	0.000321835	0.00533067
c__Alphaproteobacteria	MBTA touchscreen	Yes	0.00118652	0.000261069	24	17	0.000331383	0.00545044
g__Pedobacter	MBTA wall	No	0.0018609	0.00041177	24	15	0.000349346	0.00570598
f__Sphingomonadaceae	MBTA wall	No	0.0071059	0.0015809	24	21	0.000367434	0.00596004
g__Asticcacaulis	MBTA touchscreen	Yes	0.000209464	4.6752e-05	24	7	0.000378649	0.006082
g__Blastococcus	MBTA wall	No	0.00812711	0.00181472	24	21	0.000380125	0.006082
g__Propionibacterium	MBTA wall	No	-0.000893155	0.000201218	24	17	0.0004127	0.00655858
f__Intrasporangiaceae	MBTA touchscreen	Yes	0.00925663	0.00208975	24	21	0.000420658	0.00659592
g__Flavisolibacter	MBTA touchscreen	No	0.00412585	0.000931201	24	17	0.00041966	0.00659592
g__Nelumbo	MBTA wall	No	0.00929351	0.00210448	24	18	0.000432575	0.00673786
g__Asticcacaulis	MBTA touchscreen	No	0.000206274	4.6752e-05	24	7	0.000436168	0.00674912
f__Isosphaeraceae	MBTA touchscreen	No	0.000981599	0.000222935	24	15	0.000444388	0.00683138
g__Rubellimicrobium	MBTA wall	No	0.00199808	0.000456894	24	15	0.000472868	0.00722199
g__Brachybacterium	MBTA touchscreen	No	0.00800374	0.0018354	24	21	0.000485231	0.00736299
f__Microbacteriaceae	MBTA touchscreen	No	0.00346526	0.000795844	24	23	0.000491904	0.00739335
g__Hymenobacter	MBTA wall	No	0.0140935	0.00323794	24	23	0.000493519	0.00739335
g__Campylobacter	MBTA seat	Yes	-0.00086114	0.000198127	24	14	0.000499945	0.00739541
g__Campylobacter	MBTA wall	Yes	-0.00086114	0.000198127	24	14	0.000499945	0.00739541
g__Microbacterium	MBTA touchscreen	No	0.00101457	0.000234463	24	16	0.000520328	0.00764882
g__Cellvibrio	MBTA touchscreen	No	0.00290086	0.000672149	24	14	0.000532834	0.00778401
o__Streptophyta	MBTA wall	No	0.0999432	0.023174	24	23	0.000536258	0.00778568
g__Pedomicrobium	MBTA touchscreen	No	0.000313895	7.29719e-05	24	9	0.00054885	0.0079196
g__Candidatus Nitrososphaera	MBTA touchscreen	No	0.00211158	0.000491805	24	13	0.000558128	0.00800438
g__Arsenicicoccus	MBTA touchscreen	Yes	0.00184293	0.000429902	24	15	0.000565954	0.00806742
g__Campylobacter	MBTA seat	No	-0.00084573	0.000198127	24	14	0.000587894	0.00832968
g__Actinoplanes	MBTA touchscreen	Yes	0.000230743	5.4358e-05	24	10	0.000617774	0.00870063
g__Anaerococcus	MBTA seat	No	-0.011251	0.00266212	24	21	0.000642166	0.00899033
g__Shinella	MBTA touchscreen	No	0.00153441	0.000367868	24	13	0.000720804	0.0100315
g__Gemmata	MBTA touchscreen	No	0.000954988	0.000229579	24	12	0.00073812	0.0102121
g__Alloiococcus	MBTA seat	Yes	-0.00483105	0.00116315	24	15	0.000747974	0.0102281
g__Alloiococcus	MBTA wall	Yes	-0.00483105	0.00116315	24	15	0.000747974	0.0102281
f__Sporichthyaceae	MBTA wall	No	0.00173373	0.000417871	24	16	0.000754962	0.010264
f__Intrasporangiaceae	MBTA touchscreen	No	0.00862269	0.00208975	24	21	0.000791884	0.0106433
g__Frigoribacterium	MBTA wall	No	0.00133183	0.000322777	24	11	0.000791916	0.0106433
g__Alloiococcus	MBTA seat	No	-0.00477092	0.00116315	24	15	0.000833562	0.0111394
o__Sphingomonadales	MBTA wall	No	0.00159623	0.00039052	24	17	0.000858885	0.011413
g__Cellulomonas	MBTA touchscreen	Yes	0.00118072	0.000289623	24	17	0.000878405	0.0116068
g__Veillonella	MBTA touchscreen	Yes	-0.00948929	0.0023504	24	23	0.000954202	0.0125379
g__Anaerococcus	MBTA touchscreen	Yes	-0.0107351	0.00266212	24	21	0.000963832	0.0125941
f__Isosphaeraceae	MBTA wall	No	0.000897281	0.000222935	24	15	0.000979483	0.0127279
f__Sinobacteraceae	MBTA touchscreen	No	0.00118425	0.000295398	24	12	0.00101267	0.0130868
g__Sphingomonas	MBTA wall	No	0.0206523	0.00516099	24	24	0.00102855	0.0132194
g__Erythromicrobium	MBTA touchscreen	Yes	0.000597927	0.000150148	24	12	0.00107127	0.0136936
f__C111	MBTA touchscreen	Yes	0.000879771	0.000221535	24	14	0.00109634	0.0138491
f__Cytophagaceae	MBTA touchscreen	No	0.00353473	0.000890539	24	17	0.00110109	0.0138491
g__Cellulomonas	MBTA touchscreen	No	0.00114968	0.000289623	24	17	0.00110024	0.0138491
g__Alloiococcus	MBTA touchscreen	No	-0.00457005	0.00116315	24	15	0.00119825	0.0149909
o__Acidimicrobiales	MBTA wall	No	0.00164582	0.000420328	24	16	0.00123272	0.0153405
g__Lysobacter	MBTA touchscreen	Yes	0.00219114	0.000566101	24	15	0.00135525	0.0166887
g__Pedomicrobium	MBTA touchscreen	Yes	0.000282623	7.29719e-05	24	9	0.00134825	0.0166887
o__N1423WL	MBTA touchscreen	No	0.000216342	5.60118e-05	24	5	0.00137869	0.016889
g__Aquicella	MBTA touchscreen	No	0.000502879	0.000130289	24	6	0.00138658	0.0168976
g__Paracoccus	MBTA touchscreen	Yes	0.01074	0.00279483	24	22	0.00143694	0.0174211
g__Shinella	MBTA touchscreen	Yes	0.00140211	0.000367868	24	13	0.00153523	0.0185172
f__Sphingobacteriaceae	MBTA touchscreen	No	0.001142	0.000300866	24	17	0.00158705	0.0189328
g__Burkholderia	MBTA seat	Yes	-0.000431158	0.000113652	24	14	0.00159383	0.0189328
g__Burkholderia	MBTA wall	Yes	-0.000431158	0.000113652	24	14	0.00159383	0.0189328
p__FBP	MBTA wall	No	0.00163039	0.000431038	24	14	0.00163197	0.0192885
g__Anaerococcus	MBTA seat	Yes	-0.010034	0.00266212	24	21	0.00167842	0.0197382
g__Alloiococcus	MBTA touchscreen	Yes	-0.00437272	0.00116315	24	15	0.00171355	0.0200511
o__Sva0725	MBTA touchscreen	Yes	0.000948843	0.000252588	24	15	0.00172402	0.0200738
g__Solirubrobacter	MBTA touchscreen	Yes	0.00113314	0.000302038	24	13	0.00174171	0.0201798
g__Burkholderia	MBTA seat	No	-0.000425691	0.000113652	24	14	0.00176415	0.0203397
g__Ramlibacter	MBTA touchscreen	No	0.00172675	0.000461815	24	21	0.00178863	0.0205212
g__Paracoccus	MBTA wall	No	0.010404	0.00279483	24	22	0.00185185	0.0211434
f__Chitinophagaceae	MBTA touchscreen	No	0.00728106	0.00195857	24	21	0.00187174	0.0212673
f__Bradyrhizobiaceae	MBTA seat	Yes	0.0206525	0.00558469	24	23	0.00195038	0.0220543
g__Campylobacter	MBTA wall	No	-0.000732175	0.000198127	24	14	0.00196099	0.0220682
g__Mycoplana	MBTA touchscreen	Yes	0.00330559	0.000896497	24	15	0.00199545	0.022349
g__Campylobacter	MBTA touchscreen	Yes	-0.000725361	0.000198127	24	14	0.00210874	0.023506
g__Sporosarcina	MBTA touchscreen	Yes	0.00274545	0.000751024	24	17	0.0021333	0.0236675
g__Microbacterium	MBTA touchscreen	Yes	0.000855003	0.000234463	24	16	0.00217409	0.0238983
g__Rothia	MBTA wall	Yes	-0.00994041	0.00272596	24	21	0.00217442	0.0238983
g__Gordonia	MBTA seat	Yes	-0.00116904	0.000320826	24	16	0.00218704	0.0239252
g__Veillonella	MBTA touchscreen	No	-0.00851809	0.0023504	24	23	0.00228011	0.0248279
o__SC-I-84	MBTA wall	No	0.000462862	0.000128299	24	14	0.00236053	0.0255851
g__Leuconostoc	MBTA seat	Yes	-0.00339812	0.000943486	24	18	0.00239079	0.0256764
g__Leuconostoc	MBTA wall	Yes	-0.00339812	0.000943486	24	18	0.00239079	0.0256764
f__Caldilineaceae	MBTA touchscreen	Yes	0.000296516	8.25365e-05	24	8	0.00243731	0.0260571
f__Gemellaceae	MBTA wall	Yes	-0.0189778	0.005287	24	21	0.0024529	0.0260987
g__Faecalibacterium	MBTA touchscreen	No	0.00154128	0.000429624	24	18	0.0024634	0.0260987
g__Spirosoma	MBTA wall	No	0.00054469	0.00015245	24	15	0.00254056	0.0267955
f__Microbacteriaceae	MBTA touchscreen	Yes	0.00283762	0.000795844	24	23	0.00258037	0.0270938
f__Kineosporiaceae	MBTA wall	No	0.000952119	0.000269455	24	16	0.00276109	0.0287899
g__Veillonella	MBTA wall	No	-0.00830302	0.0023504	24	23	0.00276638	0.0287899
g__Haemophilus	MBTA wall	No	-0.0098985	0.0028057	24	19	0.00279337	0.0289427
g__Rothia	MBTA seat	Yes	-0.00959338	0.00272596	24	21	0.00284539	0.0293525
g__Gordonia	MBTA wall	No	-0.0011228	0.000320826	24	16	0.00296534	0.0304562
c__Gemm-1	MBTA touchscreen	No	0.000352961	0.000101028	24	10	0.0030032	0.0305781
g__Flavisolibacter	MBTA wall	No	0.00325468	0.000931201	24	17	0.00299411	0.0305781
f__mb2424	MBTA touchscreen	No	0.000652823	0.000187128	24	10	0.00303554	0.0307741
g__Peptococcus	MBTA grip	Yes	-0.000221017	6.34713e-05	24	7	0.0030773	0.0309308
o__SC-I-84	MBTA touchscreen	No	0.000446897	0.000128299	24	14	0.00307022	0.0309308
g__Gemmata	MBTA touchscreen	Yes	0.00079794	0.000229579	24	12	0.00311979	0.0312244
g__Capnocytophaga	MBTA seat	No	-0.00106025	0.000305606	24	12	0.00316168	0.0312449
g__Capnocytophaga	MBTA seat	Yes	-0.00106025	0.000305606	24	12	0.00316168	0.0312449
g__Capnocytophaga	MBTA wall	Yes	-0.00106025	0.000305606	24	12	0.00316168	0.0312449
g__Flavisolibacter	MBTA touchscreen	Yes	0.00321094	0.000931201	24	17	0.00330631	0.0325374
g__Hymenobacter	MBTA touchscreen	Yes	0.011114	0.00323794	24	23	0.00341802	0.0334966
f__Acetobacteraceae	MBTA wall	Yes	0.0114157	0.00334053	24	23	0.0035287	0.0344378
g__Paracoccus	MBTA touchscreen	No	0.00953902	0.00279483	24	22	0.00356038	0.0346034
g__Turicibacter	MBTA touchscreen	Yes	0.000406873	0.000119379	24	12	0.00359712	0.0348165
g__Gordonia	MBTA seat	No	-0.00108704	0.000320826	24	16	0.00375213	0.0361681
g__Solirubrobacter	MBTA touchscreen	No	0.00101931	0.000302038	24	13	0.00386019	0.0370537
g__Veillonella	MBTA seat	No	-0.00792767	0.0023504	24	23	0.00387551	0.0370537
g__Erythromicrobium	MBTA touchscreen	No	0.000503997	0.000150148	24	12	0.00401048	0.0381888
g__Wautersiella	MBTA wall	No	0.00151687	0.000454783	24	16	0.00419468	0.0397818
f__Piscirickettsiaceae	MBTA touchscreen	Yes	0.000295757	8.88742e-05	24	7	0.00426203	0.0402582
f__Acetobacteraceae	MBTA wall	No	0.0110499	0.00334053	24	23	0.00444536	0.041822
f__Ellin517	MBTA touchscreen	No	0.000603451	0.000182698	24	9	0.00449087	0.0420818
g__Virgibacillus	MBTA seat	Yes	0.0150812	0.00456943	24	24	0.00451487	0.0421388
g__Bacillus	MBTA touchscreen	No	-0.122858	0.0373083	24	24	0.00458587	0.0426323
f__Piscirickettsiaceae	MBTA touchscreen	No	0.000291078	8.88742e-05	24	7	0.00476199	0.0440953
g__Deinococcus	MBTA wall	No	0.00683837	0.00209319	24	22	0.00484496	0.0446051
g__Gordonia	MBTA wall	Yes	-0.00104722	0.000320826	24	16	0.00487394	0.0446051
o__Solibacterales	MBTA wall	No	0.000629216	0.000192761	24	13	0.00487281	0.0446051
f__Sporichthyaceae	MBTA touchscreen	Yes	0.00136205	0.000417871	24	16	0.00492176	0.0448681
f__Gemellaceae	MBTA touchscreen	Yes	-0.0171181	0.005287	24	21	0.00515192	0.0467422
g__Geodermatophilus	MBTA touchscreen	Yes	0.00308004	0.000951696	24	18	0.00516708	0.0467422
f__Gemellaceae	MBTA seat	Yes	-0.0170869	0.005287	24	21	0.0052163	0.0470067
o__SC-I-84	MBTA touchscreen	Yes	0.000414292	0.000128299	24	14	0.00524651	0.0470984
f__Conexibacteraceae	MBTA touchscreen	Yes	0.000455987	0.000141953	24	12	0.00543598	0.0486138
g__Arsenicicoccus	MBTA touchscreen	No	0.00137047	0.000429902	24	15	0.00572183	0.0509763
f__Gemellaceae	MBTA seat	No	-0.0168	0.005287	24	21	0.00584642	0.0516947
f__Methylocystaceae	MBTA wall	No	0.00464507	0.00146156	24	20	0.00583972	0.0516947
g__Kineococcus	MBTA seat	No	0.00093124	0.000293267	24	15	0.00587354	0.0517399
g__Capnocytophaga	MBTA touchscreen	Yes	-0.000960999	0.000305606	24	12	0.00626614	0.0549924
o__WD2101	MBTA wall	No	0.000665131	0.000212149	24	13	0.00639042	0.0558746
g__Micrococcus	MBTA wall	No	0.0140066	0.00447134	24	22	0.00642652	0.0559821
g__Bacillus	MBTA wall	Yes	-0.116546	0.0373083	24	24	0.00654438	0.0567985
f__Gemellaceae	MBTA touchscreen	No	-0.0164631	0.005287	24	21	0.00668279	0.0574527
g__Burkholderia	MBTA wall	No	-0.000353813	0.000113652	24	14	0.00669304	0.0574527
g__Meiothermus	MBTA seat	Yes	0.00126765	0.00040702	24	3	0.00667449	0.0574527
f__Verrucomicrobiaceae	MBTA touchscreen	No	0.000341359	0.00011026	24	10	0.00693879	0.0593456
o__Gaiellales	MBTA touchscreen	Yes	0.000389767	0.000126018	24	11	0.00698213	0.0594999
g__Blautia	MBTA touchscreen	No	0.00211577	0.000684753	24	17	0.00702792	0.0596739
g__Rothia	MBTA seat	No	-0.00838621	0.00272596	24	21	0.00722804	0.0611524
f__Caldilineaceae	MBTA touchscreen	No	0.000253056	8.25365e-05	24	8	0.00738751	0.0622775
o__[Pedosphaerales]	MBTA touchscreen	No	0.000442592	0.000144539	24	10	0.00744809	0.0625639
g__Peptoniphilus	MBTA wall	Yes	-0.00489305	0.00160228	24	19	0.0075783	0.0633311
g__Truepera	MBTA touchscreen	No	0.00105235	0.000344709	24	13	0.00759326	0.0633311
g__Mycetocola	MBTA touchscreen	Yes	0.00311149	0.00102	24	21	0.00763124	0.0634229
g__Modestobacter	MBTA touchscreen	Yes	0.00834148	0.00273719	24	20	0.00767946	0.0635989
f__Xanthomonadaceae	MBTA seat	Yes	-0.00400249	0.00131509	24	22	0.00774325	0.063837
g__Alloiococcus	MBTA wall	No	-0.00353867	0.00116315	24	15	0.00776249	0.063837
g__Fimbriimonas	MBTA wall	No	0.000588437	0.000193648	24	10	0.00782133	0.0640967
g__Leptotrichia	MBTA wall	Yes	-0.00571412	0.00188171	24	19	0.00785468	0.0641466
g__Peptococcus	MBTA touchscreen	No	-0.000192488	6.34713e-05	24	7	0.00792037	0.0644592
g__Leptotrichia	MBTA seat	Yes	-0.00569959	0.00188171	24	19	0.00798245	0.0647404
g__Kaistobacter	MBTA wall	No	0.00284356	0.00093983	24	18	0.00803813	0.064968
g__Geodermatophilus	MBTA touchscreen	No	0.00287687	0.000951696	24	18	0.00808402	0.0651151
g__Mycetocola	MBTA touchscreen	No	0.0030726	0.00102	24	21	0.00826383	0.0663363
g__Finegoldia	MBTA wall	Yes	-0.00547216	0.00181955	24	19	0.00834919	0.0667935
g__Lactococcus	MBTA seat	No	-0.0080903	0.00269158	24	19	0.00837792	0.0667962
g__Chryseobacterium	MBTA seat	No	-0.0032823	0.00109298	24	20	0.0084252	0.0669462
g__Anaerococcus	MBTA touchscreen	No	-0.00797083	0.00266212	24	21	0.00858339	0.0679735
g__Zea	MBTA wall	No	0.000556321	0.000186413	24	14	0.00876075	0.0691452
f__Syntrophobacteraceae	MBTA touchscreen	Yes	0.000285972	9.60585e-05	24	8	0.00889485	0.0699689
g__Rothia	MBTA touchscreen	No	-0.00810361	0.00272596	24	21	0.00897509	0.0703647
f__Ellin517	MBTA touchscreen	Yes	0.000542114	0.000182698	24	9	0.00907818	0.0709365
o__iii1-15	MBTA wall	No	0.00065817	0.000221959	24	17	0.00911601	0.0709962
g__Haemophilus	MBTA grip	Yes	-0.0082952	0.0028057	24	19	0.00928304	0.0720584
f__Microbacteriaceae	MBTA wall	No	0.00234376	0.000795844	24	23	0.00950902	0.0735698
g__Prevotella	MBTA seat	Yes	-0.0103415	0.00351689	24	22	0.00959776	0.0738636
g__Rothia	MBTA touchscreen	Yes	-0.00801413	0.00272596	24	21	0.00960981	0.0738636
f__Porphyromonadaceae	MBTA wall	Yes	0.118338	0.0403923	24	19	0.00981594	0.0752023
f__Conexibacteraceae	MBTA wall	No	0.000415659	0.000141953	24	12	0.0098481	0.0752036
g__Chryseobacterium	MBTA wall	Yes	-0.00319478	0.00109298	24	20	0.00995388	0.0757655
f__Methylobacteriaceae	MBTA wall	No	0.00230373	0.00079001	24	18	0.0100981	0.0766152
f__0319-6G20	MBTA seat	No	0.00190601	0.00065497	24	10	0.010225	0.0770808
g__Psychrobacter	MBTA wall	No	0.00310472	0.00106667	24	14	0.0102123	0.0770808
g__Virgibacillus	MBTA touchscreen	Yes	0.0132296	0.00456943	24	24	0.0105445	0.0792356
f__Nakamurellaceae	MBTA wall	No	0.000954833	0.000331038	24	16	0.0107852	0.0805296
g__Ammoniphilus	MBTA touchscreen	Yes	0.000592296	0.000205318	24	10	0.0107762	0.0805296
g__Dyadobacter	MBTA wall	No	0.0012911	0.000449974	24	13	0.0111279	0.0823704
g__Kocuria	MBTA touchscreen	Yes	0.0117346	0.00409028	24	22	0.0111368	0.0823704
g__Micrococcus	MBTA wall	Yes	-0.0128282	0.00447134	24	22	0.0111348	0.0823704
o__[Pedosphaerales]	MBTA touchscreen	Yes	0.000411477	0.000144539	24	10	0.0116574	0.0859502
g__Phycicoccus	MBTA touchscreen	Yes	0.000422339	0.000148911	24	10	0.0119165	0.0875866
f__Oxalobacteraceae	MBTA wall	Yes	0.0333093	0.0118172	24	24	0.0123552	0.0905275
f__Acetobacteraceae	MBTA touchscreen	No	0.00939251	0.00334053	24	23	0.0125356	0.0915642
f__EB1017	MBTA wall	No	0.00010324	3.68181e-05	24	10	0.0127341	0.0927262
f__Comamonadaceae	MBTA wall	Yes	0.025564	0.0091411	24	24	0.0129318	0.0938751
g__Lactococcus	MBTA seat	Yes	-0.00748836	0.00269158	24	19	0.013323	0.0964175
c__Gemm-3	MBTA wall	No	0.00200718	0.000722878	24	13	0.0134747	0.0972159
g__Kingella	MBTA seat	Yes	-0.000493328	0.000178608	24	12	0.0138852	0.0995669
g__Kingella	MBTA wall	Yes	-0.000493328	0.000178608	24	12	0.0138852	0.0995669
f__Comamonadaceae	MBTA seat	Yes	0.0252153	0.0091411	24	24	0.0139887	0.100004
g__Bacillus	MBTA touchscreen	Yes	-0.102536	0.0373083	24	24	0.0142822	0.101793
g__Sphingomonas	MBTA touchscreen	No	0.0141731	0.00516099	24	24	0.014346	0.101939
g__Exiguobacterium	MBTA seat	No	0.011461	0.00418126	24	18	0.0144989	0.102715
g__Modestobacter	MBTA touchscreen	No	0.00749197	0.00273719	24	20	0.0146164	0.102889
g__Prevotella	MBTA wall	Yes	-0.00962159	0.00351689	24	22	0.0146547	0.102889
o__Gaiellales	MBTA touchscreen	No	0.000344957	0.000126018	24	11	0.0146083	0.102889
f__Ellin6075	MBTA wall	No	0.00242845	0.000889451	24	18	0.0148227	0.103759
f__mb2424	MBTA wall	No	0.000507432	0.000187128	24	10	0.0153991	0.107156
o__Myxococcales	MBTA touchscreen	No	0.0135473	0.00499519	24	16	0.0153866	0.107156
g__Chryseobacterium	MBTA seat	Yes	-0.00295012	0.00109298	24	20	0.0157994	0.109294
g__Leuconostoc	MBTA seat	No	-0.00254708	0.000943486	24	18	0.0157836	0.109294
g__Bacillus	MBTA wall	No	-0.100621	0.0373083	24	24	0.0158689	0.109454
g__Candidatus Solibacter	MBTA wall	No	0.000315057	0.000116919	24	10	0.0159453	0.109659
f__Acidobacteriaceae	MBTA wall	No	0.000600276	0.000223043	24	15	0.0160553	0.110094
g__Kingella	MBTA wall	No	-0.000478206	0.000178608	24	12	0.0165186	0.111965
g__Propionivibrio	MBTA touchscreen	No	0.000221092	8.24732e-05	24	15	0.0164051	0.111965
g__Skermanella	MBTA wall	No	0.00214043	0.000799112	24	14	0.016481	0.111965
o__Rhodospirillales	MBTA touchscreen	Yes	0.00064126	0.000239444	24	13	0.0164941	0.111965
f__Patulibacteraceae	MBTA wall	No	0.000738464	0.000277226	24	16	0.0169855	0.114799
g__Peptoniphilus	MBTA seat	Yes	-0.00425415	0.00160228	24	19	0.01729	0.11646
g__Rubrobacter	MBTA touchscreen	Yes	0.00154409	0.000582123	24	15	0.0173798	0.11646
o__Sphingobacteriales	MBTA touchscreen	No	0.000556548	0.000209744	24	14	0.0173464	0.11646
g__Sphingomonas	MBTA touchscreen	Yes	0.013676	0.00516099	24	24	0.0174735	0.116755
g__Lactococcus	MBTA wall	Yes	-0.00711623	0.00269158	24	19	0.0176885	0.117856
g__Granulicatella	MBTA seat	Yes	-0.0149046	0.00564341	24	22	0.0177905	0.118201
g__Granulicatella	MBTA wall	Yes	-0.0148793	0.00564341	24	22	0.0179537	0.118616
g__Rhodoplanes	MBTA touchscreen	No	0.0017424	0.000660639	24	16	0.0179221	0.118616
g__Leptotrichia	MBTA touchscreen	Yes	-0.00493326	0.00188171	24	19	0.0185066	0.121926
g__Bdellovibrio	MBTA touchscreen	Yes	0.000360955	0.000138624	24	10	0.0191905	0.126078
g__Staphylococcus	MBTA seat	Yes	0.0136858	0.00529422	24	23	0.019937	0.130618
f__Acetobacteraceae	MBTA touchscreen	Yes	0.00862434	0.00334053	24	23	0.0200716	0.131134
g__Kingella	MBTA touchscreen	Yes	-0.000460819	0.000178608	24	12	0.0201399	0.131216
f__Beijerinckiaceae	MBTA wall	No	0.00238421	0.000926033	24	16	0.0203615	0.132086
g__Truepera	MBTA wall	No	0.000887304	0.000344709	24	13	0.0203858	0.132086
g__Prevotella	MBTA seat	No	-0.0090231	0.00351689	24	22	0.0207362	0.133988
f__Caulobacteraceae	MBTA touchscreen	Yes	0.0036068	0.00140982	24	21	0.0210455	0.135613
o__WD2101	MBTA touchscreen	No	0.00054234	0.000212149	24	13	0.0211273	0.135769
c__ML635J-21	MBTA touchscreen	No	0.000278747	0.000109478	24	10	0.0215709	0.137492
g__Megasphaera	MBTA seat	Yes	-0.000211577	8.3069e-05	24	12	0.0215331	0.137492
g__Megasphaera	MBTA wall	Yes	-0.000211577	8.3069e-05	24	12	0.0215331	0.137492
g__Mycoplana	MBTA touchscreen	No	0.00228133	0.000896497	24	15	0.0216334	0.137518
g__Williamsia	MBTA seat	Yes	-0.000871098	0.000343327	24	16	0.0219629	0.139236
o__Actinomycetales	MBTA touchscreen	Yes	0.00630302	0.00248648	24	21	0.0220654	0.13951
f__Erythrobacteraceae	MBTA wall	No	0.00107626	0.000425394	24	13	0.0222843	0.140517
g__Amaricoccus	MBTA wall	No	0.00301544	0.00119345	24	16	0.0224365	0.141098
c__Alphaproteobacteria	MBTA touchscreen	No	0.000659024	0.000261069	24	17	0.0225421	0.141384
f__Coxiellaceae	MBTA touchscreen	No	0.000176029	6.97821e-05	24	6	0.0226231	0.141515
g__Burkholderia	MBTA grip	Yes	-0.000286219	0.000113652	24	14	0.0228136	0.142328
g__Kaistobacter	MBTA wall	Yes	0.00236307	0.00093983	24	18	0.0229995	0.142879
o__Rhizobiales	MBTA wall	No	0.00204022	0.000811591	24	18	0.0230234	0.142879
f__Beijerinckiaceae	MBTA touchscreen	Yes	0.00232186	0.000926033	24	16	0.0233283	0.14439
g__Lactococcus	MBTA touchscreen	Yes	-0.0067436	0.00269158	24	19	0.0234165	0.144556
f__Gemellaceae	MBTA wall	No	-0.0131884	0.005287	24	21	0.0239376	0.147385
g__Phycicoccus	MBTA touchscreen	No	0.000367138	0.000148911	24	10	0.0253732	0.155816
g__Thermus	MBTA seat	Yes	0.00652097	0.00264672	24	16	0.0254598	0.155941
f__Solirubrobacteraceae	MBTA wall	No	0.000840164	0.000341303	24	13	0.0255697	0.156208
g__Aerococcus	MBTA seat	Yes	0.0029858	0.00121896	24	22	0.0262009	0.159649
c__Ellin6529	MBTA touchscreen	No	0.00106937	0.000437283	24	17	0.0264097	0.160506
f__Alicyclobacillaceae	MBTA touchscreen	Yes	8.35174e-05	3.41719e-05	24	5	0.0264867	0.160558
g__Bacillus	MBTA seat	No	-0.090585	0.0373083	24	24	0.0273486	0.165357
g__Williamsia	MBTA seat	No	-0.000832829	0.000343327	24	16	0.027472	0.165677
o__Ellin6067	MBTA wall	No	0.000747018	0.00030853	24	8	0.0277223	0.166759
g__Megasphaera	MBTA seat	No	-0.000200643	8.3069e-05	24	12	0.028047	0.168282
g__Chryseobacterium	MBTA grip	Yes	-0.00262731	0.00109298	24	20	0.0287007	0.171766
o__Cytophagales	MBTA touchscreen	Yes	0.000119447	5.00014e-05	24	6	0.0295664	0.176498
g__Mycobacterium	MBTA touchscreen	No	0.00254127	0.0010645	24	18	0.0296598	0.176607
g__Mycoplana	MBTA wall	No	0.00211975	0.000896497	24	15	0.0310328	0.184316
g__Pasteurella	MBTA seat	Yes	-0.00134195	0.000569498	24	12	0.0315352	0.186359
g__Pasteurella	MBTA wall	Yes	-0.00134195	0.000569498	24	12	0.0315352	0.186359
f__Chitinophagaceae	MBTA wall	No	0.00460988	0.00195857	24	21	0.0317028	0.186412
g__Megasphaera	MBTA wall	No	-0.000195585	8.3069e-05	24	12	0.0316531	0.186412
o__DS-18	MBTA wall	No	0.000478874	0.000203778	24	9	0.0319367	0.18732
g__Clostridium	MBTA wall	Yes	0.0220557	0.00943388	24	24	0.0327073	0.191362
c__ML635J-21	MBTA touchscreen	Yes	0.000255202	0.000109478	24	10	0.0331525	0.193486
g__Capnocytophaga	MBTA touchscreen	No	-0.00071022	0.000305606	24	12	0.0336203	0.194681
g__Catonella	MBTA seat	No	-0.000260147	0.00011217	24	7	0.0339367	0.194681
g__Catonella	MBTA seat	Yes	-0.000260147	0.00011217	24	7	0.0339367	0.194681
g__Catonella	MBTA touchscreen	Yes	-0.000260147	0.00011217	24	7	0.0339367	0.194681
g__Catonella	MBTA wall	Yes	-0.000260147	0.00011217	24	7	0.0339367	0.194681
g__Pasteurella	MBTA seat	No	-0.00132488	0.000569498	24	12	0.0334594	0.194681
g__Phycicoccus	MBTA wall	No	0.00034547	0.000148911	24	10	0.0338859	0.194681
f__Sinobacteraceae	MBTA wall	No	0.000683294	0.000295398	24	12	0.0343466	0.196553
g__Methylobacterium	MBTA wall	No	0.0109798	0.00477122	24	24	0.0351587	0.199998
g__Micrococcus	MBTA seat	Yes	-0.0102909	0.00447134	24	22	0.0351406	0.199998
g__Polaromonas	MBTA wall	No	0.00500845	0.00217702	24	20	0.0352037	0.199998
g__Brachybacterium	MBTA touchscreen	Yes	0.00421689	0.0018354	24	21	0.0354169	0.200242
g__Propionibacterium	MBTA grip	Yes	-0.000462349	0.000201218	24	17	0.0354017	0.200242
g__Paenibacillus	MBTA grip	Yes	0.00718061	0.00312751	24	18	0.0355273	0.200384
c__OPB56	MBTA wall	No	0.000259395	0.000113262	24	10	0.0359301	0.202171
g__Anaerococcus	MBTA wall	No	-0.00608858	0.00266212	24	21	0.0361491	0.202918
f__Sporichthyaceae	MBTA touchscreen	No	0.000954983	0.000417871	24	16	0.0362741	0.203135
g__Pasteurella	MBTA touchscreen	Yes	-0.00129696	0.000569498	24	12	0.036847	0.205853
g__Cohnella	MBTA grip	Yes	0.000247798	0.000109467	24	10	0.0378481	0.20995
g__Kingella	MBTA touchscreen	No	-0.00040437	0.000178608	24	12	0.0378238	0.20995
g__Ramlibacter	MBTA touchscreen	Yes	0.00104646	0.000461815	24	21	0.0376781	0.20995
g__Methylobacterium	MBTA seat	Yes	0.0107413	0.00477122	24	24	0.0387774	0.214599
f__Ruminococcaceae	MBTA seat	Yes	0.0135701	0.00604307	24	22	0.0392119	0.216494
g__Nesterenkonia	MBTA seat	No	0.00103646	0.000463553	24	16	0.039958	0.220097
g__Lapillicoccus	MBTA seat	Yes	-0.0149169	0.00667786	24	21	0.0401227	0.220111
g__Lapillicoccus	MBTA wall	Yes	-0.0149148	0.00667786	24	21	0.0401478	0.220111
g__Tetragenococcus	MBTA wall	Yes	0.00462853	0.0020751	24	14	0.0403794	0.220866
g__Hymenobacter	MBTA touchscreen	No	0.00719342	0.00323794	24	23	0.041086	0.224209
g__Rubrivivax	MBTA seat	No	0.00277901	0.00125689	24	14	0.0419389	0.228334
o__Bacillales	MBTA grip	Yes	0.0128789	0.00584437	24	24	0.0425445	0.231096
g__Acinetobacter	MBTA seat	Yes	-0.0331267	0.0150624	24	24	0.0429053	0.232519
f__C111	MBTA wall	No	0.000486708	0.000221535	24	14	0.0430978	0.232522
g__Phytohabitans	MBTA wall	No	0.000274216	0.000124819	24	11	0.0431037	0.232522
g__Brachybacterium	MBTA seat	Yes	-0.00402384	0.0018354	24	21	0.0434861	0.233514
g__Kaistia	MBTA wall	No	0.000151555	6.91046e-05	24	7	0.0434211	0.233514
f__Bacillaceae	MBTA grip	Yes	0.0179844	0.00821279	24	24	0.0437013	0.234136
f__Patulibacteraceae	MBTA touchscreen	Yes	0.000606183	0.000277226	24	16	0.0439733	0.234136
g__Aeromicrobium	MBTA touchscreen	Yes	0.00130082	0.00059499	24	21	0.044	0.234136
g__Finegoldia	MBTA touchscreen	Yes	-0.00398141	0.00181955	24	19	0.0438433	0.234136
g__Lapillicoccus	MBTA seat	No	-0.014508	0.00667786	24	21	0.0451844	0.239357
g__Prevotella	MBTA touchscreen	Yes	-0.00764059	0.00351689	24	22	0.0451848	0.239357
f__Xanthomonadaceae	MBTA wall	Yes	-0.00285062	0.00131509	24	22	0.0456166	0.240768
g__Rhodoplanes	MBTA touchscreen	Yes	0.00143172	0.000660639	24	16	0.0456558	0.240768
g__Eikenella	MBTA seat	Yes	-0.000372737	0.000172703	24	16	0.0464481	0.243309
g__Eikenella	MBTA wall	Yes	-0.000372737	0.000172703	24	16	0.0464481	0.243309
o__Actinomycetales	MBTA wall	No	0.00536685	0.00248648	24	21	0.0464333	0.243309
g__Acinetobacter	MBTA wall	Yes	-0.0324167	0.0150624	24	24	0.0469966	0.245196
g__Nocardioides	MBTA seat	Yes	-0.000362231	0.000168418	24	16	0.0471211	0.245196
g__Nocardioides	MBTA wall	Yes	-0.000362231	0.000168418	24	16	0.0471211	0.245196
o__OPB54	MBTA grip	Yes	0.000353469	0.000165163	24	8	0.0480968	0.249721
MBTA seat	Yes	Yes	-0.0014221	0.00037482	40	25	0.00064521	0.00382012
MBTA grip	No	No	-0.0001384	3.65e-05	40	10	0.00064734	0.00382428
MBTA touchscreen	No	No	-0.003947	0.00104128	40	32	0.00065158	0.00384088
MBTA wall	Yes	Yes	0.00033723	8.91e-05	40	10	0.00066322	0.00390093
MBTA seat	No	No	-0.001571	0.00041566	40	13	0.00067132	0.00393138
MBTA touchscreen	No	No	0.0134281	0.00355275	40	37	0.00067129	0.00393138
MBTA touchscreen	Yes	Yes	0.00084694	0.00022466	40	19	0.00068944	0.00402875
MBTA grip	No	No	-0.0002187	5.8e-05	40	20	0.00069241	0.00403733
MBTA grip	No	No	-0.0018908	0.000502	40	28	0.00069597	0.0040493
MBTA wall	No	No	8.96e-05	2.38e-05	40	6	0.00070164	0.00407343
MBTA grip	No	No	-0.0003022	8.03e-05	40	15	0.00070429	0.00408004
MBTA grip	No	No	-0.0002011	5.36e-05	40	16	0.00071996	0.00416184
MBTA seat	Yes	Yes	0.014542	0.00389483	40	35	0.00076126	0.00439112
MBTA touchscreen	No	No	0.00601522	0.00161394	40	36	0.00077516	0.00446176
MBTA grip	No	No	-0.0001623	4.36e-05	40	16	0.00078157	0.00448902
MBTA wall	No	No	0.00019329	5.21e-05	40	10	0.00081822	0.00467568
MBTA wall	No	No	0.00019354	5.22e-05	40	12	0.00081677	0.00467568
MBTA seat	Yes	Yes	-0.0032041	0.00086439	40	24	0.00081929	0.00467568
MBTA touchscreen	No	No	-0.0004591	0.00012435	40	19	0.00085301	0.0048578
MBTA touchscreen	No	No	-0.0058649	0.00159105	40	29	0.00086648	0.00491369
MBTA wall	Yes	Yes	0.00771431	0.00209267	40	22	0.00086615	0.00491369
MBTA seat	No	No	0.00055731	0.00015155	40	15	0.0008872	0.0050206
MBTA seat	Yes	Yes	-0.0004572	0.00012435	40	19	0.00088973	0.00502436
MBTA wall	No	No	0.00024264	6.6e-05	40	11	0.00089258	0.00502988
MBTA seat	Yes	Yes	0.00310912	0.00084691	40	8	0.00090275	0.00507656
MBTA touchscreen	No	No	-0.0096066	0.0026184	40	33	0.00090826	0.00509686
MBTA touchscreen	No	No	-0.0003045	8.31e-05	40	18	0.00091884	0.00514548
MBTA grip	No	No	-0.0001548	4.23e-05	40	14	0.00092418	0.00516466
MBTA wall	No	No	0.00537627	0.00147034	40	24	0.00093942	0.0052389
MBTA grip	Yes	Yes	-0.0015194	0.00041566	40	13	0.00094254	0.00524541
MBTA touchscreen	No	No	-0.0004075	0.00011166	40	16	0.00095811	0.00532105
MBTA wall	Yes	Yes	0.0003029	8.31e-05	40	18	0.00096687	0.00535867
MBTA seat	Yes	Yes	0.00286063	0.00078558	40	17	0.00097863	0.00541266
MBTA wall	Yes	Yes	0.00160411	0.00044149	40	20	0.00100015	0.00550933
MBTA touchscreen	No	No	-0.0003883	0.00010688	40	17	0.00100185	0.00550933
MBTA wall	Yes	Yes	0.00378259	0.00104128	40	32	0.00100226	0.00550933
MBTA seat	No	No	-0.0037762	0.00104128	40	32	0.0010191	0.00559047
MBTA seat	Yes	Yes	-0.0015347	0.00042361	40	23	0.00102886	0.00562107
MBTA seat	Yes	Yes	-0.0013933	0.0003845	40	27	0.00102686	0.00562107
MBTA wall	Yes	Yes	0.00072205	0.00019936	40	8	0.00103204	0.00562705
MBTA grip	Yes	Yes	0.00103257	0.00028541	40	14	0.00104317	0.00567618
MBTA seat	Yes	Yes	-0.0003861	0.00010688	40	17	0.00105688	0.00573918
MBTA grip	No	No	-0.0002398	6.67e-05	40	16	0.00110518	0.00598937
MBTA wall	No	No	0.00120746	0.00033594	40	17	0.00111187	0.00600141
MBTA wall	Yes	Yes	0.00138204	0.0003845	40	27	0.00111152	0.00600141
MBTA seat	Yes	Yes	-0.0017233	0.00047964	40	23	0.00111594	0.00601134
MBTA grip	No	No	-0.0033205	0.00092879	40	33	0.00117106	0.00629563
MBTA grip	Yes	Yes	-0.0004238	0.00011881	40	13	0.00119641	0.00640626
MBTA seat	Yes	Yes	-0.0004238	0.00011881	40	13	0.00119641	0.00640626
MBTA grip	Yes	Yes	-0.0003801	0.00010688	40	17	0.0012306	0.00656376
MBTA seat	Yes	Yes	0.00492555	0.00138489	40	11	0.00123071	0.00656376
MBTA grip	No	No	-0.0001518	4.27e-05	40	10	0.00124015	0.00660103
MBTA grip	Yes	Yes	-0.001387	0.00039036	40	23	0.00124262	0.00660111
MBTA seat	Yes	Yes	0.00095052	0.00026767	40	11	0.00124952	0.00661161
MBTA seat	Yes	Yes	-0.0003965	0.00011166	40	16	0.00124853	0.00661161
MBTA grip	No	No	-0.0003048	8.62e-05	40	14	0.00129611	0.00684468
MBTA seat	No	No	0.0935447	0.0264508	40	39	0.00129909	0.00684699
MBTA grip	No	No	-9.55e-05	2.7e-05	40	9	0.00130749	0.00687775
MBTA touchscreen	No	No	-0.0004868	0.00013793	40	17	0.00132557	0.00695924
MBTA grip	No	No	-0.0013002	0.00036894	40	22	0.00134268	0.0070342
MBTA touchscreen	Yes	Yes	0.00028749	8.16e-05	40	11	0.00134508	0.0070342
MBTA touchscreen	Yes	Yes	0.00062469	0.00017751	40	19	0.00136125	0.00710495
MBTA touchscreen	No	No	-0.0014899	0.00042361	40	23	0.00136829	0.00712785
MBTA grip	Yes	Yes	0.00018772	5.34e-05	40	7	0.00137993	0.00717455
MBTA touchscreen	No	No	-0.0004171	0.00011881	40	13	0.00139283	0.00722766
MBTA grip	No	No	-0.0004159	0.00011908	40	19	0.00146329	0.00755045
MBTA wall	No	No	0.00154175	0.00044149	40	20	0.00146346	0.00755045
MBTA seat	Yes	Yes	0.0119799	0.00343016	40	21	0.00146208	0.00755045
MBTA touchscreen	Yes	Yes	0.00039689	0.00011403	40	13	0.00150993	0.00777528
MBTA grip	Yes	Yes	-0.0019029	0.00054754	40	22	0.00153073	0.0078673
MBTA wall	Yes	Yes	0.00060273	0.00017368	40	7	0.00155142	0.00795844
MBTA grip	No	No	-0.0003758	0.00010845	40	18	0.00157091	0.00802779
MBTA wall	Yes	Yes	0.00011407	3.29e-05	40	7	0.00156873	0.00802779
MBTA touchscreen	No	No	0.0112241	0.00323941	40	26	0.00157429	0.00802978
MBTA grip	Yes	Yes	-0.0004172	0.00012058	40	16	0.00159392	0.00811451
MBTA grip	No	No	-5.53e-05	1.6e-05	40	7	0.00162469	0.00825552
MBTA grip	No	No	-9.52e-05	2.76e-05	40	10	0.00165362	0.00838666
MBTA grip	No	No	-0.000506	0.00014694	40	15	0.00166604	0.00843372
MBTA wall	No	No	0.00097557	0.00028336	40	21	0.00166927	0.0084342
MBTA touchscreen	No	No	-0.0016694	0.00048587	40	23	0.001701	0.00857841
MBTA seat	Yes	Yes	-0.0018806	0.00054754	40	22	0.00170652	0.00859013
MBTA seat	No	No	-0.0004133	0.00012058	40	16	0.0017391	0.00873777
MBTA wall	No	No	0.00010725	3.13e-05	40	6	0.00174756	0.0087639
MBTA grip	No	No	-0.0001926	5.63e-05	40	23	0.00177994	0.00890965
MBTA grip	No	No	-0.0007714	0.00022584	40	15	0.00179534	0.00897001
MBTA seat	No	No	0.00031386	9.21e-05	40	4	0.00183427	0.00914755
MBTA touchscreen	Yes	Yes	0.00277859	0.00081615	40	18	0.00184895	0.00920366
MBTA grip	No	No	-0.0002177	6.4e-05	40	15	0.00186142	0.00923156
MBTA wall	Yes	Yes	0.00027128	7.97e-05	40	12	0.00186066	0.00923156
MBTA seat	Yes	Yes	0.0641764	0.0188903	40	36	0.00188459	0.00932924
MBTA touchscreen	Yes	Yes	0.00024065	7.09e-05	40	10	0.00190399	0.00940796
MBTA grip	No	No	-7.6e-05	2.24e-05	40	7	0.00192833	0.00951072
MBTA touchscreen	Yes	Yes	0.00320004	0.0009471	40	28	0.00197951	0.00974529
MBTA seat	No	No	0.00778486	0.00230653	40	29	0.00199876	0.00982206
MBTA wall	Yes	Yes	0.00049092	0.00014552	40	15	0.00200654	0.00984232
MBTA grip	No	No	-0.0001265	3.76e-05	40	10	0.00205352	0.0100544
MBTA seat	Yes	Yes	-0.000405	0.00012058	40	16	0.00208585	0.0101941
MBTA grip	Yes	Yes	-0.0003297	9.85e-05	40	16	0.0021501	0.010489
MBTA wall	No	No	0.0001112	3.33e-05	40	6	0.00219457	0.0106866
MBTA touchscreen	No	No	-0.0017942	0.00053771	40	22	0.00221198	0.0107519
MBTA seat	No	No	-0.0010249	0.00030745	40	17	0.00223164	0.0108279
MBTA wall	No	No	0.00871488	0.0026184	40	33	0.00226192	0.010955
MBTA grip	No	No	-0.0011204	0.00033688	40	22	0.00227595	0.0109873
MBTA wall	Yes	Yes	0.00344883	0.00103698	40	24	0.00227677	0.0109873
MBTA grip	Yes	Yes	0.00748533	0.00225133	40	33	0.0022827	0.0109962
MBTA touchscreen	Yes	Yes	0.00013147	3.96e-05	40	12	0.00229224	0.0110224
MBTA touchscreen	No	No	-0.0011435	0.00034427	40	14	0.00230227	0.0110509
MBTA wall	Yes	Yes	0.00017887	5.39e-05	40	10	0.00233583	0.011192
MBTA touchscreen	No	No	-0.0030952	0.00093606	40	28	0.00239446	0.0114525
MBTA wall	Yes	Yes	0.00033831	0.00010237	40	14	0.00240558	0.0114681
MBTA grip	No	No	-0.0003754	0.00011359	40	13	0.00240624	0.0114681
MBTA seat	No	No	0.00746845	0.00226335	40	27	0.00243873	0.0116023
MBTA seat	No	No	-0.0034195	0.00103823	40	32	0.00247828	0.0117696
MBTA grip	No	No	-0.0001609	4.89e-05	40	10	0.00249519	0.0118291
MBTA seat	Yes	Yes	-6.48e-05	1.97e-05	40	10	0.00253439	0.0119727
MBTA touchscreen	No	No	-6.48e-05	1.97e-05	40	10	0.00253439	0.0119727
MBTA seat	No	No	-0.0011274	0.00034427	40	14	0.00260362	0.0122781
MBTA grip	No	No	-0.0001506	4.61e-05	40	9	0.00266738	0.0125568
MBTA touchscreen	Yes	Yes	0.00519355	0.00159105	40	29	0.00267663	0.0125783
MBTA wall	Yes	Yes	0.00053449	0.00016416	40	13	0.00273597	0.0128347
MBTA grip	No	No	-0.0001406	4.32e-05	40	11	0.00277575	0.0129987
MBTA grip	Yes	Yes	0.00330269	0.00101845	40	17	0.00283061	0.0132325
MBTA wall	Yes	Yes	0.00377964	0.00116762	40	21	0.00287384	0.0134113
MBTA seat	Yes	Yes	-0.0006552	0.00020259	40	14	0.00289573	0.0134434
MBTA touchscreen	No	No	-0.0006552	0.00020259	40	14	0.00289573	0.0134434
MBTA touchscreen	Yes	Yes	0.00119499	0.00036935	40	13	0.00288607	0.0134434
MBTA wall	No	No	0.0024194	0.00075126	40	15	0.0030007	0.0139067
MBTA touchscreen	No	No	-0.00222	0.00068985	40	18	0.00301956	0.01397
MBTA wall	No	No	0.00031212	9.7e-05	40	9	0.00303432	0.0140142
MBTA grip	Yes	Yes	-0.0015796	0.00049148	40	21	0.003051	0.014067
MBTA grip	No	No	0.00343215	0.00107077	40	23	0.00312139	0.0143669
MBTA touchscreen	Yes	Yes	0.00062833	0.0001961	40	15	0.00313103	0.0143867
MBTA touchscreen	Yes	Yes	0.00171442	0.00053771	40	22	0.00326197	0.0149628
MBTA wall	No	No	0.00023531	7.4e-05	40	11	0.00334094	0.0152904
MBTA grip	No	No	-2.93e-05	9.21e-06	40	5	0.00334477	0.0152904
MBTA seat	No	No	0.0002611	8.22e-05	40	16	0.00338111	0.0154303
MBTA grip	No	No	-0.000118	3.73e-05	40	14	0.00345584	0.0157446
MBTA wall	No	No	0.00034658	0.00010952	40	20	0.00346937	0.0157795
MBTA grip	No	No	-6.58e-05	2.08e-05	40	8	0.00350585	0.0159184
MBTA grip	Yes	Yes	-0.0010872	0.00034427	40	14	0.00352846	0.0159941
MBTA grip	Yes	Yes	0.0001249	3.96e-05	40	12	0.00353641	0.0160028
MBTA touchscreen	No	No	0.00525184	0.0016638	40	27	0.00354228	0.0160028
MBTA touchscreen	No	No	0.00731466	0.00231932	40	29	0.00356746	0.0160513
MBTA grip	Yes	Yes	-8.16e-05	2.59e-05	40	10	0.00357691	0.0160513
MBTA seat	Yes	Yes	-8.16e-05	2.59e-05	40	10	0.00357691	0.0160513
MBTA touchscreen	No	No	-8.16e-05	2.59e-05	40	10	0.00357691	0.0160513
MBTA grip	No	No	-0.0019452	0.00061918	40	22	0.00368153	0.0164933
MBTA grip	No	No	-0.0012567	0.00040012	40	25	0.00368821	0.0164957
MBTA grip	No	No	-0.0613412	0.0195678	40	39	0.00374677	0.0167298
MBTA seat	Yes	Yes	0.00903495	0.00289021	40	22	0.00383223	0.017083
MBTA seat	Yes	Yes	-0.0003287	0.0001055	40	14	0.00393434	0.0174802
MBTA touchscreen	No	No	-0.0003287	0.0001055	40	14	0.00393434	0.0174802
MBTA touchscreen	No	No	0.00114393	0.00036736	40	12	0.0039538	0.0175377
MBTA seat	No	No	0.00456249	0.0014713	40	20	0.00408745	0.0181006
MBTA grip	Yes	Yes	0.0101286	0.00327008	40	25	0.00412569	0.0182399
MBTA seat	Yes	Yes	-0.0002091	6.76e-05	40	12	0.0041776	0.0184089
MBTA touchscreen	No	No	-0.0002091	6.76e-05	40	12	0.0041776	0.0184089
MBTA touchscreen	Yes	Yes	0.00045106	0.000146	40	11	0.00420952	0.0184287
MBTA seat	No	No	0.00094114	0.00030452	40	16	0.00419814	0.0184287
MBTA seat	Yes	Yes	-0.0007237	0.00023422	40	14	0.00420654	0.0184287
MBTA touchscreen	No	No	-0.0007237	0.00023422	40	14	0.00420654	0.0184287
MBTA wall	Yes	Yes	0.00021899	7.09e-05	40	10	0.00422672	0.0184739
MBTA grip	No	No	-0.0001587	5.14e-05	40	9	0.00425481	0.0185664
MBTA wall	No	No	0.00035719	0.00011583	40	16	0.0042709	0.0186064
MBTA grip	Yes	Yes	0.00294759	0.00095666	40	24	0.00430105	0.0187075
MBTA grip	No	No	-8.57e-05	2.78e-05	40	10	0.00433105	0.0187772
MBTA touchscreen	Yes	Yes	0.00452676	0.00147034	40	24	0.00432756	0.0187772
MBTA grip	No	No	-0.0005203	0.00016967	40	14	0.0044638	0.0192905
MBTA touchscreen	No	No	0.00108619	0.00035416	40	14	0.00445968	0.0192905
MBTA grip	Yes	Yes	-0.0004223	0.00013793	40	17	0.00452384	0.0195186
MBTA wall	Yes	Yes	6.09e-05	1.99e-05	40	3	0.004613	0.0198714
MBTA seat	No	No	-0.0004694	0.00015374	40	21	0.0046209	0.0198736
MBTA grip	Yes	Yes	0.0226727	0.00743145	40	38	0.00464648	0.0199346
MBTA seat	Yes	Yes	-0.0002014	6.6e-05	40	11	0.00465733	0.0199346
MBTA touchscreen	No	No	-0.0002014	6.6e-05	40	11	0.00465733	0.0199346
MBTA touchscreen	Yes	Yes	0.00028106	9.22e-05	40	10	0.00468483	0.0200204
MBTA grip	Yes	Yes	-0.0020992	0.00068985	40	18	0.00474192	0.0202322
MBTA grip	No	No	-0.0009978	0.00032816	40	20	0.00477112	0.0203245
MBTA wall	No	No	0.00095543	0.00031465	40	21	0.00482026	0.0205014
MBTA seat	No	No	0.00236225	0.00078017	40	21	0.00492731	0.0209235
MBTA wall	Yes	Yes	0.00071243	0.00023543	40	11	0.00495041	0.0209885
MBTA touchscreen	Yes	Yes	0.00131834	0.0004362	40	16	0.00499696	0.0211525
MBTA seat	Yes	Yes	0.00514566	0.00170552	40	18	0.0050646	0.0214051
MBTA wall	Yes	Yes	0.00016038	5.33e-05	40	10	0.00514386	0.021706
MBTA seat	No	No	-0.001479	0.00049148	40	21	0.00516574	0.0217641
MBTA seat	No	No	0.00232801	0.00077401	40	19	0.00518607	0.0218156
MBTA seat	No	No	-0.000412	0.00013793	40	17	0.00546474	0.0229519
MBTA wall	Yes	Yes	0.00012949	4.34e-05	40	9	0.00551697	0.0231351
MBTA touchscreen	Yes	Yes	0.00048469	0.00016255	40	14	0.0055378	0.023181
MBTA grip	Yes	Yes	0.0788326	0.0264508	40	39	0.00555854	0.023181
MBTA touchscreen	No	No	0.00606461	0.00203457	40	22	0.00555241	0.023181
MBTA seat	Yes	Yes	-0.0016024	0.00053771	40	22	0.00556241	0.023181
MBTA seat	No	No	-0.0006961	0.00023422	40	14	0.0056776	0.0236244
MBTA touchscreen	No	No	-0.0005909	0.00019901	40	16	0.00571493	0.0237064
MBTA grip	No	No	-0.000398	0.00013403	40	15	0.00571403	0.0237064
MBTA touchscreen	Yes	Yes	0.00058927	0.00019901	40	16	0.00583572	0.0241597
MBTA seat	Yes	Yes	0.00149786	0.00050594	40	19	0.00584364	0.0241597
MBTA grip	No	No	-0.0001611	5.44e-05	40	16	0.00585118	0.0241597
MBTA grip	Yes	Yes	-0.0005989	0.00020259	40	14	0.00590792	0.0242964
MBTA seat	Yes	Yes	0.00128592	0.00043503	40	14	0.0059114	0.0242964
MBTA wall	Yes	Yes	0.00027141	9.18e-05	40	13	0.00590287	0.0242964
MBTA touchscreen	No	No	-0.0047279	0.00160059	40	29	0.00594272	0.0243878
MBTA seat	Yes	Yes	-0.0005788	0.0001961	40	15	0.00597682	0.0244531
MBTA touchscreen	No	No	-0.0005788	0.0001961	40	15	0.00597682	0.0244531
MBTA wall	No	No	0.00066232	0.00022466	40	19	0.00602937	0.0246306
MBTA wall	No	No	0.00063131	0.00021429	40	13	0.00606148	0.0247242
MBTA touchscreen	Yes	Yes	0.00222044	0.00075488	40	25	0.00613107	0.0249702
MBTA touchscreen	No	No	0.0568122	0.0193232	40	30	0.00615193	0.0249968
MBTA seat	No	No	0.00106839	0.00036342	40	15	0.00615621	0.0249968
MBTA grip	Yes	Yes	-0.0030558	0.00104128	40	32	0.00623706	0.0252869
MBTA wall	Yes	Yes	0.00041876	0.00014328	40	17	0.00642802	0.0260218
MBTA wall	No	No	0.00042515	0.00014552	40	15	0.00644264	0.0260418
MBTA seat	No	No	-0.0003256	0.00011166	40	16	0.00653796	0.0263874
MBTA grip	No	No	-6.7e-05	2.3e-05	40	9	0.00659745	0.0265876
MBTA grip	No	No	-0.0007926	0.00027298	40	20	0.00674491	0.0271412
MBTA touchscreen	Yes	Yes	0.00031779	0.00010958	40	18	0.00680122	0.0272861
MBTA wall	Yes	Yes	0.00096468	0.00033257	40	16	0.00679142	0.0272861
MBTA seat	No	No	-0.0044674	0.00154407	40	27	0.00691817	0.0277139
MBTA wall	Yes	Yes	0.00022692	7.85e-05	40	7	0.006976	0.0278625
MBTA seat	Yes	Yes	-0.0012013	0.00041566	40	13	0.00697364	0.0278625
MBTA grip	Yes	Yes	0.00178197	0.00061912	40	20	0.00718201	0.0286004
MBTA grip	Yes	Yes	0.00047069	0.00016351	40	16	0.00717314	0.0286004
MBTA grip	Yes	Yes	-0.0003307	0.00011499	40	21	0.00723209	0.0287572
MBTA seat	No	No	0.00777276	0.00270717	40	29	0.00730972	0.0290229
MBTA touchscreen	Yes	Yes	0.00058834	0.00020528	40	14	0.00740254	0.0293481
MBTA touchscreen	No	No	-0.0012664	0.00044348	40	22	0.00759979	0.0300858
MBTA touchscreen	No	No	0.00260882	0.00091457	40	23	0.00765651	0.0302658
MBTA seat	Yes	Yes	-0.0019673	0.00068985	40	18	0.00766945	0.0302724
MBTA wall	Yes	Yes	0.00032751	0.00011499	40	21	0.00774018	0.0305067
MBTA grip	No	No	-0.0002883	0.00010141	40	16	0.00784884	0.0308897
MBTA seat	Yes	Yes	0.00034073	0.00012003	40	10	0.00792584	0.0311471
MBTA touchscreen	No	No	-0.0005998	0.00021173	40	16	0.00803895	0.0314996
MBTA grip	No	No	-0.0016996	0.00059985	40	25	0.00803015	0.0314996
MBTA grip	No	No	-8.05e-05	2.86e-05	40	10	0.00837156	0.032689
MBTA grip	Yes	Yes	-0.0001017	3.61e-05	40	8	0.00840332	0.032689
MBTA seat	No	No	-0.0001017	3.61e-05	40	8	0.00840332	0.032689
MBTA seat	Yes	Yes	-0.0001017	3.61e-05	40	8	0.00840332	0.032689
MBTA touchscreen	No	No	-0.0001017	3.61e-05	40	8	0.00840332	0.032689
MBTA grip	No	No	-8.31e-05	2.95e-05	40	12	0.00841797	0.0326987
MBTA touchscreen	Yes	Yes	0.00012747	4.55e-05	40	13	0.00862396	0.0334505
MBTA seat	Yes	Yes	0.00062773	0.00022395	40	10	0.00865415	0.033471
MBTA seat	Yes	Yes	-0.0044602	0.00159105	40	29	0.00864738	0.033471
MBTA grip	No	No	-0.0003134	0.00011197	40	15	0.00873229	0.0337247
MBTA wall	Yes	Yes	0.00037966	0.00013567	40	11	0.00875113	0.033749
MBTA wall	Yes	Yes	0.0001501	5.37e-05	40	10	0.00885316	0.0340936
MBTA seat	No	No	-0.0002461	8.84e-05	40	9	0.00906281	0.0347515
MBTA touchscreen	No	No	-0.0002461	8.84e-05	40	9	0.00906281	0.0347515
MBTA wall	Yes	Yes	-0.0002461	8.84e-05	40	9	0.00906281	0.0347515
MBTA wall	No	No	0.00442538	0.00159105	40	29	0.00912544	0.0349419
MBTA seat	Yes	Yes	0.0024204	0.00087099	40	36	0.0091822	0.0351092
MBTA touchscreen	No	No	0.00237011	0.00085702	40	21	0.00948821	0.0362277
MBTA touchscreen	Yes	Yes	0.00022248	8.06e-05	40	10	0.00961781	0.0366705
MBTA seat	Yes	Yes	-0.0006201	0.00022485	40	25	0.00967059	0.0368195
MBTA grip	No	No	-0.0029605	0.00107574	40	22	0.00980525	0.0372794
MBTA seat	Yes	Yes	0.00341996	0.00124325	40	20	0.00983586	0.0373429
MBTA wall	No	No	0.00039342	0.00014328	40	17	0.0099583	0.0377545
MBTA grip	Yes	Yes	-0.0001801	6.57e-05	40	7	0.0100454	0.0378709
MBTA seat	No	No	-0.0001801	6.57e-05	40	7	0.0100454	0.0378709
MBTA seat	Yes	Yes	-0.0001801	6.57e-05	40	7	0.0100454	0.0378709
MBTA touchscreen	No	No	-0.0001801	6.57e-05	40	7	0.0100454	0.0378709
MBTA grip	No	No	-3.88e-05	1.41e-05	40	6	0.0100802	0.037949
MBTA seat	No	No	0.0137044	0.00500568	40	39	0.0101541	0.0381737
MBTA wall	Yes	Yes	0.00039915	0.000146	40	11	0.0102479	0.0384727
MBTA wall	Yes	Yes	-0.0002831	0.0001044	40	11	0.0108308	0.0406044
MBTA touchscreen	Yes	Yes	0.00036761	0.00013567	40	11	0.0108718	0.0407012
MBTA seat	No	No	-0.0001755	6.52e-05	40	11	0.0113009	0.0422486
MBTA touchscreen	No	No	0.00053634	0.00019948	40	14	0.0114407	0.042712
MBTA wall	No	No	0.00027571	0.00010271	40	16	0.0115617	0.043104
MBTA grip	No	No	-0.0001208	4.51e-05	40	12	0.0116983	0.0435528
MBTA wall	Yes	Yes	0.00091997	0.00034427	40	14	0.0119023	0.0441289
MBTA seat	Yes	Yes	-0.0002922	0.00010933	40	13	0.0119	0.0441289
MBTA touchscreen	No	No	-0.0002922	0.00010933	40	13	0.0119	0.0441289
MBTA touchscreen	No	No	0.00348789	0.00131146	40	21	0.0122723	0.0454378
MBTA grip	Yes	Yes	-0.0006226	0.00023422	40	14	0.0123171	0.0455412
MBTA grip	No	No	-0.0003259	0.00012269	40	13	0.0123616	0.045643
MBTA seat	Yes	Yes	-0.0001279	4.82e-05	40	11	0.0125145	0.0460177
MBTA touchscreen	No	No	-0.0001279	4.82e-05	40	11	0.0125145	0.0460177
MBTA wall	Yes	Yes	0.00115677	0.0004362	40	16	0.012499	0.0460177
MBTA wall	No	No	0.00014119	5.33e-05	40	10	0.0125379	0.0460408
MBTA wall	Yes	Yes	0.00056626	0.0002138	40	18	0.0126012	0.0462103
MBTA wall	Yes	Yes	0.00247633	0.00093606	40	28	0.0126941	0.0464875
MBTA seat	Yes	Yes	-0.0005253	0.00019901	40	16	0.0128716	0.0470731
MBTA grip	Yes	Yes	-0.004199	0.00159105	40	29	0.0128899	0.0470761
MBTA wall	Yes	Yes	0.00013166	4.99e-05	40	10	0.0129128	0.0470959
MBTA seat	No	No	-0.0010133	0.0003845	40	27	0.013007	0.047375
MBTA wall	Yes	Yes	0.00223026	0.00084715	40	21	0.0130909	0.0476162
MBTA seat	No	No	-5.19e-05	1.97e-05	40	10	0.0131405	0.047732
MBTA touchscreen	No	No	-0.00406	0.00154407	40	27	0.0131935	0.0478597
MBTA seat	No	No	0.00419733	0.00160059	40	29	0.0134174	0.0486064
MBTA seat	No	No	-0.0005309	0.00020259	40	14	0.0134754	0.048751
MBTA seat	No	No	0.00010338	3.96e-05	40	12	0.0137118	0.0495394
MBTA seat	Yes	Yes	0.00330635	0.00126606	40	33	0.0137692	0.0496798
MBTA seat	No	No	-0.0011573	0.00044348	40	22	0.0138323	0.0498409
MBTA touchscreen	No	No	-0.0008004	0.00030745	40	17	0.0140437	0.0504671
MBTA grip	Yes	Yes	0.00600539	0.00230653	40	29	0.0140308	0.0504671
MBTA grip	Yes	Yes	0.00282431	0.00108568	40	19	0.0141052	0.0506206
MBTA touchscreen	No	No	-0.0011783	0.00045407	40	24	0.0143223	0.0513311
MBTA grip	No	No	-0.0002108	8.15e-05	40	12	0.0146411	0.0524038
MBTA grip	Yes	Yes	-0.0007922	0.00030745	40	17	0.0149623	0.0534822
MBTA touchscreen	No	No	-0.0037861	0.00147034	40	24	0.0150208	0.0536201
MBTA wall	Yes	Yes	0.00126391	0.00049148	40	21	0.0151388	0.0539698
MBTA touchscreen	No	No	0.00255633	0.00099528	40	24	0.0152545	0.0543056
MBTA grip	Yes	Yes	-0.0040854	0.00159095	40	30	0.0152734	0.0543056
MBTA grip	Yes	Yes	-0.0011374	0.00044348	40	22	0.0153927	0.0545852
MBTA wall	Yes	Yes	0.00047722	0.00018605	40	20	0.0153784	0.0545852
MBTA grip	No	No	-0.0003296	0.00012856	40	15	0.0154253	0.0546286
MBTA grip	No	No	-7.24e-05	2.83e-05	40	7	0.0156395	0.0550968
MBTA grip	Yes	Yes	0.00021039	8.22e-05	40	16	0.015637	0.0550968
MBTA wall	No	No	0.00102613	0.00040097	40	19	0.0155951	0.0550968
MBTA grip	Yes	Yes	-0.0003933	0.00015374	40	21	0.0156227	0.0550968
MBTA seat	No	No	-6.62e-05	2.59e-05	40	10	0.0156836	0.05518
MBTA grip	No	No	-0.0002471	9.67e-05	40	18	0.0157155	0.0552199
MBTA seat	No	No	0.00059132	0.00023146	40	13	0.0157579	0.0552967
MBTA seat	Yes	Yes	0.00048836	0.00019132	40	16	0.0158372	0.0555026
MBTA touchscreen	No	No	-0.0024048	0.0009471	40	28	0.0163467	0.0572134
MBTA touchscreen	No	No	-0.0019321	0.00076276	40	18	0.0165844	0.0579699
MBTA grip	Yes	Yes	0.00107744	0.00042608	40	15	0.0167531	0.0584834
MBTA seat	Yes	Yes	-0.0001592	6.32e-05	40	12	0.0171376	0.0595935
MBTA touchscreen	No	No	-0.0001592	6.32e-05	40	12	0.0171376	0.0595935
MBTA wall	Yes	Yes	-0.0001592	6.32e-05	40	12	0.0171376	0.0595935
MBTA wall	Yes	Yes	0.00030346	0.00012075	40	15	0.0173773	0.0603491
MBTA grip	No	No	-0.0001363	5.43e-05	40	14	0.017417	0.0604089
MBTA touchscreen	No	No	-0.0010953	0.0004362	40	16	0.0174656	0.0604995
MBTA seat	Yes	Yes	0.00018579	7.4e-05	40	9	0.0174954	0.0605247
MBTA seat	Yes	Yes	-0.0019123	0.00076276	40	18	0.017627	0.0609015
MBTA grip	No	No	-0.0001938	7.74e-05	40	11	0.0177561	0.0611118
MBTA wall	No	No	0.00204442	0.00081615	40	18	0.0177138	0.0611118
MBTA grip	No	No	-0.0001298	5.18e-05	40	12	0.0177378	0.0611118
MBTA touchscreen	Yes	Yes	0.00013947	5.57e-05	40	12	0.017782	0.0611229
MBTA grip	Yes	Yes	-0.0009617	0.0003845	40	27	0.017869	0.0613434
MBTA grip	Yes	Yes	0.00057859	0.00023146	40	13	0.0179328	0.0614838
MBTA seat	No	No	0.0005621	0.00022509	40	7	0.0180364	0.0617604
MBTA seat	Yes	Yes	-0.0025952	0.00104128	40	32	0.0182458	0.0623978
MBTA grip	No	No	-0.000392	0.00015735	40	18	0.0182824	0.0624436
MBTA seat	Yes	Yes	0.0002678	0.00010756	40	10	0.0183564	0.0626166
MBTA seat	No	No	0.00045365	0.00018243	40	18	0.0184874	0.0629838
MBTA grip	Yes	Yes	-0.0011244	0.00045323	40	19	0.0187398	0.0637628
MBTA seat	Yes	Yes	-0.0010938	0.00044348	40	22	0.0193759	0.0658438
MBTA grip	No	No	-0.0022273	0.000904	40	18	0.0194948	0.0661642
MBTA seat	Yes	Yes	0.00287091	0.00116816	40	22	0.0197784	0.0670421
MBTA grip	No	No	-0.0014117	0.00057546	40	19	0.0199826	0.0676488
MBTA touchscreen	No	No	-0.0004004	0.00016351	40	16	0.0201824	0.0682394
MBTA grip	No	No	-0.0011297	0.00046167	40	36	0.0202758	0.0684692
MBTA grip	Yes	Yes	-5.46e-05	2.24e-05	40	8	0.020386	0.068497
MBTA seat	No	No	-5.46e-05	2.24e-05	40	8	0.020386	0.068497
MBTA seat	Yes	Yes	-5.46e-05	2.24e-05	40	8	0.020386	0.068497
MBTA touchscreen	No	No	-5.46e-05	2.24e-05	40	8	0.020386	0.068497
MBTA touchscreen	No	No	-0.000313	0.00012832	40	17	0.0206414	0.0692685
MBTA touchscreen	No	No	-0.002661	0.00109237	40	27	0.0207935	0.0696052
MBTA wall	Yes	Yes	-0.0002894	0.00011881	40	13	0.0207933	0.0696052
MBTA wall	No	No	0.00049839	0.00020528	40	14	0.021187	0.070834
MBTA seat	No	No	-0.00016	6.6e-05	40	11	0.0214302	0.0715581
MBTA touchscreen	No	No	-0.0008038	0.00033257	40	16	0.021728	0.0724625
MBTA touchscreen	Yes	Yes	0.00066867	0.00027723	40	15	0.0219764	0.0732001
MBTA grip	No	No	-0.0002861	0.0001187	40	10	0.0220473	0.073286
MBTA grip	No	No	-0.0041779	0.00173329	40	25	0.0220567	0.073286
MBTA grip	Yes	Yes	-0.0002128	8.84e-05	40	9	0.0222193	0.073584
MBTA seat	Yes	Yes	-0.0003503	0.00014552	40	15	0.0222285	0.073584
MBTA touchscreen	No	No	-0.0003503	0.00014552	40	15	0.0222285	0.073584
MBTA wall	Yes	Yes	0.00181632	0.00075488	40	25	0.0222746	0.073646
MBTA seat	Yes	Yes	-0.0003779	0.00015737	40	16	0.0225302	0.0743083
MBTA touchscreen	No	No	-0.0003779	0.00015737	40	16	0.0225302	0.0743083
MBTA grip	No	No	-7.89e-05	3.29e-05	40	6	0.0226733	0.0746886
MBTA grip	Yes	Yes	-0.0002527	0.0001055	40	14	0.0228217	0.0750571
MBTA grip	No	No	-4.72e-05	1.97e-05	40	7	0.022841	0.0750571
MBTA touchscreen	Yes	Yes	8.83e-05	3.69e-05	40	9	0.0228832	0.0751039
MBTA touchscreen	No	No	-0.0008041	0.00033594	40	17	0.0229173	0.0751239
MBTA seat	No	No	-0.0010434	0.0004362	40	16	0.0229992	0.0753008
MBTA seat	No	No	-0.0026115	0.00109237	40	27	0.0230752	0.0754576
MBTA touchscreen	No	No	-0.0004184	0.00017519	40	14	0.0232183	0.0758333
MBTA wall	No	No	0.00018774	7.87e-05	40	8	0.0232794	0.0759406
MBTA wall	Yes	Yes	8.8e-05	3.69e-05	40	9	0.0233198	0.0759801
MBTA grip	No	No	-0.0002059	8.65e-05	40	12	0.0235921	0.0767744
MBTA seat	No	No	-0.002227	0.00093606	40	28	0.0236948	0.0770154
MBTA seat	Yes	Yes	-0.0034971	0.00147034	40	24	0.0237315	0.0770415
MBTA seat	Yes	Yes	0.00152932	0.00064398	40	13	0.0239302	0.0775927
MBTA seat	Yes	Yes	-0.0010351	0.0004362	40	16	0.0240214	0.0777945
MBTA grip	Yes	Yes	-0.0002648	0.00011166	40	16	0.0240981	0.077949
MBTA touchscreen	Yes	Yes	0.00012769	5.39e-05	40	10	0.0243476	0.0786616
MBTA seat	No	No	-0.0001141	4.82e-05	40	11	0.0244525	0.078811
MBTA wall	Yes	Yes	0.00245591	0.00103823	40	32	0.0244432	0.078811
MBTA seat	Yes	Yes	-0.0003259	0.00013793	40	17	0.0245825	0.0789519
MBTA grip	No	No	-0.0003784	0.00016013	40	17	0.0245843	0.0789519
MBTA grip	No	No	-2.98e-05	1.26e-05	40	6	0.0245656	0.0789519
MBTA grip	No	No	-0.0010602	0.00044903	40	21	0.0246929	0.0792059
MBTA wall	No	No	0.00052825	0.00022395	40	10	0.024818	0.0794177
MBTA touchscreen	No	No	-0.0003873	0.00016416	40	13	0.0247989	0.0794177
MBTA wall	No	No	0.00339322	0.00143982	40	28	0.0249365	0.0796998
MBTA wall	Yes	Yes	0.00047735	0.00020259	40	14	0.0249655	0.0796998
MBTA touchscreen	Yes	Yes	0.00038321	0.00016312	40	12	0.0253604	0.0808646
MBTA seat	No	No	0.00012537	5.34e-05	40	7	0.0254953	0.0811984
MBTA grip	No	No	-0.0049262	0.00210196	40	39	0.0256874	0.0817134
MBTA touchscreen	No	No	0.0142593	0.00608821	40	39	0.0257742	0.081796
MBTA seat	No	No	0.00049483	0.00021125	40	15	0.0257588	0.081796
MBTA seat	No	No	-0.0003406	0.00014552	40	15	0.0258656	0.0819891
MBTA wall	Yes	Yes	6.22e-05	2.66e-05	40	6	0.0260789	0.0825679
MBTA seat	No	No	0.00525743	0.00225133	40	33	0.0261778	0.0827835
MBTA touchscreen	No	No	-0.0001401	6e-05	40	11	0.0262738	0.0829895
MBTA grip	No	No	-0.0326511	0.0140201	40	39	0.0265585	0.0837901
MBTA wall	Yes	Yes	0.00064005	0.00027523	40	17	0.0267586	0.0843224
MBTA wall	No	No	0.00077319	0.00033257	40	16	0.026799	0.0843509
MBTA grip	Yes	Yes	0.00175288	0.00075488	40	25	0.0269691	0.0847871
MBTA wall	No	No	0.00018483	7.97e-05	40	14	0.0271837	0.085362
MBTA touchscreen	No	No	-0.0007291	0.00031465	40	21	0.027258	0.0854954
MBTA wall	No	No	0.00022488	9.72e-05	40	10	0.0274899	0.0861222
MBTA wall	Yes	Yes	0.00015263	6.6e-05	40	11	0.0275972	0.0863578
MBTA grip	Yes	Yes	-0.0025241	0.00109237	40	27	0.0276702	0.0864068
MBTA grip	No	No	-0.0009555	0.00041352	40	21	0.0276772	0.0864068
MBTA wall	No	No	0.00012402	5.37e-05	40	10	0.0278232	0.086762
MBTA touchscreen	No	No	-0.0001048	4.55e-05	40	13	0.0279298	0.0869935
MBTA touchscreen	Yes	Yes	0.00018081	7.85e-05	40	7	0.028169	0.0875585
MBTA touchscreen	Yes	Yes	0.00065246	0.00028336	40	21	0.0281764	0.0875585
MBTA seat	Yes	Yes	-0.0035488	0.00154407	40	27	0.0284472	0.0882979
MBTA touchscreen	Yes	Yes	9.96e-05	4.34e-05	40	9	0.0286809	0.0889208
MBTA grip	Yes	Yes	-0.0002507	0.00010933	40	13	0.0288199	0.0891727
MBTA wall	No	No	0.00018704	8.16e-05	40	11	0.0288285	0.0891727
MBTA grip	Yes	Yes	0.00369923	0.00161512	40	26	0.0289606	0.0894783
MBTA seat	Yes	Yes	-0.0006486	0.00028336	40	21	0.0290523	0.089585
MBTA grip	Yes	Yes	0.00026504	0.00011583	40	16	0.0290951	0.089585
MBTA touchscreen	Yes	Yes	0.00018244	7.97e-05	40	14	0.0290714	0.089585
MBTA seat	Yes	Yes	-0.0010206	0.0004466	40	20	0.0292916	0.0898896
MBTA wall	No	No	0.00020366	8.91e-05	40	10	0.0292944	0.0898896
MBTA touchscreen	Yes	Yes	0.00199993	0.00087512	40	16	0.029291	0.0898896
MBTA seat	No	No	0.00065115	0.00028541	40	14	0.0295448	0.0905548
MBTA grip	Yes	Yes	-0.0021335	0.00093606	40	28	0.0296877	0.0908889
MBTA grip	Yes	Yes	-7.92e-05	3.48e-05	40	9	0.0297758	0.0909514
MBTA touchscreen	No	No	-7.92e-05	3.48e-05	40	9	0.0297758	0.0909514
MBTA grip	No	No	-6.02e-05	2.64e-05	40	10	0.0299161	0.0912572
MBTA wall	Yes	Yes	-0.0004737	0.00020817	40	16	0.0299438	0.0912572
MBTA touchscreen	Yes	Yes	0.00029133	0.00012832	40	17	0.0302906	0.0922096
MBTA wall	No	No	0.00028375	0.00012582	40	16	0.031325	0.0952506
MBTA seat	Yes	Yes	-0.0001611	7.15e-05	40	12	0.0314501	0.0954152
MBTA touchscreen	No	No	-0.0001611	7.15e-05	40	12	0.0314501	0.0954152
MBTA grip	No	No	-0.0001191	5.29e-05	40	12	0.0315411	0.0955834
MBTA grip	No	No	0.00145302	0.00064554	40	15	0.0316311	0.0957481
MBTA seat	Yes	Yes	-0.0003407	0.00015155	40	15	0.0318068	0.0960009
MBTA touchscreen	No	No	-0.0003407	0.00015155	40	15	0.0318068	0.0960009
MBTA touchscreen	No	No	-0.0004878	0.00021698	40	17	0.0318217	0.0960009
MBTA seat	Yes	Yes	-0.0007549	0.00033594	40	17	0.0318842	0.0960814
MBTA touchscreen	No	No	-0.0009905	0.00044149	40	20	0.0321408	0.0967463
MBTA seat	Yes	Yes	-0.0009875	0.00044149	40	20	0.0326417	0.0981443
MBTA wall	Yes	Yes	0.00138055	0.00061912	40	20	0.0331344	0.0994032
MBTA grip	No	No	-4.36e-05	1.96e-05	40	9	0.0331232	0.0994032
MBTA seat	Yes	Yes	-0.0001163	5.22e-05	40	12	0.0332204	0.0995501
MBTA wall	Yes	Yes	-0.0005115	0.0002296	40	19	0.0332994	0.0996756
MBTA seat	Yes	Yes	-0.008807	0.00396563	40	39	0.0338032	0.101071
MBTA wall	Yes	Yes	0.00023397	0.0001055	40	14	0.034039	0.101663
MBTA seat	No	No	0.00053748	0.00024254	40	15	0.0341604	0.101912
MBTA seat	Yes	Yes	-0.0003621	0.00016351	40	16	0.0342517	0.102072
MBTA seat	Yes	Yes	-0.0004316	0.0001955	40	20	0.0348033	0.103486
MBTA grip	Yes	Yes	-0.000963	0.0004362	40	16	0.0347969	0.103486
MBTA touchscreen	Yes	Yes	0.00093693	0.00042608	40	15	0.03547	0.105352
MBTA seat	Yes	Yes	0.00024082	0.00010958	40	18	0.0355698	0.105531
MBTA seat	Yes	Yes	-0.0007844	0.00035767	40	20	0.0359259	0.106471
MBTA touchscreen	No	No	-8.67e-05	3.96e-05	40	12	0.036093	0.106733
MBTA seat	No	No	-0.0003597	0.00016416	40	13	0.0360939	0.106733
MBTA touchscreen	No	No	-0.0028369	0.00129653	40	22	0.0363281	0.107299
MBTA seat	Yes	Yes	-0.000449	0.00020528	40	14	0.036405	0.107299
MBTA touchscreen	No	No	-0.000449	0.00020528	40	14	0.036405	0.107299
MBTA seat	Yes	Yes	-9.94e-05	4.55e-05	40	13	0.0364716	0.107378
MBTA seat	No	No	-0.0001474	6.76e-05	40	12	0.0369219	0.108584
MBTA grip	No	No	-0.0009901	0.00045426	40	21	0.0370113	0.108728
MBTA grip	No	No	-0.0006752	0.00031012	40	19	0.0372037	0.109174
MBTA touchscreen	Yes	Yes	0.0086226	0.00396563	40	39	0.0374334	0.109729
MBTA grip	Yes	Yes	0.00245888	0.00113169	40	25	0.0375633	0.109989
MBTA seat	No	No	-0.000237	0.00010933	40	13	0.0379953	0.111133
MBTA touchscreen	Yes	Yes	0.0003184	0.00014695	40	11	0.0380628	0.11121
MBTA seat	Yes	Yes	0.0018337	0.00084715	40	21	0.0382406	0.111608
MBTA grip	No	No	-6.16e-05	2.85e-05	40	10	0.0384131	0.111978
MBTA seat	No	No	-0.0031789	0.00147034	40	24	0.0384507	0.111978
MBTA grip	No	No	-0.0013373	0.00061889	40	21	0.0385602	0.112175
MBTA grip	No	No	-3.75e-05	1.74e-05	40	7	0.0395789	0.11489
MBTA grip	Yes	Yes	-0.0003528	0.00016416	40	13	0.0395419	0.11489
MBTA wall	No	No	0.00129795	0.00060488	40	22	0.0398297	0.115493
MBTA wall	Yes	Yes	0.00023495	0.00010952	40	20	0.0398757	0.115502
MBTA wall	No	No	5.7e-05	2.66e-05	40	6	0.0401676	0.116222
MBTA wall	No	No	0.00040963	0.00019132	40	16	0.0402398	0.116306
MBTA seat	Yes	Yes	0.00559951	0.0026184	40	33	0.0404624	0.116824
MBTA seat	No	No	0.00013502	6.32e-05	40	12	0.0406919	0.11736
MBTA grip	No	No	-0.002398	0.00112341	40	30	0.0408074	0.117567
MBTA wall	Yes	Yes	-0.0001401	6.57e-05	40	7	0.0409026	0.117716
MBTA touchscreen	Yes	Yes	0.00021831	0.00010237	40	14	0.0409799	0.117764
MBTA touchscreen	Yes	Yes	7.93e-05	3.72e-05	40	7	0.041016	0.117764
MBTA seat	No	No	-0.0003735	0.00017519	40	14	0.041051	0.117764
MBTA grip	No	No	-8.85e-05	4.16e-05	40	7	0.0415544	0.119081
MBTA grip	No	No	-0.000239	0.00011272	40	17	0.0421108	0.120291
MBTA grip	No	No	-8.32e-05	3.92e-05	40	11	0.0420852	0.120291
MBTA grip	No	No	-0.0006345	0.00029931	40	17	0.042108	0.120291
MBTA wall	No	No	0.00200632	0.0009471	40	28	0.0422597	0.120588
MBTA wall	No	No	0.0001487	7.03e-05	40	14	0.0425748	0.121359
MBTA touchscreen	Yes	Yes	0.00517377	0.00244729	40	29	0.042653	0.121453
MBTA wall	Yes	Yes	0.00036162	0.0001712	40	14	0.0428151	0.121657
MBTA touchscreen	No	No	-0.0004597	0.00021759	40	15	0.0427803	0.121657
MBTA touchscreen	Yes	Yes	5.02e-05	2.38e-05	40	6	0.0432502	0.122763
MBTA grip	Yes	Yes	-0.0001424	6.76e-05	40	12	0.0433506	0.122918
MBTA wall	Yes	Yes	0.00820086	0.00389483	40	35	0.0434397	0.123041
MBTA touchscreen	No	No	-0.0004721	0.00022466	40	19	0.0438374	0.123849
MBTA seat	Yes	Yes	-0.0002396	0.00011403	40	13	0.0438631	0.123849
MBTA touchscreen	No	No	-0.0002396	0.00011403	40	13	0.0438631	0.123849
MBTA grip	No	No	-0.0011008	0.00052431	40	28	0.0440172	0.124153
MBTA wall	No	No	0.00021201	0.00010108	40	16	0.0442076	0.12456
MBTA grip	Yes	Yes	9.09e-05	4.34e-05	40	9	0.0445523	0.1254
MBTA wall	Yes	Yes	0.00026218	0.00012582	40	16	0.0455118	0.127832
MBTA touchscreen	No	No	-0.000291	0.00013966	40	15	0.0455028	0.127832
MBTA grip	Yes	Yes	0.0126496	0.00607465	40	30	0.0456532	0.128096
MBTA wall	Yes	Yes	-0.0001	4.81e-05	40	8	0.0460942	0.129198
MBTA wall	No	No	0.00026642	0.00012832	40	17	0.0462617	0.129533
MBTA grip	No	No	-0.0015824	0.00076317	40	28	0.0465279	0.130142
MBTA touchscreen	No	No	-0.0009383	0.00045323	40	19	0.0468555	0.130923
MBTA seat	No	No	-0.0032926	0.00159095	40	30	0.0469136	0.130949
MBTA grip	No	No	-0.000161	7.79e-05	40	11	0.0471632	0.131509
MBTA seat	Yes	Yes	0.00361964	0.00175229	40	33	0.0473052	0.131768
MBTA grip	Yes	Yes	0.00033632	0.00016312	40	12	0.0476968	0.132722
MBTA seat	Yes	Yes	-0.0007092	0.00034427	40	14	0.0478678	0.133004
MBTA wall	No	No	-0.0032969	0.00160059	40	29	0.0478972	0.133004
MBTA touchscreen	Yes	Yes	0.0002013	9.78e-05	40	12	0.0480276	0.133228
MBTA touchscreen	Yes	Yes	0.00266406	0.00129653	40	22	0.0484132	0.13416
MBTA touchscreen	Yes	Yes	0.00035165	0.0001712	40	14	0.0484831	0.134215
MBTA seat	No	No	-0.0018034	0.00087868	40	32	0.0486516	0.134543
MBTA grip	No	No	-0.002585	0.00126093	40	19	0.0488923	0.135069
MBTA touchscreen	No	No	-0.0002471	0.00012058	40	16	0.0489492	0.135088
MBTA wall	No	No	0.00812555	0.00396563	40	39	0.049008	0.135111
MBTA seat	Yes	Yes	-0.0001805	8.84e-05	40	9	0.0497275	0.136955
MBTA seat	Yes	Yes	-0.0001817	8.91e-05	40	10	0.0500699	0.137615
MBTA touchscreen	No	No	-0.0001817	8.91e-05	40	10	0.0500699	0.137615
MBTA touchscreen	Yes	Yes	0.00067596	0.00033257	40	16	0.0507421	0.139215
MBTA wall	Yes	Yes	0.00035235	0.00017336	40	15	0.0507554	0.139215
MBTA wall	No	No	0.00043398	0.0002138	40	18	0.0510299	0.139825
MBTA touchscreen	No	No	-0.0002219	0.00010952	40	20	0.0514602	0.140717
MBTA seat	Yes	Yes	-0.0015294	0.00075488	40	25	0.0514393	0.140717
MBTA seat	Yes	Yes	0.0006007	0.00029685	40	18	0.0517095	0.14109
MBTA grip	No	No	-0.0207212	0.0102422	40	30	0.0517558	0.14109
MBTA seat	Yes	Yes	-0.0002045	0.00010108	40	16	0.0518066	0.14109
MBTA touchscreen	No	No	-0.0002045	0.00010108	40	16	0.0518066	0.14109
MBTA seat	No	No	-0.0032146	0.00159105	40	29	0.0520501	0.14161
MBTA grip	Yes	Yes	-0.0003539	0.00017519	40	14	0.0521177	0.14165
MBTA wall	Yes	Yes	0.00031859	0.0001578	40	17	0.0522096	0.141757
MBTA grip	Yes	Yes	-0.0029652	0.00147034	40	24	0.0524613	0.142297
MBTA seat	No	No	-0.0001384	6.88e-05	40	10	0.0531577	0.14375
MBTA seat	Yes	Yes	-0.0001384	6.88e-05	40	10	0.0531577	0.14375
MBTA touchscreen	No	No	-0.0001384	6.88e-05	40	10	0.0531577	0.14375
MBTA wall	Yes	Yes	-0.0003852	0.00019202	40	16	0.0536679	0.144984
MBTA wall	Yes	Yes	3.51e-05	1.75e-05	40	11	0.0539247	0.145532
MBTA grip	Yes	Yes	0.0005717	0.00028555	40	15	0.0540907	0.145833
MBTA seat	No	No	-0.0003902	0.0001961	40	15	0.0555196	0.149536
MBTA wall	No	No	0.00186011	0.00093606	40	28	0.0557996	0.150113
MBTA touchscreen	No	No	-0.0010232	0.00051502	40	20	0.0558454	0.150113
MBTA grip	No	No	-0.0006268	0.00031667	40	18	0.0567337	0.152348
MBTA touchscreen	No	No	-0.0001623	8.22e-05	40	16	0.0573612	0.153879
MBTA grip	Yes	Yes	-0.0009577	0.00048587	40	23	0.0576914	0.154611
MBTA seat	Yes	Yes	-0.0004417	0.00022466	40	19	0.0583172	0.156058
MBTA seat	No	No	-0.0001987	0.00010108	40	16	0.0583474	0.156058
MBTA grip	No	No	-1.7e-05	8.63e-06	40	7	0.0584413	0.156153
MBTA seat	No	No	-0.0005565	0.00028336	40	21	0.0585657	0.15633
MBTA wall	No	No	0.00254325	0.00129653	40	22	0.0588451	0.156709
MBTA grip	No	No	-0.000114	5.81e-05	40	18	0.0587697	0.156709
MBTA grip	No	No	-0.000141	7.19e-05	40	11	0.0588825	0.156709
MBTA wall	Yes	Yes	0.00055558	0.00028336	40	21	0.0589497	0.156733
MBTA seat	Yes	Yes	0.00850115	0.00433799	40	35	0.0590752	0.156911
MBTA touchscreen	No	No	-0.0003826	0.0001955	40	20	0.0594312	0.157612
MBTA grip	No	No	-4.87e-05	2.49e-05	40	7	0.0594563	0.157612
MBTA grip	No	No	-5.4e-05	2.76e-05	40	10	0.0596349	0.15793
MBTA touchscreen	Yes	Yes	0.00310799	0.00159095	40	30	0.0598301	0.158291
MBTA grip	No	No	0.0823225	0.0421634	40	39	0.0599646	0.15849
MBTA wall	No	No	0.00049318	0.00025287	40	15	0.0602283	0.159031
MBTA wall	Yes	Yes	0.00020964	0.00010756	40	10	0.0603942	0.159313
MBTA seat	No	No	-0.0009464	0.00048587	40	23	0.0605332	0.159523
MBTA touchscreen	Yes	Yes	0.00085916	0.00044149	40	20	0.0607641	0.159974
MBTA grip	No	No	-3.42e-05	1.76e-05	40	6	0.0610023	0.160444
MBTA seat	Yes	Yes	7.22e-05	3.72e-05	40	7	0.0612367	0.160757
MBTA grip	Yes	Yes	-0.0014808	0.00076276	40	18	0.0613511	0.160757
MBTA seat	Yes	Yes	-0.0001548	7.97e-05	40	14	0.0613605	0.160757
MBTA touchscreen	No	No	-0.0001548	7.97e-05	40	14	0.0613605	0.160757
MBTA touchscreen	Yes	Yes	0.00033638	0.00017336	40	15	0.0614843	0.160925
MBTA touchscreen	Yes	Yes	0.00185481	0.00095666	40	24	0.0616712	0.161257
MBTA touchscreen	Yes	Yes	0.00018665	9.7e-05	40	9	0.0636699	0.166321
MBTA seat	No	No	-0.0003824	0.00019901	40	16	0.063886	0.166724
MBTA wall	No	No	0.00010357	5.39e-05	40	10	0.0640951	0.167107
MBTA grip	No	No	-0.0002171	0.00011332	40	18	0.0647154	0.168319
MBTA seat	Yes	Yes	-7.57e-05	3.96e-05	40	12	0.0648104	0.168319
MBTA wall	Yes	Yes	0.00223043	0.00116487	40	17	0.0647923	0.168319
MBTA grip	No	No	-0.0003596	0.00018772	40	14	0.0646571	0.168319
MBTA wall	No	No	0.00085446	0.0004466	40	20	0.0649908	0.168625
MBTA grip	Yes	Yes	-0.0001702	8.91e-05	40	10	0.0654346	0.169612
MBTA seat	Yes	Yes	-0.0009829	0.00051502	40	20	0.065639	0.169978
MBTA grip	No	No	-0.0001213	6.36e-05	40	10	0.065959	0.170151
MBTA touchscreen	No	No	-0.0002398	0.00012582	40	16	0.0659167	0.170151
MBTA grip	No	No	-0.0007594	0.0003982	40	15	0.0657974	0.170151
MBTA wall	Yes	Yes	0.00057595	0.0003021	40	17	0.0658955	0.170151
MBTA grip	No	No	-0.0007005	0.00036794	40	24	0.0662605	0.170721
MBTA seat	No	No	0.0006808	0.00035767	40	20	0.066307	0.170721
MBTA grip	No	No	-0.0028048	0.00147599	40	36	0.066735	0.171659
MBTA grip	Yes	Yes	0.00165343	0.00087099	40	36	0.0669973	0.17184
MBTA grip	Yes	Yes	2.19e-05	1.16e-05	40	5	0.0669501	0.17184
MBTA grip	No	No	-7.91e-05	4.17e-05	40	8	0.0669834	0.17184
MBTA touchscreen	No	No	-0.0027307	0.00143982	40	28	0.0672362	0.172125
MBTA grip	No	No	-5.35e-05	2.82e-05	40	10	0.0672264	0.172125
MBTA grip	No	No	-0.0039121	0.00206444	40	35	0.0674549	0.17252
MBTA grip	No	No	-0.000108	5.7e-05	40	10	0.0675244	0.172534
MBTA touchscreen	Yes	Yes	0.00045894	0.00024254	40	15	0.0678302	0.173151
MBTA seat	Yes	Yes	-0.0001518	8.06e-05	40	10	0.0690186	0.17585
MBTA touchscreen	No	No	-0.0001518	8.06e-05	40	10	0.0690186	0.17585
MBTA touchscreen	No	No	0.168943	0.0898334	40	39	0.0694458	0.176104
MBTA seat	Yes	Yes	-0.0003059	0.00016255	40	14	0.0692709	0.176104
MBTA touchscreen	No	No	-0.0003059	0.00016255	40	14	0.0692709	0.176104
MBTA grip	Yes	Yes	0.00319875	0.00170029	40	28	0.0693527	0.176104
MBTA grip	Yes	Yes	0.00867808	0.00461344	40	35	0.0693881	0.176104
MBTA seat	No	No	-0.0010291	0.00054754	40	22	0.0695957	0.176318
MBTA grip	No	No	-0.0005387	0.00028687	40	14	0.069855	0.176808
MBTA seat	No	No	-0.000422	0.00022485	40	25	0.0699937	0.176993
MBTA wall	Yes	Yes	-0.0016473	0.00087868	40	32	0.0702705	0.177525
MBTA grip	Yes	Yes	-9.55e-05	5.1e-05	40	9	0.0704877	0.177574
MBTA seat	Yes	Yes	-9.55e-05	5.1e-05	40	9	0.0704877	0.177574
MBTA touchscreen	No	No	-9.55e-05	5.1e-05	40	9	0.0704877	0.177574
MBTA wall	Yes	Yes	-0.000122	6.52e-05	40	11	0.0706909	0.177919
MBTA touchscreen	Yes	Yes	0.00074909	0.00040097	40	19	0.0712123	0.179063
MBTA wall	Yes	Yes	-0.0001314	7.04e-05	40	14	0.0714315	0.179447
MBTA seat	Yes	Yes	-0.0002344	0.00012582	40	16	0.0719817	0.18066
MBTA grip	No	No	-7.3e-05	3.92e-05	40	9	0.0722744	0.181225
MBTA grip	No	No	-1.14e-05	6.12e-06	40	5	0.0724383	0.181467
MBTA seat	No	No	-0.0002918	0.00015737	40	16	0.0731936	0.183188
MBTA touchscreen	Yes	Yes	5.6e-05	3.02e-05	40	7	0.0734945	0.18377
MBTA touchscreen	No	No	-0.0029441	0.00159095	40	30	0.0737913	0.184341
MBTA wall	Yes	Yes	0.00027969	0.00015155	40	15	0.0745206	0.18599
MBTA seat	No	No	-0.0004127	0.00022466	40	19	0.0758264	0.187681
MBTA grip	Yes	Yes	0.00061743	0.00033594	40	17	0.0756726	0.187681
MBTA grip	Yes	Yes	-0.0003657	0.00019901	40	16	0.0757077	0.187681
MBTA seat	No	No	0.00030926	0.00016831	40	5	0.075751	0.187681
MBTA touchscreen	Yes	Yes	0.00046503	0.00025287	40	15	0.0755075	0.187681
MBTA touchscreen	No	No	-0.0003758	0.0002046	40	18	0.0758194	0.187681
MBTA seat	Yes	Yes	-0.0003991	0.00021698	40	17	0.0754423	0.187681
MBTA wall	Yes	Yes	0.00053875	0.00029326	40	16	0.0757967	0.187681
MBTA wall	Yes	Yes	4.9e-05	2.67e-05	40	6	0.0756785	0.187681
MBTA seat	Yes	Yes	-5.53e-05	3.02e-05	40	7	0.0768375	0.189486
MBTA touchscreen	No	No	-5.53e-05	3.02e-05	40	7	0.0768375	0.189486
MBTA wall	No	No	-5.53e-05	3.02e-05	40	7	0.0768375	0.189486
MBTA wall	Yes	Yes	-5.53e-05	3.02e-05	40	7	0.0768375	0.189486
MBTA touchscreen	No	No	-0.0001944	0.00010626	40	23	0.0770121	0.189742
MBTA seat	No	No	-0.0003753	0.00020528	40	14	0.0771302	0.189859
MBTA seat	Yes	Yes	-9.52e-05	5.21e-05	40	10	0.0773765	0.189943
MBTA touchscreen	No	No	-9.52e-05	5.21e-05	40	10	0.0773765	0.189943
MBTA seat	No	No	-0.0001927	0.0001055	40	14	0.0773733	0.189943
MBTA touchscreen	Yes	Yes	6.01e-05	3.29e-05	40	7	0.0775135	0.190106
MBTA touchscreen	No	No	-0.000506	0.00027723	40	15	0.077606	0.190159
MBTA seat	Yes	Yes	-0.0016017	0.00087868	40	32	0.0779806	0.190903
MBTA touchscreen	Yes	Yes	0.00052005	0.00028555	40	15	0.0782426	0.19137
MBTA seat	Yes	Yes	-0.0001511	8.31e-05	40	18	0.0786544	0.192203
MBTA seat	No	No	-0.0008232	0.00045323	40	19	0.0790161	0.192911
MBTA grip	No	No	0.00136131	0.00075015	40	7	0.079254	0.193317
MBTA touchscreen	Yes	Yes	0.00309421	0.00170552	40	18	0.0793311	0.193329
MBTA seat	No	No	0.0218639	0.0120586	40	39	0.0795037	0.193574
MBTA seat	Yes	Yes	-0.0007714	0.00042608	40	15	0.079935	0.194097
MBTA touchscreen	No	No	-0.0007714	0.00042608	40	15	0.079935	0.194097
MBTA touchscreen	No	No	-0.0070528	0.00389483	40	35	0.0798724	0.194097
MBTA grip	No	No	-2.55e-05	1.41e-05	40	6	0.0801708	0.194494
MBTA seat	Yes	Yes	-6.28e-05	3.48e-05	40	9	0.0806353	0.195444
MBTA touchscreen	No	No	-0.0002177	0.00012075	40	15	0.0810849	0.196357
MBTA touchscreen	No	No	-0.0021052	0.00116816	40	22	0.0812508	0.196582
MBTA grip	Yes	Yes	-0.010956	0.00608821	40	39	0.0816738	0.197427
MBTA grip	Yes	Yes	-7.6e-05	4.23e-05	40	7	0.0822233	0.198221
MBTA seat	Yes	Yes	-7.6e-05	4.23e-05	40	7	0.0822233	0.198221
MBTA touchscreen	No	No	-7.6e-05	4.23e-05	40	7	0.0822233	0.198221
MBTA grip	No	No	-7.59e-05	4.23e-05	40	12	0.0824298	0.198541
MBTA grip	Yes	Yes	-0.0001183	6.6e-05	40	11	0.0828774	0.19944
MBTA grip	Yes	Yes	-8.64e-05	4.82e-05	40	11	0.0831468	0.199909
MBTA grip	No	No	-0.0004798	0.00026817	40	19	0.0833861	0.200305
MBTA wall	Yes	Yes	-7.07e-05	3.96e-05	40	12	0.0837581	0.20102
MBTA touchscreen	Yes	Yes	0.00024942	0.00013966	40	15	0.0839129	0.201032
MBTA seat	Yes	Yes	-0.0004951	0.00027723	40	15	0.0839102	0.201032
MBTA seat	No	No	-0.0013601	0.00076276	40	18	0.0843523	0.201367
MBTA grip	Yes	Yes	-0.0001265	7.09e-05	40	10	0.0842887	0.201367
MBTA seat	No	No	-0.0001265	7.09e-05	40	10	0.0842887	0.201367
MBTA touchscreen	No	No	-0.0001265	7.09e-05	40	10	0.0842887	0.201367
MBTA seat	No	No	-0.000377	0.00021173	40	16	0.0847621	0.202166
MBTA grip	Yes	Yes	-0.0007801	0.00044149	40	20	0.0870763	0.207501
MBTA seat	No	No	0.0107017	0.00607465	40	30	0.0879804	0.209284
MBTA touchscreen	Yes	Yes	8.79e-05	4.99e-05	40	10	0.0879401	0.209284
MBTA seat	Yes	Yes	-0.0002123	0.00012075	40	15	0.0886321	0.210648
MBTA seat	Yes	Yes	-0.0003754	0.00021429	40	13	0.0897131	0.212653
MBTA touchscreen	No	No	-0.0003754	0.00021429	40	13	0.0897131	0.212653
MBTA wall	No	No	0.00030378	0.00017336	40	15	0.0896204	0.212653
MBTA seat	No	No	2.85e-05	1.63e-05	40	7	0.0901	0.213032
MBTA wall	No	No	0.00090081	0.00051502	40	20	0.0901737	0.213032
MBTA seat	Yes	Yes	0.00014877	8.51e-05	40	12	0.09019	0.213032
MBTA wall	Yes	Yes	-0.000211	0.00012058	40	16	0.0899847	0.213032
MBTA touchscreen	Yes	Yes	0.00011008	6.31e-05	40	8	0.0909912	0.214383
MBTA seat	Yes	Yes	-0.0001609	9.22e-05	40	10	0.0910011	0.214383
MBTA touchscreen	No	No	-0.0001609	9.22e-05	40	10	0.0910011	0.214383
MBTA grip	No	No	-0.0002176	0.00012479	40	11	0.0910946	0.214415
MBTA grip	Yes	Yes	-0.0007753	0.0004466	40	20	0.092485	0.217004
MBTA seat	Yes	Yes	-0.0001231	7.09e-05	40	10	0.0925979	0.217004
MBTA touchscreen	Yes	Yes	0.00179972	0.00103698	40	24	0.0925775	0.217004
MBTA seat	Yes	Yes	0.128497	0.0739966	40	40	0.0924015	0.217004
MBTA seat	No	No	-0.0006777	0.00039036	40	23	0.0924693	0.217004
MBTA wall	No	No	0.00042075	0.00024254	40	15	0.0927165	0.217092
MBTA grip	Yes	Yes	-0.0001506	8.7e-05	40	9	0.0934147	0.218157
MBTA seat	Yes	Yes	-0.0001506	8.7e-05	40	9	0.0934147	0.218157
MBTA touchscreen	No	No	-0.0001506	8.7e-05	40	9	0.0934147	0.218157
MBTA seat	Yes	Yes	-0.0001406	8.16e-05	40	11	0.0948839	0.221012
MBTA touchscreen	No	No	-0.0001406	8.16e-05	40	11	0.0948839	0.221012
MBTA grip	No	No	-0.0001784	0.00010352	40	16	0.0947645	0.221012
MBTA seat	Yes	Yes	-0.0011957	0.00069606	40	22	0.0957982	0.222949
MBTA wall	No	No	6.38e-05	3.72e-05	40	7	0.0962294	0.223565
MBTA seat	No	No	-0.0005706	0.00033257	40	16	0.0962206	0.223565
MBTA wall	No	No	0.00199568	0.00116762	40	21	0.0974122	0.226117
MBTA grip	Yes	Yes	0.00507996	0.0029811	40	30	0.098377	0.22816
MBTA seat	No	No	0.00046794	0.00027523	40	17	0.0991058	0.229652
MBTA seat	No	No	-7.72e-05	4.55e-05	40	13	0.099275	0.229846
MBTA seat	Yes	Yes	-0.0002431	0.00014328	40	17	0.0997766	0.23061
MBTA touchscreen	No	No	-0.0001743	0.00010271	40	16	0.0996983	0.23061
MBTA seat	Yes	Yes	-0.0003531	0.00020817	40	16	0.0998733	0.230635
MBTA grip	No	No	-5.65e-05	3.34e-05	40	8	0.10108	0.233222
MBTA grip	Yes	Yes	0.00159766	0.0009471	40	28	0.101661	0.234276
MBTA grip	Yes	Yes	-2.93e-05	1.74e-05	40	5	0.10206	0.234276
MBTA seat	No	No	-2.93e-05	1.74e-05	40	5	0.10206	0.234276
MBTA seat	Yes	Yes	-2.93e-05	1.74e-05	40	5	0.10206	0.234276
MBTA touchscreen	No	No	-2.93e-05	1.74e-05	40	5	0.10206	0.234276
MBTA grip	Yes	Yes	-0.0006026	0.00035767	40	20	0.102049	0.234276
MBTA grip	Yes	Yes	-0.0002347	0.00013966	40	15	0.102866	0.235723
MBTA grip	No	No	-0.0020551	0.00122257	40	29	0.102819	0.235723
MBTA seat	No	No	0.00294306	0.00175229	40	33	0.103096	0.23605
MBTA touchscreen	No	No	-0.000118	7.03e-05	40	14	0.103369	0.236473
MBTA grip	Yes	Yes	-6.58e-05	3.93e-05	40	8	0.10395	0.236749
MBTA seat	No	No	-6.58e-05	3.93e-05	40	8	0.10395	0.236749
MBTA touchscreen	No	No	-6.58e-05	3.93e-05	40	8	0.10395	0.236749
MBTA grip	No	No	-0.0038511	0.00229933	40	35	0.104018	0.236749
MBTA grip	No	No	-0.0008123	0.00048476	40	23	0.103864	0.236749
MBTA touchscreen	No	No	-0.0037738	0.00225133	40	33	0.103748	0.236749
MBTA wall	Yes	Yes	0.00065324	0.00039036	40	23	0.104305	0.2372
MBTA seat	Yes	Yes	-0.000214	0.00012832	40	17	0.10542	0.239534
MBTA grip	No	No	-0.0011177	0.00067107	40	33	0.105892	0.240404
MBTA touchscreen	Yes	Yes	-0.0440257	0.0264508	40	39	0.106102	0.240678
MBTA grip	No	No	-0.0003198	0.00019263	40	15	0.106921	0.242331
MBTA seat	Yes	Yes	-0.0012455	0.00075126	40	15	0.107428	0.242897
MBTA touchscreen	No	No	-0.0012455	0.00075126	40	15	0.107428	0.242897
MBTA wall	Yes	Yes	-0.0002904	0.00017519	40	14	0.107442	0.242897
MBTA wall	Yes	Yes	0.00013519	8.16e-05	40	11	0.107626	0.243109
MBTA grip	No	No	-2.92e-05	1.76e-05	40	6	0.108121	0.243818
MBTA seat	Yes	Yes	-0.0003601	0.00021759	40	15	0.108032	0.243818
MBTA seat	No	No	-2.9e-05	1.75e-05	40	11	0.108417	0.244279
MBTA grip	No	No	-0.001287	0.00077986	40	20	0.108982	0.245141
MBTA grip	No	No	-0.0001745	0.00010574	40	14	0.10893	0.245141
MBTA seat	Yes	Yes	0.00051797	0.00031465	40	21	0.109823	0.246826
MBTA seat	No	No	3.92e-05	2.38e-05	40	6	0.110124	0.247295
MBTA wall	No	No	0.00052567	0.0003201	40	14	0.110658	0.248217
MBTA wall	Yes	Yes	0.00018723	0.00011403	40	13	0.110719	0.248217
MBTA seat	No	No	-0.0007314	0.0004466	40	20	0.111584	0.249947
