# Supplementary material for: Whole microbial community viability is not quantitatively reflected by propidium monoazide sequencing approach
Source: Microbiome. 2021 Jan 21;9:17. doi: 10.1186/s40168-020-00961-3 (PMC7819323; doi:10.1186/s40168-020-00961-3)
Supplement: Supplementary file 9 — Additional file 8:. All sample meta. [file 40168_2020_961_MOESM9_ESM.xlsx]

## Sheet: all_samples_meta
Samples	Study	16S_copies/ gram or m2	16S_copies_log10	PMA treatment	Sample_type	collection
145_t1145	Our_data	NA	NA	No	MBTA touchscreen	MBTA touchscreen
146_t2146	Our_data	NA	NA	No	MBTA touchscreen	MBTA touchscreen
147_t3147	Our_data	NA	NA	No	MBTA touchscreen	MBTA touchscreen
148_t4148	Our_data	NA	NA	No	MBTA touchscreen	MBTA touchscreen
149_g1149	Our_data	NA	NA	No	MBTA grip	MBTA grip
150_g2150	Our_data	NA	NA	No	MBTA grip	MBTA grip
151_g3151	Our_data	NA	NA	No	MBTA grip	MBTA grip
152_g4152	Our_data	NA	NA	No	MBTA grip	MBTA grip
153_s1153	Our_data	NA	NA	No	MBTA seat	MBTA seat
154_s2154	Our_data	NA	NA	No	MBTA seat	MBTA seat
155_s3155	Our_data	NA	NA	No	MBTA seat	MBTA seat
157_w1157	Our_data	NA	NA	No	MBTA wall	MBTA wall
158_w2158	Our_data	NA	NA	No	MBTA wall	MBTA wall
159_w3159	Our_data	NA	NA	No	MBTA wall	MBTA wall
160_w4160	Our_data	NA	NA	No	MBTA wall	MBTA wall
161_t1161	Our_data	NA	NA	Yes	MBTA touchscreen	MBTA touchscreen
162_t2162	Our_data	NA	NA	Yes	MBTA touchscreen	MBTA touchscreen
163_t3163	Our_data	NA	NA	Yes	MBTA touchscreen	MBTA touchscreen
164_t4164	Our_data	NA	NA	Yes	MBTA touchscreen	MBTA touchscreen
165_g1165	Our_data	NA	NA	Yes	MBTA grip	MBTA grip
166_g2166	Our_data	NA	NA	Yes	MBTA grip	MBTA grip
167_g3167	Our_data	NA	NA	Yes	MBTA grip	MBTA grip
168_g4168	Our_data	NA	NA	Yes	MBTA grip	MBTA grip
169_s1169	Our_data	NA	NA	Yes	MBTA seat	MBTA seat
170_s2170	Our_data	NA	NA	Yes	MBTA seat	MBTA seat
171_s3171	Our_data	NA	NA	Yes	MBTA seat	MBTA seat
172_s4172	Our_data	NA	NA	Yes	MBTA seat	MBTA seat
173_w1173	Our_data	NA	NA	Yes	MBTA wall	MBTA wall
174_w2174	Our_data	NA	NA	Yes	MBTA wall	MBTA wall
176_w4176	Our_data	NA	NA	Yes	MBTA wall	MBTA wall
Air_MBTA_1179	Our_data	NA	NA	No	Air_MBTA_1	control
Air_MBTA_2182	Our_data	NA	NA	No	Air MBTA 2	control
Air_MBTA_3187	Our_data	NA	NA	No	Air MBTA 3	control
Air_MBTA_4190	Our_data	NA	NA	No	Air MBTA 4	control
Air_mouse186	Our_data	NA	NA	No	Lab412B, air control	control
Air_outdoor183	Our_data	NA	NA	No	677 Huntingtun Ave, air control	control
Air_Saliva185	Our_data	NA	NA	No	Lab412B, air control	control
Air_Screen184	Our_data	NA	NA	No	Lab412B, air control	control
SRR3148447	2016_Microbiome_ILMAH	1440000	6	No	Bedroom floor1	clean room floor
SRR3148503	2016_Microbiome_ILMAH	369000	6	Yes	Bedroom floor1	clean room floor
SRR3148448	2016_Microbiome_ILMAH	1100000	6	No	Bedroom floor2	clean room floor
SRR3148504	2016_Microbiome_ILMAH	842000	6	Yes	Bedroom floor2	clean room floor
SRR3148459	2016_Microbiome_ILMAH	583000	6	No	Kitchen floor3	clean room floor
SRR3148449	2016_Microbiome_ILMAH	623000	6	Yes	Kitchen floor3	clean room floor
SRR3148470	2016_Microbiome_ILMAH	2440000	6	No	Kitchen floor4	clean room floor
SRR3148450	2016_Microbiome_ILMAH	1500000	6	Yes	Kitchen floor4	clean room floor
SRR3148481	2016_Microbiome_ILMAH	9410000	7	No	Bathroom floor5	clean room floor
SRR3148451	2016_Microbiome_ILMAH	1700000	6	Yes	Bathroom floor5	clean room floor
SRR3148492	2016_Microbiome_ILMAH	1330000	6	No	Laboratory floor6	clean room floor
SRR3148452	2016_Microbiome_ILMAH	428000	6	Yes	Laboratory floor6	clean room floor
SRR3148501	2016_Microbiome_ILMAH	6430	4	No	Laboratory floor7	clean room floor
SRR3148453	2016_Microbiome_ILMAH	low	2	Yes	Laboratory floor7	clean room floor
SRR3148502	2016_Microbiome_ILMAH	low	2	No	Laboratory floor8	clean room floor
SRR3148454	2016_Microbiome_ILMAH	low	2	Yes	Laboratory floor8	clean room floor
SRR3148455	2016_Microbiome_ILMAH	1230000	6	No	Bedroom floor1	clean room floor
SRR3148464	2016_Microbiome_ILMAH	64900	5	Yes	Bedroom floor1	clean room floor
SRR3148456	2016_Microbiome_ILMAH	532000	6	No	Bedroom floor2	clean room floor
SRR3148465	2016_Microbiome_ILMAH	78000	5	Yes	Bedroom floor2	clean room floor
SRR3148457	2016_Microbiome_ILMAH	888000	6	No	Kitchen floor3	clean room floor
SRR3148466	2016_Microbiome_ILMAH	136000	5	Yes	Kitchen floor3	clean room floor
SRR3148458	2016_Microbiome_ILMAH	14300000	7	No	Kitchen floor4	clean room floor
SRR3148467	2016_Microbiome_ILMAH	466000	6	Yes	Kitchen floor4	clean room floor
SRR3148460	2016_Microbiome_ILMAH	795000	6	No	Bathroom floor5	clean room floor
SRR3148468	2016_Microbiome_ILMAH	34400	5	Yes	Bathroom floor5	clean room floor
SRR3148461	2016_Microbiome_ILMAH	2060000	6	No	Laboratory floor6	clean room floor
SRR3148469	2016_Microbiome_ILMAH	646000	6	Yes	Laboratory floor6	clean room floor
SRR3148462	2016_Microbiome_ILMAH	4160000	7	No	Laboratory floor7	clean room floor
SRR3148471	2016_Microbiome_ILMAH	368000	6	Yes	Laboratory floor7	clean room floor
SRR3148463	2016_Microbiome_ILMAH	1110000	6	No	Laboratory floor8	clean room floor
SRR3148472	2016_Microbiome_ILMAH	693000	6	No	Bedroom floor1	clean room floor
SRR3148479	2016_Microbiome_ILMAH	85200	5	Yes	Bedroom floor1	clean room floor
SRR3148473	2016_Microbiome_ILMAH	289000	5	No	Bedroom floor2	clean room floor
SRR3148480	2016_Microbiome_ILMAH	44500	5	Yes	Bedroom floor2	clean room floor
SRR3148474	2016_Microbiome_ILMAH	4380000	7	No	Kitchen floor3	clean room floor
SRR3148482	2016_Microbiome_ILMAH	379000	6	Yes	Kitchen floor3	clean room floor
SRR3148475	2016_Microbiome_ILMAH	2000000	6	No	Kitchen floor4	clean room floor
SRR3148483	2016_Microbiome_ILMAH	101000	5	Yes	Kitchen floor4	clean room floor
SRR3148476	2016_Microbiome_ILMAH	284000	5	No	Bathroom floor5	clean room floor
SRR3148484	2016_Microbiome_ILMAH	175000	5	Yes	Bathroom floor5	clean room floor
SRR3148477	2016_Microbiome_ILMAH	1090000	6	No	Laboratory floor6	clean room floor
SRR3148485	2016_Microbiome_ILMAH	216000	5	Yes	Laboratory floor6	clean room floor
SRR3148478	2016_Microbiome_ILMAH	371000	6	No	Laboratory floor7	clean room floor
SRR3148486	2016_Microbiome_ILMAH	3810000	7	No	Bedroom floor1	clean room floor
SRR3148494	2016_Microbiome_ILMAH	160000	5	Yes	Bedroom floor1	clean room floor
SRR3148487	2016_Microbiome_ILMAH	3280000	7	No	Bedroom floor2	clean room floor
SRR3148495	2016_Microbiome_ILMAH	338000	6	Yes	Bedroom floor2	clean room floor
SRR3148488	2016_Microbiome_ILMAH	3980000	7	No	Kitchen floor3	clean room floor
SRR3148496	2016_Microbiome_ILMAH	194000	5	Yes	Kitchen floor3	clean room floor
SRR3148489	2016_Microbiome_ILMAH	2410000	6	No	Kitchen floor4	clean room floor
SRR3148490	2016_Microbiome_ILMAH	3290000	7	No	Bathroom floor5	clean room floor
SRR3148497	2016_Microbiome_ILMAH	144000	5	Yes	Bathroom floor5	clean room floor
SRR3148491	2016_Microbiome_ILMAH	5920000	7	No	Laboratory floor6	clean room floor
SRR3148498	2016_Microbiome_ILMAH	1090000	6	Yes	Laboratory floor6	clean room floor
SRR3148499	2016_Microbiome_ILMAH	778000	6	Yes	Laboratory floor7	clean room floor
SRR3148493	2016_Microbiome_ILMAH	4860000	7	No	Laboratory floor8	clean room floor
SRR3148500	2016_Microbiome_ILMAH	341000	6	Yes	Laboratory floor8	clean room floor
Broth_1181	Our_data	NA	NA	No	Plain BHI control	control
C6_1189	Our_data	NA	NA	No	DNA elution buffer	control
Gp1_1_P41	Our_data	933000000000	12	Yes	E.coli	EC/SS culture
Gp1_11	Our_data	2240000000000	12.4	No	E.coli	EC/SS culture
Gp1_2_P42	Our_data	12400	4.09	Yes	E.coli	EC/SS culture
Gp1_22	Our_data	1650000000000	12.2	No	E.coli	EC/SS culture
Gp1_3_P43	Our_data	130000000000	11.1	Yes	E.coli	EC/SS culture
Gp1_33	Our_data	257000000000	11.4	No	E.coli	EC/SS culture
Gp1_4_P44	Our_data	156000000000	11.2	Yes	E.coli	EC/SS culture
Gp1_44	Our_data	109000000000	11	No	E.coli	EC/SS culture
Gp10_1_P77	Our_data	11100000000	10	Yes	E.coli and S.sanguinis	EC/SS culture
Gp10_137	Our_data	4110000	6.61	No	E.coli and S.sanguinis	EC/SS culture
Gp10_2_P78	Our_data	371000000000	11.6	Yes	E.coli and S.sanguinis	EC/SS culture
Gp10_238	Our_data	120000000000	11.1	No	E.coli and S.sanguinis	EC/SS culture
Gp10_3_P79	Our_data	4580	3.66	Yes	E.coli and S.sanguinis	EC/SS culture
Gp10_339	Our_data	543000000	8.73	No	E.coli and S.sanguinis	EC/SS culture
Gp10_4_P80	Our_data	64800000000	10.8	Yes	E.coli and S.sanguinis	EC/SS culture
Gp10_440	Our_data	176000000000	11.2	No	E.coli and S.sanguinis	EC/SS culture
Gp2_1_P45	Our_data	1250000	6.09691	Yes	E.coli	EC/SS culture
Gp2_15	Our_data	229000000	8.35984	No	E.coli	EC/SS culture
Gp2_2_P46	Our_data	2530000	6.40312	Yes	E.coli	EC/SS culture
Gp2_26	Our_data	140000000	8.14613	No	E.coli	EC/SS culture
Gp2_3_P47	Our_data	19600	4.29226	Yes	E.coli	EC/SS culture
Gp2_37	Our_data	260000000	8.41497	No	E.coli	EC/SS culture
Gp2_4_P48	Our_data	599000	5.77743	Yes	E.coli	EC/SS culture
Gp2_48	Our_data	220000000	8.34242	No	E.coli	EC/SS culture
Gp3_1_P49	Our_data	1010000000000	12	Yes	S.sanguinis	EC/SS culture
Gp3_19	Our_data	4650000000000	12.7	No	S.sanguinis	EC/SS culture
Gp3_2_P50	Our_data	14600000	7.16	Yes	S.sanguinis	EC/SS culture
Gp3_210	Our_data	2940000000000	12.5	No	S.sanguinis	EC/SS culture
Gp3_3_P51	Our_data	148000000000	11.2	Yes	S.sanguinis	EC/SS culture
Gp3_311	Our_data	459000000000	11.7	No	S.sanguinis	EC/SS culture
Gp3_4_P52	Our_data	270000000000	11.4	Yes	S.sanguinis	EC/SS culture
Gp3_412	Our_data	305000000000	11.5	No	S.sanguinis	EC/SS culture
Gp4_1_P53	Our_data	24700000	7.39	Yes	S.sanguinis	EC/SS culture
Gp4_113	Our_data	2080000000000	12.3	No	S.sanguinis	EC/SS culture
Gp4_2_P54	Our_data	8260000	6.92	Yes	S.sanguinis	EC/SS culture
Gp4_214	Our_data	1710000000	9.23	No	S.sanguinis	EC/SS culture
Gp4_3_P55	Our_data	24100000	7.38	Yes	S.sanguinis	EC/SS culture
Gp4_315	Our_data	5240000000	9.72	No	S.sanguinis	EC/SS culture
Gp4_4_P56	Our_data	39400000	7.6	Yes	S.sanguinis	EC/SS culture
Gp4_416	Our_data	217000000000	11.3	No	S.sanguinis	EC/SS culture
Gp5_1_P57	Our_data	501000000000	11.7	Yes	E.coli and S.sanguinis	EC/SS culture
Gp5_117	Our_data	617000000	8.79	No	E.coli and S.sanguinis	EC/SS culture
Gp5_2_P58	Our_data	1410000000000	12.1	Yes	E.coli and S.sanguinis	EC/SS culture
Gp5_218	Our_data	108000000000	11	No	E.coli and S.sanguinis	EC/SS culture
Gp5_3_P59	Our_data	18300000	7.26	Yes	E.coli and S.sanguinis	EC/SS culture
Gp5_319	Our_data	515000000000	11.7	No	E.coli and S.sanguinis	EC/SS culture
Gp5_4_P60	Our_data	9050	3.96	Yes	E.coli and S.sanguinis	EC/SS culture
Gp5_420	Our_data	484000000000	11.7	No	E.coli and S.sanguinis	EC/SS culture
Gp6_1_P61	Our_data	5000000	6.7	Yes	E.coli and S.sanguinis	EC/SS culture
Gp6_121	Our_data	627000000000	11.8	No	E.coli and S.sanguinis	EC/SS culture
Gp6_2_P62	Our_data	62100000	7.79	Yes	E.coli and S.sanguinis	EC/SS culture
Gp6_222	Our_data	613000000000	11.8	No	E.coli and S.sanguinis	EC/SS culture
Gp6_3_P63	Our_data	1350000	6.13	Yes	E.coli and S.sanguinis	EC/SS culture
Gp6_323	Our_data	188000000000	11.3	No	E.coli and S.sanguinis	EC/SS culture
Gp6_4_P64	Our_data	4650000	6.67	Yes	E.coli and S.sanguinis	EC/SS culture
Gp6_424	Our_data	31200000000	10.5	No	E.coli and S.sanguinis	EC/SS culture
Gp7_1_P65	Our_data	150000000000	11.2	Yes	E.coli and S.sanguinis	EC/SS culture
Gp7_125	Our_data	738000	5.87	No	E.coli and S.sanguinis	EC/SS culture
Gp7_2_P66	Our_data	206000000000	11.3	Yes	E.coli and S.sanguinis	EC/SS culture
Gp7_226	Our_data	244000000000	11.4	No	E.coli and S.sanguinis	EC/SS culture
Gp7_3_P67	Our_data	97600000000	11	Yes	E.coli and S.sanguinis	EC/SS culture
Gp7_327	Our_data	426000000000	11.6	No	E.coli and S.sanguinis	EC/SS culture
Gp7_4_P68	Our_data	132000000000	11.1	Yes	E.coli and S.sanguinis	EC/SS culture
Gp7_428	Our_data	229000000000	11.4	No	E.coli and S.sanguinis	EC/SS culture
Gp8_1_P69	Our_data	187000000000	11.3	Yes	E.coli and S.sanguinis	EC/SS culture
Gp8_129	Our_data	2070000000000	12.3	No	E.coli and S.sanguinis	EC/SS culture
Gp8_2_P70	Our_data	892000000000	12	Yes	E.coli and S.sanguinis	EC/SS culture
Gp8_230	Our_data	144000000	8.16	No	E.coli and S.sanguinis	EC/SS culture
Gp8_3_P71	Our_data	83300000000	10.9	Yes	E.coli and S.sanguinis	EC/SS culture
Gp8_331	Our_data	423000000000	11.6	No	E.coli and S.sanguinis	EC/SS culture
Gp8_4_P72	Our_data	109000000000	11	Yes	E.coli and S.sanguinis	EC/SS culture
Gp8_432	Our_data	118000000000	11.1	No	E.coli and S.sanguinis	EC/SS culture
Gp9_1_P73	Our_data	217000	5.34	Yes	E.coli and S.sanguinis	EC/SS culture
Gp9_133	Our_data	1710000000000	12.2	No	E.coli and S.sanguinis	EC/SS culture
Gp9_2_P74	Our_data	296000000000	11.5	Yes	E.coli and S.sanguinis	EC/SS culture
Gp9_234	Our_data	3340000000000	12.5	No	E.coli and S.sanguinis	EC/SS culture
Gp9_3_P75	Our_data	4010	3.6	Yes	E.coli and S.sanguinis	EC/SS culture
Gp9_335	Our_data	213000000000	11.3	No	E.coli and S.sanguinis	EC/SS culture
Gp9_4_P76	Our_data	55400000000	10.7	Yes	E.coli and S.sanguinis	EC/SS culture
Gp9_436	Our_data	459000000000	11.7	No	E.coli and S.sanguinis	EC/SS culture
Mouse_1_P101	Our_data	1860000	6.27	Yes	computer mice	computer mice
Mouse_185	Our_data	182000000	8.26	No	computer mice	computer mice
Mouse_2_P102	Our_data	3470000	6.54	Yes	computer mice	computer mice
Mouse_286	Our_data	31700	4.5	No	computer mice	computer mice
Mouse_3_P103	Our_data	402000	5.6	Yes	computer mice	computer mice
Mouse_387	Our_data	36000000	7.56	No	computer mice	computer mice
Mouse_4_P104	Our_data	414000	5.62	Yes	computer mice	computer mice
Mouse_488	Our_data	3310	3.52	No	computer mice	computer mice
PCR_bk_2188	Our_data	NA	NA	No	PCR reagent control	control
PMA_50_1180	Our_data	NA	NA	No	50 PMA reagent control	control
PMA_bk_1177	Our_data	NA	NA	No	blank PMA reagent control	control
PMA_bk_2178	Our_data	NA	NA	No	blank PMA reagent control	control
Saline_outdoor191	Our_data	NA	NA	No	plain saline control	control
Saline_screen192	Our_data	NA	NA	No	plain saline control	control
Saliva_1_P109	Our_data	48200000000	10.7	Yes	saliva	saliva
Saliva_193	Our_data	161000000000	11.2	No	saliva	saliva
Saliva_2_P110	Our_data	24600	4.39	Yes	saliva	saliva
Saliva_294	Our_data	84700	4.93	No	saliva	saliva
Saliva_3_P111	Our_data	33200	4.52	Yes	saliva	saliva
Saliva_395	Our_data	278000	5.44	No	saliva	saliva
Saliva_4_P112	Our_data	9160	3.96	Yes	saliva	saliva
Saliva_496	Our_data	9540	3.98	No	saliva	saliva
Screen_1_P97	Our_data	706000	5.85	Yes	computer screen	computer screen
Screen_181	Our_data	4920000	6.69	No	computer screen	computer screen
Screen_2_P98	Our_data	190000	5.28	Yes	computer screen	computer screen
Screen_282	Our_data	292000000	8.47	No	computer screen	computer screen
Screen_3_P99	Our_data	223000	5.35	Yes	computer screen	computer screen
Screen_383	Our_data	1430000	6.16	No	computer screen	computer screen
Screen_4_P100	Our_data	22900000000	10.4	Yes	computer screen	computer screen
Screen_484	Our_data	1070	3.03	No	computer screen	computer screen
Soil_1_P105	Our_data	1820000000000	12.3	Yes	soil	soil_our
Soil_189	Our_data	1890000000000	12.3	No	soil	soil_our
Soil_2_P106	Our_data	71700000	7.86	Yes	soil	soil_our
Soil_290	Our_data	20000	4.3	No	soil	soil_our
Soil_3_P107	Our_data	6940000	6.84	Yes	soil	soil_our
Soil_391	Our_data	269000000	8.43	No	soil	soil_our
Soil_4_P108	Our_data	3870000000	9.59	Yes	soil	soil_our
Soil_492	Our_data	111000000000	11	No	soil	soil_our
Spike_Mouse_1_P133	Our_data	158000000	8.2	Yes	computer mice	computer mice
Spike_Mouse_1117	Our_data	444000000	8.65	No	computer mice	computer mice
Spike_Mouse_2_P134	Our_data	20500	4.31	Yes	computer mice	computer mice
Spike_Mouse_2118	Our_data	19300	4.29	No	computer mice	computer mice
Spike_Mouse_3_P135	Our_data	2850	3.45	Yes	computer mice	computer mice
Spike_Mouse_3119	Our_data	118000000	8.07	No	computer mice	computer mice
Spike_Mouse_4_P136	Our_data	8450000	6.93	Yes	computer mice	computer mice
Spike_Mouse_4120	Our_data	15100000	7.18	No	computer mice	computer mice
Spike_Saliva_1_P141	Our_data	90500000000	11	Yes	saliva	saliva
Spike_Saliva_1125	Our_data	331000000000	11.5	No	saliva	saliva
Spike_Saliva_2_P142	Our_data	127000	5.1	Yes	saliva	saliva
Spike_Saliva_2126	Our_data	15200000000	10.2	No	saliva	saliva
Spike_Saliva_3_P143	Our_data	288000000	8.46	Yes	saliva	saliva
Spike_Saliva_3127	Our_data	7380	3.87	No	saliva	saliva
Spike_Saliva_4_P144	Our_data	16900000000	10.2	Yes	saliva	saliva
Spike_Saliva_4128	Our_data	2010000000	9.3	No	saliva	saliva
Spike_Screen_1_P129	Our_data	3110	3.49	Yes	computer screen	computer screen
Spike_Screen_1113	Our_data	75500000	7.88	No	computer screen	computer screen
Spike_Screen_2_P130	Our_data	22800	4.36	Yes	computer screen	computer screen
Spike_Screen_2114	Our_data	26700	4.43	No	computer screen	computer screen
Spike_Screen_3_P131	Our_data	5610	3.75	Yes	computer screen	computer screen
Spike_Screen_3115	Our_data	92000000	7.96	No	computer screen	computer screen
Spike_Screen_4_P132	Our_data	687000	5.84	Yes	computer screen	computer screen
Spike_Screen_4116	Our_data	45500000	7.66	No	computer screen	computer screen
Spike_Soil_1_P137	Our_data	4440000000	9.65	Yes	soil	soil_our
Spike_Soil_1121	Our_data	2610000000000	12.4	No	soil	soil_our
Spike_Soil_2_P138	Our_data	67100000000	10.8	Yes	soil	soil_our
Spike_Soil_2122	Our_data	38400	4.58	No	soil	soil_our
Spike_Soil_3_P139	Our_data	4250	3.63	Yes	soil	soil_our
Spike_Soil_3123	Our_data	158000000000	11.2	No	soil	soil_our
Spike_Soil_4_P140	Our_data	39700000000	10.6	Yes	soil	soil_our
Spike_Soil_4124	Our_data	166000000000	11.2	No	soil	soil_our
SRR3178899	2017_NatMicrob	3700000000	10	No	Swamp	soil
SRR3178900	2017_NatMicrob	12500000000	10	Yes	Temperate Conifer Forest	soil
SRR3178901	2017_NatMicrob	15800000000	10	Yes	Temperate Conifer Forest	soil
SRR3178902	2017_NatMicrob	15900000000	10	Yes	Temperate Conifer Forest	soil
SRR3178903	2017_NatMicrob	9890000000	10	Yes	Temperate Conifer Forest	soil
SRR3178904	2017_NatMicrob	10600000000	10	No	Temperate Conifer Forest	soil
SRR3178905	2017_NatMicrob	9980000000	10	Yes	Temperate Conifer Forest	soil
SRR3178906	2017_NatMicrob	12700000000	10	No	Temperate Conifer Forest	soil
SRR3178907	2017_NatMicrob	17200000000	10	No	Temperate Conifer Forest	soil
SRR3178908	2017_NatMicrob	264000000	8	No	Woodland biome	soil
SRR3178909	2017_NatMicrob	578000000	9	No	Woodland biome	soil
SRR3178910	2017_NatMicrob	904000000	9	No	Temperate Broadleaf forest	soil
SRR3178911	2017_NatMicrob	3530000000	10	Yes	Temperate grassland	soil
SRR3178912	2017_NatMicrob	308000000	8	Yes	Temperate Broadleaf forest	soil
SRR3178913	2017_NatMicrob	2660000000	9	No	Temperate Broadleaf forest	soil
SRR3178914	2017_NatMicrob	403000000	9	Yes	Temperate grassland	soil
SRR3178915	2017_NatMicrob	466000000	9	Yes	Temperate grassland	soil
SRR3178916	2017_NatMicrob	4360000000	10	No	Temperate Broadleaf forest	soil
SRR3178917	2017_NatMicrob	1250000000	9	No	Temperate Broadleaf forest	soil
SRR3178918	2017_NatMicrob	43600000	8	Yes	Alpine soil	soil
SRR3178919	2017_NatMicrob	197000000	8	No	Alpine soil	soil
SRR3178920	2017_NatMicrob	836000000	9	No	Temperate grassland	soil
SRR3178921	2017_NatMicrob	684000000	9	No	Alpine soil	soil
SRR3178922	2017_NatMicrob	292000000	8	No	Alpine soil	soil
SRR3178923	2017_NatMicrob	1300000000	9	No	Alpine soil	soil
SRR3178924	2017_NatMicrob	7980000000	10	Yes	Temperate Broadleaf forest	soil
SRR3178925	2017_NatMicrob	126000000	8	Yes	Alpine soil	soil
SRR3178926	2017_NatMicrob	775000000	9	No	Temperate Woodland Biome	soil
SRR3178927	2017_NatMicrob	1080000000	9	Yes	Temperate Conifer Forest	soil
SRR3178928	2017_NatMicrob	1150000000	9	Yes	rangeland biome	soil
SRR3178929	2017_NatMicrob	3070000000	9	No	Temperate grassland	soil
SRR3178930	2017_NatMicrob	978000000	9	Yes	Temperate Woodland biome	soil
SRR3178931	2017_NatMicrob	2390000000	9	No	Temperate grassland	soil
SRR3178932	2017_NatMicrob	3910000000	10	Yes	Temperate grassland	soil
SRR3178933	2017_NatMicrob	4070000000	10	No	Temperate Broadleaf forest	soil
SRR3178934	2017_NatMicrob	75800000	8	Yes	Temperate grassland	soil
SRR3178935	2017_NatMicrob	6420000000	10	Yes	Temperate grassland	soil
SRR3178936	2017_NatMicrob	403000000	9	Yes	Temperate Conifer Forest	soil
SRR3178937	2017_NatMicrob	6150000000	10	Yes	Temperate Conifer Forest	soil
SRR3178938	2017_NatMicrob	18800000000	10	No	Temperate Broadleaf forest	soil
SRR3178939	2017_NatMicrob	1190000000	9	Yes	Temperate grassland	soil
SRR3178940	2017_NatMicrob	2220000000	9	Yes	Temperate Conifer Forest	soil
SRR3178941	2017_NatMicrob	147000000	8	Yes	Temperate Woodland Biome	soil
SRR3178942	2017_NatMicrob	19700000000	10	No	Temperate Broadleaf forest	soil
SRR3178943	2017_NatMicrob	2000000000	9	No	Temperate Conifer Forest	soil
SRR3178944	2017_NatMicrob	1370000000	9	Yes	Temperate Conifer Forest	soil
SRR3178945	2017_NatMicrob	1310000000	9	No	dense settlement biome	soil
SRR3178946	2017_NatMicrob	1540000000	9	Yes	Temperate Conifer Forest	soil
SRR3178947	2017_NatMicrob	443000000	9	Yes	Temperate Conifer Forest	soil
SRR3178948	2017_NatMicrob	684000000	9	Yes	Temperate Conifer Forest	soil
SRR3178949	2017_NatMicrob	6400000000	10	Yes	Temperate grassland	soil
SRR3178950	2017_NatMicrob	1500000000	9	Yes	Temperate grassland	soil
SRR3178951	2017_NatMicrob	4440000000	10	Yes	Temperate grassland	soil
SRR3178952	2017_NatMicrob	126000000	8	Yes	Alpine soil	soil
SRR3178953	2017_NatMicrob	3070000000	9	No	Temperate grassland	soil
SRR3178954	2017_NatMicrob	542000000	9	No	Temperate grassland	soil
SRR3178955	2017_NatMicrob	1420000000	9	No	Temperate grassland	soil
SRR3178956	2017_NatMicrob	2410000000	9	No	Swamp	soil
SRR3178957	2017_NatMicrob	429000000	9	Yes	Alpine soil	soil
SRR3178958	2017_NatMicrob	2300000000	9	No	dense settlement biome	soil
SRR3178959	2017_NatMicrob	675000000	9	No	Temperate grassland	soil
SRR3178960	2017_NatMicrob	2720000000	9	No	Rangeland biome	soil
SRR3178961	2017_NatMicrob	3940000000	10	No	Rangeland biome	soil
SRR3178962	2017_NatMicrob	803000000	9	Yes	Rangeland biome	soil
SRR3178963	2017_NatMicrob	323000000	9	Yes	Rangeland biome	soil
SRR3178964	2017_NatMicrob	248000000	8	Yes	Rangeland biome	soil
SRR3178965	2017_NatMicrob	237000000	8	Yes	Alpine soil	soil
SRR3178966	2017_NatMicrob	1020000000	9	Yes	Rangeland biome	soil
SRR3178967	2017_NatMicrob	1120000000	9	No	dense settlement biome	soil
SRR3178968	2017_NatMicrob	3120000000	9	No	dense settlement biome	soil
SRR3178969	2017_NatMicrob	2220000000	9	No	dense settlement biome	soil
SRR3178970	2017_NatMicrob	1430000000	9	Yes	rangeland biome	soil
SRR3178971	2017_NatMicrob	3470000000	10	Yes	rangeland biome	soil
SRR3178972	2017_NatMicrob	2010000000	9	Yes	rangeland biome	soil
SRR3178973	2017_NatMicrob	549000000	9	Yes	rangeland biome	soil
SRR3178974	2017_NatMicrob	2260000000	9	No	rangeland biome	soil
SRR3178975	2017_NatMicrob	2620000000	9	No	rangeland biome	soil
SRR3178976	2017_NatMicrob	915000000	9	No	rangeland biome	soil
SRR3178977	2017_NatMicrob	1750000000	9	No	rangeland biome	soil
SRR3178978	2017_NatMicrob	8470000000	10	No	Temperate grassland	soil
SRR3178979	2017_NatMicrob	769000000	9	No	Temperate grassland	soil
SRR3178980	2017_NatMicrob	7980000000	10	No	Temperate Conifer Forest	soil
SRR3178981	2017_NatMicrob	1560000000	9	Yes	Temperate Conifer Forest	soil
SRR3178982	2017_NatMicrob	1390000000	9	No	Temperate Conifer Forest	soil
SRR3178983	2017_NatMicrob	1350000000	9	No	Temperate Conifer Forest	soil
SRR3178984	2017_NatMicrob	1180000000	9	No	Temperate Conifer Forest	soil
SRR3178985	2017_NatMicrob	4910000000	10	No	Temperate Conifer Forest	soil
SRR3178986	2017_NatMicrob	2240000000	9	Yes	Temperate grassland	soil
SRR3178987	2017_NatMicrob	385000000	9	Yes	Woodland biome	soil
SRR3178988	2017_NatMicrob	469000000	9	Yes	Woodland biome	soil
SRR3178989	2017_NatMicrob	120000000	8	Yes	Woodland biome	soil
SRR3178990	2017_NatMicrob	1790000000	9	No	Temperate Conifer Forest	soil
SRR3178991	2017_NatMicrob	2680000000	9	No	Temperate Conifer Forest	soil
SRR3178992	2017_NatMicrob	515000000	9	Yes	Temperate Conifer Forest	soil
SRR3178993	2017_NatMicrob	2320000000	9	No	Temperate Conifer Forest	soil
SRR3178994	2017_NatMicrob	719000000	9	Yes	Temperate Woodland biome	soil
SRR3178995	2017_NatMicrob	2820000000	9	Yes	Temperate Woodland biome	soil
SRR3178996	2017_NatMicrob	1230000000	9	No	Temperate Conifer Forest	soil
SRR3178997	2017_NatMicrob	1880000000	9	No	Temperate Conifer Forest	soil
SRR3178998	2017_NatMicrob	850000000	9	Yes	Temperate Woodland biome	soil
SRR3178999	2017_NatMicrob	350000000	9	Yes	Temperate Woodland biome	soil
SRR3179000	2017_NatMicrob	1080000000	9	Yes	Temperate Broadleaf forest	soil
SRR3179001	2017_NatMicrob	262000000	8	Yes	Temperate Woodland Biome	soil
SRR3179002	2017_NatMicrob	299000000	8	Yes	Temperate Broadleaf forest	soil
SRR3179003	2017_NatMicrob	1410000000	9	Yes	Temperate Broadleaf forest	soil
SRR3179004	2017_NatMicrob	2830000000	9	No	Temperate Woodland biome	soil
SRR3179005	2017_NatMicrob	1470000000	9	No	Temperate Woodland biome	soil
SRR3179006	2017_NatMicrob	3620000000	10	No	Temperate Woodland biome	soil
SRR3179007	2017_NatMicrob	2330000000	9	No	Temperate Woodland biome	soil
SRR3179008	2017_NatMicrob	1150000000	9	Yes	Temperate Conifer Forest	soil
SRR3179009	2017_NatMicrob	3310000000	10	No	Temperate grassland	soil
SRR3179010	2017_NatMicrob	1100000000	9	No	Rangeland biome	soil
SRR3179011	2017_NatMicrob	1550000000	9	No	Rangeland biome	soil
SRR3179012	2017_NatMicrob	94100000	8	No	Rangeland biome	soil
SRR3179013	2017_NatMicrob	312000000	8	Yes	Temperate Broadleaf forest	soil
SRR3179014	2017_NatMicrob	15300000	7	Yes	Temperate Broadleaf forest	soil
SRR3179015	2017_NatMicrob	420000000	9	Yes	Temperate Broadleaf forest	soil
SRR3179016	2017_NatMicrob	236000000	8	Yes	Temperate Broadleaf forest	soil
SRR3179017	2017_NatMicrob	83800000	8	Yes	Temperate Broadleaf forest	soil
SRR3179018	2017_NatMicrob	203000000	8	No	Temperate Broadleaf forest	soil
SRR3179019	2017_NatMicrob	1210000000	9	No	Temperate Broadleaf forest	soil
SRR3179020	2017_NatMicrob	2960000000	9	No	rangeland biome	soil
SRR3179021	2017_NatMicrob	3000000000	9	No	rangeland biome	soil
SRR3179022	2017_NatMicrob	1800000000	9	No	rangeland biome	soil
SRR3179023	2017_NatMicrob	2420000000	9	No	rangeland biome	soil
SRR3179024	2017_NatMicrob	2120000000	9	Yes	rangeland biome	soil
SRR3179025	2017_NatMicrob	3350000000	10	Yes	rangeland biome	soil
SRR3179026	2017_NatMicrob	736000000	9	Yes	rangeland biome	soil
SRR3179027	2017_NatMicrob	3310000000	10	Yes	rangeland biome	soil
SRR3179028	2017_NatMicrob	1930000000	9	Yes	rangeland biome	soil
SRR3179029	2017_NatMicrob	666000000	9	No	rangeland biome	soil
SRR3179030	2017_NatMicrob	585000000	9	Yes	Temperate Woodland Biome	soil
SRR3179031	2017_NatMicrob	3590000000	10	No	Temperate Conifer Forest	soil
SRR3179032	2017_NatMicrob	807000000	9	Yes	Temperate Conifer Forest	soil
SRR3179033	2017_NatMicrob	7200000000	10	No	Temperate Broadleaf forest	soil
SRR3179034	2017_NatMicrob	2940000000	9	Yes	Temperate Conifer Forest	soil
SRR3179035	2017_NatMicrob	1980000000	9	Yes	Temperate Conifer Forest	soil
SRR3179036	2017_NatMicrob	4740000000	10	No	Temperate Conifer Forest	soil
SRR3179037	2017_NatMicrob	8580000000	10	No	Temperate Broadleaf forest	soil
SRR3179038	2017_NatMicrob	2720000000	9	Yes	Temperate Broadleaf forest	soil
SRR3179039	2017_NatMicrob	916000000	9	No	Temperate Conifer Forest	soil
SRR3179040	2017_NatMicrob	3840000000	10	No	Temperate grassland	soil
SRR3179041	2017_NatMicrob	8900000000	10	Yes	Temperate grassland	soil
SRR3179042	2017_NatMicrob	1620000000	9	No	Temperate grassland	soil
SRR3179043	2017_NatMicrob	1740000000	9	Yes	Temperate grassland	soil
SRR3179044	2017_NatMicrob	2400000000	9	No	Temperate grassland	soil
SRR3179045	2017_NatMicrob	2480000000	9	No	Temperate grassland	soil
SRR3179046	2017_NatMicrob	1390000000	9	No	Temperate grassland	soil
SRR3179047	2017_NatMicrob	3780000000	10	No	Temperate grassland	soil
SRR3179048	2017_NatMicrob	1290000000	9	Yes	Temperate Conifer Forest	soil
SRR3179049	2017_NatMicrob	3580000000	10	No	Temperate Woodland Biome	soil
SRR3179050	2017_NatMicrob	3880000000	10	Yes	Temperate Conifer Forest	soil
SRR3179051	2017_NatMicrob	776000000	9	No	Swamp	soil
SRR3179052	2017_NatMicrob	3970000000	10	Yes	Temperate Conifer Forest	soil
SRR3179053	2017_NatMicrob	234000000	8	Yes	Alpine soil	soil
SRR3179054	2017_NatMicrob	1200000000	9	Yes	Swamp	soil
SRR3179055	2017_NatMicrob	16600000000	10	No	Temperate Conifer Forest	soil
SRR3179056	2017_NatMicrob	3840000000	10	Yes	Temperate Conifer Forest	soil
SRR3179057	2017_NatMicrob	4430000000	10	Yes	Temperate Conifer Forest	soil
SRR3179058	2017_NatMicrob	8440000000	10	No	Temperate Conifer Forest	soil
SRR3179059	2017_NatMicrob	882000000	9	Yes	Temperate grassland	soil
SRR3179060	2017_NatMicrob	1120000000	9	Yes	Temperate grassland	soil
SRR3179061	2017_NatMicrob	61500000	8	Yes	Temperate grassland	soil
SRR3179062	2017_NatMicrob	635000000	9	No	Temperate grassland	soil
SRR3179063	2017_NatMicrob	954000000	9	Yes	Temperate grassland	soil
SRR3179064	2017_NatMicrob	2200000000	9	No	Temperate grassland	soil
SRR3179065	2017_NatMicrob	1070000000	9	No	Temperate grassland	soil
SRR3179066	2017_NatMicrob	281000000	8	No	Temperate Woodland Biome	soil
SRR3179067	2017_NatMicrob	2450000000	9	No	Temperate grassland	soil
SRR3179068	2017_NatMicrob	52700000	8	Yes	Woodland biome	soil
SRR3179069	2017_NatMicrob	7120000	7	Yes	Woodland biome	soil
SRR3179070	2017_NatMicrob	203000000	8	Yes	Temperate Conifer Forest	soil
SRR3179071	2017_NatMicrob	1970000000	9	No	dense settlement biome	soil
SRR3179072	2017_NatMicrob	1130000000	9	No	Temperate Broadleaf forest	soil
SRR3179073	2017_NatMicrob	39600000	8	Yes	Temperate Conifer Forest	soil
SRR3179074	2017_NatMicrob	1070000000	9	No	Temperate Conifer Forest	soil
SRR3179075	2017_NatMicrob	1940000000	9	No	Temperate Conifer Forest	soil
SRR3179076	2017_NatMicrob	1030000000	9	Yes	Temperate Conifer Forest	soil
SRR3179077	2017_NatMicrob	386000000	9	Yes	Temperate Conifer Forest	soil
SRR3179078	2017_NatMicrob	2440000000	9	No	Temperate Conifer Forest	soil
SRR3179079	2017_NatMicrob	3190000000	10	No	Temperate Conifer Forest	soil
SRR3179080	2017_NatMicrob	1240000000	9	Yes	dense settlement biome	soil
SRR3179081	2017_NatMicrob	4320000000	10	Yes	dense settlement biome	soil
SRR3179082	2017_NatMicrob	14800000000	10	Yes	Temperate Broadleaf forest	soil
SRR3179083	2017_NatMicrob	10700000000	10	No	Temperate Conifer Forest	soil
SRR3179084	2017_NatMicrob	2300000000	9	Yes	dense settlement biome	soil
SRR3179085	2017_NatMicrob	2950000000	9	No	dense settlement biome	soil
SRR3179086	2017_NatMicrob	2920000000	9	No	dense settlement biome	soil
SRR3179087	2017_NatMicrob	1550000000	9	No	dense settlement biome	soil
SRR3179088	2017_NatMicrob	10400000000	10	No	Temperate Broadleaf forest	soil
SRR3179089	2017_NatMicrob	1850000000	9	No	dense settlement biome	soil
SRR3179090	2017_NatMicrob	1310000000	9	No	village biome	soil
SRR3179091	2017_NatMicrob	141000000	8	Yes	Alpine soil	soil
SRR3179092	2017_NatMicrob	1820000000	9	No	village biome	soil
SRR3179093	2017_NatMicrob	1040000000	9	No	village biome	soil
SRR3179094	2017_NatMicrob	3820000000	10	No	village biome	soil
SRR3179095	2017_NatMicrob	1110000000	9	Yes	Temperate grassland	soil
SRR3179096	2017_NatMicrob	1590000000	9	Yes	Temperate grassland	soil
SRR3179097	2017_NatMicrob	780000000	9	Yes	Temperate grassland	soil
SRR3179098	2017_NatMicrob	1350000000	9	No	Temperate Woodland Biome	soil
SRR3179099	2017_NatMicrob	1610000000	9	No	Temperate Conifer Forest	soil
SRR3179100	2017_NatMicrob	12500000000	10	No	Temperate grassland	soil
SRR3179101	2017_NatMicrob	1870000000	9	Yes	Swamp	soil
SRR3179102	2017_NatMicrob	5280000000	10	No	Temperate grassland	soil
SRR3179103	2017_NatMicrob	5370000000	10	No	Temperate grassland	soil
SRR3179104	2017_NatMicrob	1200000000	9	No	Temperate grassland	soil
SRR3179105	2017_NatMicrob	3040000000	9	No	Temperate grassland	soil
SRR3179106	2017_NatMicrob	1380000000	9	Yes	Temperate Conifer Forest	soil
SRR3179107	2017_NatMicrob	322000000	9	Yes	Temperate Conifer Forest	soil
SRR3179108	2017_NatMicrob	860000000	9	Yes	Temperate grassland	soil
SRR3179109	2017_NatMicrob	1360000000	9	Yes	Temperate grassland	soil
SRR3179110	2017_NatMicrob	341000000	9	No	Alpine soil	soil
SRR3179111	2017_NatMicrob	190000000	8	No	Alpine soil	soil
SRR3179112	2017_NatMicrob	2940000000	9	Yes	Temperate grassland	soil
SRR3179113	2017_NatMicrob	306000000	8	No	Alpine soil	soil
SRR3179114	2017_NatMicrob	311000000	8	Yes	Temperate grassland	soil
SRR3179115	2017_NatMicrob	139000000	8	Yes	Alpine soil	soil
SRR3179116	2017_NatMicrob	426000000	9	No	Alpine soil	soil
SRR3179117	2017_NatMicrob	234000000	8	No	Alpine soil	soil
SRR3179118	2017_NatMicrob	98000000	8	Yes	Alpine soil	soil
SRR3179119	2017_NatMicrob	408000000	9	No	Alpine soil	soil
SRR3179120	2017_NatMicrob	4040000000	10	Yes	Temperate grassland	soil
SRR3179121	2017_NatMicrob	4610000000	10	No	Temperate grassland	soil
SRR3179122	2017_NatMicrob	6940000000	10	Yes	Temperate grassland	soil
SRR3179123	2017_NatMicrob	1190000000	9	No	Temperate Woodland biome	soil
SRR3179124	2017_NatMicrob	6500000000	10	No	Temperate grassland	soil
SRR3179125	2017_NatMicrob	254000000	8	Yes	Woodland biome	soil
SRR3179126	2017_NatMicrob	4160000000	10	Yes	Temperate grassland	soil
SRR3179127	2017_NatMicrob	2690000000	9	Yes	Temperate grassland	soil
SRR3179128	2017_NatMicrob	3700000000	10	No	Temperate grassland	soil
SRR3179129	2017_NatMicrob	808000000	9	Yes	Temperate grassland	soil
SRR3179130	2017_NatMicrob	5250000000	10	No	Temperate Conifer Forest	soil
SRR3179131	2017_NatMicrob	58500000	8	Yes	Temperate Conifer Forest	soil
SRR3179132	2017_NatMicrob	3060000000	9	No	Temperate Conifer Forest	soil
SRR3179133	2017_NatMicrob	2590000000	9	No	Temperate Conifer Forest	soil
SRR3179134	2017_NatMicrob	2730000000	9	Yes	Rangeland biome	soil
SRR3179135	2017_NatMicrob	1160000000	9	No	Woodland biome	soil
SRR3179136	2017_NatMicrob	260000000	8	Yes	Woodland biome	soil
SRR3179137	2017_NatMicrob	1150000000	9	Yes	Temperate Conifer Forest	soil
SRR3179138	2017_NatMicrob	636000000	9	Yes	Temperate grassland	soil
SRR3179139	2017_NatMicrob	3880000000	10	No	Temperate Conifer Forest	soil
SRR3179140	2017_NatMicrob	887000000	9	Yes	montane grassland biome	soil
SRR3179141	2017_NatMicrob	1580000000	9	Yes	montane grassland biome	soil
SRR3179142	2017_NatMicrob	525000000	9	Yes	montane grassland biome	soil
SRR3179143	2017_NatMicrob	1050000000	9	Yes	montane grassland biome	soil
SRR3179144	2017_NatMicrob	4050000000	10	No	montane grassland biome	soil
SRR3179145	2017_NatMicrob	2900000000	9	No	montane grassland biome	soil
SRR3179146	2017_NatMicrob	639000000	9	Yes	montane grassland biome	soil
SRR3179147	2017_NatMicrob	1790000000	9	No	montane grassland biome	soil
SRR3179148	2017_NatMicrob	4310000000	10	No	montane grassland biome	soil
SRR3179149	2017_NatMicrob	429000000	9	Yes	Temperate Woodland Biome	soil
SRR3179150	2017_NatMicrob	846000000	9	Yes	Swamp	soil
SRR3179151	2017_NatMicrob	2360000000	9	No	Temperate Conifer Forest	soil
SRR3179152	2017_NatMicrob	608000000	9	Yes	village biome	soil
SRR3179153	2017_NatMicrob	2780000000	9	No	Temperate Conifer Forest	soil
SRR3179154	2017_NatMicrob	1170000000	9	Yes	village biome	soil
SRR3179155	2017_NatMicrob	726000000	9	Yes	village biome	soil
SRR3179156	2017_NatMicrob	2860000000	9	Yes	village biome	soil
SRR3179157	2017_NatMicrob	748000000	9	Yes	village biome	soil
SRR3179158	2017_NatMicrob	463000000	9	No	village biome	soil
SRR3179159	2017_NatMicrob	1320000000	9	Yes	Temperate Broadleaf forest	soil
SRR3179160	2017_NatMicrob	1430000000	9	Yes	dense settlement biome	soil
SRR3179161	2017_NatMicrob	487000000	9	Yes	dense settlement biome	soil
SRR3179162	2017_NatMicrob	3370000000	10	No	Temperate grassland	soil
SRR3179163	2017_NatMicrob	699000000	9	No	Temperate Broadleaf forest	soil
SRR3179164	2017_NatMicrob	595000000	9	No	rangeland biome	soil
SRR3179165	2017_NatMicrob	1540000000	9	Yes	dense settlement biome	soil
SRR3179166	2017_NatMicrob	835000000	9	Yes	dense settlement biome	soil
SRR3179167	2017_NatMicrob	1080000000	9	Yes	dense settlement biome	soil
SRR3179168	2017_NatMicrob	2070000000	9	Yes	dense settlement biome	soil
SRR3179169	2017_NatMicrob	2250000000	9	Yes	dense settlement biome	soil
SRR3179170	2017_NatMicrob	6590000000	10	Yes	Temperate Broadleaf forest	soil
SRR3179171	2017_NatMicrob	4460000000	10	Yes	Temperate Broadleaf forest	soil
SRR3179172	2017_NatMicrob	23500000000	10	No	Temperate Broadleaf forest	soil
SRR3179173	2017_NatMicrob	615000000	9	No	Temperate Conifer Forest	soil
SRR3179174	2017_NatMicrob	4740000000	10	No	Temperate grassland	soil
SRR3179175	2017_NatMicrob	860000000	9	Yes	Swamp	soil
SRR3179176	2017_NatMicrob	7990000000	10	No	Temperate Broadleaf forest	soil
SRR3179177	2017_NatMicrob	942000000	9	No	Temperate Woodland Biome	soil
SRR3179178	2017_NatMicrob	66200000	8	No	Woodland biome	soil
SRR3179179	2017_NatMicrob	1150000000	9	No	Woodland biome	soil
SRR3179180	2017_NatMicrob	186000000	8	No	Woodland biome	soil
SRR3179181	2017_NatMicrob	59300000	8	No	Woodland biome	soil
SRR3179182	2017_NatMicrob	157000000	8	No	Woodland biome	soil
SRR3179183	2017_NatMicrob	25800000	7	No	Woodland biome	soil
SRR3179184	2017_NatMicrob	35700000	8	Yes	Woodland biome	soil
SRR3179185	2017_NatMicrob	67300000	8	No	Woodland biome	soil
SRR3179186	2017_NatMicrob	16700000	7	Yes	Woodland biome	soil
SRR3179187	2017_NatMicrob	47300000	8	Yes	Woodland biome	soil
SRR3179188	2017_NatMicrob	720000000	9	Yes	Temperate Conifer Forest	soil
SRR3179189	2017_NatMicrob	1870000000	9	No	Temperate Broadleaf forest	soil
SRR3179190	2017_NatMicrob	16100000000	10	No	Temperate Broadleaf forest	soil
SRR3179191	2017_NatMicrob	24500000000	10	No	Temperate Broadleaf forest	soil
SRR3179192	2017_NatMicrob	1440000000	9	No	montane grassland biome	soil
SRR3179193	2017_NatMicrob	21500000000	10	No	Temperate Broadleaf forest	soil
SRR3179194	2017_NatMicrob	13200000000	10	Yes	Temperate Broadleaf forest	soil
SRR3179195	2017_NatMicrob	6680000000	10	Yes	Temperate Broadleaf forest	soil
SRR3179196	2017_NatMicrob	22000000000	10	Yes	Temperate Broadleaf forest	soil
SRR3179197	2017_NatMicrob	7060000000	10	Yes	Temperate Broadleaf forest	soil
SRR3179198	2017_NatMicrob	1290000000	9	Yes	Temperate Conifer Forest	soil
SRR3179199	2017_NatMicrob	4890000000	10	Yes	Temperate Broadleaf forest	soil
SRR3179200	2017_NatMicrob	6020000000	10	Yes	Temperate Conifer Forest	soil
SRR3179201	2017_NatMicrob	3050000000	9	No	Swamp	soil
SRR3179202	2017_NatMicrob	5220000000	10	No	Temperate Conifer Forest	soil
SRR3179203	2017_NatMicrob	323000000	9	Yes	Alpine soil	soil
SRR3179204	2017_NatMicrob	379000000	9	Yes	Temperate Woodland Biome	soil
SRR3179205	2017_NatMicrob	14500000000	10	No	Temperate Conifer Forest	soil
SRR3179206	2017_NatMicrob	2690000000	9	No	Swamp	soil
SRR3179207	2017_NatMicrob	1370000000	9	Yes	Swamp	soil
SRR3179208	2017_NatMicrob	6070000000	10	No	Temperate Conifer Forest	soil
SRR7851473	2019_EMB	NA	NA	No	stool	stool
SRR7851474	2019_EMB	NA	NA	Yes	fresh anaerobic stool	stool
SRR7851475	2019_EMB	NA	NA	Yes	freeze-thawed anaerobic stool	stool
SRR7851476	2019_EMB	NA	NA	No	fresh anaerobic stool	stool
SRR7851477	2019_EMB	NA	NA	Yes	fresh ambient air\, PMA treated	stool
SRR7851478	2019_EMB	NA	NA	Yes	fresh ambient stool	stool
SRR7851479	2019_EMB	NA	NA	Yes	fresh anaerobic stool	stool
SRR7851480	2019_EMB	NA	NA	No	fresh anaerobic stool	stool
SRR7851481	2019_EMB	NA	NA	Yes	fresh ambient stool	stool
SRR7851482	2019_EMB	NA	NA	No	fresh ambient stool	stool
SRR7851483	2019_EMB	NA	NA	Yes	fresh anaerobic stool	stool
SRR7851484	2019_EMB	NA	NA	No	fresh anaerobic stool	stool
SRR7851485	2019_EMB	NA	NA	No	freeze-thawed anaerobic stool	stool
SRR7851486	2019_EMB	NA	NA	Yes	freeze-thawed anaerobic stool	stool
SRR7851487	2019_EMB	NA	NA	No	fresh ambient stool	stool
SRR7851488	2019_EMB	NA	NA	Yes	fresh ambient stool	stool
SRR7851489	2019_EMB	NA	NA	No	fresh ambient stool	stool
SRR7851490	2019_EMB	NA	NA	No	freeze-thawed anaerobic stool	stool
SRR7851491	2019_EMB	NA	NA	Yes	fresh ambient stool	stool
SRR7851492	2019_EMB	NA	NA	No	freeze-thawed anaerobic stool	stool
SRR7851493	2019_EMB	NA	NA	Yes	fresh ambient stool	stool
SRR7851494	2019_EMB	NA	NA	Yes	fresh ambient stool	stool
SRR7851495	2019_EMB	NA	NA	Yes	freeze-thawed anaerobic stool	stool
SRR7851496	2019_EMB	NA	NA	No	freeze-thawed anaerobic stool	stool
SRR7851497	2019_EMB	NA	NA	Yes	fresh ambient stool	stool
SRR7851498	2019_EMB	NA	NA	No	fresh ambient stool	stool
SRR7851499	2019_EMB	NA	NA	No	fresh anaerobic stool	stool
SRR7851500	2019_EMB	NA	NA	Yes	fresh anaerobic stool	stool
SRR7851501	2019_EMB	NA	NA	No	fresh anaerobic stool	stool
SRR7851502	2019_EMB	NA	NA	Yes	freeze-thawed anaerobic stool	stool
SRR7851503	2019_EMB	NA	NA	Yes	freeze-thawed anaerobic stool	stool
SRR7851504	2019_EMB	NA	NA	No	fresh ambient stool	stool
SRR7851505	2019_EMB	NA	NA	Yes	fresh anaerobic stool	stool
SRR7851506	2019_EMB	NA	NA	No	fresh ambient stool	stool
SRR7851507	2019_EMB	NA	NA	No	fresh ambient stool	stool
SRR7851508	2019_EMB	NA	NA	Yes	fresh ambient stool	stool
SRR7851509	2019_EMB	NA	NA	Yes	fresh anaerobic stool	stool
SRR7851510	2019_EMB	NA	NA	No	freeze-thawed anaerobic stool	stool
SRR7851511	2019_EMB	NA	NA	Yes	freeze-thawed anaerobic stool	stool
SRR7851512	2019_EMB	NA	NA	No	freeze-thawed anaerobic stool	stool
SRR7851513	2019_EMB	NA	NA	Yes	freeze-thawed anaerobic stool	stool
SRR7851514	2019_EMB	NA	NA	No	fresh anaerobic\, control	stool
SRR7851515	2019_EMB	NA	NA	Yes	fresh anaerobic\, PMA treated	stool
SRR7851516	2019_EMB	NA	NA	No	freeze-thawed anaerobic stool	stool
SRR7851517	2019_EMB	NA	NA	Yes	fresh anaerobic stool	stool
SRR7851518	2019_EMB	NA	NA	No	freeze-thawed anaerobic stool	stool
SRR7851519	2019_EMB	NA	NA	Yes	freeze-thawed anaerobic stool	stool
SRR7851520	2019_EMB	NA	NA	No	fresh ambient stool	stool
